# Supplementary material for: Synthetic and mechanistic study on the conjugate isothiocyanation of enones with trimethylsilyl isothiocyanate
Source: Royal Society of Chemistry journal article supplement (doi:10.1039/d3ob01710a), 2023-01-01
Supplement: d3ob01710a3.pdf [file d3ob01710a3.pdf]

Supporting information  
for  
**Synthetic and mechanistic study on the conjugate  
isothiocyanation of enones with trimethylsilyl  
isothiocyanate**

Table of Contents

|                                                                                                                     |     |
|---------------------------------------------------------------------------------------------------------------------|-----|
| 1. General methods and starting materials .....                                                                     | 2   |
| 2. Synthesis and characterization data of enones .....                                                              | 2   |
| 2.1 General procedures: synthesis of chalcones via Claisen-Schmidt condensation and enones via Aldol reaction ..... | 2   |
| 2.2 Characterization data of enones .....                                                                           | 4   |
| 3. Optimization of the reaction conditions .....                                                                    | 10  |
| 4. Synthesis and characterization data of isothiocyanation products .....                                           | 12  |
| 4.1 General procedure .....                                                                                         | 12  |
| 4.2 Spectral identification of isothiocyanate vs thiocyanate isomers .....                                          | 12  |
| 4.3 Characterization data of isothiocyanation products and derivatives .....                                        | 16  |
| 5. Additional control experiments .....                                                                             | 27  |
| 6. Computational details .....                                                                                      | 28  |
| 7. Additional Figures/Schemes .....                                                                                 | 29  |
| 8. Complete energy data .....                                                                                       | 36  |
| 9. XYZ coordinates for all computed structures .....                                                                | 39  |
| 10. Spectral data .....                                                                                             | 51  |
| 10.1 <sup>1</sup> H NMR for enone substrates .....                                                                  | 51  |
| 10.2 <sup>1</sup> H, <sup>13</sup> C, and <sup>19</sup> F NMR for isothiocyanation products and derivatives .....   | 67  |
| 11. References .....                                                                                                | 108 |

## 1. General methods and starting materials

All solvents were used as commercially supplied. All reagents were purchased from commercial sources such as Sigma-Aldrich, TCI, VWR and used as obtained. Thin-layer chromatography was performed using 200  $\mu\text{m}$  aluminum-backed plates purchased from Silicycle, which were visualized under UV light. Flash chromatography was carried out using silica gel from Silicycle (siliaflash P60, 40-63  $\mu\text{m}$ ).

$^1\text{H}$  NMR (500 MHz) and  $^{13}\text{C}$  NMR (126 MHz) spectra were recorded on a 500 MHz Bruker ultrashield spectrometer.  $^{19}\text{F}$  NMR (283 MHz) spectra were recorded on a 300 MHz Bruker ultrashield spectrometer. Chemical shifts are given in parts per million (ppm,  $\delta$ ), referenced to the tetramethylsilane internal standard in all NMR solvents, calibrated at 0.0 ppm.  $^1\text{H}$  and  $^{13}\text{C}$  (where applicable) NMR splitting patterns are designated as singlet (s), doublet (d), triplet (t), quartet (q), pentet (p), sextet (sext) or heptet (hept). Mass spectrums were recorded on a high-resolution Orbitrap Q Exactive mass spectrometer (Thermo Scientific, San Jose, CA). FTIR spectra were collected by Shimadzu IRAffinity-1 Fourier transform infrared spectrophotometer.

## 2. Synthesis and characterization data of enones

### 2.1 General procedures: synthesis of chalcones via Claisen-Schmidt condensation and enones via Aldol reaction

Procedure A: Following a modified literature procedure (Claisen-Schmidt condensation):<sup>1</sup>

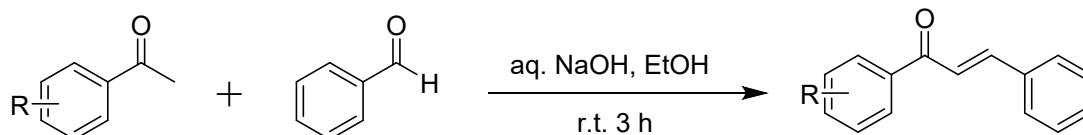

In a round-bottom flask, benzaldehyde (0.52 mL, 5 mmol) and acetophenone (0.73 mL, 6 mmol, 1.2 equiv.) were dissolved in ethanol (95%). Then, a solution of sodium hydroxide (2 mL, 3 M) was added at room temperature and the mixture stirred for 3 hours. After the reaction was finished, ice cold water was added, then the solid was filtered and washed with cold water.

Procedure B: Following a modified literature procedure (Aldol reaction):<sup>2</sup>

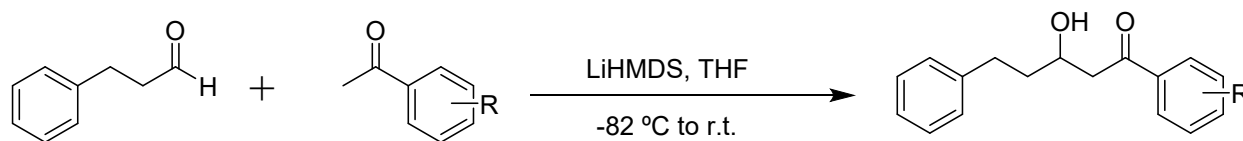

To a flame-dried round-bottom flask, Lithium bis(trimethylsilyl)amide solution in toluene (6 mL, 6 mmol, 1.2 equiv.) was added to anhydrous tetrahydrofuran (20 mL) under argon atmosphere and the solution was cooled to -82 °C using a liquid nitrogen/ethyl acetate bath and stirred for 30 minutes. Then, acetophenone (0.58 mL, 5 mmol, 1.0 equiv.) was added at -82 °C and the solution

was stirred for another 30 minutes. Then, the 3-phenylpropionaldehyde (1.4 mL, 10 mmol, 2.0 equiv.) was added dropwise and the mixture was stirred at -82 °C for 2 hours. After the reaction was finished, it was quenched with a mixture of H<sub>2</sub>O:AcOH (1:1, 1 mL) and allowed to warm to room temperature. Water was added (5 mL) and the aqueous phase was extracted twice with diethyl ether (2 x 20 mL). The combined organic phases were washed with NaHCO<sub>3</sub> (sat), then brine, and the organic solution was dried over Na<sub>2</sub>SO<sub>4</sub>, filtered and concentrated under reduced pressure. The crude mixture obtained was used without further purification.

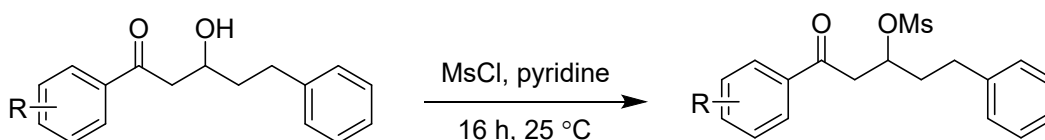

The aldol was dissolved in pyridine (1.1 M) and cooled to 0 °C. Methanesulfonyl chloride (5 mmol) was added dropwise at 0 °C and the reaction was stirred 16 hours at room temperature. Then, a mixture of water and diethyl ether (1:1) was added. The two phases were separated, and the organic phase was washed twice with a saturated aqueous solution of CuSO<sub>4</sub>, then with brine. The organic phase was dried over Na<sub>2</sub>SO<sub>4</sub>, filtered, and concentrated under reduced pressure. The mesylated aldol was used without further purification.

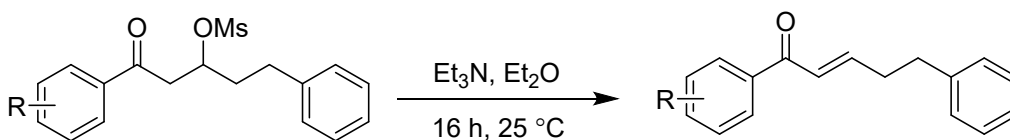

The mesylated aldol was dissolved in diethyl ether (1.4 M). Then, trimethylamine (5 mmol) was added dropwise, and the reaction was stirred for 16 hours at room temperature. Then, a mixture of water and diethyl ether were added (1:1). The two phases were separated, and the organic phase was washed with HCl (1M), NaHCO<sub>3</sub> (sat) and brine. The organic phase was dried over Na<sub>2</sub>SO<sub>4</sub>, filtered, and concentrated under reduced pressure. The residue was purified by flash chromatography (hexane/ethyl acetate) to afford the desired product.

Procedure C: Following a modified literature procedure:<sup>3, 4</sup>

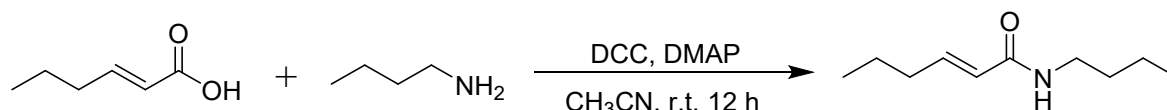

In a round-bottom flask, to a stirred solution of trans-2-hexenoic acid (5 mmol, 1.0 eq) in anhydrous acetonitrile (50 mL), n-butylamine (6 mmol, 1.2 eq) and dicyclohexylcarbodiimide (6 mmol, 1.2 eq) were added at 0 °C and stirred for 10 min, then 4-Dimethylaminopyridine (0.5 mmol, 0.1 eq) was added and the mixture was stirred at room temperature for 12 hours. After completion of the reaction, the mixture was concentrated under reduced pressure, then extracted with dichloromethane (2 x 20 mL). The organic phase was dried over anhydrous Na<sub>2</sub>SO<sub>4</sub>, filtered,

and concentrated under reduced pressure. The crude compound was purified by flash chromatography (hexane/ethyl acetate) to afford the desired product.

## 2.2 Characterization data of enones

### (*E*)-1,5-diphenylpent-2-en-1-one (**1a**)

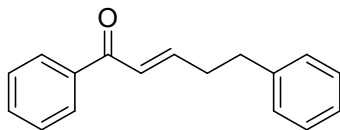

Following procedure B, acetophenone (0.58 mL, 5 mmol), 3-phenylpropionaldehyde (1.4 mL, 10 mmol), methanesulfonyl chloride (0.39 mL, 5 mmol) and trimethylamine (0.45 mL, 5 mmol) gave **1a** as a yellowish oil (0.53 g, 2.25 mmol, 45% overall yield). Purification was performed by flash column chromatography (hexane/ethyl acetate 25:1). All characterization data were consistent with those reported.<sup>2</sup>

<sup>1</sup>H NMR (500 MHz, Chloroform-*d*)  $\delta$  7.92 (dt,  $J = 8.3, 1.1$  Hz, 2H), 7.58 (t,  $J = 7.4$  Hz, 1H), 7.49 (dd,  $J = 8.4, 7.0$  Hz, 2H), 7.37 – 7.31 (m, 3H), 7.24 (s, 2H), 7.12 (dt,  $J = 15.6, 6.8$  Hz, 1H), 6.94 – 6.83 (m, 1H), 2.89 (t,  $J = 7.7$  Hz, 2H), 2.72 – 2.66 (m, 2H).

### (*E*)-5-phenyl-1-(*p*-tolyl)pent-2-en-1-one (**1b**)

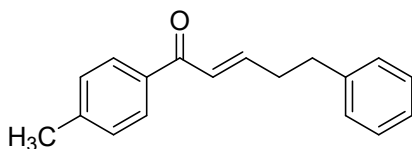

Following procedure B, 4'-Methylacetophenone (0.68 mL, 5 mmol), 3-phenylpropionaldehyde (1.4 mL, 10 mmol), methanesulfonyl chloride (0.39 mL, 5 mmol) and trimethylamine (0.45 mL, 5 mmol) gave **1b** as a colorless oil (0.65 g, 2.6 mmol, 52% overall yield). Purification was performed by flash column chromatography (hexane/ethyl acetate 20:1). All characterization data were consistent with those reported.<sup>5</sup>

<sup>1</sup>H NMR (500 MHz, Chloroform-*d*)  $\delta$  7.82 – 7.76 (m, 2H), 7.31 – 7.27 (m, 2H), 7.24 – 7.18 (m, 5H), 7.05 (dt,  $J = 15.4, 6.9$  Hz, 1H), 6.85 (dt,  $J = 15.4, 1.5$  Hz, 1H), 2.82 (t,  $J = 7.7$  Hz, 2H), 2.61 (dtd,  $J = 8.7, 7.0, 1.5$  Hz, 2H), 2.38 (s, 3H).

### (*E*)-1-(4-methoxyphenyl)-5-phenylpent-2-en-1-one (**1c**)

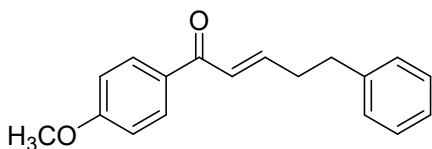

Following procedure B, 4'-methoxyacetophenone (0.67 mL, 5 mmol), 3-phenylpropionaldehyde (1.4 mL, 10 mmol), methanesulfonyl chloride (0.39 mL, 5 mmol) and trimethylamine (0.45 mL, 5 mmol) gave **1c** as a light-yellow oil (0.64 g, 2.4 mmol, 48% overall yield). Purification was performed by flash column chromatography (hexane/ethyl acetate 15:1). All characterization data were consistent with those reported.<sup>6</sup>

<sup>1</sup>H NMR (500 MHz, Chloroform-d)  $\delta$  7.98 – 7.83 (m, 2H), 7.32 – 7.26 (m, 2H), 7.20 (m,  $J$  = 7.1, 3.7, 2.2 Hz, 3H), 7.05 (dt,  $J$  = 15.3, 6.8 Hz, 1H), 6.93 – 6.90 (m, 2H), 6.87 (dt,  $J$  = 15.3, 1.5 Hz, 1H), 3.83 (s, 3H), 2.82 (t,  $J$  = 7.7 Hz, 2H), 2.61 (dtd,  $J$  = 8.8, 7.0, 1.5 Hz, 2H).

(*E*)-4-(5-phenylpent-2-enoyl)benzonitrile (**1d**)

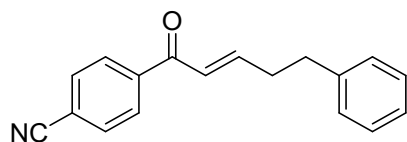

Following procedure B, 4-acetylbenzonitrile (0.73 g, 5 mmol), 3-phenylpropionaldehyde (1.4 mL, 10 mmol), methanesulfonyl chloride (0.39 mL, 5 mmol) and trimethylamine (0.45 mL, 5 mmol) gave **1d** as a white solid (0.73 g, 2.4 mmol, 48% overall yield). Purification was performed by flash column chromatography (hexane/ethyl acetate 15:1). All characterization data were consistent with those reported.<sup>6</sup>

<sup>1</sup>H NMR (500 MHz, Chloroform-d)  $\delta$  7.93 – 7.89 (m, 2H), 7.76 – 7.72 (m, 2H), 7.33 – 7.29 (m, 2H), 7.25 – 7.18 (m, 3H), 7.10 (dt,  $J$  = 15.4, 6.9 Hz, 1H), 6.79 (dt,  $J$  = 15.5, 1.5 Hz, 1H), 2.86 (t,  $J$  = 7.6 Hz, 2H), 2.67 (dtd,  $J$  = 8.8, 7.0, 1.5 Hz, 2H).

(*E*)-1-(4-fluorophenyl)-5-phenylpent-2-en-1-one (**1e**)

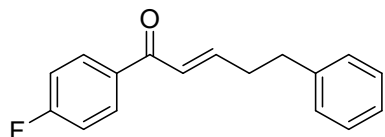

Following procedure B, 4'-fluoroacetophenone (0.61 mL, 5 mmol), 3-phenylpropionaldehyde (1.4 mL, 10 mmol), methanesulfonyl chloride (0.39 mL, 5 mmol) and trimethylamine (0.45 mL, 5 mmol) gave **1e** as a colorless oil (0.64 g, 2.5 mmol, 50% overall yield). Purification was performed by flash column chromatography (hexane/ethyl acetate 20:1). All characterization data were consistent with those reported.<sup>6</sup>

<sup>1</sup>H NMR (500 MHz, Chloroform-d)  $\delta$  7.89 (m, 2H), 7.29 (m, 2H), 7.20 (m, 3H), 7.10 (m, 3H), 6.84 (dq, 1H), 2.83 (t, 2H), 2.63 (m, 2H).

<sup>19</sup>F NMR (283 MHz, Chloroform-d)  $\delta$  -109.55.

(*E*)-5-phenyl-1-(4-(trifluoromethyl)phenyl)pent-2-en-1-one (**1f**)

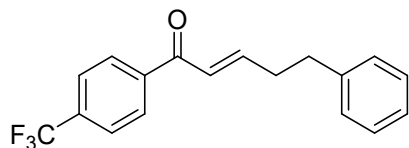

Following procedure B, 4'-(Trifluoromethyl)acetophenone (0.96 g, 5 mmol), 3-phenylpropionaldehyde (1.4 mL, 10 mmol), methanesulfonyl chloride (0.39 mL, 5 mmol) and trimethylamine (0.45 mL, 5 mmol) gave **1f** as a yellow solid (0.63 g, 2.4 mmol, 48% overall yield). Purification was performed by flash column chromatography (hexane/ethyl acetate 20:1). All characterization data were consistent with those reported.<sup>6</sup>

<sup>1</sup>H NMR (500 MHz, Chloroform-d)  $\delta$  7.96 – 7.91 (m, 2H), 7.71 (d,  $J$  = 8.2 Hz, 2H), 7.34 – 7.29 (m, 2H), 7.25 – 7.19 (m, 3H), 7.10 (dt,  $J$  = 15.5, 6.9 Hz, 1H), 6.81 (dt,  $J$  = 15.5, 1.5 Hz, 1H), 2.86 (t,  $J$  = 7.6 Hz, 2H), 2.67 (dtd,  $J$  = 8.8, 7.0, 1.5 Hz, 2H).

<sup>19</sup>F NMR (283 MHz, Chloroform-d)  $\delta$  -64.61.

(*E*)-1-(4-nitrophenyl)-5-phenylpent-2-en-1-one (**1g**)

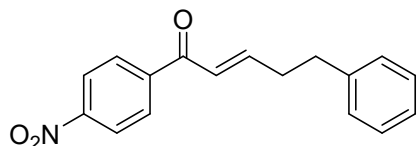

Following procedure B, 4'-nitroacetophenone (0.83 g, 5 mmol), 3-phenylpropionaldehyde (1.4 mL, 10 mmol), methanesulfonyl chloride (0.39 mL, 5 mmol) and trimethylamine (0.45 mL, 5 mmol) gave **1g** as a yellowish solid (0.36 g, 1.28 mmol, 26% overall yield). Purification was performed by flash column chromatography (hexane/ethyl acetate 10:1). All characterization data were consistent with those reported.<sup>7</sup>

<sup>1</sup>H NMR (500 MHz, Chloroform-d)  $\delta$  8.32 – 8.27 (m, 2H), 8.00 – 7.95 (m, 2H), 7.34 – 7.30 (m, 2H), 7.22 (dd,  $J$  = 9.5, 7.8 Hz, 3H), 7.11 (dt,  $J$  = 15.4, 6.9 Hz, 1H), 6.81 (dt,  $J$  = 15.5, 1.5 Hz, 1H), 2.87 (t,  $J$  = 7.6 Hz, 2H), 2.73 – 2.65 (m, 2H).

(*E*)-1-(furan-2-yl)-5-phenylpent-2-en-1-one (**1h**)

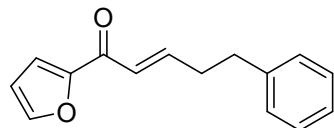

Following procedure B, 2-acetylfuran (0.50 mL, 5 mmol), 3-phenylpropionaldehyde (1.4 mL, 10 mmol), methanesulfonyl chloride (0.39 mL, 5 mmol) and trimethylamine (0.45 mL, 5 mmol) gave **1h** as a yellowish oil (0.51 g, 2.25 mmol, 45% overall yield). Purification was performed by flash column chromatography (hexane/ethyl acetate 25:1). All characterization data were consistent with those reported.<sup>8</sup>

$^1\text{H}$  NMR (500 MHz, Chloroform- $d$ )  $\delta$  7.59 (dd,  $J$  = 1.8, 0.8 Hz, 1H), 7.31 – 7.26 (m, 2H), 7.21 – 7.15 (m, 5H), 6.80 (dt,  $J$  = 15.4, 1.5 Hz, 1H), 6.53 (dd,  $J$  = 3.6, 1.7 Hz, 1H), 2.86 – 2.80 (m, 2H), 2.62 (dtd,  $J$  = 8.9, 7.0, 1.6 Hz, 2H).

$^{13}\text{C}$  NMR (126 MHz, Chloroform- $d$ )  $\delta$  178.09, 153.33, 147.81, 146.47, 140.83, 128.50, 126.20, 125.43, 120.44, 117.60, 112.39, 34.47, 29.71.

(*E*)-5-phenyl-1-(pyridin-2-yl)pent-2-en-1-one (**1i**)

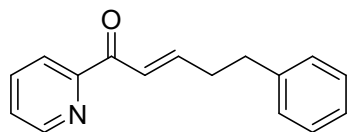

Following procedure B, 2-acetylpyridine (0.56 mL, 5 mmol), 3-phenylpropionaldehyde (1.4 mL, 10 mmol), methanesulfonyl chloride (0.39 mL, 5 mmol) and trimethylamine (0.45 mL, 5 mmol) gave **1i** as a yellowish oil (0.56 g, 2.35 mmol, 47% overall yield). Purification was performed by flash column chromatography (hexane/ethyl acetate 20:1). All characterization data were consistent with those reported.<sup>8</sup>

$^1\text{H}$  NMR (500 MHz, Chloroform- $d$ )  $\delta$  7.93 – 7.89 (m, 2H), 7.77 – 7.73 (m, 2H), 7.34 – 7.29 (m, 2H), 7.25 – 7.18 (m, 3H), 7.09 (dt,  $J$  = 15.5, 6.9 Hz, 1H), 6.78 (dt,  $J$  = 15.5, 1.5 Hz, 1H), 2.86 (t,  $J$  = 7.6 Hz, 2H), 2.72 – 2.62 (m, 2H).

$^{13}\text{C}$  NMR (126 MHz, Chloroform- $d$ )  $\delta$  189.34, 155.99, 150.71, 150.04, 142.73, 140.44, 129.45, 128.60, 128.41, 126.37, 126.32, 123.74, 34.54, 34.33.

(*E*)-3-cyclohexyl-1-phenylprop-2-en-1-one (**1j**)

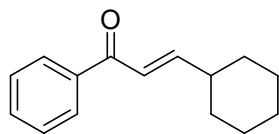

Following procedure B, acetophenone (0.58 mL, 5 mmol), cyclohexane carbaldehyde (1.3 mL, 10 mmol), methanesulfonyl chloride (0.39 mL, 5 mmol) and trimethylamine (0.45 mL, 5 mmol) gave **1j** as a light-yellow solid (0.40 g, 2.0 mmol, 40% overall yield). Purification was performed by flash column chromatography (hexane/ethyl acetate 25:1). All characterization data were consistent with those reported.<sup>9</sup>

$^1\text{H}$  NMR (500 MHz, Chloroform- $d$ )  $\delta$  8.00 – 7.87 (m, 2H), 7.59 – 7.50 (m, 1H), 7.44 (ddt,  $J$  = 9.5, 7.6, 2.0 Hz, 2H), 7.00 (ddd,  $J$  = 15.7, 6.8, 1.9 Hz, 1H), 6.82 (dd,  $J$  = 15.5, 1.5 Hz, 1H), 2.24 (m, 1H), 1.81 (dq,  $J$  = 12.7, 5.0, 2.7 Hz, 4H), 1.37 – 1.18 (m, 6H).

(*E*)-4-methyl-1-phenylpent-2-en-1-one (**1k**)

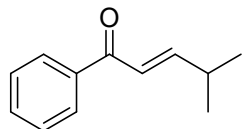

Following procedure B, acetophenone (0.58 mL, 5 mmol), isobutyraldehyde (0.92 mL, 10 mmol), methanesulfonyl chloride (0.39 mL, 5 mmol) and trimethylamine (0.45 mL, 5 mmol) gave **1k** as a light-yellow oil (0.48 g, 2.75 mmol, 55% overall yield). Purification was performed by flash column chromatography (hexane/ethyl acetate 30:1). All characterization data were consistent with those reported.<sup>10</sup>

<sup>1</sup>H NMR (500 MHz, Chloroform-d)  $\delta$  7.97 – 7.88 (m, 2H), 7.60 – 7.51 (m, 1H), 7.50 – 7.44 (m, 2H), 7.04 (dd,  $J = 15.5, 6.7$  Hz, 1H), 6.83 (dd,  $J = 15.5, 1.4$  Hz, 1H), 2.57 (m,  $J = 13.5, 6.7, 1.4$  Hz, 1H), 1.13 (d,  $J = 6.8$  Hz, 6H).

(*E*)-4,4-dimethyl-1-phenylpent-2-en-1-one (**1k**)

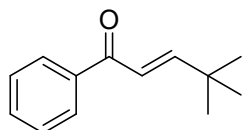

Following procedure B, acetophenone (0.58 mL, 5 mmol), pivalaldehyde (1.10 mL, 10 mmol), methanesulfonyl chloride (0.39 mL, 5 mmol) and trimethylamine (0.45 mL, 5 mmol) gave **1l** as a colorless oil (0.50 g, 2.65 mmol, 53% overall yield). Purification was performed by flash column chromatography (hexane/ethyl acetate 35:1). All characterization data were consistent with those reported.<sup>2</sup>

<sup>1</sup>H NMR (500 MHz, Chloroform-d)  $\delta$  7.95 – 7.90 (m, 2H), 7.56 – 7.51 (m, 1H), 7.45 (t,  $J = 8.1, 6.6$  Hz, 2H), 7.07 (d,  $J = 15.7$  Hz, 1H), 6.79 (d,  $J = 15.7$  Hz, 1H), 1.14 (s, 9H).

(*E*)-1-phenylhept-2-en-1-one (**1m**)

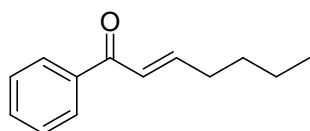

Following procedure B, acetophenone (0.58 mL, 5 mmol), pentanal (1.08 mL, 10 mmol), methanesulfonyl chloride (0.39 mL, 5 mmol) and trimethylamine (0.45 mL, 5 mmol) gave **1m** as a light-yellow oil (0.42 g, 2.25 mmol, 45% overall yield). Purification was performed by flash column chromatography (hexane/ethyl acetate 25:1). All characterization data were consistent with those reported.<sup>11</sup>

<sup>1</sup>H NMR (500 MHz, Chloroform-d)  $\delta$  7.94 – 7.91 (m, 2H), 7.58 – 7.53 (m, 1H), 7.48 – 7.44 (m, 2H), 7.07 (dt,  $J = 15.3, 6.9$  Hz, 1H), 6.88 (dt,  $J = 15.4, 1.5$  Hz, 1H), 2.32 (qd,  $J = 7.0, 1.5$  Hz, 2H), 1.55 – 1.48 (m, 2H), 1.44 – 1.34 (m, 2H), 0.93 (t,  $J = 7.3$  Hz, 3H).



(*E*)-1-phenyloct-2-en-1-one (**1n**)

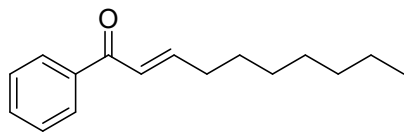

Following procedure B, acetophenone (0.58 mL, 5 mmol), octanal (1.6 mL, 10 mmol), methanesulfonyl chloride (0.39 mL, 5 mmol) and trimethylamine (0.45 mL, 5 mmol) gave **1n** as a yellowish oil (0.40 g, 2.0 mmol, 40% overall yield). Purification was performed by flash column chromatography (hexane/ethyl acetate 25:1). All characterization data were consistent with those reported.<sup>2</sup>

<sup>1</sup>H NMR (500 MHz, Chloroform-*d*)  $\delta$  7.97 – 7.93 (m, 2H), 7.59 – 7.56 (m, 1H), 7.51 – 7.47 (m, 2H), 7.10 (dt, *J* = 15.3, 6.9 Hz, 1H), 6.90 (dt, *J* = 15.4, 1.5 Hz, 1H), 2.35 (q, *J* = 7.0 Hz, 2H), 1.58 – 1.27 (m, 10H), 0.96 (t, *J* = 7.3 Hz, 3H).

(*E*)-chalcone (**1q**)

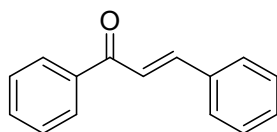

Following procedure A, benzaldehyde (0.52 mL, 5 mmol) and acetophenone (0.73 mL, 6 mmol, 1.2 equiv.) gave **1q** as a yellow solid (1.79 g, 4.30 mmol, 86% overall yield). All characterization data were consistent with those reported.<sup>12</sup>

<sup>1</sup>H NMR (500 MHz, Chloroform-*d*)  $\delta$  8.02 (s, 2H), 7.80 (s, 1H), 7.65 (s, 2H), 7.59 (s, 1H), 7.51 (s, 3H), 7.42 (s, 3H).

(*E*)-*N*-butylhex-2-enamide (**1r**)

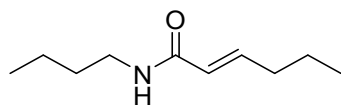

Following procedure C, trans-2-hexenoic acid (0.57 g, 5 mmol), n-butylamine (0.44 g, 6 mmol), dicyclohexylcarbodiimide (1.24 g, 6 mmol) and 4-Dimethylaminopyridine (0.06 g, 0.5 mmol) gave **1r** as a white solid (0.38 g, 2.25 mmol, 45% yield). All characterization data were consistent with those reported.<sup>13</sup>

<sup>1</sup>H NMR (500 MHz, Chloroform-*d*)  $\delta$  6.82 (dt, *J* = 15.0, 7.0 Hz, 1H), 5.75 (dt, *J* = 15.3, 1.7 Hz, 1H), 5.48 (s, 1H), 3.32 (td, *J* = 7.2, 5.9 Hz, 2H), 2.15 (m, 2H), 1.53 – 1.45 (m, 4H), 1.39 – 1.35 (m, 2H), 0.93 (t, *J* = 7.4 Hz, 6H).

### 3. Optimization of the reaction conditions

#### Initial procedure

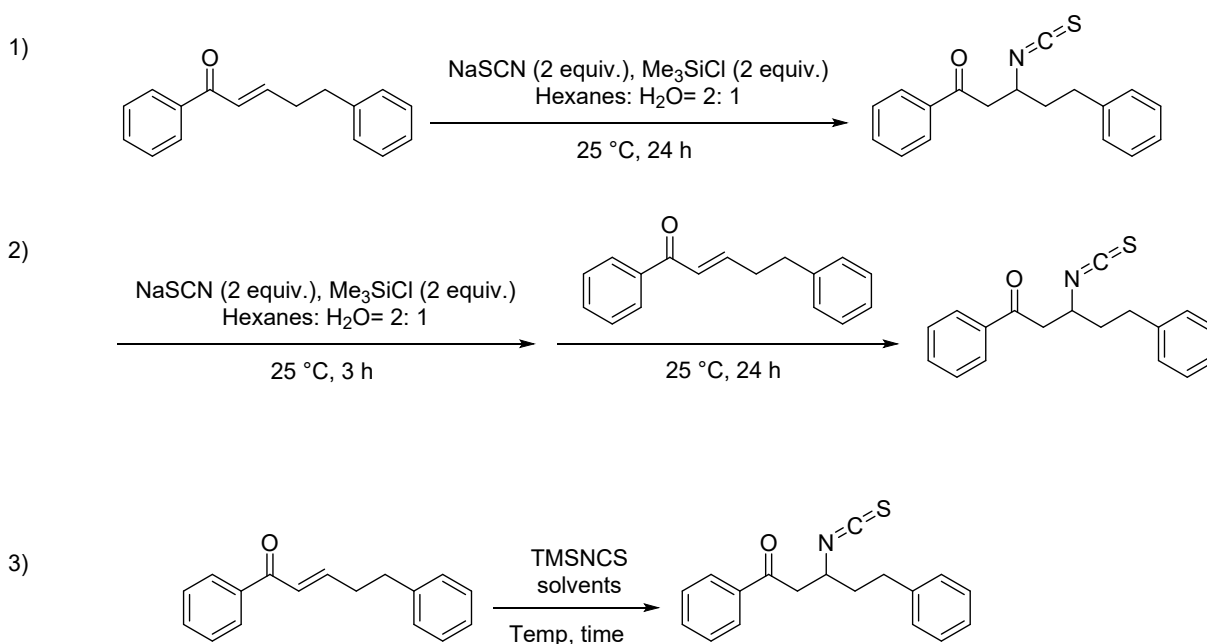

**Figure S1** Initial procedures

Procedure 1: to a round-bottom flask, sodium thiocyanate (2.0 equiv.) and trimethylsilyl chloride (2.0 equiv.) were dissolved in a mixture of hexanes and water, then (*E*)-1,5-diphenylpent-2-en-1-one (**1a**) was added. The resulting mixture was stirred at 25 °C for 24 hours.

Procedure 2: to a round-bottom flask, sodium thiocyanate (2.0 equiv.) in water, trimethylsilyl chloride (2.0 equiv.) in hexanes, mixed these two solutions and stirred for 3 hours at 25 °C, (*E*)-1,5-diphenylpent-2-en-1-one (**1a**) was added and stirred at 25°C for 24 hours.

Procedure 3: to a round-bottom flask, (trimethylsilyl)isothiocyanate and (*E*)-1,5-diphenylpent-2-en-1-one (**1a**) were dissolved into solvents, then stirred to give 1,5-diphenyl-3-thiocyanatopentan-1-one (**2a**).

Optimization Table S1

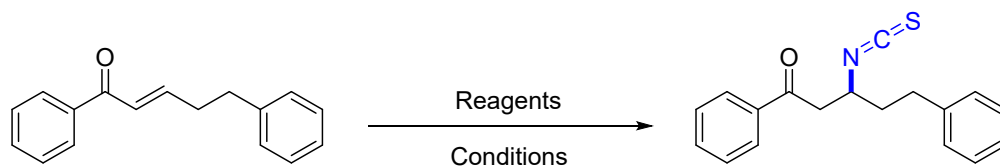

| Entry | Reagents            | Solvents                                     | Temperature<br>(°C) | Time<br>(h)      | Yield <sup>a</sup><br>(%) |
|-------|---------------------|----------------------------------------------|---------------------|------------------|---------------------------|
| 1     | NaSCN (5 equiv.)    | Hexanes: H <sub>2</sub> O (2:1)              | 25                  | 24 <sup>b</sup>  | 0                         |
| 2     | TMSCl & NaSCN       | Hexanes: H <sub>2</sub> O (2:1)              | 25                  | 24 <sup>b</sup>  | 90                        |
| 3     | TMSCl & NaSCN       | Hexanes: H <sub>2</sub> O (2:1)              | 25                  | 27 <sup>c</sup>  | 96                        |
| 4     | TMSCl & NaSCN       | Hexanes: EtOH (2:1)                          | 25                  | 27 <sup>c</sup>  | 99                        |
| 5     | TMSNCS (5 equiv.)   | Hexanes: EtOH (2:1)                          | 25                  | 27 <sup>d</sup>  | 95                        |
| 6     | TMSNCS (5 equiv.)   | Hexanes: EtOH (2:1)                          | 25                  | 6 <sup>d</sup>   | 98                        |
| 7     | TMSNCS (5 equiv.)   | Hexanes: EtOH (2:1)                          | 25                  | 3 <sup>d</sup>   | 93                        |
| 8     | TMSNCS (5 equiv.)   | Hexanes: EtOH (2:1)                          | 25                  | 1.5 <sup>d</sup> | 100                       |
| 9     | TMSNCS (5 equiv.)   | Hexanes                                      | 25                  | 1.5              | 48                        |
| 10    | TMSNCS (5 equiv.)   | Hexanes: EtOH (2:1)                          | 0                   | 1.5              | 100                       |
| 11    | TMSNCS (5 equiv.)   | CH <sub>2</sub> Cl <sub>2</sub> : EtOH (2:1) | 0                   | 1.5              | 100                       |
| 12    | TMSNCS (5 equiv.)   | THF: EtOH (2:1)                              | 0                   | 1.5              | 57                        |
| 13    | TMSNCS (5 equiv.)   | Octanol                                      | 0                   | 6                | 0                         |
| 14    | TMSNCS (5 equiv.)   | EtOH                                         | 0                   | 6                | 100                       |
| 15    | TMSNCS (5 equiv.)   | EtOH                                         | 0                   | 3                | 100                       |
| 16    | TMSNCS (5 equiv.)   | EtOH                                         | 0                   | 1.5              | 100                       |
| 17    | TMSNCS (2 equiv.)   | EtOH                                         | 0                   | 0.5              | 100 (90) <sup>e</sup>     |
| 18    | TMSNCS (1.1 equiv.) | EtOH                                         | 0                   | 0.5              | 80                        |
| 19    | TMSNCS (1.1 equiv.) | EtOH                                         | 0                   | 6                | 95                        |

<sup>a</sup> Reactions were run on 0.15 mmol scale. Yield was estimated by <sup>1</sup>H NMR of the crude mixture with dibenzyl ether as internal standard. <sup>b</sup> Reaction condition: Procedure 1; <sup>c</sup> Reaction condition: Procedure 2; <sup>d</sup> Reaction condition: Procedure 3. <sup>e</sup> isolated yield.

## 4. Synthesis and characterization data of isothiocyanation products

### 4.1 General procedure

In a round-bottom flask, (trimethylsilyl)isothiocyanate (0.3 mmol, 2.0 equiv.) and an enone (0.15 mmol, 1.0 equiv.) were dissolved into 95% ethanol (1.5 mL) or 95% ethanol/dichloromethane (1.5 mL, 2/1), and the mixture was then stirred 30 mins to 6 hours at 0 °C. Then, the solvents were evaporated under reduced pressure and the resulting crude mixture was purified by flash column chromatography (hexanes/ethyl acetate) to afford the desired products.

### 4.2 Spectral identification of isothiocyanate vs thiocyanate isomers

There is great selectivity for the isothiocyanato group in products. The combined NMR and FTIR can show the difference between isothiocyanate and thiocyanate.<sup>14-16</sup> From NMR, we can identify the ratio between isothiocyanato- and thiocyanato- product. Figure S2 shows the NMR difference between ethyl isothiocyanate and ethyl thiocyanate, where the chemical shift of the -CH<sub>2</sub> group is 3.00 ppm for ethyl thiocyanate and 3.58 ppm for ethyl isothiocyanate, in line with the increased electronegativity of nitrogen. For the reaction starting with but-3-en-2-one, the crude ratio between 4-isothiocyanatobutan-2-one (**2p**) and 4-thiocyanatobutan-2-one is almost 1:1 which is shown in Figure S3, and we can obtain the pure **2p** of 55% yield. For the reaction started with 3-cyclohexyl-1-phenylprop-2-en-1-one (**1j**), the crude ratio between 3-cyclohexyl-3-isothiocyanato-1-phenylpropan-1-one (**2j**) and 3-cyclohexyl-3-thiocyanato-1-phenylpropan-1-one is about 86:14 which is shown in Figure S4, while after column only **2j** is detected (Figure S5). Purification usually reduces the amount of thiocyanato- product in our system. There is a high selectivity for isothiocyanates from the results of the other substrates.

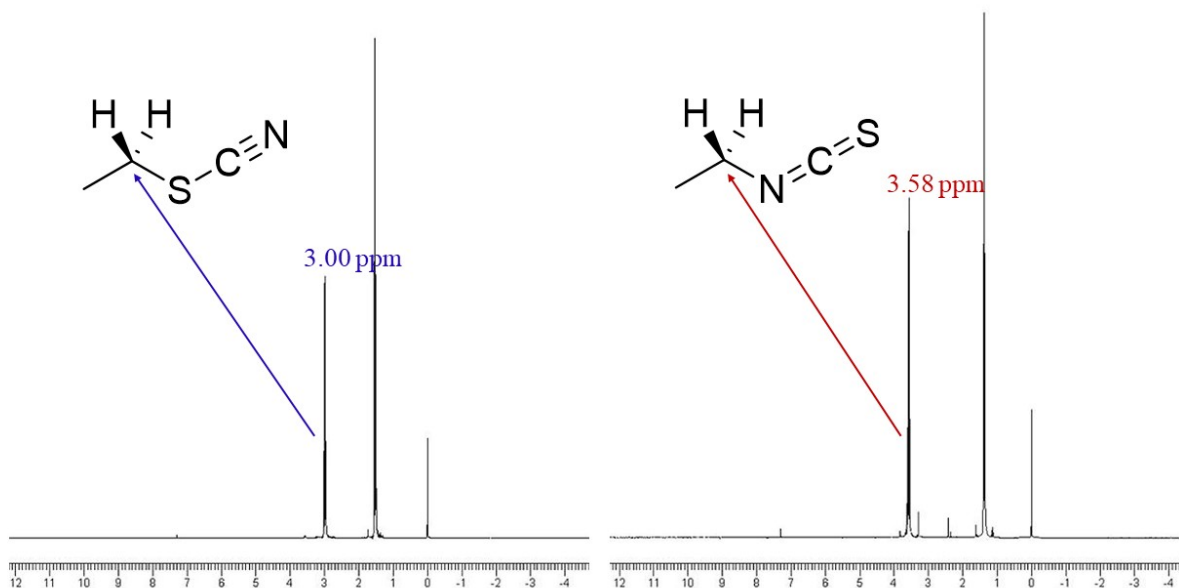

Figure S2 NMR of ethyl isothiocyanate and ethyl thiocyanate<sup>17, 18</sup>

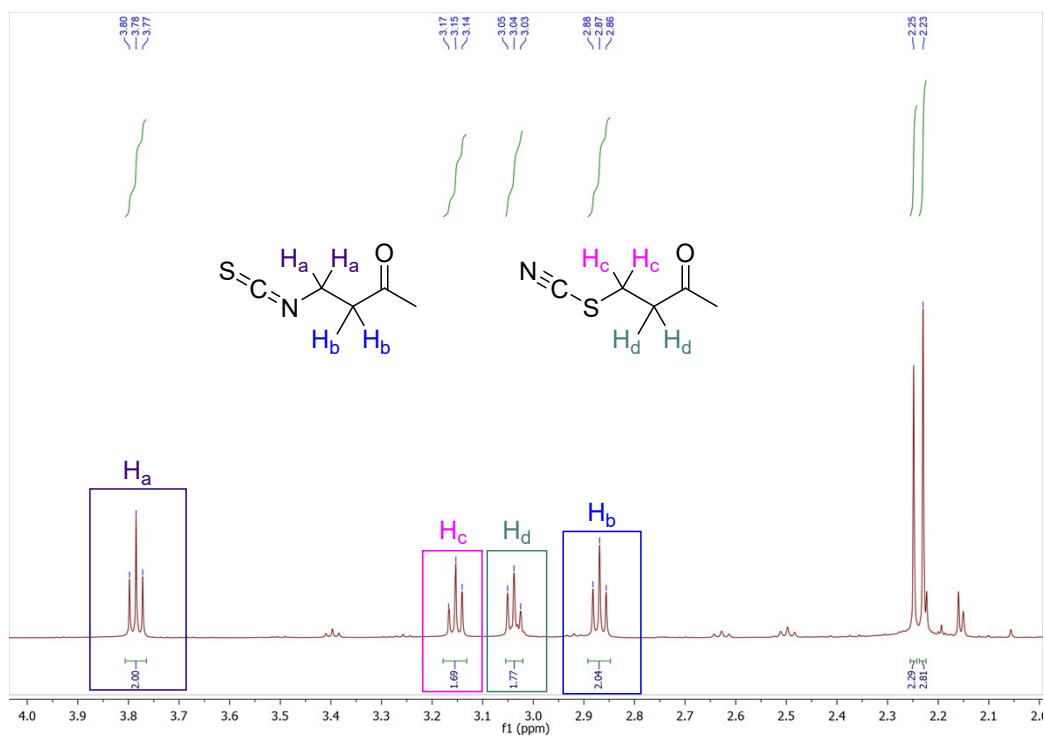

**Figure S3** Crude NMR of 4-isothiocyanatobutan-2-one (**2p**) and 4-thiocyanatobutan-2-one (**2p'**)

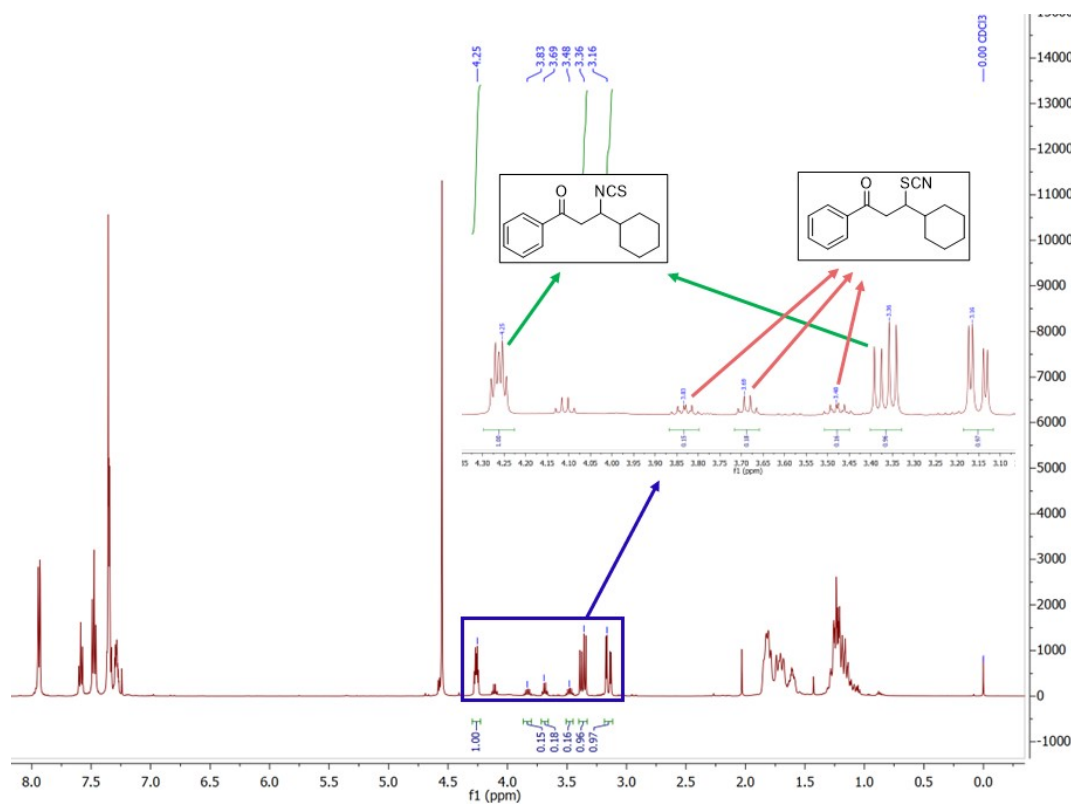

**Figure S4** Crude NMR of 3-cyclohexyl-3-isothiocyanato-1-phenylpropan-1-one (**2j**) and 3-cyclohexyl-3-thiocyanato-1-phenylpropan-1-one (**2j'**)

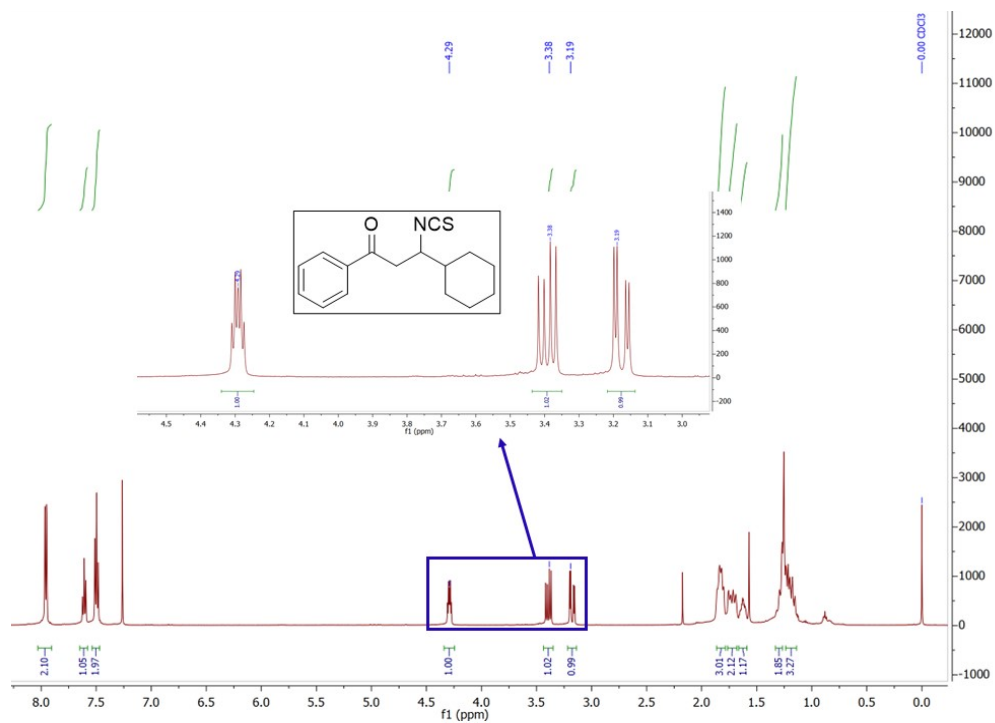

**Figure S5** NMR after column of 3-cyclohexyl-3-isothiocyanato-1-phenylpropan-1-one (**2j**)

FTIR showed that the peak at  $2098\text{ cm}^{-1}$  is broad for **2a** (Figure S6) which matches the lower wavenumber and broad signal of isothiocyanates, compared with the IR spectra of ethyl isothiocyanate and ethyl thiocyanate and the wavenumber from the literature (Figure S7).<sup>19, 20</sup>

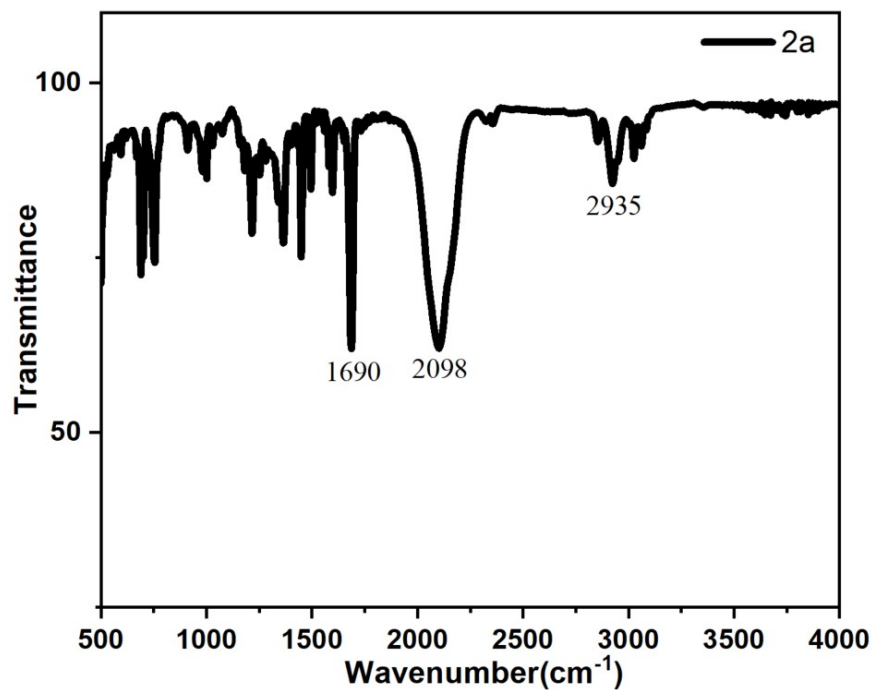

**Figure S6** FTIR of **2a**

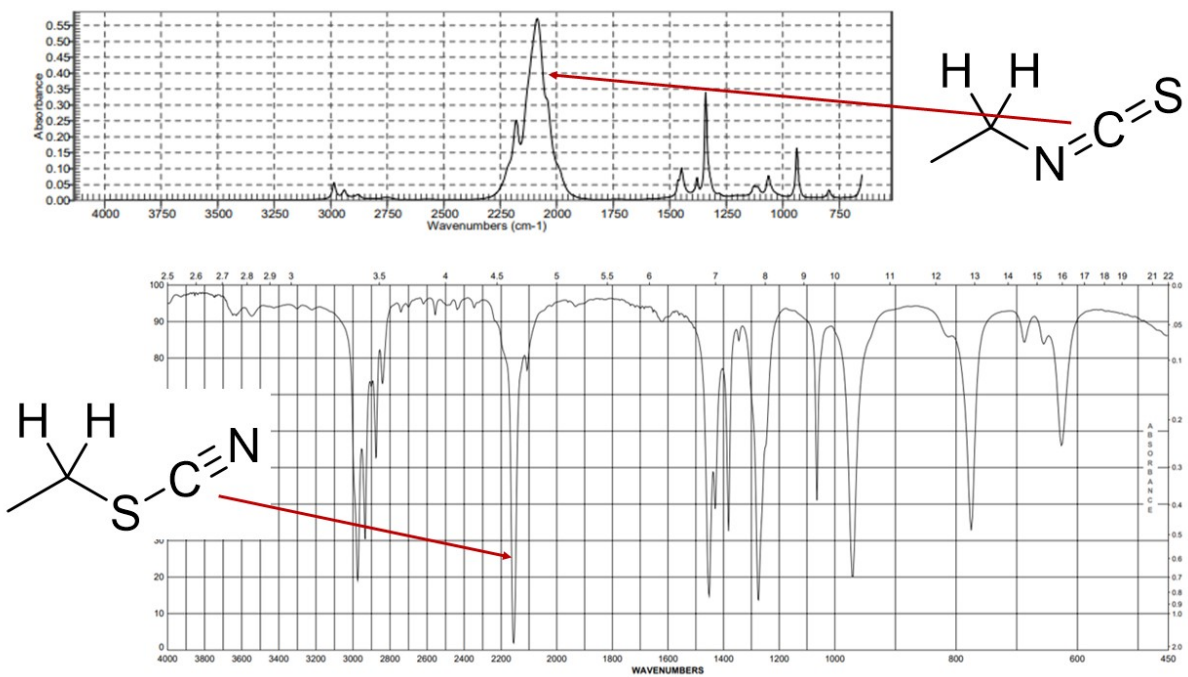

**Figure S7** IR of ethyl isothiocyanate and ethyl thiocyanate (*Spectral Data were obtained from Sigma-Aldrich*)

#### 4.3 Characterization data of isothiocyanation products and derivatives

##### 3-isothiocyanato-1,5-diphenylpentan-1-one (2a)

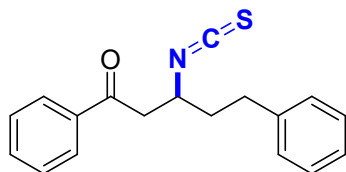

Molecular formula: C<sub>18</sub>H<sub>17</sub>NOS

MW = 295.40 g/mol

Following the general procedure, enone **1a** (0.15 mmol, 35.5 mg) and TMSNCS (0.3 mmol, 42  $\mu$ L) gave the product **2a**. Purification by flash column chromatography (hexane/ethyl acetate 20/1) gave the title compound (40.0 mg, 90%) as a yellow solid.

<sup>1</sup>H NMR (500 MHz, Chloroform-d)  $\delta$  7.93 – 7.90 (m, 2H), 7.62 – 7.57 (m, 1H), 7.50 – 7.45 (m, 2H), 7.33 – 7.28 (m, 2H), 7.24 – 7.19 (m, 3H), 4.37 (m, 1H), 3.41 (dd,  $J$  = 17.3, 7.1 Hz, 1H), 3.16 (dd,  $J$  = 17.3, 5.8 Hz, 1H), 2.92 (m, 1H), 2.78 (m, 1H), 2.09 – 1.96 (m, 2H).

<sup>13</sup>C NMR (126 MHz, Chloroform-d)  $\delta$  195.88, 140.12, 136.19, 133.79, 132.37, 128.84, 128.69, 128.49, 128.10, 126.42, 53.40, 43.97, 37.36, 32.32.

IR (cm<sup>-1</sup>) 2935, 2098 (broad), 1690.

HRMS (ESI+) calculated for C<sub>18</sub>H<sub>18</sub>NOS [M+H]<sup>+</sup> 296.1104, found 296.1107.

##### 3-isothiocyanato-5-phenyl-1-(p-tolyl)pentan-1-one (2b)

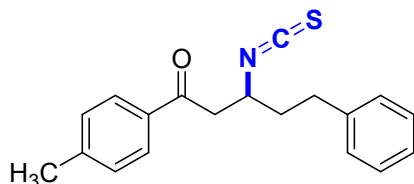

Molecular formula: C<sub>19</sub>H<sub>19</sub>NOS

MW = 309.43 g/mol

Following the general procedure, enone **1b** (0.15 mmol, 37.5 mg) and TMSNCS (0.3 mmol, 42  $\mu$ L) gave the product **2b**. Purification by flash column chromatography (hexane/ethyl acetate 20/1) gave the title compound (42.6 mg, 92%) as a light-yellow oil.

<sup>1</sup>H NMR (500 MHz, Chloroform-d)  $\delta$  7.81 – 7.76 (m, 2H), 7.27 (dd,  $J$  = 8.3, 6.9 Hz, 2H), 7.22 (d,  $J$  = 7.9 Hz, 2H), 7.19 (d,  $J$  = 7.4 Hz, 3H), 4.31 (m, 1H), 3.32 (dd,  $J$  = 17.3, 7.1 Hz, 1H), 3.08 (dd,  $J$  = 17.3, 5.8 Hz, 1H), 2.87 (ddd,  $J$  = 14.2, 9.0, 5.2 Hz, 1H), 2.73 (ddd,  $J$  = 13.6, 9.0, 7.3 Hz, 1H), 2.38 (s, 3H), 2.03 – 1.92 (m, 2H).

<sup>13</sup>C NMR (126 MHz, Chloroform-d)  $\delta$  195.25, 144.70, 140.16, 133.81, 132.37, 129.49, 128.65, 128.46, 128.21, 126.37, 53.53, 43.84, 37.38, 32.32, 21.70.



IR (cm<sup>-1</sup>) 2930, 2918 (broad), 2093, 1698, 1453.

HRMS (ESI+) calculated for C<sub>19</sub>H<sub>20</sub>NOS [M+H]<sup>+</sup> 310.1260, found 310.1262.

### 3-isothiocyanato-1-(4-methoxyphenyl)-5-phenylpentan-1-one (2c)

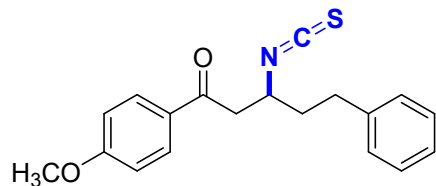

Molecular formula: C<sub>19</sub>H<sub>19</sub>NO<sub>2</sub>S

MW = 325.43 g/mol

Following the general procedure, enone **1c** (0.15 mmol, 40.0 mg) and TMSNCS (0.3 mmol, 42 μL) gave the product **2c**. Purification by flash column chromatography (hexane/ethyl acetate 20/1) gave the title compound (42.4 mg, 87%) as a yellowish oil.

<sup>1</sup>H NMR (500 MHz, Chloroform-d) δ 7.91 – 7.87 (d, *J* = 9.0 Hz, 2H), 7.33 – 7.27 (m, 2H), 7.23 – 7.19 (m, 3H), 6.95 – 6.92 (m, 2H), 4.35 (m, 1H), 3.87 (s, 3H), 3.36 (dd, *J* = 17.0, 7.0 Hz, 1H), 3.11 (dd, *J* = 17.0, 5.9 Hz, 1H), 2.91 (m, 1H), 2.77 (m, 1H), 2.09 – 1.95 (m, 2H).

<sup>13</sup>C NMR (126 MHz, Chloroform-d) δ 194.11, 164.01, 140.19, 132.27, 130.44, 129.37, 128.65, 128.47, 126.37, 113.98, 55.56, 53.66, 43.59, 37.40, 32.34.

IR (cm<sup>-1</sup>) 2920, 2100 (broad), 1702, 1456, 1257.

HRMS (ESI+) calculated for C<sub>19</sub>H<sub>20</sub>NO<sub>2</sub>S [M+H]<sup>+</sup> 326.1209, found 326.1212.

### 4-(3-isothiocyanato-5-phenylpentanoyl)benzonitrile (2d)

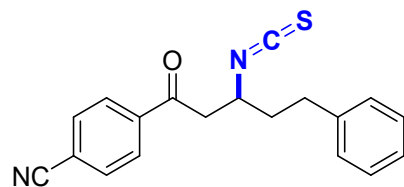

Molecular formula: C<sub>19</sub>H<sub>16</sub>N<sub>2</sub>OS

MW = 320.41 g/mol

Following the general procedure, enone **1d** (0.15 mmol, 39.2 mg) and TMSNCS (0.3 mmol, 42 μL) in ethanol/dichloromethane gave the product **2d**. Purification by flash column chromatography (hexane/ethyl acetate 20/1) gave the title compound (42.2 mg, 88%) as a light-yellow oil.

<sup>1</sup>H NMR (500 MHz, Chloroform-d) δ 7.61 (dd, *J* = 1.7, 0.8 Hz, 1H), 7.33 – 7.28 (m, 2H), 7.25 – 7.19 (m, 4H), 6.57 (dd, *J* = 3.6, 1.7 Hz, 1H), 4.31 (m, 1H), 3.29 (dd, *J* = 16.5, 7.6 Hz, 1H), 3.02 (dd, *J* = 16.5, 5.7 Hz, 1H), 2.90 (dt, *J* = 14.2, 7.2 Hz, 1H), 2.76 (dt, *J* = 13.9, 8.2 Hz, 1H), 2.06 – 1.96 (m, 2H).

$^{13}\text{C}$  NMR (126 MHz, Chloroform- $d$ )  $\delta$  184.75, 152.27, 147.00, 140.04, 132.55, 128.68, 128.47, 126.42, 117.99, 117.63, 112.71, 53.30, 43.77, 37.41, 32.24.

IR ( $\text{cm}^{-1}$ ) 2960, 2260 (w), 2100 (broad), 1744.

HRMS (ESI+) calculated for  $\text{C}_{19}\text{H}_{17}\text{N}_2\text{OS}$   $[\text{M}+\text{H}]^+$  321.1056, found 321.1064.

### 1-(4-fluorophenyl)-3-isothiocyanato-5-phenylpentan-1-one (2e)

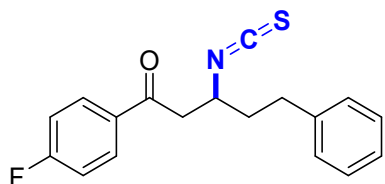

Molecular formula:  $\text{C}_{18}\text{H}_{16}\text{FNOS}$

MW = 313.39 g/mol

Following the general procedure, enone **1e** (0.15 mmol, 38.0 mg) and TMSNCS (0.3 mmol, 42  $\mu\text{L}$ ) gave the product **2e**. Purification by flash column chromatography (hexane/ethyl acetate 20/1) gave the title compound (43.2 mg, 92%) as a yellowish oil.

$^1\text{H}$  NMR (500 MHz, Chloroform- $d$ )  $\delta$  7.96 – 7.89 (m, 2H), 7.30 (t,  $J$  = 7.6 Hz, 2H), 7.22 – 7.18 (m, 3H), 7.16 – 7.08 (m, 2H), 4.39 – 4.28 (m, 1H), 3.36 (dd,  $J$  = 17.3, 7.2 Hz, 1H), 3.10 (dd,  $J$  = 17.3, 5.8 Hz, 1H), 2.89 (m, 1H), 2.76 (m, 1H), 2.01 (m, 2H).

$^{13}\text{C}$  NMR (126 MHz, Chloroform- $d$ )  $\delta$  194.12, 166.10 ( $J$  = 256.30 Hz), 140.11, 132.68, 132.66, 132.51, 130.84 ( $J$  = 9.85 Hz), 128.59 ( $J$  = 27.15 Hz), 126.46, 116.02 ( $J$  = 22.01 Hz), 53.38, 43.86, 37.32, 32.30.

$^{19}\text{F}$  NMR (283 MHz, Chloroform- $d$ )  $\delta$  -105.36.

IR ( $\text{cm}^{-1}$ ) 2930, 2097 (broad), 1702, 1683.

HRMS (ESI+) calculated for  $\text{C}_{18}\text{H}_{17}\text{FNOS}$   $[\text{M}+\text{H}]^+$  314.1009, found 314.1010.

### 3-isothiocyanato-5-phenyl-1-(4-(trifluoromethyl)phenyl)pentan-1-one (2f)

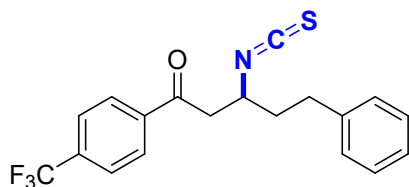

Molecular formula:  $\text{C}_{19}\text{H}_{16}\text{F}_3\text{NOS}$

MW = 363.40 g/mol

Following the general procedure, enone **1f** (0.15 mmol, 45.6 mg) and TMSNCS (0.3 mmol, 42  $\mu\text{L}$ ) in ethanol/dichloromethane gave the product **2f**. Purification by flash column chromatography (hexane/ethyl acetate 20/1) gave the title compound (49 mg, 90%) as a yellow solid.

$^1\text{H}$  NMR (500 MHz, Chloroform- $d$ )  $\delta$  7.94 (dd,  $J$  = 8.2, 1.4 Hz, 2H), 7.65 – 7.60 (m, 1H), 7.50 (t,  $J$  = 7.8 Hz, 2H), 7.37 – 7.31 (m, 2H), 7.24 (d,  $J$  = 1.9 Hz, 2H), 4.45 – 4.34 (m, 1H), 3.44 (dd,  $J$  = 17.3, 7.3 Hz, 1H), 3.19 (dd,  $J$  = 17.3, 5.8 Hz, 1H), 2.99 – 2.92 (m, 1H), 2.81 (m, 1H), 2.13 – 2.00 (m, 2H).

$^{13}\text{C}$  NMR (126 MHz, Chloroform- $d$ )  $\delta$  195.66, 140.13, 136.24, 133.75, 132.54, 128.83, 128.68, 128.48, 128.09, 126.41, 53.44, 43.96, 37.36, 32.32.

$^{19}\text{F}$  NMR (283 MHz, Chloroform- $d$ )  $\delta$  -63.17.

IR ( $\text{cm}^{-1}$ ) 2970, 2103 (broad), 1737, 1420.

HRMS (ESI+) calculated for  $\text{C}_{19}\text{H}_{17}\text{F}_3\text{NOS}$   $[\text{M}+\text{H}]^+$  364.0977, found 364.0975.

### 3-isothiocyanato-1-(4-nitrophenyl)-5-phenylpentan-1-one (2g)

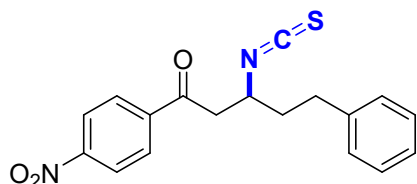

Molecular formula:  $\text{C}_{18}\text{H}_{16}\text{N}_2\text{O}_3\text{S}$

MW = 340.40 g/mol

Following the general procedure, enone **1g** (0.15 mmol, 42.17 mg) and TMSNCS (0.3 mmol, 42  $\mu\text{L}$ ) in ethanol/dichloromethane gave the product **2g**. Purification by flash column chromatography (hexane/ethyl acetate 20/1) gave the title compound (47.9 mg, 94%) as a yellow solid.

$^1\text{H}$  NMR (500 MHz, Chloroform- $d$ )  $\delta$  8.35 – 8.32 (m, 2H), 8.09 – 8.06 (m, 2H), 7.34 – 7.30 (m, 2H), 7.25 – 7.21 (m, 3H), 4.40 – 4.34 (m, 1H), 3.46 (dd,  $J$  = 17.5, 7.5 Hz, 1H), 3.18 (dd,  $J$  = 17.5, 5.3 Hz, 1H), 2.94 (dt,  $J$  = 14.0, 7.0 Hz, 1H), 2.80 (dt,  $J$  = 14.0, 8.2 Hz, 1H), 2.09 – 2.03 (m, 2H).

$^{13}\text{C}$  NMR (126 MHz, Chloroform- $d$ )  $\delta$  194.33, 150.79, 140.42, 139.88, 133.39, 129.17, 128.76, 128.48, 126.54, 124.08, 53.08, 44.48, 37.27, 32.22.

IR ( $\text{cm}^{-1}$ ) 2931, 2103 (broad), 1690, 1540.

HRMS (ESI+) calculated for  $\text{C}_{18}\text{H}_{17}\text{N}_2\text{O}_3\text{S}$   $[\text{M}+\text{H}]^+$  341.0954, found 341.0960.

### 1-(furan-2-yl)-3-isothiocyanato-5-phenylpentan-1-one (2h)

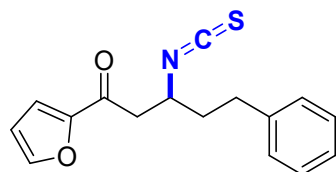

Molecular formula: C<sub>16</sub>H<sub>15</sub>NO<sub>2</sub>S

MW = 285.36 g/mol

Following the general procedure, enone **1h** (0.15 mmol, 34.0 mg) and TMSNCS (0.3 mmol, 42  $\mu$ L) gave the product **2h**. Purification by flash column chromatography (hexane/ethyl acetate 20/1) gave the title compound (38.5 mg, 90%) as a yellowish solid.

<sup>1</sup>H NMR (500 MHz, Chloroform-d)  $\delta$  7.61 (dd,  $J$  = 1.7, 0.8 Hz, 1H), 7.33 – 7.28 (m, 2H), 7.24 (dd,  $J$  = 3.6, 0.8 Hz, 1H), 7.23 – 7.20 (m, 3H), 6.57 (dd,  $J$  = 3.6, 1.7 Hz, 1H), 4.35 – 4.26 (m, 1H), 3.29 (dd,  $J$  = 16.5, 7.6 Hz, 1H), 3.02 (dd,  $J$  = 16.5, 5.7 Hz, 1H), 2.90 (dt,  $J$  = 14.2, 7.2 Hz, 1H), 2.77 (dt,  $J$  = 14.0, 8.2 Hz, 1H), 2.02 (dt,  $J$  = 8.2, 6.9 Hz, 2H).

<sup>13</sup>C NMR (126 MHz, Chloroform-d)  $\delta$  184.77, 152.25, 147.00, 140.03, 132.56, 128.68, 128.47, 126.41, 118.00, 112.71, 53.30, 43.77, 37.41, 32.23.

IR (cm<sup>-1</sup>) 2930, 2093 (broad), 1675, 1330, 750.

HRMS (ESI+) calculated for C<sub>16</sub>H<sub>16</sub>NO<sub>2</sub>S [M+H]<sup>+</sup> 286.0896, found 286.0893.

### 3-isothiocyanato-5-phenyl-1-(pyridin-2-yl)pentan-1-one (2i)

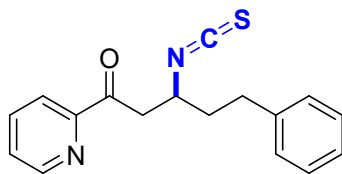

Molecular formula: C<sub>17</sub>H<sub>16</sub>N<sub>2</sub>OS

MW = 296.39 g/mol

Following the general procedure, enone **1i** (0.15 mmol, 35.6 mg) and TMSNCS (0.3 mmol, 42  $\mu$ L) gave the product **2i**. Purification by flash column chromatography (hexane/ethyl acetate 15/1) gave the title compound (40 mg, 90%) as a yellow solid.

<sup>1</sup>H NMR (500 MHz, Chloroform-d)  $\delta$  8.35 – 8.32 (m, 2H), 8.09 – 8.06 (m, 2H), 7.34 – 7.30 (m, 2H), 7.23 (ddt,  $J$  = 8.4, 3.8, 1.8 Hz, 3H), 4.37 (tt,  $J$  = 7.4, 5.4 Hz, 1H), 3.46 (dd,  $J$  = 17.5, 7.5 Hz, 1H), 3.18 (dd,  $J$  = 17.5, 5.3 Hz, 1H), 2.94 (dt,  $J$  = 14.0, 7.0 Hz, 1H), 2.80 (dt,  $J$  = 14.0, 8.2 Hz, 1H), 2.09 – 2.03 (m, 2H).

<sup>13</sup>C NMR (126 MHz, Chloroform-d)  $\delta$  194.33, 150.67, 140.42, 139.87, 133.40, 129.17, 128.76, 128.48, 126.53, 126.28, 124.08, 53.08, 44.48, 37.27, 32.22.

IR (cm<sup>-1</sup>) 2930, 2100 (broad), 1691, 1350.

HRMS (ESI+) calculated for C<sub>17</sub>H<sub>16</sub>N<sub>2</sub>OS [M+2H]<sup>2+</sup> 149.0564, found 149.0575.

### 3-cyclohexyl-3-isothiocyanato-1-phenylpropan-1-one (2j)

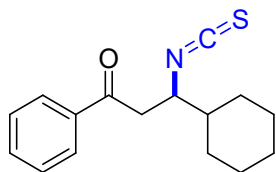

Molecular formula: C<sub>16</sub>H<sub>19</sub>NOS

MW = 273.39 g/mol

Following the general procedure, enone **1j** (0.15 mmol, 32.2 mg) and TMSNCS (0.3 mmol, 42  $\mu$ L) in ethanol/dichloromethane gave the product **2j**. Purification by flash column chromatography (hexane/ethyl acetate 15/1) gave the title compound (36 mg, 88%) as a yellowish oil.

<sup>1</sup>H NMR (500 MHz, Chloroform-d)  $\delta$  8.00 – 7.92 (m, 2H), 7.61 (td,  $J$  = 7.2, 1.3 Hz, 1H), 7.50 (t,  $J$  = 7.8 Hz, 2H), 4.29 (dt,  $J$  = 8.7, 4.6 Hz, 1H), 3.39 (dd,  $J$  = 17.2, 8.2 Hz, 1H), 3.18 (dd,  $J$  = 17.2, 4.7 Hz, 1H), 1.86 – 1.80 (m, 3H), 1.78 – 1.67 (m, 2H), 1.66 – 1.59 (m, 1H), 1.33 – 1.14 (m, 5H).

<sup>13</sup>C NMR (126 MHz, Chloroform-d)  $\delta$  196.08, 136.33, 133.72, 131.03, 128.83, 128.14, 58.75, 42.42, 30.25, 27.81, 25.98, 25.77.

IR (cm<sup>-1</sup>) 2935, 2103 (broad), 1685.

HRMS (ESI+) calculated for C<sub>16</sub>H<sub>20</sub>NOS [M+H]<sup>+</sup> 274.1260, found 274.1265.

### 3-isothiocyanato-4-methyl-1-phenylpentan-1-one (2k)

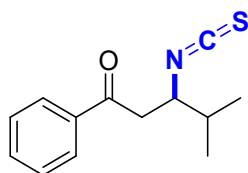

Molecular formula: C<sub>13</sub>H<sub>15</sub>NOS

MW = 233.33 g/mol

Following the general procedure, enone **1k** (0.15 mmol, 26.2 mg) and TMSNCS (0.3 mmol, 42  $\mu$ L) gave the product **2k**. Purification by flash column chromatography (hexane/ethyl acetate 30/1) gave the title compound (33 mg, 95%) as a yellowish oil.

<sup>1</sup>H NMR (500 MHz, Chloroform-d)  $\delta$  7.99 – 7.92 (m, 2H), 7.64 – 7.58 (m, 1H), 7.53 – 7.43 (m, 2H), 4.32 (dt,  $J$  = 8.6, 4.4 Hz, 1H), 3.39 (dd,  $J$  = 17.2, 8.3 Hz, 1H), 3.13 (dd,  $J$  = 17.2, 4.6 Hz, 1H), 1.99 (hept,  $J$  = 6.7, 4.3 Hz, 1H), 1.09 (d,  $J$  = 6.8 Hz, 3H), 1.05 (d,  $J$  = 6.8 Hz, 3H).

<sup>13</sup>C NMR (126 MHz, Chloroform-d)  $\delta$  196.01, 136.31, 133.75, 131.34, 128.84, 128.14, 59.37, 41.52, 33.03, 19.91, 17.10.

IR (cm<sup>-1</sup>) 2920, 2093, 1685, 1450.

HRMS (ESI+) calculated for C<sub>13</sub>H<sub>16</sub>NOS [M+H]<sup>+</sup> 234.0947, found 234.0950.

### 3-isothiocyanato-4,4-dimethyl-1-phenylpentan-1-one (2l)

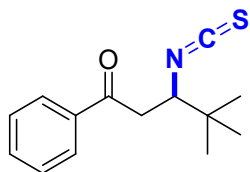

Molecular formula: C<sub>14</sub>H<sub>17</sub>NOS

MW = 247.36 g/mol

Following the general procedure, enone **1l** (0.15 mmol, 28.4 mg) and TMSNCS (0.3 mmol, 42 μL) gave the product **2l**. Purification by flash column chromatography (hexane/ethyl acetate 35/1) gave the title compound (35.5 mg, 96%) as a pale oil.

<sup>1</sup>H NMR (500 MHz, Chloroform-d) δ 7.98 – 7.94 (m, 2H), 7.60 (tt, *J* = 7.0, 1.3 Hz, 1H), 7.53 – 7.47 (m, 2H), 4.19 (dd, *J* = 9.9, 2.6 Hz, 1H), 3.35 (dd, *J* = 17.0, 9.9 Hz, 1H), 3.10 (dd, *J* = 17.0, 2.6 Hz, 1H), 1.06 (s, 9H).

<sup>13</sup>C NMR (126 MHz, Chloroform-d) δ 196.28, 136.44, 133.70, 128.82, 128.17, 63.06, 39.50, 35.66, 26.29.

IR (cm<sup>-1</sup>) 2970, 2097 (broad), 1689, 1450.

HRMS (ESI+) calculated for C<sub>14</sub>H<sub>18</sub>NOS [M+H]<sup>+</sup> 248.1104, found 248.1105.

### 3-isothiocyanato-1-phenylheptan-1-one (2m)

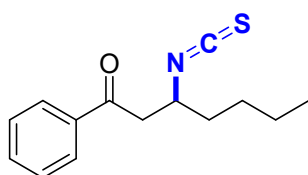

Molecular formula: C<sub>14</sub>H<sub>17</sub>NOS

MW = 247.36 g/mol

Following the general procedure, enone **1m** (0.15 mmol, 30.3 mg) and TMSNCS (0.3 mmol, 42 μL) gave the product **2m**. Purification by flash column chromatography (hexane/ethyl acetate 20/1) gave the title compound (36.9 mg, 90%) as a yellowish oil.

<sup>1</sup>H NMR (500 MHz, Chloroform-d) δ 8.00 – 7.93 (m, 2H), 7.67 – 7.61 (m, 1H), 7.56 – 7.47 (m, 2H), 4.40 (tt, *J* = 7.1, 5.7 Hz, 1H), 3.43 (dd, *J* = 17.2, 7.1 Hz, 1H), 3.19 (dd, *J* = 17.2, 5.7 Hz, 1H), 1.77 – 1.69 (m, 2H), 1.32 (h, *J* = 2.9, 2.2 Hz, 4H), 0.93 – 0.91 (m, 3H).

$^{13}\text{C}$  NMR (126 MHz, Chloroform- $d$ )  $\delta$  195.90, 136.25, 133.75, 131.38, 128.84, 128.11, 53.97, 43.98, 35.55, 28.14, 22.14, 13.94.

IR ( $\text{cm}^{-1}$ ) 2970, 2097 (broad), 1747, 1448, 1375.

HRMS (ESI+) calculated for  $\text{C}_{14}\text{H}_{18}\text{NOS}$   $[\text{M}+\text{H}]^+$  248.1104, found 248.1103.

### 3-isothiocyanato-1-phenyldecan-1-one (2n)

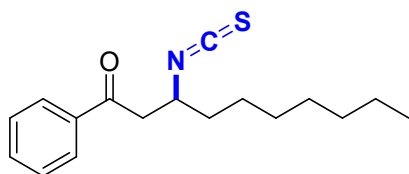

Molecular formula:  $\text{C}_{17}\text{H}_{23}\text{NOS}$

MW = 289.44 g/mol

Following the general procedure, enone **1n** (0.15 mmol, 34.5 mg) and TMSNCS (0.3 mmol, 42  $\mu\text{L}$ ) gave the product **2n**. Purification by flash column chromatography (hexane/ethyl acetate 25/1) gave the title compound (40.4 mg, 93%) as a yellowish oil.

$^1\text{H}$  NMR (500 MHz, Chloroform- $d$ )  $\delta$  7.98 – 7.92 (m, 2H), 7.63 – 7.57 (m, 1H), 7.52 – 7.43 (m, 2H), 4.38 (s, 1H), 3.40 (dd,  $J$  = 17.2, 7.1 Hz, 1H), 3.16 (dd,  $J$  = 17.2, 5.7 Hz, 1H), 1.75 – 1.67 (m, 2H), 1.34 – 1.27 (m, 10H), 0.89 (t,  $J$  = 2.7 Hz, 3H).

$^{13}\text{C}$  NMR (126 MHz, Chloroform- $d$ )  $\delta$  195.91, 136.27, 133.75, 131.44, 128.84, 128.12, 54.00, 43.98, 36.86, 31.74, 29.11, 28.96, 26.04, 22.64, 14.11.

IR ( $\text{cm}^{-1}$ ) 2930, 2135 (broad), 1680, 1450.

HRMS (ESI+) calculated for  $\text{C}_{17}\text{H}_{24}\text{NOS}$   $[\text{M}+\text{H}]^+$  290.1573, found 290.1574.

### 3-isothiocyanatocyclohexan-1-one (2o)

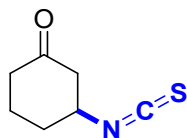

Molecular formula:  $\text{C}_7\text{H}_9\text{NOS}$

MW = 155.22 g/mol

Following the general procedure, cyclohex-2-en-1-one (0.15 mmol, 14.5 mg) and TMSNCS (0.3 mmol, 42  $\mu\text{L}$ ) gave the product **2o**. Purification by flash column chromatography (hexane/ethyl acetate 10/1) gave the title compound (22.8 mg, 98%) as a yellowish solid.

$^1\text{H}$  NMR (500 MHz, Chloroform- $d$ )  $\delta$  4.20 (m, 1H), 2.71 (m, 1H), 2.60 (m, 1H), 2.41 – 2.36 (m, 2H), 2.19 – 1.99 (m, 3H), 1.87 – 1.78 (m, 1H).

$^{13}\text{C}$  NMR (126 MHz, Chloroform- $d$ )  $\delta$  206.31, 133.48, 55.45, 47.60, 40.63, 31.55, 21.37.

IR (cm<sup>-1</sup>) 2084 (broad), 1725,1465.

HRMS (ESI+) calculated for C<sub>7</sub>H<sub>10</sub>NOS [M+H]<sup>+</sup> 156.0478, found 156.0480.

#### 4-isothiocyanatobutan-2-one (2p)

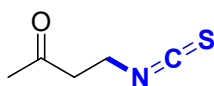

Molecular formula: C<sub>5</sub>H<sub>7</sub>NOS

MW = 129.18 g/mol

Following the general procedure, but-3-en-2-one (0.3 mmol, 21.0 mg) and TMSNCS (0.6 mmol, 84 μL) gave the product **2p**. Purification by flash column chromatography (hexane/ethyl acetate 5/1) gave the title compound (21.2 mg, 55%) as a yellowish solid.

<sup>1</sup>H NMR (500 MHz, Chloroform-d) δ 3.77 (t, *J* = 6.6 Hz, 2H), 2.85 (t, *J* = 6.6 Hz, 2H), 2.22 (s, 3H).

<sup>13</sup>C NMR (126 MHz, Chloroform-d) δ 204.27, 131.60, 42.83, 39.51, 30.13.

IR (cm<sup>-1</sup>) 2927, 2123, 1722, 1440.

HRMS (ESI+) calculated for C<sub>5</sub>H<sub>8</sub>NOS [M+H]<sup>+</sup> 130.0321 found 130.0322.

#### 3-isothiocyanato-1,3-diphenylpropan-1-one (2q)

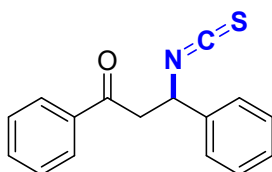

Molecular formula: C<sub>16</sub>H<sub>13</sub>NOS

MW = 267.35 g/mol

Following the general procedure, chalcone (0.3 mmol, 62.5 mg) and TMSNCS (1.5 mmol, 210 μL) gave the product **2q**. Purification by flash column chromatography (hexane/ethyl acetate 10/1) gave the title compound (yield is in range of 6.4-20.0 mg, 8-25%) as a yellowish solid. All characterization data were consistent with those reported.<sup>21</sup>

<sup>1</sup>H NMR (500 MHz, Chloroform-d) δ 7.95 – 7.91 (m, 2H), 7.59 (m, 1H), 7.49 – 7.44 (m, 2H), 7.40 (d, *J* = 4.4 Hz, 4H), 7.36 – 7.33 (m, 1H), 5.54 (dd, *J* = 8.4, 4.8 Hz, 1H), 3.71 (dd, *J* = 17.4, 8.4 Hz, 1H), 3.40 (dd, *J* = 17.4, 4.8 Hz, 1H).

#### 3-amino-1,5-diphenylpentan-1-ol (P1)



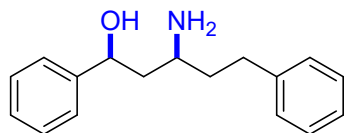

Molecular formula: C<sub>17</sub>H<sub>21</sub>NO

MW = 255.36 g/mol

To a round-bottom flask, **2a** (0.3 mmol, 88.62 mg) was dissolved into methanol (10 mL) and the solution cooled to 0 °C. NaBH<sub>4</sub> (0.9 mmol, 13.62 mg) was added and the mixture refluxed at 70 °C for 12 h. Ammonia solution (1 mL) was added dropwise. Then, the mixture was extracted with dichloromethane, the organic phase was washed with brine and dried over NaSO<sub>4</sub>. The dichloromethane was removed by rotary evaporator.<sup>22</sup>

Purification of the crude mixture by flash column chromatography (hexane/ethyl acetate 10/1) afforded compound 3-amino-1,5-diphenylpentan-1-ol **P1** (68.9 mg, 90%, syn: anti= 5:4) as a white solid.

<sup>1</sup>H NMR (500 MHz, Chloroform-d) δ 8.24 (s, 1H), 7.37 (d, *J* = 3.5 Hz, 4H), 7.32 – 7.27 (m, 3H), 7.21 (t, *J* = 7.4 Hz, 1H), 7.18 – 7.14 (m, 2H), 5.25 (dd, *J* = 11.8, 2.4 Hz, 1H), 3.66 (ddd, *J* = 11.7, 6.8, 3.7 Hz, 1H), 2.70 (dtd, *J* = 18.5, 6.4, 1.8 Hz, 2H), 2.34 – 2.26 (m, 1H), 2.13 – 2.00 (m, 2H), 1.94 – 1.83 (m, 2H).

<sup>13</sup>C NMR (126 MHz, Chloroform-d) δ 139.61, 137.56, 129.04, 128.87, 128.78, 128.21, 126.69, 126.17, 80.63, 52.17, 36.88, 34.42, 31.18.

IR (cm<sup>-1</sup>) 3854, 3183, 2323, 1150.

HRMS (ESI+) calculated for C<sub>17</sub>H<sub>22</sub>NO [M+H]<sup>+</sup> requires 256.1696 found 256.1699.

### 1-(3-oxobutyl)-3-phenylthiourea (**P2**)

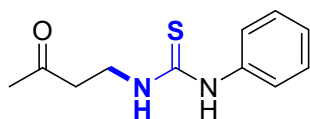

Molecular formula: C<sub>11</sub>H<sub>14</sub>N<sub>2</sub>OS

MW = 222.31 g/mol

To a round-bottom flask, **2p** (0.3 mmol, 38.75 mg) and aniline (0.45 mmol, 41 μL) were dissolved into methanol (10 mL), then refluxed for 8h. The solvents were evaporated under reduced pressure and the resulting materials were purified by flash column chromatography (hexanes/ethyl acetate 5/1) to afford the 1-(3-oxobutyl)-3-phenylthiourea **P2** (53.4 mg, 80%) as a white solid.<sup>23</sup>

<sup>1</sup>H NMR (500 MHz, Chloroform-d) δ 7.68 (s, 1H), 7.44 (tt, *J* = 8.4, 1.9 Hz, 2H), 7.34 – 7.29 (m, 1H), 7.15 (d, *J* = 7.8 Hz, 2H), 6.77 (s, 1H), 3.87 (q, *J* = 5.7 Hz, 2H), 2.89 (t, *J* = 5.5 Hz, 2H), 2.16 (s, 3H).

<sup>13</sup>C NMR (126 MHz, Chloroform-d) δ 208.87, 180.09, 135.98, 130.21, 127.26, 124.83, 42.32, 39.91, 30.12.

IR (cm<sup>-1</sup>) 3280, 2330, 1700, 1540.

HRMS (ESI+) calculated for C<sub>11</sub>H<sub>15</sub>N<sub>2</sub>OS [M+H]<sup>+</sup> 223.0900 found 223.0902.

**hexahydro-8a-methyl-6H-oxazolo[3,2-c]pyrimidine-5-thione (P3)**

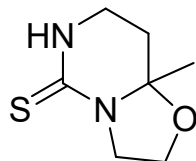

Molecular formula: C<sub>7</sub>H<sub>12</sub>N<sub>2</sub>OS

MW = 172.25 g/mol

To a round-bottom flask, **2p** (0.2 mmol, 25.80 mg) and ethanolamine (0.25 mmol, 15 μL) were dissolved into methanol (5 mL), then refluxed under argon for 12 h. The methanol was removed by rotary evaporator. Water was added, and the mixture was extracted with dichloromethane (2 × 20 mL), the organic phase was washed with brine and dried over NaSO<sub>4</sub>. The dichloromethane was removed by rotary evaporator. The residue was purified by flash column chromatography by using benzene and ethyl acetate mixture (5/1) as eluent to afford hexahydro-8a-methyl-6H-oxazolo[3,2-c]pyrimidine-5-thione **P3** (18.3 mg, 53%) as a solid.<sup>24</sup>

<sup>1</sup>H NMR (500 MHz, Chloroform-d) δ 6.44 (s, 1H), 4.25 (ddd, *J* = 10.9, 8.3, 7.4 Hz, 1H), 4.11 (dqt, *J* = 12.6, 8.8, 4.9 Hz, 2H), 3.83 (ddd, *J* = 11.0, 7.1, 4.7 Hz, 1H), 3.42 (m, 1H), 3.28 (td, *J* = 13.3, 4.6 Hz, 1H), 2.19 (ddt, *J* = 12.7, 4.6, 1.6 Hz, 1H), 1.83 (m, 1H), 1.40 (d, *J* = 0.9 Hz, 3H).

<sup>13</sup>C NMR (126 MHz, Chloroform-d) δ 175.18, 90.16, 62.79, 48.54, 38.44, 31.61, 22.56.

IR (cm<sup>-1</sup>) 1653, 1457, 906, 722.

HRMS (ESI+) calculated for C<sub>7</sub>H<sub>13</sub>N<sub>2</sub>OS. [M+H]<sup>+</sup> requires 173.0743 found 173.0741.

## 5. Additional control experiments

The reaction between TMSNCS and ethanol (95%) can proceed to isothiocyanic acid and  $\text{CH}_3\text{CH}_2\text{OTMS}$ , as detected by  $^1\text{H}$  NMR (Figure S8).<sup>25</sup> There is no reaction between TMSNCS and hexanes.

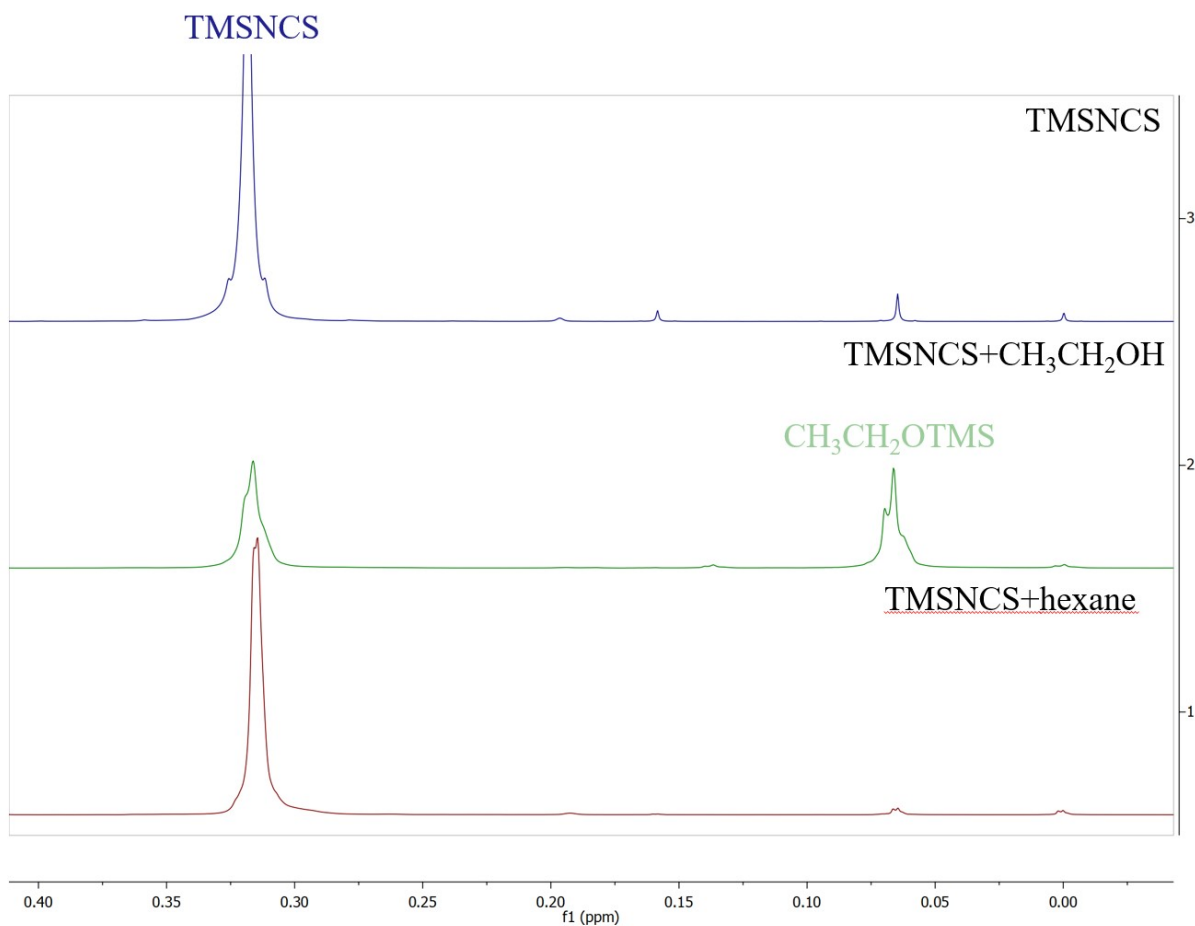

**Figure S8** NMR comparison between TMSNCS in ethanol and TMSNCS in hexane<sup>a</sup>

<sup>a</sup> Reaction condition: TMSNCS (0.3 mmol, 42  $\mu\text{L}$ ) and ethanol (0.3 mmol, 18.4  $\mu\text{L}$ ); TMSNCS (0.3 mmol, 42  $\mu\text{L}$ ) and hexane (0.3 mmol, 39.1  $\mu\text{L}$ ) for 12 h at 25  $^\circ\text{C}$

## 6. Computational details

Density functional theory (DFT) calculations were performed using Gaussian 16.<sup>26</sup> Geometry optimizations were done with the M06-2X functional,<sup>27</sup> using the 6-31+G(d,p) basis set, and SMD implicit solvation<sup>28</sup> to model the effects of ethanol solution (the experimental solvent). Vibrational analysis on the stationary points allowed for the confirmation of minima structures (zero imaginary frequencies) and transition structures (TS, exactly one imaginary frequency). Zero-point energy, enthalpy and free energy corrections were obtained with a state of 1 atm pressure and 298.15 K temperature using Goodvibes version 3.2,<sup>29</sup> applying Grimme's quasiharmonic oscillator approximation with a frequency cut-off value of 100 cm<sup>-1</sup>.<sup>30</sup> To obtain accurate energies, single-point energy refinements were then performed at the M06-2X/def2tzvpp level of theory (this basis set affords more relevant energy values in our system, Table S2), using the SMD ethanol solvation model. The free energy values reported were then obtained by adding the free energy corrections obtained from the frequency analysis to the single-point electronic energies. Visualizations of the computed structures were prepared using CYLview.<sup>31</sup>

### Benchmark of single point refinement methods:

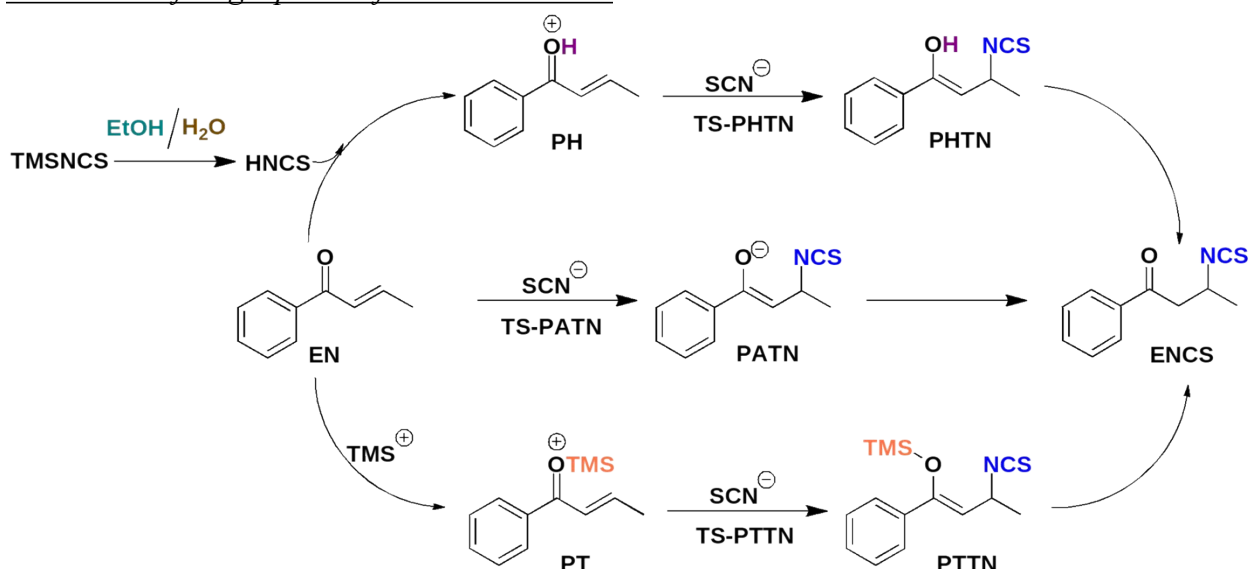

**Table S2. Intermediates single-point energy refinement methods screening**

| Entry | SPE method <sup>a</sup> | PHTN <sup>b</sup> | PHTN <sup>c</sup> | PATN | PTTN |
|-------|-------------------------|-------------------|-------------------|------|------|
| 1     | M062X/def2tzvpp         | 9.2               | 8.5               | 24.2 | 10.2 |
| 2     | M062X/aug-cc-pVTZ       | 10.0              | 9.6               | 24.8 | 10.5 |
| 3     | ωB97X-D/aug-cc-pVTZ     | 13.2              | 12.9              | 26.5 | 12.5 |

4 B3LYP-D3(BJ)/aug-cc-pVTZ 15.8 15.8 27.8 15.1

<sup>a</sup> Single-point energy refinement method with the SMD solvation model. <sup>b</sup> Protonic pathway with EtOH involved. <sup>c</sup> Protonic pathway with H<sub>2</sub>O involved

**Table S3. TS single-point energy refinement methods screening**

| Entry | SPE method <sup>a</sup>  | TS-PHTN <sup>b</sup> | TS-PHTN <sup>c</sup> | TS-PATN | TS-PTTN |
|-------|--------------------------|----------------------|----------------------|---------|---------|
| 1     | M062X/def2tzvpp          | 26.0                 | 25.4                 | 29.3    | 29.3    |
| 2     | M062X/aug-cc-pVTZ        | 26.2                 | 25.7                 | 29.6    | 28.7    |
| 3     | wB97X-D/aug-cc-pVTZ      | 30.0                 | 29.2                 | 31.5    | 31.0    |
| 4     | B3LYP-D3(BJ)/aug-cc-pVTZ | 26.3                 | 26.3                 | 29.4    | 27.0    |

<sup>a</sup> Single-point energy refinement method with the SMD solvation model. <sup>b</sup> Protonic pathway with EtOH involved. <sup>c</sup> Protonic pathway with H<sub>2</sub>O involved

## 7. Additional Figures/Schemes

 From H<sub>2</sub>O (PHR)

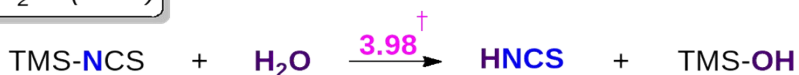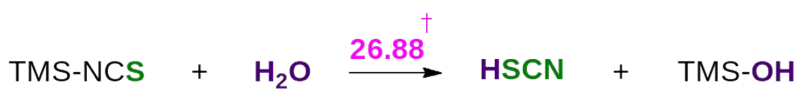

 From EtOH (PER)

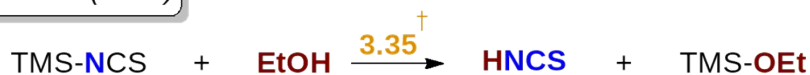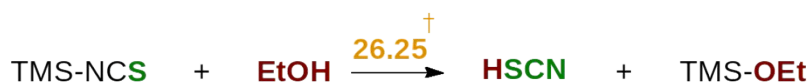

**Figure S9. The first step of the reactions protonated pathways H<sub>2</sub>O and EtOH**

For the case of the plausible protonated pathways of EtOH and H<sub>2</sub>O, the first step involves the protic solvent forming isothiocyanic acid, HNCS or thiocyanic acid HSCN (Figure S9). Because of this, the difference in free energies were calculated between both species: for HSCN, it is approximately 23 kcal/mol energetically lower in free energy. Guda et al.<sup>32</sup> reported similar

experimental observations and showed that the formation of HNCS is more favorable, as reported by our DFT studies.

Figure S10 shows the most plausible reaction mechanisms: in the top is shown the anionic pathway; in light blue the EtOH-involved pathway; in brown is shown the H<sub>2</sub>O-involved pathway; and in black is the TMS-involved pathway. The reactants, enone, EtOH, TMSNCS and H<sub>2</sub>O, are the reference states.

**A** Anionic pathway

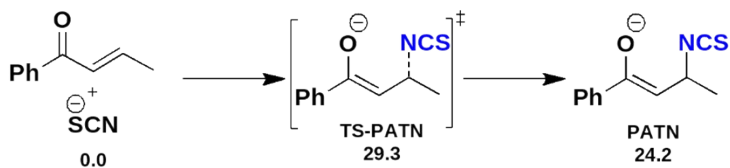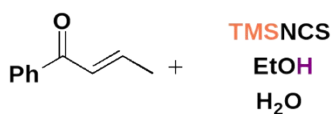

EtOH -----  
H<sub>2</sub>O -----

**B** Protonic pathways

**C** TMS pathway

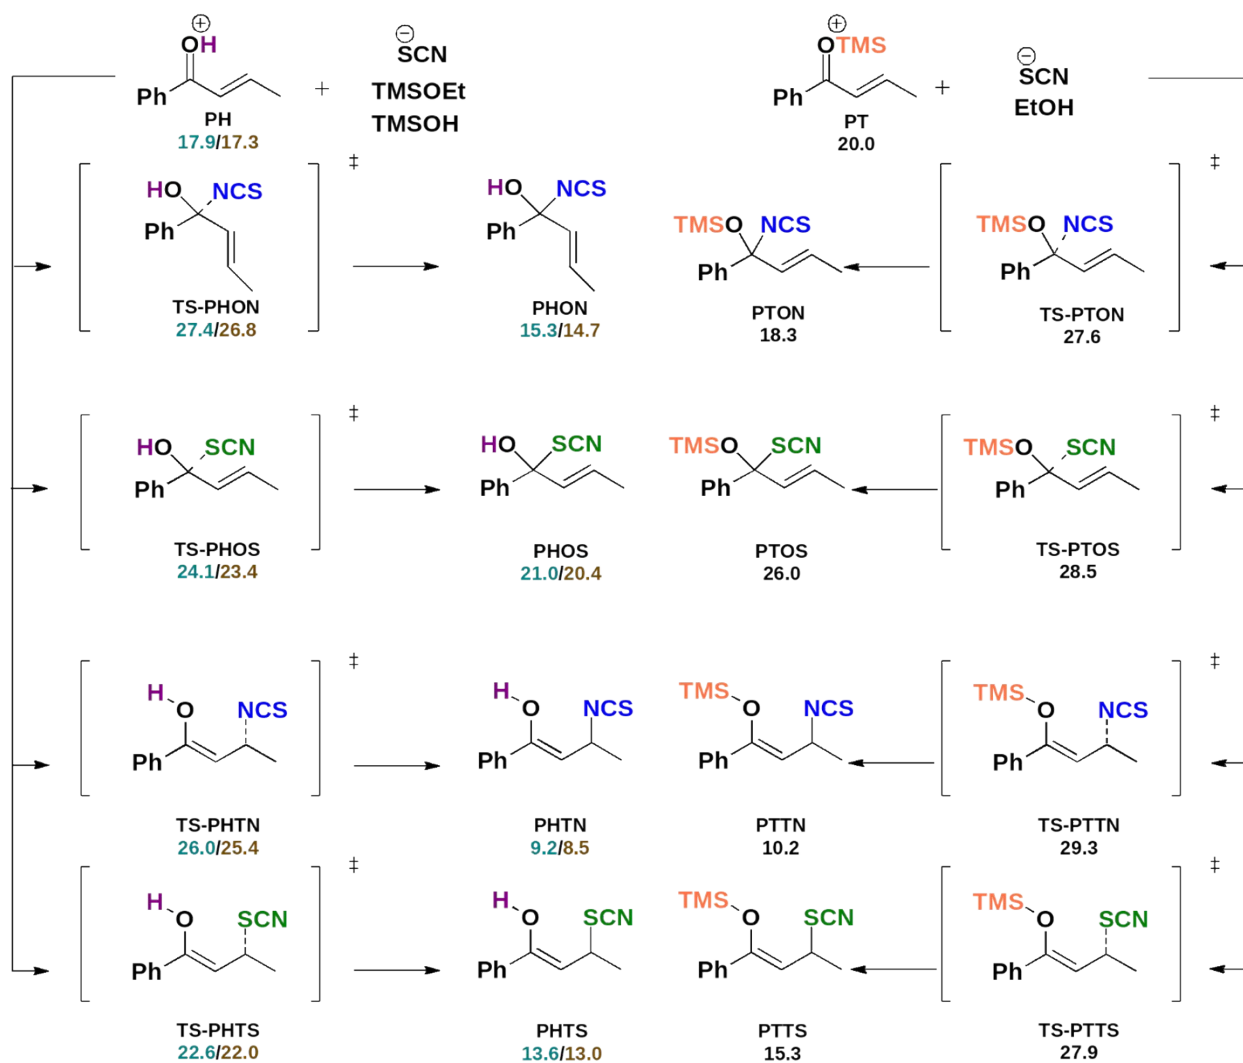

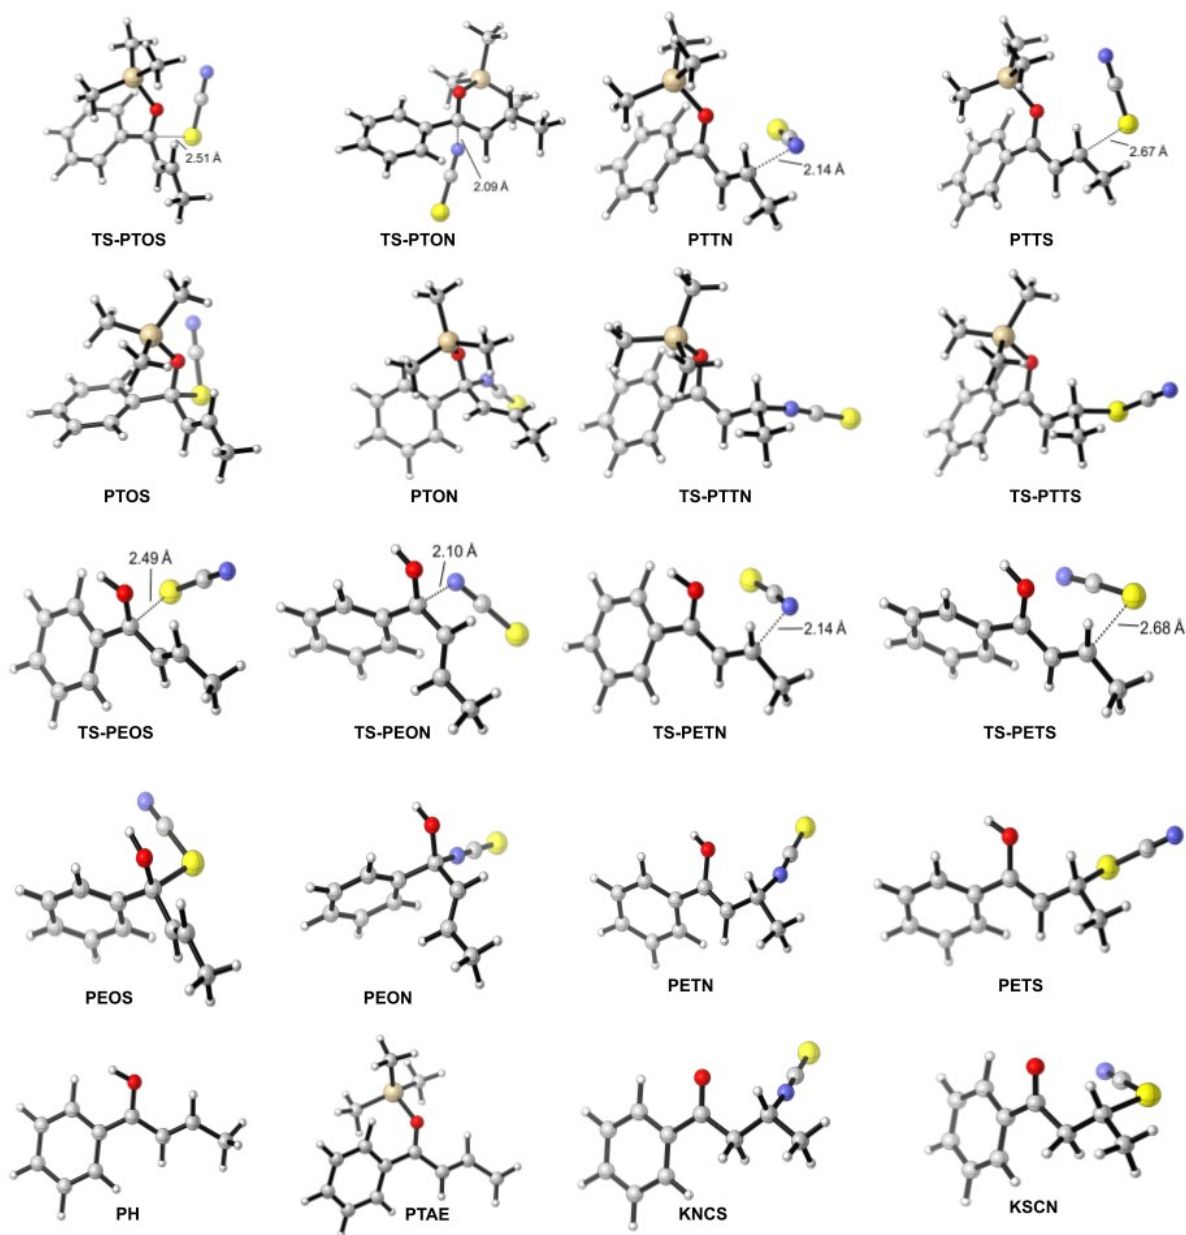

**Figure S10. Plausible reaction mechanisms**

Figure S11 depicts the reaction mechanism for the protonated pathway that shows more favorable activation and reaction energies than the TMS-involved pathway. Also, the reaction can happen with anhydrous ethanol like the EtOH-involved pathway. However, the reaction can occur at a lower energy cost with the presence of water in the reaction media, shown by the H<sub>2</sub>O-involved pathway.



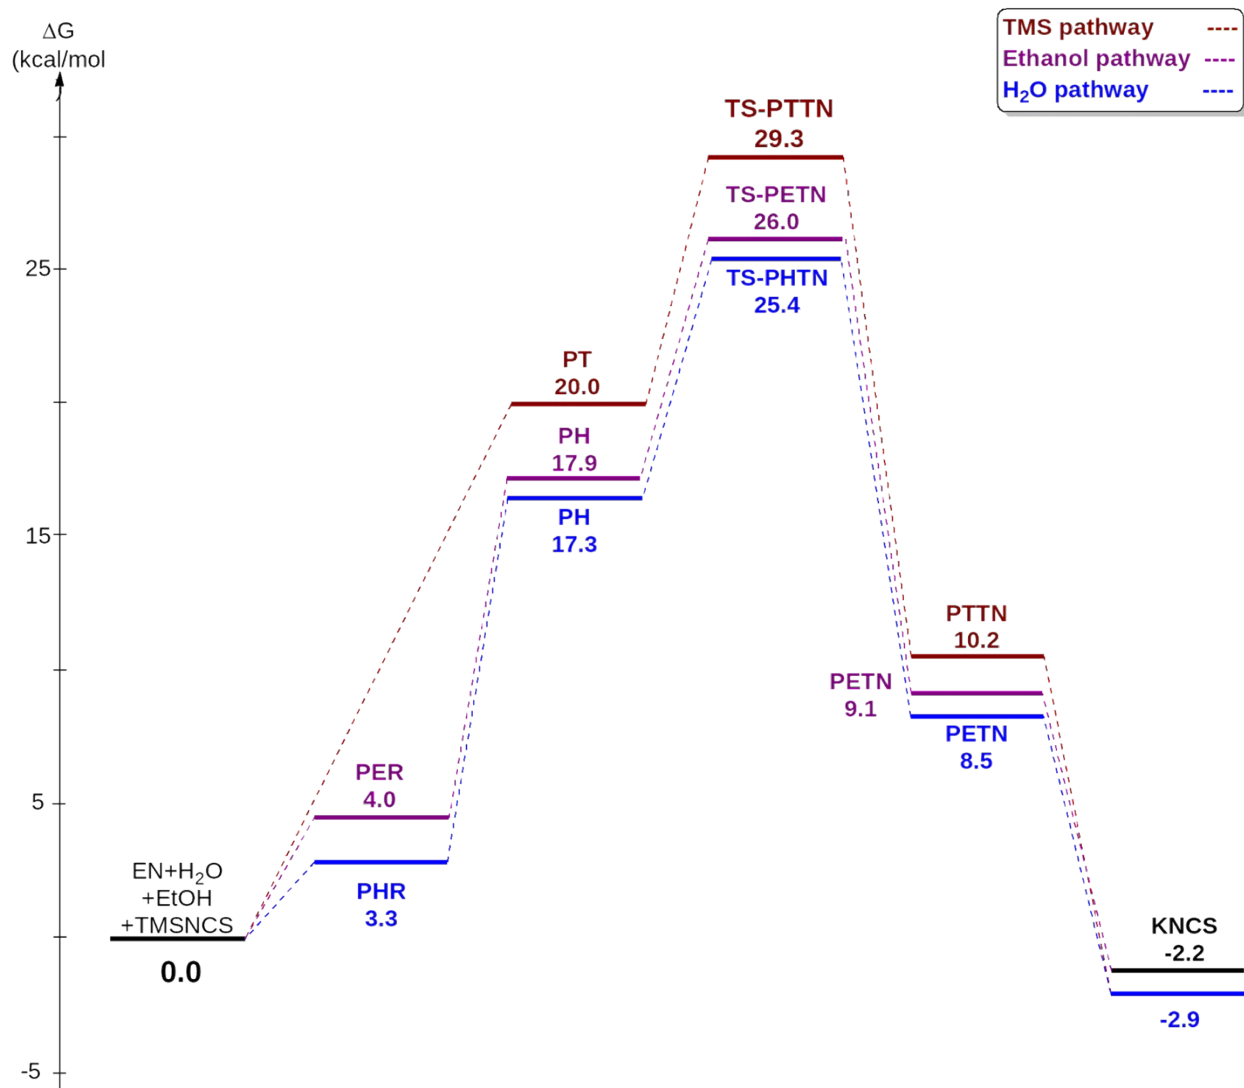

Figure S11. PES pathways of the plausible mechanisms

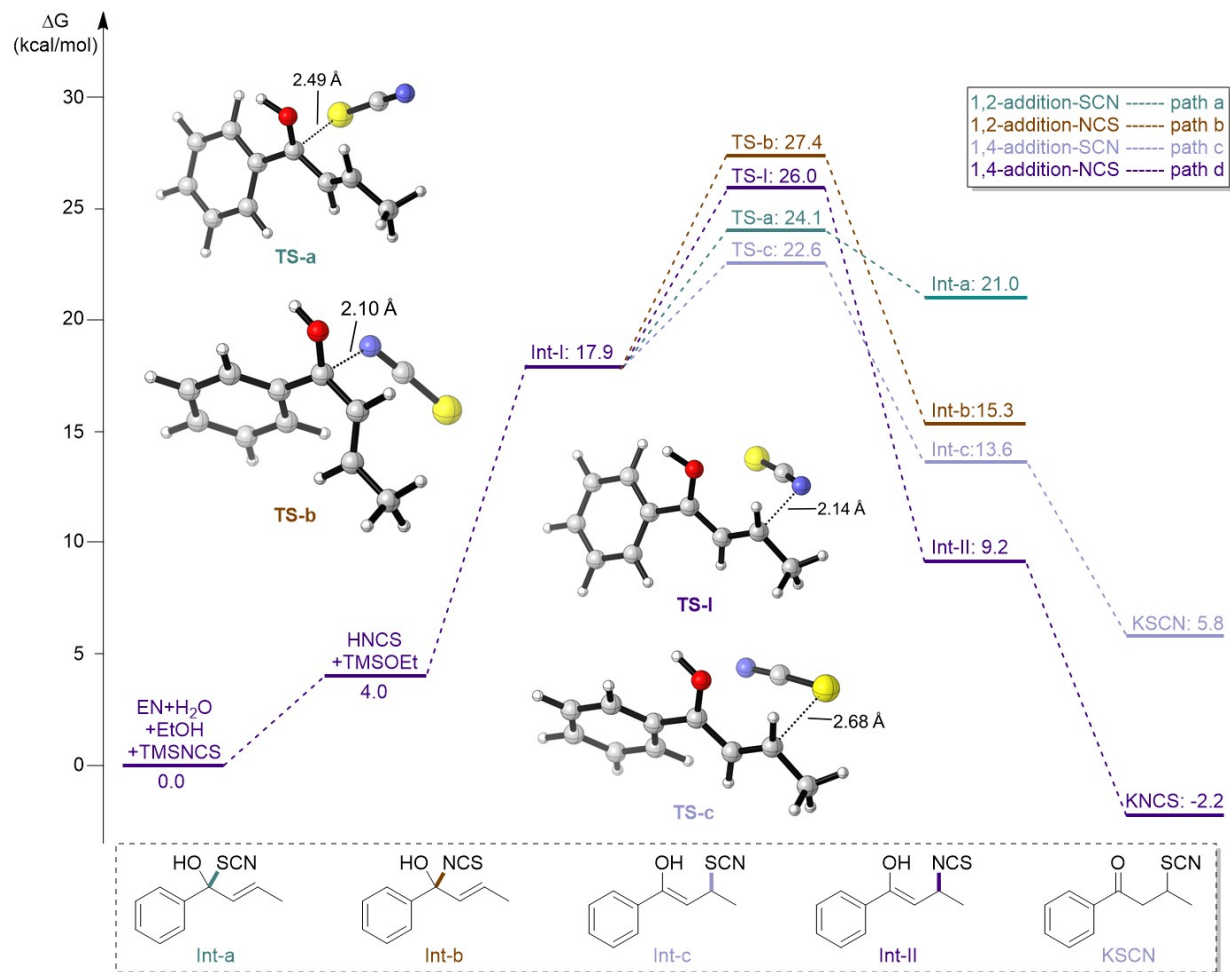

Figure S12. PES pathways of the ethanol pathway

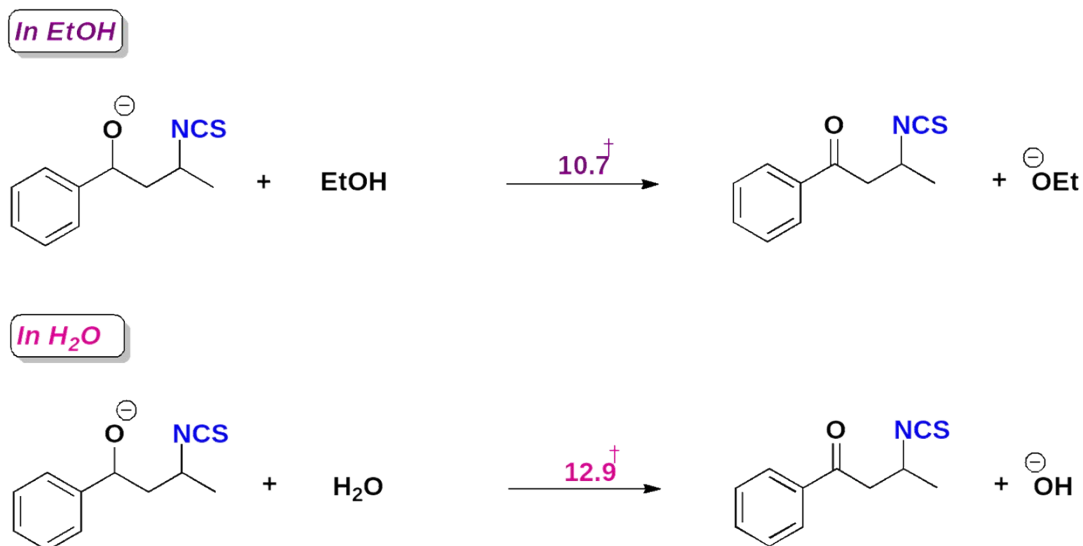

Figure S13. PES pathways of the ethanol pathway

In EtOH

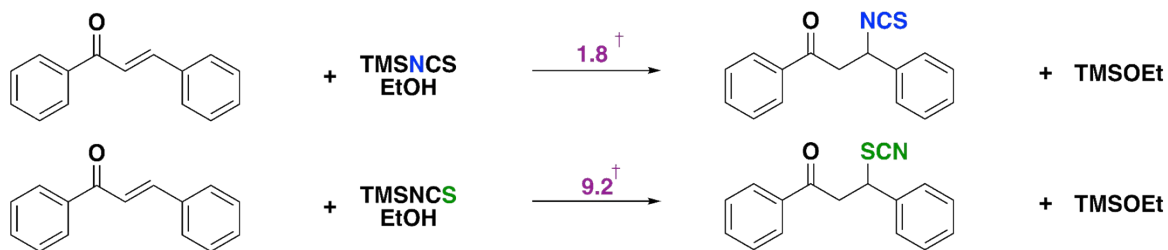

In H<sub>2</sub>O

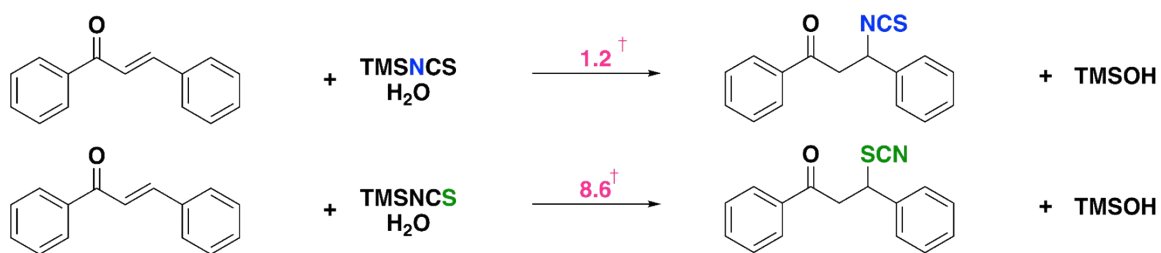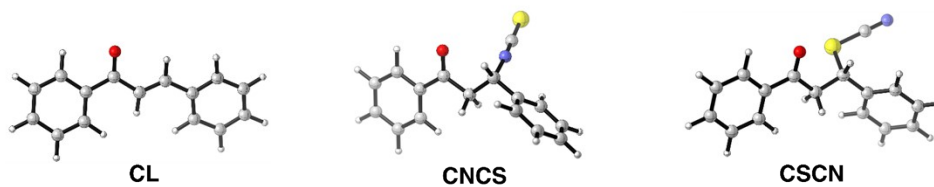

Figure S14. Free energies for chalcone substrate

## 8. Complete energy data

Energy (E), enthalpy (H) and quasi-harmonic-corrected free energy (qh-G(T)) are obtained from the M06-2X/6-31+G(d,p)/SMD(EtOH) optimizations and frequency calculations. Single-point refinements (SPE) are obtained at the M06-2X/def2tzvpp/SMD(EtOH) level of theory.

**Table S4. Absolute energy (in Hartrees) of all computed structures**

| Structure               | E           | H           | qh-G(T)     | SPE         |
|-------------------------|-------------|-------------|-------------|-------------|
| <i>Base system</i>      |             |             |             |             |
| EtOH                    | -154.982973 | -154.89987  | -154.930527 | -155.039706 |
| EtO                     | -154.475204 | -154.405884 | -154.435663 | -154.527196 |
| H <sub>2</sub> O        | -76.409008  | -76.384653  | -76.406744  | -76.441022  |
| HNCS                    | -491.568024 | -491.545712 | -491.574353 | -491.637086 |
| HSCN                    | -491.549788 | -491.52868  | -491.558093 | -491.598621 |
| OH                      | -75.903301  | -75.891456  | -75.911013  | -75.927883  |
| SCN                     | -491.121805 | -491.109371 | -491.135902 | -491.195226 |
| TMS-NCS                 | -900.195263 | -900.064751 | -900.112522 | -900.335425 |
| TMS cation              | -408.965707 | -408.850592 | -408.891033 | -409.036509 |
| TMSCI                   | -869.39592  | -869.276832 | -869.319205 | -869.502479 |
| TMSOEt                  | -563.598478 | -563.409384 | -563.458898 | -563.729765 |
| TMSOH                   | -485.023038 | -484.892326 | -484.935576 | -485.13015  |
| EN                      | -462.126989 | -461.948865 | -461.995663 | -462.279853 |
| KNCS                    | -953.733063 | -953.527192 | -953.582489 | -953.952428 |
| KSCN                    | -953.717462 | -953.512704 | -953.567802 | -953.938666 |
| <i>Activated enones</i> |             |             |             |             |
| PT (Int-IV)             | -871.165967 | -870.869556 | -870.93336  | -871.392704 |

|                   |             |             |             |             |
|-------------------|-------------|-------------|-------------|-------------|
| <b>PH (Int-I)</b> | -462.549882 | -462.359069 | -462.405867 | -462.704425 |
|-------------------|-------------|-------------|-------------|-------------|

---

***TMS pathway***

---

***TSs***

|                         |              |              |              |              |
|-------------------------|--------------|--------------|--------------|--------------|
| <b>TS-PTTN (TS-III)</b> | -1362.299651 | -1361.990534 | -1362.061414 | -1362.592699 |
|-------------------------|--------------|--------------|--------------|--------------|

|                |              |              |              |              |
|----------------|--------------|--------------|--------------|--------------|
| <b>TS-PTTS</b> | -1362.301097 | -1361.992023 | -1362.063481 | -1362.594305 |
|----------------|--------------|--------------|--------------|--------------|

|                |              |              |              |              |
|----------------|--------------|--------------|--------------|--------------|
| <b>TS-PTON</b> | -1362.302112 | -1361.993112 | -1362.064396 | -1362.594921 |
|----------------|--------------|--------------|--------------|--------------|

|                |              |              |              |              |
|----------------|--------------|--------------|--------------|--------------|
| <b>TS-PTOS</b> | -1362.299984 | -1361.991176 | -1362.062608 | -1362.593112 |
|----------------|--------------|--------------|--------------|--------------|

***Intermediates***

|                     |              |             |             |              |
|---------------------|--------------|-------------|-------------|--------------|
| <b>PTTN (Int-V)</b> | -1362.331611 | -1362.01988 | -1362.09138 | -1362.625244 |
|---------------------|--------------|-------------|-------------|--------------|

|             |              |              |              |              |
|-------------|--------------|--------------|--------------|--------------|
| <b>PTTS</b> | -1362.320746 | -1362.010067 | -1362.081379 | -1362.616217 |
|-------------|--------------|--------------|--------------|--------------|

|             |              |              |              |              |
|-------------|--------------|--------------|--------------|--------------|
| <b>PTON</b> | -1362.318603 | -1362.007987 | -1362.078967 | -1362.611661 |
|-------------|--------------|--------------|--------------|--------------|

|             |              |              |              |              |
|-------------|--------------|--------------|--------------|--------------|
| <b>PTOS</b> | -1362.304313 | -1361.994581 | -1362.065334 | -1362.598752 |
|-------------|--------------|--------------|--------------|--------------|

---

***Protonated pathway***

---

***TSs***

|                       |             |             |             |             |
|-----------------------|-------------|-------------|-------------|-------------|
| <b>TS-PHTN (TS-I)</b> | -953.684354 | -953.481304 | -953.536191 | -953.904945 |
|-----------------------|-------------|-------------|-------------|-------------|

|                |             |             |             |             |
|----------------|-------------|-------------|-------------|-------------|
| <b>TS-PHTS</b> | -953.690857 | -953.487249 | -953.541773 | -953.911387 |
|----------------|-------------|-------------|-------------|-------------|

|                |             |             |             |             |
|----------------|-------------|-------------|-------------|-------------|
| <b>TS-PHON</b> | -953.682589 | -953.479375 | -953.534118 | -953.903073 |
|----------------|-------------|-------------|-------------|-------------|

|                |             |             |             |             |
|----------------|-------------|-------------|-------------|-------------|
| <b>TS-PHOS</b> | -953.687704 | -953.484321 | -953.538941 | -953.908712 |
|----------------|-------------|-------------|-------------|-------------|

***Intermediates***

|                      |             |             |             |             |
|----------------------|-------------|-------------|-------------|-------------|
| <b>PHTN (Int-II)</b> | -953.713545 | -953.507655 | -953.563012 | -953.934245 |
|----------------------|-------------|-------------|-------------|-------------|

|             |             |             |             |             |
|-------------|-------------|-------------|-------------|-------------|
| <b>PHTS</b> | -953.703422 | -953.498587 | -953.553981 | -953.925996 |
|-------------|-------------|-------------|-------------|-------------|

|             |             |             |             |             |
|-------------|-------------|-------------|-------------|-------------|
| <b>PHON</b> | -953.703691 | -953.500027 | -953.554008 | -953.923546 |
|-------------|-------------|-------------|-------------|-------------|

|             |             |             |             |             |
|-------------|-------------|-------------|-------------|-------------|
| <b>PHOS</b> | -953.691735 | -953.487683 | -953.543068 | -953.913476 |
|-------------|-------------|-------------|-------------|-------------|

---

***Anionic Pathway***

---

---

|                        |             |             |             |             |
|------------------------|-------------|-------------|-------------|-------------|
| <b>PATN (Int-III)</b>  | -953.238021 | -953.045493 | -953.100644 | -953.456646 |
| <b>TS-PATN (TS-II)</b> | -953.229263 | -953.038621 | -953.092691 | -953.447725 |

---

*Chalcone*

---

|             |              |              |              |              |
|-------------|--------------|--------------|--------------|--------------|
| <b>CL</b>   | -653.806323  | -653.573029  | -653.627328  | -654.019061  |
| <b>CNCS</b> | -1145.405568 | -1145.144981 | -1145.2079   | -1145.684575 |
| <b>CSCN</b> | -1145.391435 | -1145.13152  | -1145.194298 | -1145.672339 |

---

## 9. XYZ coordinates for all computed structures

Output files for all Gaussian 16 optimized geometries have been archived and can be accessed on Zenodo (DOI: 10.5281/zenodo.8432613).

|            |          |          |          |                  |          |          |          |
|------------|----------|----------|----------|------------------|----------|----------|----------|
| TMS cation |          |          |          | H                | 0.76001  | -1.03481 | -1.02194 |
| C          | -1.53105 | -0.99839 | -0.00112 | H                | 0.71606  | -2.10982 | 0.36606  |
| H          | -2.16557 | -0.68669 | -0.84012 | N                | 0.73383  | 2.37618  | -0.84494 |
| H          | -1.32732 | -2.06873 | -0.06712 | S                | 3.03292  | 0.71430  | -0.51794 |
| H          | -2.09198 | -0.78553 | 0.91888  |                  |          |          |          |
| C          | 1.63219  | -0.82416 | -0.00412 |                  |          |          |          |
| C          | -0.10020 | 1.82326  | 0.00488  | SCN              |          |          |          |
| H          | 2.44571  | -0.12196 | -0.19912 | S                | 0.00000  | 0.00000  | 1.02934  |
| H          | 1.78595  | -1.28308 | 0.98288  | C                | 0.00000  | 0.00000  | -0.63365 |
| H          | 1.64223  | -1.63565 | -0.74012 | N                | 0.00000  | 0.00000  | -1.80966 |
| H          | 0.59717  | 2.23623  | 0.74088  |                  |          |          |          |
| H          | 0.22283  | 2.18642  | -0.98112 | TMSOEt           |          |          |          |
| H          | -1.11375 | 2.17930  | 0.20288  | C                | -1.14319 | -1.34795 | -1.23421 |
| Si         | -0.00007 | -0.00176 | -0.00112 | H                | -0.86421 | -1.04372 | -2.24925 |
|            |          |          |          | H                | -0.58023 | -2.25380 | -0.98113 |
|            |          |          |          | H                | -2.20721 | -1.61385 | -1.24402 |
| KSCN       |          |          |          | C                | -1.15403 | -0.59244 | 1.73822  |
| C          | -0.09404 | -0.20786 | 0.78706  | C                | -1.85498 | 1.54239  | -0.38194 |
| C          | 3.31305  | -1.89968 | 0.08506  | H                | -0.91896 | 0.17717  | 2.48167  |
| H          | 3.06009  | -2.75670 | 0.71606  | H                | -2.21104 | -0.85975 | 1.85340  |
| H          | 3.21807  | -2.19669 | -0.96294 | H                | -0.56108 | -1.48422 | 1.96835  |
| C          | 2.36199  | -0.75773 | 0.42206  | H                | -2.92399 | 1.31719  | -0.30062 |
| H          | 2.43798  | -0.49173 | 1.47706  | H                | -1.62691 | 2.35414  | 0.31765  |
| C          | 1.65687  | 1.69023  | -0.68094 | H                | -1.66000 | 1.90262  | -1.39780 |
| H          | 4.35504  | -1.63263 | 0.28506  | Si               | -0.83206 | 0.02710  | -0.00082 |
| O          | 0.23893  | 0.47016  | 1.74806  | O                | 0.76997  | 0.54341  | -0.12923 |
| C          | -1.51103 | -0.21993 | 0.31706  | C                | 1.83591  | -0.39899 | -0.02328 |
| C          | -2.38209 | 0.76603  | 0.79906  | H                | 1.80284  | -1.08926 | -0.87749 |
| C          | -1.98199 | -1.18295 | -0.58294 | H                | 1.72391  | -0.99292 | 0.89483  |
| C          | -3.70909 | 0.78896  | 0.38406  | C                | 3.15696  | 0.34286  | -0.00296 |
| H          | -2.00512 | 1.51405  | 1.49006  | H                | 3.98792  | -0.36641 | 0.06774  |
| C          | -3.31599 | -1.16502 | -0.98694 | H                | 3.27996  | 0.93078  | -0.91809 |
| H          | -1.32095 | -1.95592 | -0.96394 | H                | 3.20403  | 1.02012  | 0.85521  |
| C          | -4.17804 | -0.17906 | -0.50694 |                  |          |          |          |
| H          | -4.37813 | 1.56093  | 0.75306  |                  |          |          |          |
| H          | -3.68095 | -1.91904 | -1.67794 |                  |          |          |          |
| H          | -5.21504 | -0.16212 | -0.82894 | H <sub>2</sub> O |          |          |          |
| C          | 0.92001  | -1.07281 | 0.06106  | O                | 0.00000  | 0.00000  | 0.11780  |

|         |          |          |          |      |          |          |          |
|---------|----------|----------|----------|------|----------|----------|----------|
| H       | 0.00000  | 0.76600  | -0.47120 | H    | 0.50513  | -0.10451 | 2.47264  |
| H       | -0.00000 | -0.76600 | -0.47120 | H    | 0.51027  | -1.73365 | 1.76412  |
|         |          |          |          | H    | 0.50094  | 2.39677  | 0.61646  |
|         |          |          |          | H    | 1.97419  | 1.85049  | -0.20765 |
| EtOH    |          |          |          | H    | 0.50855  | 2.19330  | -1.14793 |
| C       | -0.00000 | 0.55308  | 0.00000  | Si   | 0.36100  | 0.00112  | -0.00006 |
| H       | 0.02718  | 1.19707  | 0.88800  | Cl   | -1.76000 | -0.00174 | -0.00085 |
| H       | 0.02718  | 1.19707  | -0.88800 |      |          |          |          |
| C       | 1.17674  | -0.39725 | 0.00000  | HNCS |          |          |          |
| H       | 1.15656  | -1.03524 | -0.88900 | C    | -0.00000 | 0.50536  | 0.00000  |
| H       | 2.11589  | 0.16449  | 0.00000  | S    | 0.03566  | -1.08726 | 0.00000  |
| H       | 1.15656  | -1.03524 | 0.88900  | N    | -0.12501 | 1.68132  | 0.00000  |
| O       | -1.19822 | -0.22459 | 0.00000  | H    | 0.30455  | 2.59472  | 0.00000  |
| H       | -1.95805 | 0.37362  | 0.00000  |      |          |          |          |
|         |          |          |          |      |          |          |          |
| TMS-NCS |          |          |          | EN   |          |          |          |
| C       | 1.69489  | 0.00030  | 0.00091  | C    | 2.35301  | -1.55700 | -0.16808 |
| S       | 3.29689  | -0.00013 | -0.00001 | C    | 1.01900  | -1.15303 | -0.19208 |
| N       | 0.51389  | 0.00031  | 0.00091  | C    | 0.69097  | 0.19796  | -0.02008 |
| Si      | -1.26311 | -0.00008 | -0.00000 | C    | 1.71395  | 1.13498  | 0.17992  |
| C       | -1.77212 | -0.72816 | 1.63720  | C    | 3.04296  | 0.72801  | 0.21892  |
| H       | -1.39611 | -0.12601 | 2.47046  | C    | 3.36399  | -0.62098 | 0.04292  |
| H       | -2.86612 | -0.76142 | 1.70701  | H    | 2.60103  | -2.60400 | -0.31408 |
| H       | -1.39313 | -1.74958 | 1.74831  | H    | 0.24401  | -1.89205 | -0.36808 |
| C       | -1.77012 | -1.05428 | -1.45006 | H    | 1.45393  | 2.18098  | 0.31192  |
| H       | -1.39213 | -2.07593 | -1.34433 | H    | 3.82894  | 1.45803  | 0.38492  |
| H       | -2.86313 | -1.10097 | -1.51238 | H    | 4.40199  | -0.93896 | 0.06992  |
| H       | -1.39212 | -0.63924 | -2.38922 | C    | -0.72204 | 0.68593  | -0.07108 |
| C       | -1.77110 | 1.78269  | -0.18848 | O    | -0.94707 | 1.87493  | -0.29608 |
| H       | -1.39409 | 2.38949  | 0.64049  | C    | -1.82002 | -0.27809 | 0.16792  |
| H       | -1.39210 | 2.20170  | -1.12614 | C    | -3.09703 | 0.05988  | -0.06308 |
| H       | -2.86410 | 1.85962  | -0.19788 | H    | -1.57500 | -1.26708 | 0.54392  |
|         |          |          |          | H    | -3.30605 | 1.05888  | -0.44708 |
|         |          |          |          | C    | -4.26601 | -0.83614 | 0.16192  |
| TMSCl   |          |          |          | H    | -4.96502 | -0.37215 | 0.86692  |
| C       | 0.88543  | -1.06662 | -1.43672 | H    | -4.81700 | -0.98115 | -0.77408 |
| H       | 1.97945  | -1.10789 | -1.48799 | H    | -3.96299 | -1.81113 | 0.55092  |
| H       | 0.50933  | -2.08846 | -1.32480 |      |          |          |          |
| H       | 0.51379  | -0.66276 | -2.38367 | HSCN |          |          |          |
| C       | 0.88238  | -0.71164 | 1.64219  | C    | 0.67285  | -0.00833 | 0.00014  |
| C       | 0.88019  | 1.77949  | -0.20414 | N    | 1.81876  | 0.04148  | -0.00007 |
| H       | 1.97636  | -0.73671 | 1.70619  |      |          |          |          |



|                                                 |          |          |          |    |          |          |          |
|-------------------------------------------------|----------|----------|----------|----|----------|----------|----------|
| S                                               | -0.94499 | -0.07914 | -0.00002 | H  | 2.31250  | 0.88492  | -0.19488 |
| H                                               | -1.64849 | 1.02583  | -0.00000 | H  | 2.31085  | -0.88908 | -0.19298 |
|                                                 |          |          |          | Si | 0.00507  | 0.00000  | 0.02090  |
|                                                 |          |          |          | O  | 0.10822  | 0.00177  | 1.70695  |
|                                                 |          |          |          | H  | -0.72803 | 0.00259  | 2.18953  |
| KNCS                                            |          |          |          |    |          |          |          |
| C                                               | 0.39583  | 0.29288  | 0.66400  |    |          |          |          |
| C                                               | -2.53126 | 2.72977  | -0.11100 |    |          |          |          |
| H                                               | -2.01929 | 3.63479  | 0.22500  |    |          |          |          |
| H                                               | -2.51226 | 2.69677  | -1.20400 |    |          |          |          |
| C                                               | -1.82621 | 1.51079  | 0.47300  |    |          |          |          |
| H                                               | -1.85021 | 1.55179  | 1.56600  |    |          |          |          |
| C                                               | -2.96413 | -0.72425 | -0.21600 |    |          |          |          |
| H                                               | -3.57026 | 2.76973  | 0.22600  |    |          |          |          |
| O                                               | -0.11014 | -0.37014 | 1.55800  |    |          |          |          |
| N                                               | -2.53317 | 0.31777  | 0.09600  |    |          |          |          |
| S                                               | -3.58808 | -2.14727 | -0.64500 |    |          |          |          |
| C                                               | 1.79784  | 0.02893  | 0.21800  |    |          |          |          |
| C                                               | 2.50188  | -1.02805 | 0.81000  |    |          |          |          |
| C                                               | 2.41881  | 0.80995  | -0.76400 |    |          |          |          |
| C                                               | 3.80989  | -1.30000 | 0.42600  |    |          |          |          |
| H                                               | 2.01290  | -1.63106 | 1.56900  |    |          |          |          |
| C                                               | 3.73182  | 0.53800  | -1.14500 |    |          |          |          |
| H                                               | 1.89078  | 1.63393  | -1.23400 |    |          |          |          |
| C                                               | 4.42686  | -0.51597 | -0.55200 |    |          |          |          |
| H                                               | 4.35092  | -2.12098 | 0.88600  |    |          |          |          |
| H                                               | 4.20980  | 1.14802  | -1.90500 |    |          |          |          |
| H                                               | 5.44887  | -0.72694 | -0.85200 |    |          |          |          |
| C                                               | -0.38021 | 1.40885  | -0.00500 |    |          |          |          |
| H                                               | -0.35420 | 1.27585  | -1.09300 |    |          |          |          |
| H                                               | 0.12876  | 2.35587  | 0.21200  |    |          |          |          |
| TMSOH                                           |          |          |          |    |          |          |          |
| C                                               | -0.90220 | -1.53428 | -0.55492 |    |          |          |          |
| H                                               | -0.39171 | -2.44411 | -0.21968 |    |          |          |          |
| H                                               | -1.92741 | -1.55649 | -0.16741 |    |          |          |          |
| H                                               | -0.95766 | -1.56143 | -1.64891 |    |          |          |          |
| C                                               | -0.89907 | 1.53472  | -0.55720 |    |          |          |          |
| C                                               | 1.78136  | -0.00227 | -0.55720 |    |          |          |          |
| H                                               | -0.38791 | 2.44388  | -0.22391 |    |          |          |          |
| H                                               | -0.95551 | 1.56056  | -1.65225 |    |          |          |          |
| H                                               | -1.92426 | 1.55951  | -0.17074 |    |          |          |          |
| H                                               | 1.83191  | -0.00346 | -1.65117 |    |          |          |          |
| TS-PATN (TS-II)                                 |          |          |          |    |          |          |          |
| Imaginary frequency: -430.0791 cm <sup>-1</sup> |          |          |          |    |          |          |          |
| C                                               | -0.14610 | -0.48893 | 0.74109  |    |          |          |          |
| C                                               | 2.79684  | -2.61401 | -0.39191 |    |          |          |          |
| H                                               | 2.36682  | -3.58500 | -0.12291 |    |          |          |          |
| H                                               | 2.71485  | -2.49201 | -1.47591 |    |          |          |          |
| C                                               | 2.03187  | -1.53599 | 0.32909  |    |          |          |          |
| H                                               | 2.20187  | -1.50399 | 1.40409  |    |          |          |          |
| C                                               | 2.77794  | 1.01699  | -0.24591 |    |          |          |          |
| C                                               | 0.70088  | -1.26295 | -0.07491 |    |          |          |          |
| H                                               | 0.38587  | -1.54594 | -1.07391 |    |          |          |          |
| H                                               | 3.85284  | -2.61304 | -0.11191 |    |          |          |          |
| O                                               | 0.21092  | 0.03306  | 1.83809  |    |          |          |          |
| N                                               | 3.10191  | -0.09502 | 0.00909  |    |          |          |          |
| S                                               | 2.29998  | 2.52000  | -0.62591 |    |          |          |          |
| C                                               | -1.56209 | -0.24389 | 0.28209  |    |          |          |          |
| C                                               | -2.21806 | 0.91913  | 0.70209  |    |          |          |          |
| C                                               | -2.24912 | -1.14787 | -0.53891 |    |          |          |          |
| C                                               | -3.52505 | 1.18416  | 0.30009  |    |          |          |          |
| H                                               | -1.68704 | 1.62011  | 1.34109  |    |          |          |          |
| C                                               | -3.56211 | -0.88984 | -0.93291 |    |          |          |          |
| H                                               | -1.76614 | -2.06789 | -0.85591 |    |          |          |          |
| C                                               | -4.20208 | 0.27918  | -0.51891 |    |          |          |          |
| H                                               | -4.01703 | 2.09718  | 0.62509  |    |          |          |          |
| H                                               | -4.08613 | -1.60482 | -1.56091 |    |          |          |          |
| H                                               | -5.22407 | 0.48021  | -0.82891 |    |          |          |          |
| PATN (Int-III)                                  |          |          |          |    |          |          |          |
| C                                               | 0.48306  | 0.37301  | 0.62794  |    |          |          |          |
| C                                               | -2.23498 | 2.69996  | -0.60106 |    |          |          |          |
| H                                               | -1.59200 | 3.56797  | -0.43206 |    |          |          |          |
| H                                               | -2.23698 | 2.46996  | -1.67107 |    |          |          |          |
| C                                               | -1.68796 | 1.51897  | 0.19393  |    |          |          |          |
| H                                               | -1.71196 | 1.74897  | 1.26594  |    |          |          |          |
| C                                               | -3.22892 | -0.59406 | -0.05207 |    |          |          |          |

|   |          |          |          |   |          |          |          |
|---|----------|----------|----------|---|----------|----------|----------|
| C | -0.30795 | 1.11499  | -0.21707 | H | 0.32291  | 2.29904  | 2.45991  |
| H | 0.03704  | 1.42600  | -1.19707 | H | 2.01992  | 2.02511  | 2.00591  |
| H | -3.25299 | 2.94994  | -0.29107 | N | -3.53998 | -0.41312 | 0.39991  |
| O | 0.13007  | -0.02400 | 1.80594  | S | -1.82093 | -1.40905 | 2.38691  |
| N | -2.62494 | 0.40096  | 0.04994  | C | 1.16105  | -0.95593 | -0.32109 |
| S | -4.09190 | -1.95807 | -0.20106 | C | 1.84104  | -0.75890 | 0.88791  |
| C | 1.88007  | 0.01203  | 0.17694  | C | 1.76308  | -1.68890 | -1.35109 |
| C | 2.88907  | -0.13295 | 1.13793  | C | 3.11506  | -1.28784 | 1.06291  |
| C | 2.20707  | -0.20196 | -1.16907 | H | 1.35602  | -0.21792 | 1.69591  |
| C | 4.19307  | -0.45593 | 0.76494  | C | 3.04510  | -2.20485 | -1.17609 |
| H | 2.64406  | 0.01705  | 2.18493  | H | 1.24108  | -1.82692 | -2.29409 |
| C | 3.50807  | -0.53494 | -1.54506 | C | 3.72109  | -2.00482 | 0.02791  |
| H | 1.43507  | -0.12798 | -1.93006 | H | 3.63505  | -1.14582 | 2.00491  |
| C | 4.50908  | -0.65892 | -0.57907 | H | 3.51812  | -2.75783 | -1.98109 |
| H | 4.96408  | -0.55291 | 1.52493  | H | 4.72011  | -2.40878 | 0.16191  |
| H | 3.73808  | -0.70693 | -2.59206 |   |          |          |          |
| H | 5.52208  | -0.91890 | -0.87206 |   |          |          |          |

#### TS-PTON

Imaginary frequency: -285.8242 cm<sup>-1</sup>

#### TS-PTTN (TS-III)

Imaginary frequency: -325.0110 cm<sup>-1</sup>

|    |          |          |          |    |          |          |          |
|----|----------|----------|----------|----|----------|----------|----------|
| C  | -0.17798 | -0.36198 | -0.51209 | C  | 1.08706  | 3.32137  | -0.95992 |
| C  | -3.45095 | -1.02612 | -2.28509 | H  | 2.14807  | 3.28365  | -0.70592 |
| H  | -3.12796 | -0.89910 | -3.32709 | H  | 0.97210  | 3.16933  | -2.03892 |
| H  | -3.53191 | -2.09712 | -2.08409 | H  | 0.69579  | 4.32126  | -0.73892 |
| C  | -2.42098 | -0.38807 | -1.42109 | C  | 0.83758  | 1.42530  | 0.65508  |
| H  | -2.44602 | 0.69293  | -1.32609 | H  | 1.89157  | 1.45958  | 0.91808  |
| C  | -2.85196 | -0.82209 | 1.27591  | C  | 0.30634  | 2.28615  | -0.22392 |
| C  | -1.19795 | -1.02602 | -1.17109 | H  | -0.76765 | 2.26286  | -0.40792 |
| H  | -1.05991 | -2.07002 | -1.43309 | C  | 0.25788  | 0.31514  | 2.86908  |
| H  | -4.42397 | -0.54916 | -2.16909 | H  | -0.19287 | -0.60898 | 3.23008  |
| O  | -0.40303 | 0.84001  | -0.02209 | H  | 1.32487  | 0.34343  | 3.09208  |
| Si | 0.56091  | 2.28505  | -0.00109 | H  | -0.22635 | 1.16901  | 3.36308  |
| C  | -0.66914 | 3.56800  | -0.55709 | C  | 0.01283  | 0.48107  | 1.40808  |
| H  | -0.21518 | 4.56602  | -0.54109 | N  | 1.05532  | -1.30664 | 0.84608  |
| H  | -1.01313 | 3.36699  | -1.57809 | C  | 2.00332  | -1.29839 | 0.13808  |
| H  | -1.54214 | 3.58096  | 0.10491  | S  | 3.29831  | -1.26103 | -0.85692 |
| C  | 1.96692  | 2.09211  | -1.21209 | O  | -1.18308 | 0.18675  | 1.00708  |
| H  | 2.40388  | 3.08113  | -1.39909 | Si | -1.85990 | -0.50044 | -0.44992 |
| H  | 2.75995  | 1.43714  | -0.83809 | C  | -2.09041 | -2.29950 | -0.03592 |
| H  | 1.61194  | 1.70009  | -2.17209 | H  | -2.68028 | -2.78566 | -0.82092 |
| C  | 1.11190  | 2.58207  | 1.75491  | H  | -1.12727 | -2.81324 | 0.04008  |
| H  | 1.31986  | 3.64908  | 1.89491  | H  | -2.62438 | -2.41664 | 0.91308  |
|    |          |          |          | C  | -3.47415 | 0.41213  | -0.59692 |
|    |          |          |          | H  | -4.04504 | 0.02397  | -1.44892 |

|      |          |          |          |             |          |          |          |
|------|----------|----------|----------|-------------|----------|----------|----------|
| H    | -4.08311 | 0.28396  | 0.30408  | C           | 2.74602  | -0.96595 | 1.84796  |
| H    | -3.31344 | 1.48317  | -0.75792 | H           | 2.20701  | -0.46896 | 2.66196  |
| C    | -0.76697 | -0.25414 | -1.93892 | H           | 2.73705  | -2.04394 | 2.03296  |
| H    | -1.13578 | -0.92824 | -2.72192 | C           | 2.05202  | -0.63096 | 0.53896  |
| H    | -0.81224 | 0.76585  | -2.33092 | H           | 2.08599  | 0.43904  | 0.32796  |
| H    | 0.27810  | -0.51285 | -1.74592 | S           | 2.92704  | -1.43894 | -0.92204 |
|      |          |          |          | C           | 4.47702  | -0.77690 | -0.72404 |
|      |          |          |          | N           | 5.54301  | -0.32987 | -0.60304 |
| PTON |          |          |          | C           | 0.65303  | -1.14700 | 0.46796  |
| C    | 0.65660  | 3.58802  | -0.10102 | H           | 0.46505  | -2.14200 | 0.86196  |
| H    | -0.15742 | 3.85495  | 0.57698  | H           | 3.78002  | -0.61092 | 1.85996  |
| H    | 1.55855  | 4.13310  | 0.19998  | O           | -0.14002 | 0.75898  | -0.66304 |
| H    | 0.39957  | 3.93200  | -1.10902 | Si          | -0.51706 | 2.24097  | 0.11196  |
| C    | 0.19380  | 1.23598  | 0.60098  | C           | 0.35291  | 3.50800  | -0.94004 |
| H    | -0.61423 | 1.58191  | 1.24698  | H           | 0.18989  | 4.51499  | -0.54304 |
| C    | 0.90673  | 2.11104  | -0.10702 | H           | 1.43192  | 3.32102  | -0.96404 |
| H    | 1.71576  | 1.75711  | -0.74502 | H           | -0.02209 | 3.48499  | -1.96904 |
| C    | 0.44098  | -0.81900 | 2.02198  | C           | 0.15495  | 2.15799  | 1.85496  |
| H    | 0.53407  | -1.90699 | 1.98698  | H           | -0.10708 | 3.07598  | 2.39396  |
| H    | 1.29994  | -0.39092 | 2.54598  | H           | -0.27703 | 1.31598  | 2.40896  |
| H    | -0.47405 | -0.55207 | 2.55798  | H           | 1.24595  | 2.06102  | 1.86996  |
| C    | 0.35993  | -0.26900 | 0.59898  | C           | -2.36606 | 2.51393  | 0.14296  |
| N    | 1.58396  | -0.62790 | -0.08902 | H           | -2.57209 | 3.50292  | 0.57096  |
| C    | 2.74497  | -0.76580 | -0.23302 | H           | -2.79506 | 2.48692  | -0.86304 |
| S    | 4.30699  | -0.97667 | -0.51302 | H           | -2.88004 | 1.76891  | 0.75996  |
| O    | -0.67402 | -0.91509 | -0.10502 | C           | -1.76298 | -0.94106 | -0.11604 |
| Si   | -2.29906 | -0.45523 | -0.28602 | C           | -2.58298 | -0.59208 | -1.19704 |
| C    | -3.02693 | -1.91129 | -1.19802 | C           | -2.28496 | -1.74407 | 0.90696  |
| H    | -4.09795 | -1.75838 | -1.37102 | C           | -3.89597 | -1.05111 | -1.26204 |
| H    | -2.54292 | -2.04525 | -2.17202 | H           | -2.18400 | 0.03693  | -1.98804 |
| H    | -2.90385 | -2.83728 | -0.62502 | C           | -3.59994 | -2.20010 | 0.84096  |
| C    | -3.10608 | -0.23630 | 1.38898  | H           | -1.66795 | -1.99405 | 1.76596  |
| H    | -4.17409 | -0.02939 | 1.24898  | C           | -4.40795 | -1.85612 | -0.24304 |
| H    | -3.01600 | -1.14329 | 1.99598  | H           | -4.51998 | -0.78013 | -2.10804 |
| H    | -2.67915 | 0.60174  | 1.95198  | H           | -3.99693 | -2.81411 | 1.64396  |
| C    | -2.46119 | 1.10676  | -1.30902 | H           | -5.43394 | -2.20915 | -0.29104 |
| H    | -1.77719 | 1.08881  | -2.16502 |             |          |          |          |
| H    | -3.48420 | 1.17567  | -1.69802 | PT (Int-IV) |          |          |          |
| H    | -2.26027 | 2.01177  | -0.72802 | C           | 0.19721  | 0.84703  | -0.27205 |
|      |          |          |          | C           | 2.66578  | 3.75755  | -0.16505 |
| PTTS |          |          |          | H           | 1.92293  | 4.55769  | -0.17805 |
| C    | -0.36199 | -0.45102 | -0.07204 | H           | 3.29179  | 3.84742  | 0.73095  |

|    |          |          |          |    |          |          |          |
|----|----------|----------|----------|----|----------|----------|----------|
| H  | 3.34280  | 3.86842  | -1.02105 | O  | -0.44691 | 0.82895  | -0.74307 |
| C  | 0.71547  | 2.18693  | -0.23705 | Si | -1.40201 | 2.16388  | -0.26107 |
| H  | 0.00863  | 3.00907  | -0.24405 | C  | -1.16510 | 3.38490  | -1.64607 |
| C  | 2.04951  | 2.41267  | -0.20005 | H  | -1.72617 | 4.30485  | -1.44707 |
| H  | 2.72435  | 1.55654  | -0.19105 | H  | -0.10812 | 3.64998  | -1.76007 |
| Si | 1.27570  | -1.75518 | 0.17095  | H  | -1.52007 | 2.97187  | -2.59707 |
| O  | 1.02002  | -0.12113 | -0.45305 | C  | -0.73206 | 2.78493  | 1.37093  |
| C  | -0.03837 | -2.13092 | 1.43195  | H  | -1.32912 | 3.63789  | 1.71393  |
| H  | -0.98843 | -2.43674 | 0.98595  | H  | -0.78800 | 2.00993  | 2.14293  |
| H  | 0.32447  | -2.95600 | 2.05595  | H  | 0.30892  | 3.11701  | 1.28393  |
| H  | -0.21821 | -1.27389 | 2.09095  | C  | -3.19197 | 1.65974  | -0.07107 |
| C  | 1.27249  | -2.84318 | -1.33305 | H  | -3.78204 | 2.54170  | 0.20693  |
| H  | 1.61929  | -3.84325 | -1.05105 | H  | -3.60194 | 1.26071  | -1.00507 |
| H  | 0.27847  | -2.94399 | -1.77705 | H  | -3.32491 | 0.90673  | 0.71393  |
| H  | 1.95856  | -2.45232 | -2.09205 | N  | 3.13816  | -0.01978 | 0.09193  |
| C  | 2.95873  | -1.57751 | 0.93695  | S  | 5.33725  | -1.29061 | -1.04607 |
| H  | 2.94488  | -0.84051 | 1.74695  | C  | -1.38675 | -1.25912 | 0.01993  |
| H  | 3.28155  | -2.53657 | 1.35695  | C  | -2.16274 | -1.39718 | -1.13807 |
| H  | 3.69880  | -1.26665 | 0.19195  | C  | -1.68569 | -2.04614 | 1.13993  |
| C  | -1.23484 | 0.58631  | -0.15905 | C  | -3.20767 | -2.31626 | -1.18107 |
| C  | -1.79506 | -0.51658 | -0.82405 | H  | -1.94078 | -0.78216 | -2.00607 |
| C  | -2.05068 | 1.44347  | 0.59895  | C  | -2.73362 | -2.96322 | 1.09593  |
| C  | -3.15911 | -0.75732 | -0.73305 | H  | -1.11170 | -1.92410 | 2.05393  |
| H  | -1.17118 | -1.15570 | -1.44305 | C  | -3.49661 | -3.10228 | -0.06407 |
| C  | -3.40973 | 1.17673  | 0.70995  | H  | -3.79766 | -2.41830 | -2.08707 |
| H  | -1.61851 | 2.28738  | 1.12695  | H  | -2.96157 | -3.56124 | 1.97293  |
| C  | -3.96394 | 0.08284  | 0.04095  | H  | -4.31656 | -3.81334 | -0.09607 |
| H  | -3.59727 | -1.59623 | -1.26305 |    |          |          |          |
| H  | -4.03860 | 1.82186  | 1.31395  |    |          |          |          |
| H  | -5.02898 | -0.11295 | 0.11895  |    |          |          |          |

TS-PTOS

Imaginary frequency: -129.9882 cm<sup>-1</sup>

PTTN (Int-V)

|   |          |          |          |
|---|----------|----------|----------|
| C | -0.27082 | -0.27803 | 0.04193  |
| C | 2.39209  | 0.87917  | 2.20893  |
| H | 1.53605  | 1.32710  | 2.71993  |
| H | 2.69316  | -0.02381 | 2.74993  |
| C | 1.99012  | 0.52614  | 0.77693  |
| H | 1.70805  | 1.43112  | 0.23093  |
| C | 4.06220  | -0.56271 | -0.37807 |
| C | 0.86719  | -0.47095 | 0.72693  |
| H | 1.01026  | -1.39894 | 1.27393  |
| H | 3.22104  | 1.59123  | 2.21093  |

|   |          |          |          |
|---|----------|----------|----------|
| C | -2.98245 | -3.04727 | -1.51635 |
| H | -2.48223 | -3.98821 | -1.27356 |
| H | -3.97843 | -3.04558 | -1.05928 |
| H | -3.13454 | -2.99010 | -2.59933 |
| C | -1.03963 | -1.94906 | -0.38126 |
| H | -0.58340 | -2.90901 | -0.15547 |
| C | -2.20568 | -1.86719 | -1.03917 |
| H | -2.62292 | -0.88125 | -1.24495 |
| C | -0.30186 | -0.75498 | 0.03193  |
| C | -1.08194 | 0.38532  | 2.75020  |
| S | -0.60661 | -1.18752 | 2.48286  |
| N | -1.41518 | 1.49722  | 2.89943  |

|    |          |          |          |   |          |          |          |
|----|----------|----------|----------|---|----------|----------|----------|
| O  | -0.92212 | 0.38990  | -0.06781 | H | 2.26128  | -1.55842 | 2.18985  |
| Si | -0.57451 | 1.86815  | -0.93755 | H | 1.00518  | -1.56070 | 3.43978  |
| C  | 0.45550  | 1.39066  | -2.41671 | H | 0.62941  | -2.15479 | 1.81603  |
| H  | 0.05167  | 0.49767  | -2.90685 | C | 1.82569  | 1.61213  | 2.65422  |
| H  | 0.43128  | 2.21080  | -3.14455 | H | 1.52554  | 2.62346  | 2.36058  |
| H  | 1.50256  | 1.20484  | -2.15381 | H | 1.81662  | 1.55820  | 3.74854  |
| C  | -2.29665 | 2.40086  | -1.39834 | H | 2.85374  | 1.44742  | 2.31421  |
| H  | -2.91562 | 2.52255  | -0.50227 | C | -1.09113 | 0.65756  | 2.46529  |
| H  | -2.26790 | 3.36196  | -1.92415 | H | -1.10723 | 0.72464  | 3.55993  |
| H  | -2.77753 | 1.66788  | -2.05445 | H | -1.47126 | 1.60329  | 2.06500  |
| C  | 0.24529  | 3.12012  | 0.17164  | H | -1.77197 | -0.14722 | 2.16770  |
| H  | 0.02804  | 4.12014  | -0.22115 | C | -1.08069 | -0.48668 | -0.63741 |
| H  | -0.15664 | 3.06483  | 1.18966  | C | -1.31548 | -1.82491 | -0.30799 |
| H  | 1.33131  | 3.00135  | 0.21055  | C | -2.15884 | 0.40606  | -0.65345 |
| C  | 1.18313  | -0.74364 | -0.00316 | C | -2.60243 | -2.26237 | 0.01134  |
| C  | 1.86528  | -1.64233 | -0.82838 | H | -0.49236 | -2.53369 | -0.29199 |
| C  | 1.89496  | 0.23838  | 0.69998  | C | -3.44279 | -0.03144 | -0.34111 |
| C  | 3.25125  | -1.54400 | -0.96445 | H | -2.01201 | 1.45274  | -0.89825 |
| H  | 1.32041  | -2.39534 | -1.38949 | C | -3.66859 | -1.36762 | -0.00371 |
| C  | 3.27393  | 0.32871  | 0.56491  | H | -2.76527 | -3.30499 | 0.26712  |
| H  | 1.36585  | 0.91113  | 1.37114  | H | -4.26791 | 0.67433  | -0.36010 |
| C  | 3.95407  | -0.56098 | -0.27331 | H | -4.67155 | -1.70645 | 0.24010  |
| H  | 3.77536  | -2.23475 | -1.61762 |   |          |          |          |
| H  | 3.82180  | 1.08673  | 1.11702  |   |          |          |          |
| H  | 5.03205  | -0.48672 | -0.38036 |   |          |          |          |

TS-PTTS

Imaginary frequency: -189.4777 cm<sup>-1</sup>

PTOS

|    |          |          |          |
|----|----------|----------|----------|
| C  | 3.35971  | -2.46530 | -1.42209 |
| H  | 2.90087  | -3.00202 | -2.25615 |
| H  | 4.31267  | -2.04099 | -1.75837 |
| H  | 3.59578  | -3.18286 | -0.62807 |
| C  | 1.25248  | -1.11644 | -1.38574 |
| H  | 0.84764  | -1.68118 | -2.22565 |
| C  | 2.46449  | -1.38654 | -0.90014 |
| H  | 2.83932  | -0.79383 | -0.06638 |
| C  | 0.36225  | -0.02857 | -0.84384 |
| C  | 0.09982  | 2.67332  | -1.40287 |
| S  | 0.44313  | 1.27743  | -2.29211 |
| N  | -0.11240 | 3.64564  | -0.80227 |
| O  | 0.88605  | 0.61861  | 0.25162  |
| Si | 0.67097  | 0.34187  | 1.92617  |
| C  | 1.19324  | -1.39759 | 2.37188  |

|    |          |          |          |
|----|----------|----------|----------|
| C  | -0.33298 | -0.69907 | 0.20995  |
| C  | 2.51609  | -2.80597 | 1.54495  |
| H  | 2.26709  | -2.86198 | 2.61495  |
| H  | 2.24012  | -3.75998 | 1.08795  |
| C  | 1.73805  | -1.67500 | 0.97495  |
| H  | 2.13302  | -0.67098 | 1.10495  |
| S  | 3.01705  | -1.44996 | -1.36205 |
| C  | 3.27699  | 0.18505  | -1.16905 |
| N  | 3.46396  | 1.33206  | -1.01605 |
| C  | 0.40106  | -1.80804 | 0.63095  |
| H  | -0.07091 | -2.78506 | 0.62695  |
| H  | 3.59109  | -2.64394 | 1.46095  |
| O  | 0.29399  | 0.42896  | -0.00205 |
| Si | 0.02893  | 2.06695  | 0.52895  |
| C  | 0.15790  | 3.09795  | -1.01105 |
| H  | 0.18786  | 4.16095  | -0.74605 |
| H  | 1.07991  | 2.85698  | -1.55205 |

|   |          |          |          |
|---|----------|----------|----------|
| H | -0.69410 | 2.93892  | -1.67905 |
| C | 1.41992  | 2.36699  | 1.72995  |
| H | 1.36289  | 3.38799  | 2.12295  |
| H | 1.36095  | 1.67499  | 2.57795  |
| H | 2.38893  | 2.23802  | 1.23795  |
| C | -1.62407 | 2.17789  | 1.38595  |
| H | -1.66310 | 3.13489  | 1.92095  |
| H | -2.47107 | 2.14187  | 0.69595  |
| H | -1.74405 | 1.38089  | 2.12895  |
| C | -1.76697 | -0.77611 | -0.10505 |
| C | -2.29400 | 0.03787  | -1.11805 |
| C | -2.60595 | -1.66314 | 0.58695  |
| C | -3.64600 | -0.03617 | -1.43705 |
| H | -1.63902 | 0.70489  | -1.67205 |
| C | -3.96094 | -1.71818 | 0.27695  |
| H | -2.20392 | -2.28213 | 1.38395  |
| C | -4.47997 | -0.90820 | -0.73605 |
| H | -4.04802 | 0.58381  | -2.23205 |
| H | -4.61292 | -2.39020 | 0.82595  |
| H | -5.53697 | -0.95924 | -0.97905 |

PHTN (Int-II)

|   |          |          |          |
|---|----------|----------|----------|
| C | 0.35902  | 0.33489  | 0.52303  |
| C | -2.37199 | 2.83404  | -0.24344 |
| H | -1.77600 | 3.68997  | 0.08477  |
| H | -2.32496 | 2.77130  | -1.33446 |
| C | -1.80699 | 1.56790  | 0.38627  |
| H | -1.88601 | 1.63265  | 1.47729  |
| C | -3.00195 | -0.66298 | -0.17827 |
| C | -0.37398 | 1.31901  | -0.01776 |
| H | 0.06703  | 1.97319  | -0.76260 |
| H | -3.40899 | 2.98896  | 0.06257  |
| O | -0.20199 | -0.42434 | 1.50884  |
| N | -2.62597 | 0.43098  | 0.01299  |
| S | -3.57593 | -2.13991 | -0.46862 |
| H | 0.31002  | -1.23237 | 1.65966  |
| C | 1.76403  | 0.04199  | 0.14999  |
| C | 2.67902  | -0.38023 | 1.12391  |
| C | 2.19406  | 0.19030  | -1.17497 |
| C | 4.00503  | -0.63713 | 0.77887  |
| H | 2.36600  | -0.48547 | 2.15988  |
| C | 3.52007  | -0.06460 | -1.51600 |

|   |         |          |          |
|---|---------|----------|----------|
| H | 1.48407 | 0.48847  | -1.94091 |
| C | 4.42905 | -0.47982 | -0.54108 |
| H | 4.70702 | -0.95530 | 1.54281  |
| H | 3.84109 | 0.04764  | -2.54697 |
| H | 5.46106 | -0.68275 | -0.80911 |

TS-PHTS

Imaginary frequency: -149.3720 cm<sup>-1</sup>

|   |          |          |          |
|---|----------|----------|----------|
| C | -0.11994 | -0.57512 | 0.50295  |
| C | 3.06799  | -2.01027 | -0.96505 |
| H | 2.88093  | -3.09226 | -0.90805 |
| H | 2.91300  | -1.69426 | -1.99905 |
| C | 2.11502  | -1.34522 | -0.03605 |
| H | 2.35002  | -1.36823 | 1.02295  |
| S | 3.31713  | 1.04972  | 0.08295  |
| C | 1.83517  | 1.79079  | 0.06095  |
| N | 0.75119  | 2.23784  | 0.03595  |
| C | 0.82103  | -1.03816 | -0.41705 |
| H | 0.52103  | -1.13715 | -1.45505 |
| H | 4.10499  | -1.84132 | -0.67305 |
| O | 0.25206  | -0.46813 | 1.76295  |
| H | -0.41792 | -0.03410 | 2.31695  |
| C | -1.51493 | -0.28205 | 0.14095  |
| C | -2.53794 | -0.50100 | 1.07595  |
| C | -1.82991 | 0.19797  | -1.13905 |
| C | -3.86193 | -0.24793 | 0.72895  |
| H | -2.31296 | -0.90501 | 2.05895  |
| C | -3.15389 | 0.46003  | -1.47305 |
| H | -1.03990 | 0.40093  | -1.85505 |
| C | -4.17091 | 0.23508  | -0.54205 |
| H | -4.65094 | -0.43290 | 1.45095  |
| H | -3.39188 | 0.84704  | -2.45805 |
| H | -5.20390 | 0.43713  | -0.80905 |

TS-PHON

Imaginary frequency: -315.3124 cm<sup>-1</sup>

|   |          |         |          |
|---|----------|---------|----------|
| C | -2.03985 | 2.45211 | -1.74783 |
| H | -2.83990 | 2.75777 | -1.07073 |
| H | -1.61079 | 3.34035 | -2.22532 |
| H | -2.46380 | 1.83754 | -2.55019 |
| C | -0.97905 | 1.45900 | 0.28273  |

|   |          |          |          |
|---|----------|----------|----------|
| H | -1.78409 | 1.83069  | 0.91386  |
| C | -0.97193 | 1.69070  | -1.03915 |
| H | -0.14189 | 1.33601  | -1.64727 |
| C | 0.07588  | 0.74960  | 0.99344  |
| C | -1.89315 | -1.30223 | 0.76719  |
| O | 0.24179  | 1.18594  | 2.22369  |
| H | 0.92974  | 0.69167  | 2.70448  |
| C | 1.22892  | 0.11994  | 0.30220  |
| C | 2.52290  | 0.48570  | 0.69051  |
| C | 1.04599  | -0.77549 | -0.76029 |
| C | 3.62594  | -0.04497 | 0.02232  |
| H | 2.67885  | 1.20528  | 1.48990  |
| C | 2.14903  | -1.30317 | -1.41948 |
| H | 0.04301  | -1.07331 | -1.05153 |
| C | 3.44101  | -0.93941 | -1.02818 |
| H | 4.62692  | 0.24685  | 0.32455  |
| H | 2.00208  | -2.00373 | -2.23486 |
| H | 4.30004  | -1.35615 | -1.54533 |
| N | -0.98220 | -0.99662 | 1.46343  |
| S | -3.12708 | -1.67968 | -0.22012 |

TS-PHTN (TS-I)

Imaginary frequency: -320.3873 cm<sup>-1</sup>

|   |          |          |          |
|---|----------|----------|----------|
| C | -0.00097 | -0.51088 | 0.64909  |
| C | 3.16614  | -2.24090 | -0.47758 |
| H | 2.88822  | -3.28888 | -0.29835 |
| H | 3.07812  | -2.04613 | -1.54862 |
| C | 2.23009  | -1.39380 | 0.30825  |
| H | 2.42210  | -1.29356 | 1.37223  |
| C | 2.55090  | 1.29511  | -0.25333 |
| C | 0.92307  | -1.16698 | -0.14178 |
| H | 0.64208  | -1.44122 | -1.15272 |
| H | 4.19814  | -2.10376 | -0.15562 |
| O | 0.41301  | -0.02060 | 1.80998  |
| N | 3.30296  | 0.45024  | 0.10385  |
| S | 1.42682  | 2.35892  | -0.75154 |
| H | -0.32100 | 0.28946  | 2.36592  |
| C | -1.41398 | -0.33306 | 0.26907  |
| C | -2.12506 | 0.79898  | 0.69484  |
| C | -2.05392 | -1.30327 | -0.51472 |
| C | -3.45907 | 0.95881  | 0.33282  |
| H | -1.63210 | 1.57614  | 1.27366  |

|   |          |          |          |
|---|----------|----------|----------|
| C | -3.38994 | -1.14044 | -0.86674 |
| H | -1.51486 | -2.19230 | -0.82553 |
| C | -4.09301 | -0.01140 | -0.44597 |
| H | -4.00013 | 1.84384  | 0.65063  |
| H | -3.88489 | -1.90060 | -1.46357 |
| H | -5.13503 | 0.11447  | -0.72398 |

PHON

Imaginary frequency: -10.2852 cm<sup>-1</sup>

|   |          |          |          |
|---|----------|----------|----------|
| C | 0.75427  | 3.72098  | -1.21713 |
| H | -0.00669 | 4.35304  | -0.75113 |
| H | 1.73930  | 4.16691  | -1.04213 |
| H | 0.59427  | 3.71999  | -2.30113 |
| C | -0.15587 | 1.90605  | 0.23587  |
| H | -0.90282 | 2.57910  | 0.65687  |
| C | 0.71216  | 2.32298  | -0.68513 |
| H | 1.44211  | 1.62393  | -1.09213 |
| C | -0.23597 | 0.49706  | 0.78987  |
| C | -2.54305 | -0.49978 | 0.04287  |
| O | -0.24696 | 0.62806  | 2.18887  |
| H | -0.25303 | -0.25194 | 2.59987  |
| C | 0.88396  | -0.42203 | 0.30687  |
| C | 2.10696  | -0.39012 | 0.98387  |
| C | 0.73590  | -1.23302 | -0.81913 |
| C | 3.17090  | -1.17320 | 0.53987  |
| H | 2.22601  | 0.25087  | 1.85187  |
| C | 1.80384  | -2.01410 | -1.26113 |
| H | -0.20710 | -1.25695 | -1.35813 |
| C | 3.02084  | -1.98819 | -0.58313 |
| H | 4.11691  | -1.14627 | 1.07287  |
| H | 1.67979  | -2.64509 | -2.13713 |
| H | 3.84980  | -2.59825 | -0.92813 |
| N | -1.51101 | -0.05385 | 0.37687  |
| S | -3.95309 | -1.11267 | -0.42013 |

PH (Int-I)

|   |          |          |          |
|---|----------|----------|----------|
| C | -0.70587 | 0.57396  | -0.07494 |
| C | -4.22897 | -0.85880 | 0.19706  |
| H | -3.93204 | -1.84382 | 0.55806  |
| H | -4.90494 | -0.38575 | 0.92006  |
| H | -4.80298 | -0.95876 | -0.73194 |

|   |          |          |          |   |         |          |          |
|---|----------|----------|----------|---|---------|----------|----------|
| C | -1.78194 | -0.33897 | 0.15906  | H | 4.06891 | -1.62716 | 0.75106  |
| H | -1.54100 | -1.33698 | 0.50506  | H | 3.63101 | 2.16085  | -1.23794 |
| C | -3.07091 | 0.03012  | -0.03694 | H | 5.07596 | 0.29681  | -0.45993 |
| H | -3.28484 | 1.03614  | -0.39594 |   |         |          |          |
| O | -1.03179 | 1.80698  | -0.31194 |   |         |          |          |
| H | -0.28175 | 2.37693  | -0.56094 |   |         |          |          |
| C | 0.69210  | 0.17186  | -0.02594 |   |         |          |          |
| C | 1.70017  | 1.12380  | 0.22106  |   |         |          |          |
| C | 1.03701  | -1.17716 | -0.22894 |   |         |          |          |
| C | 3.02814  | 0.72670  | 0.26806  |   |         |          |          |
| H | 1.45624  | 2.16381  | 0.41906  |   |         |          |          |
| C | 2.37098  | -1.56025 | -0.19694 |   |         |          |          |
| H | 0.27296  | -1.91611 | -0.44294 |   |         |          |          |
| C | 3.36405  | -0.61332 | 0.05606  |   |         |          |          |
| H | 3.80119  | 1.45765  | 0.47706  |   |         |          |          |
| H | 2.63691  | -2.59827 | -0.36894 |   |         |          |          |
| H | 4.40603  | -0.91839 | 0.09106  |   |         |          |          |

#### TS-PHOS

Imaginary frequency: -140.1976 cm<sup>-1</sup>

|   |          |          |          |
|---|----------|----------|----------|
| C | -3.27598 | 2.37803  | -0.23194 |
| H | -2.93898 | 2.70602  | -1.21694 |
| H | -4.23100 | 1.84905  | -0.33893 |
| H | -3.47296 | 3.25503  | 0.39406  |
| C | -1.11702 | 1.11797  | -0.13594 |
| H | -0.84901 | 1.44897  | -1.13494 |
| C | -2.28201 | 1.48600  | 0.42706  |
| H | -2.52602 | 1.12301  | 1.42406  |
| C | -0.19504 | 0.20995  | 0.52207  |
| C | -2.35909 | -1.66500 | -0.40593 |
| S | -0.76509 | -1.76904 | -0.87894 |
| N | -3.46309 | -1.52597 | -0.04494 |
| O | -0.58605 | -0.21904 | 1.70707  |
| H | 0.11994  | -0.67706 | 2.19507  |
| C | 1.25696  | 0.20891  | 0.21207  |
| C | 2.07593  | -0.84111 | 0.65507  |
| C | 1.82299  | 1.28790  | -0.47493 |
| C | 3.44293  | -0.80714 | 0.41407  |
| H | 1.64491  | -1.70410 | 1.16006  |
| C | 3.19699  | 1.31686  | -0.71193 |
| H | 1.20701  | 2.11591  | -0.80693 |
| C | 4.00696  | 0.27284  | -0.27093 |

#### PHTS

|   |          |          |          |
|---|----------|----------|----------|
| C | -0.52501 | 0.54097  | 0.07611  |
| C | 2.55299  | -0.39801 | 1.95511  |
| H | 2.08799  | 0.04499  | 2.84211  |
| H | 2.44700  | -1.48601 | 2.01411  |
| C | 1.85299  | 0.14799  | 0.72311  |
| H | 1.98098  | 1.22899  | 0.63711  |
| S | 2.61899  | -0.55501 | -0.85389 |
| C | 4.22299  | -0.04100 | -0.65089 |
| N | 5.32499  | 0.30701  | -0.52289 |
| C | 0.41399  | -0.23603 | 0.64411  |
| H | 0.11800  | -1.18603 | 1.07911  |
| H | 3.61499  | -0.14200 | 1.96411  |
| O | -0.16802 | 1.76297  | -0.40889 |
| H | -0.86702 | 2.13397  | -0.96689 |
| C | -1.95801 | 0.16796  | -0.01089 |
| C | -2.95002 | 1.14595  | 0.14411  |
| C | -2.33500 | -1.16104 | -0.24289 |
| C | -4.29702 | 0.79594  | 0.07811  |
| H | -2.67402 | 2.17795  | 0.34311  |
| C | -3.68300 | -1.50705 | -0.30789 |
| H | -1.57200 | -1.92004 | -0.39189 |
| C | -4.66700 | -0.53006 | -0.14789 |
| H | -5.05702 | 1.55994  | 0.20811  |
| H | -3.96399 | -2.53806 | -0.49489 |
| H | -5.71700 | -0.80007 | -0.20189 |

#### PHOS

|   |         |          |          |
|---|---------|----------|----------|
| C | 4.06513 | -1.68103 | -0.37219 |
| H | 3.80113 | -1.98803 | -1.38719 |
| H | 4.98814 | -1.09203 | -0.41119 |
| H | 4.28513 | -2.57503 | 0.22081  |
| C | 1.80914 | -0.60902 | -0.33119 |
| H | 1.60314 | -0.95202 | -1.34319 |
| C | 2.97014 | -0.88703 | 0.26581  |
| H | 3.14314 | -0.53003 | 1.27981  |
| C | 0.70414 | 0.17798  | 0.31781  |



|           |          |          |          |      |          |          |          |
|-----------|----------|----------|----------|------|----------|----------|----------|
| C         | -0.66285 | 2.53098  | -0.09519 | H    | 5.90300  | 1.58800  | 0.05500  |
| S         | 0.78914  | 1.86298  | -0.65519 | C    | 1.18600  | -0.99000 | 0.00100  |
| N         | -1.65985 | 2.98499  | 0.29381  | O    | 1.19400  | -2.21900 | 0.05300  |
| O         | 1.00714  | 0.42398  | 1.63881  | C    | -0.07600 | -0.22500 | -0.09000 |
| H         | 0.28014  | 0.88998  | 2.08281  | C    | -1.25600 | -0.84600 | 0.08500  |
| C         | -0.66586 | -0.45102 | 0.10381  | H    | -0.01700 | 0.83600  | -0.30700 |
| C         | -1.39286 | -0.91802 | 1.20081  | H    | -1.23800 | -1.91200 | 0.31000  |
| C         | -1.18786 | -0.61401 | -1.18519 | C    | -2.58900 | -0.24000 | 0.01400  |
| C         | -2.63387 | -1.53101 | 1.01081  | C    | -3.70300 | -1.05100 | 0.28200  |
| H         | -0.99686 | -0.82402 | 2.20681  | C    | -2.79900 | 1.11200  | -0.30900 |
| C         | -2.42186 | -1.22801 | -1.37119 | C    | -4.99400 | -0.52900 | 0.23400  |
| H         | -0.63486 | -0.25302 | -2.04919 | H    | -3.54800 | -2.09800 | 0.53000  |
| C         | -3.15187 | -1.68601 | -0.27119 | C    | -4.08700 | 1.63200  | -0.35700 |
| H         | -3.18987 | -1.88701 | 1.87281  | H    | -1.95500 | 1.76000  | -0.52600 |
| H         | -2.81587 | -1.34501 | -2.37619 | C    | -5.18800 | 0.81400  | -0.08500 |
| H         | -4.11687 | -2.16101 | -0.41719 | H    | -5.84500 | -1.16900 | 0.44500  |
|           |          |          |          | H    | -4.23700 | 2.67800  | -0.60900 |
|           |          |          |          | H    | -6.19300 | 1.22500  | -0.12400 |
| EtO anion |          |          |          |      |          |          |          |
| C         | -0.00000 | 0.53600  | 0.00000  | CNCS |          |          |          |
| H         | 0.22700  | 1.17900  | 0.88100  | C    | 3.99700  | -1.87700 | 1.25300  |
| H         | 0.22700  | 1.17900  | -0.88100 | C    | 2.76100  | -1.44600 | 0.77600  |
| C         | 1.02900  | -0.60000 | 0.00000  | C    | 2.69700  | -0.43300 | -0.18800 |
| H         | 0.89500  | -1.23200 | -0.88600 | C    | 3.88000  | 0.14500  | -0.66600 |
| H         | 2.06100  | -0.22200 | 0.00000  | C    | 5.11300  | -0.28400 | -0.18500 |
| H         | 0.89500  | -1.23200 | 0.88600  | C    | 5.17200  | -1.29700 | 0.77500  |
| O         | -1.31000 | 0.08900  | 0.00000  | H    | 4.04300  | -2.66500 | 1.99900  |
|           |          |          |          | H    | 1.85500  | -1.90700 | 1.15700  |
|           |          |          |          | H    | 3.82300  | 0.93100  | -1.41300 |
| OH anion  |          |          |          | H    | 6.02700  | 0.16800  | -0.55700 |
| O         | 0.00000  | 0.00000  | 0.10700  | H    | 6.13400  | -1.63400 | 1.14900  |
| H         | 0.00000  | 0.00000  | -0.85800 | C    | 1.39400  | 0.05100  | -0.73700 |
|           |          |          |          | O    | 1.36100  | 0.89800  | -1.61800 |
| CL        |          |          |          | C    | -2.39600 | -0.63200 | -0.32900 |
| C         | 3.78800  | 1.75600  | 0.42200  | C    | -2.87300 | -1.67900 | -1.12000 |
| C         | 2.55600  | 1.10500  | 0.39800  | C    | -3.03800 | -0.32500 | 0.87300  |
| C         | 2.47900  | -0.23900 | 0.01000  | C    | -3.98500 | -2.41600 | -0.71200 |
| C         | 3.64800  | -0.92000 | -0.35600 | H    | -2.37400 | -1.91500 | -2.05700 |
| C         | 4.87400  | -0.26300 | -0.34700 | C    | -4.15200 | -1.06000 | 1.27800  |
| C         | 4.94600  | 1.07600  | 0.04400  | H    | -2.67300 | 0.49200  | 1.49100  |
| H         | 3.84300  | 2.79400  | 0.73600  | C    | -4.62700 | -2.10700 | 0.48700  |
| H         | 1.66500  | 1.64400  | 0.70600  | H    | -4.35200 | -3.22600 | -1.33600 |
| H         | 3.58300  | -1.96100 | -0.65500 | H    | -4.65000 | -0.81200 | 2.21100  |
| H         | 5.77500  | -0.79200 | -0.64400 |      |          |          |          |

|   |          |          |          |   |          |          |          |
|---|----------|----------|----------|---|----------|----------|----------|
| H | -5.49600 | -2.67600 | 0.80200  | N | 3.65000  | 2.80000  | -0.27300 |
| C | -1.14600 | 0.10800  | -0.77100 | C | -0.38700 | -0.28000 | 0.04300  |
| H | -1.08700 | 0.09800  | -1.86400 | H | -0.40300 | -1.19900 | 0.64400  |
| N | -1.19800 | 1.48000  | -0.36800 | H | -0.50100 | -0.60100 | -0.99900 |
| C | -1.07100 | 2.56500  | 0.05500  |   |          |          |          |
| S | -0.93600 | 4.06600  | 0.61700  |   |          |          |          |
| C | 0.11300  | -0.54500 | -0.18900 |   |          |          |          |
| H | 0.09600  | -1.61400 | -0.43300 |   |          |          |          |
| H | 0.09800  | -0.46500 | 0.90400  |   |          |          |          |

CSCN

|   |          |          |          |
|---|----------|----------|----------|
| C | -4.44200 | -1.75600 | -0.53700 |
| C | -3.14900 | -1.27900 | -0.32800 |
| C | -2.95200 | 0.00200  | 0.20300  |
| C | -4.06100 | 0.79900  | 0.51900  |
| C | -5.34900 | 0.32300  | 0.30500  |
| C | -5.54100 | -0.95700 | -0.22300 |
| H | -4.58900 | -2.75100 | -0.94500 |
| H | -2.30500 | -1.91500 | -0.57600 |
| H | -3.90100 | 1.79100  | 0.93000  |
| H | -6.20500 | 0.94500  | 0.54800  |
| H | -6.54700 | -1.33000 | -0.38900 |
| C | -1.58600 | 0.55200  | 0.45600  |
| O | -1.43700 | 1.63700  | 0.99800  |
| C | 2.13600  | -0.51900 | 0.23600  |
| C | 3.10100  | -0.44400 | 1.24400  |
| C | 2.29800  | -1.44900 | -0.79900 |
| C | 4.20800  | -1.29400 | 1.22800  |
| H | 2.98200  | 0.28100  | 2.04600  |
| C | 3.40300  | -2.29600 | -0.81500 |
| H | 1.56500  | -1.50900 | -1.60000 |
| C | 4.36000  | -2.22200 | 0.20000  |
| H | 4.95000  | -1.22700 | 2.01900  |
| H | 3.51800  | -3.01500 | -1.62100 |
| H | 5.22100  | -2.88400 | 0.18500  |
| C | 0.95200  | 0.41100  | 0.28600  |
| H | 0.92500  | 0.93800  | 1.24200  |
| C | 2.61300  | 2.36700  | -0.56600 |
| S | 1.10100  | 1.75200  | -1.01800 |



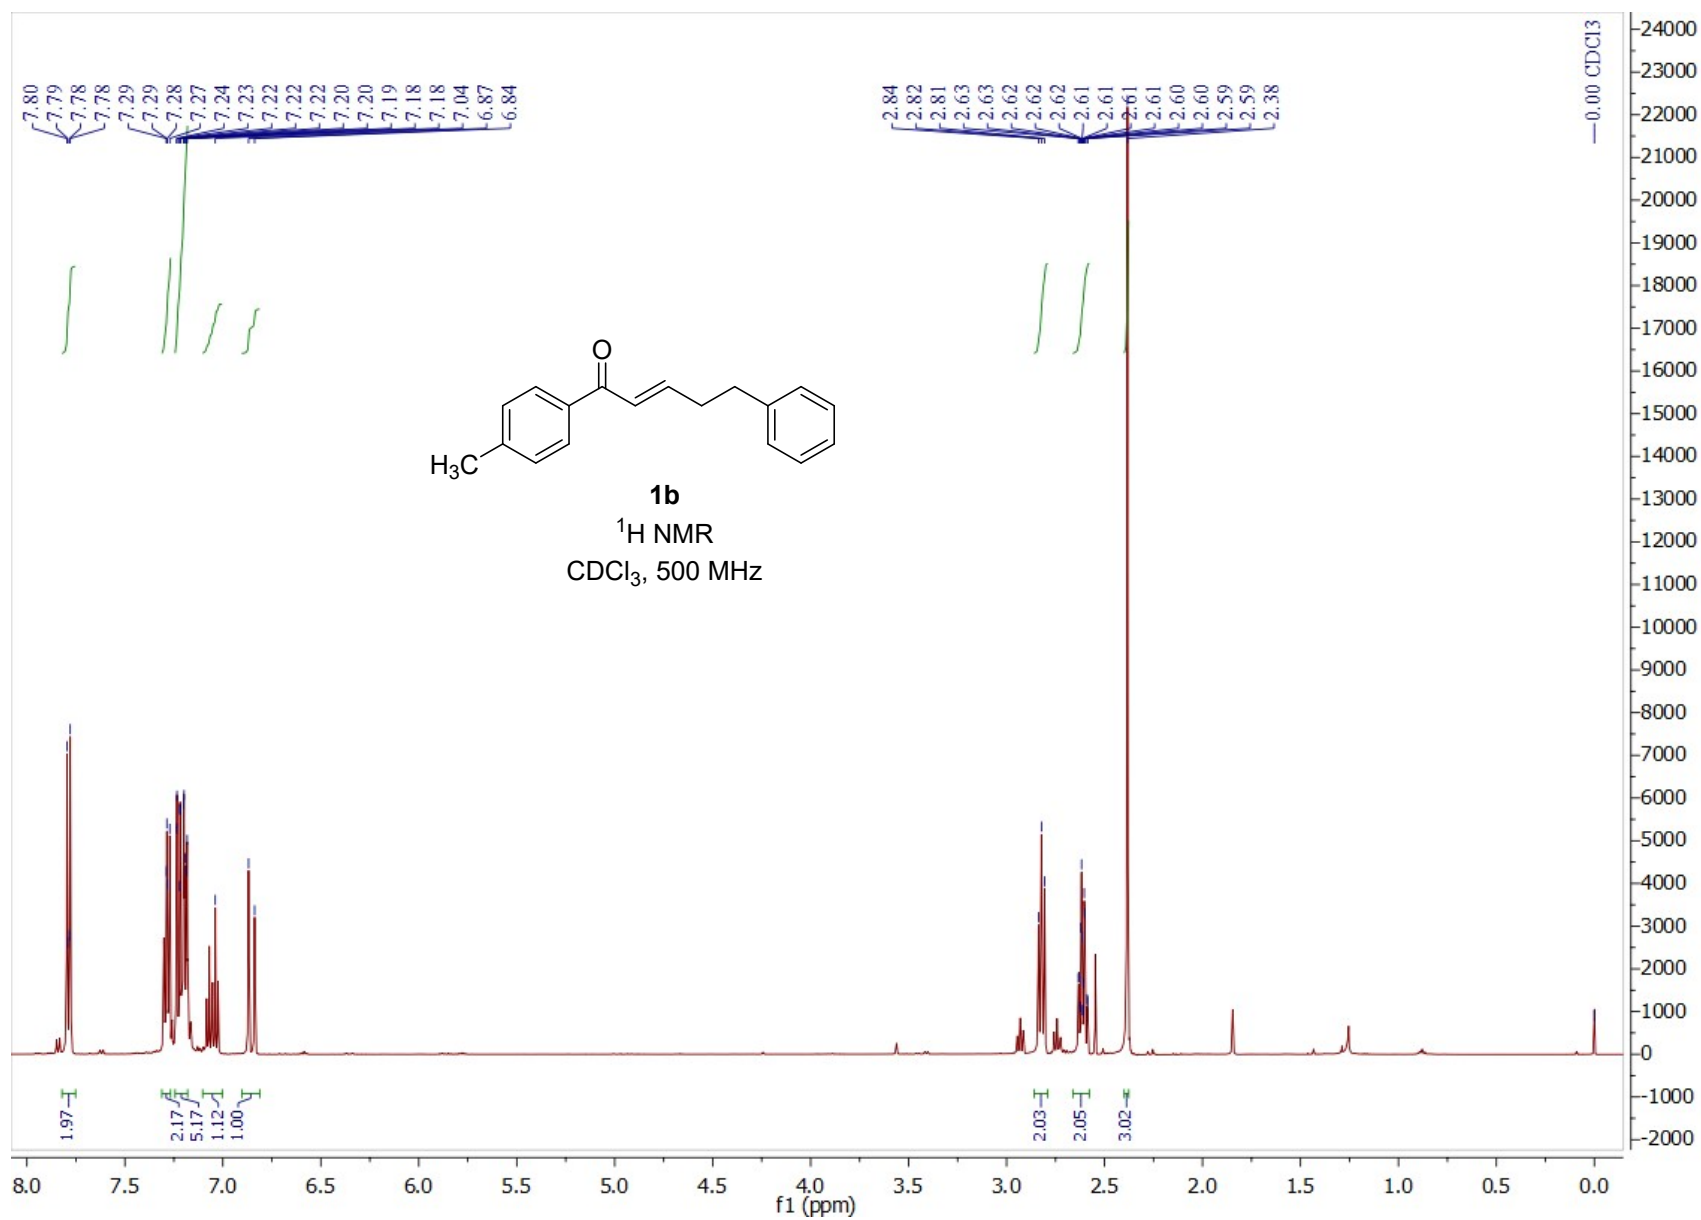

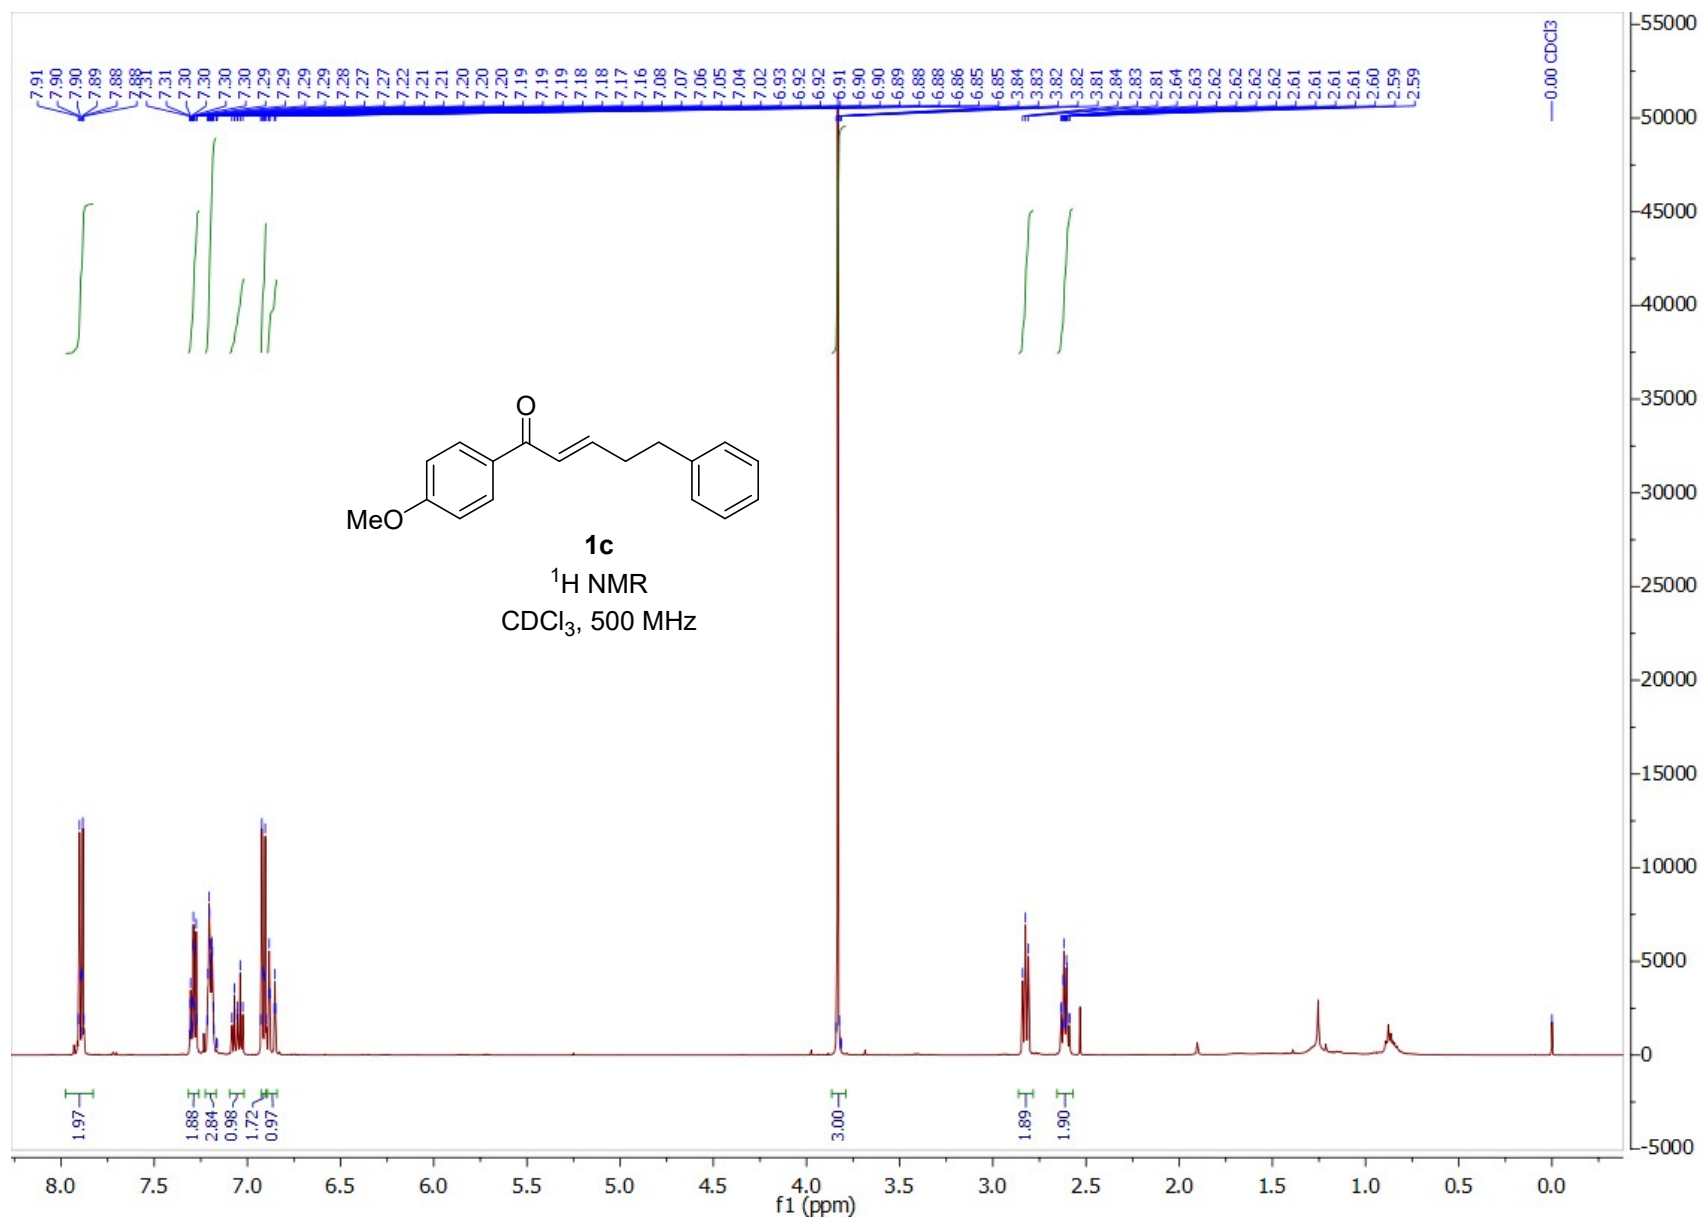

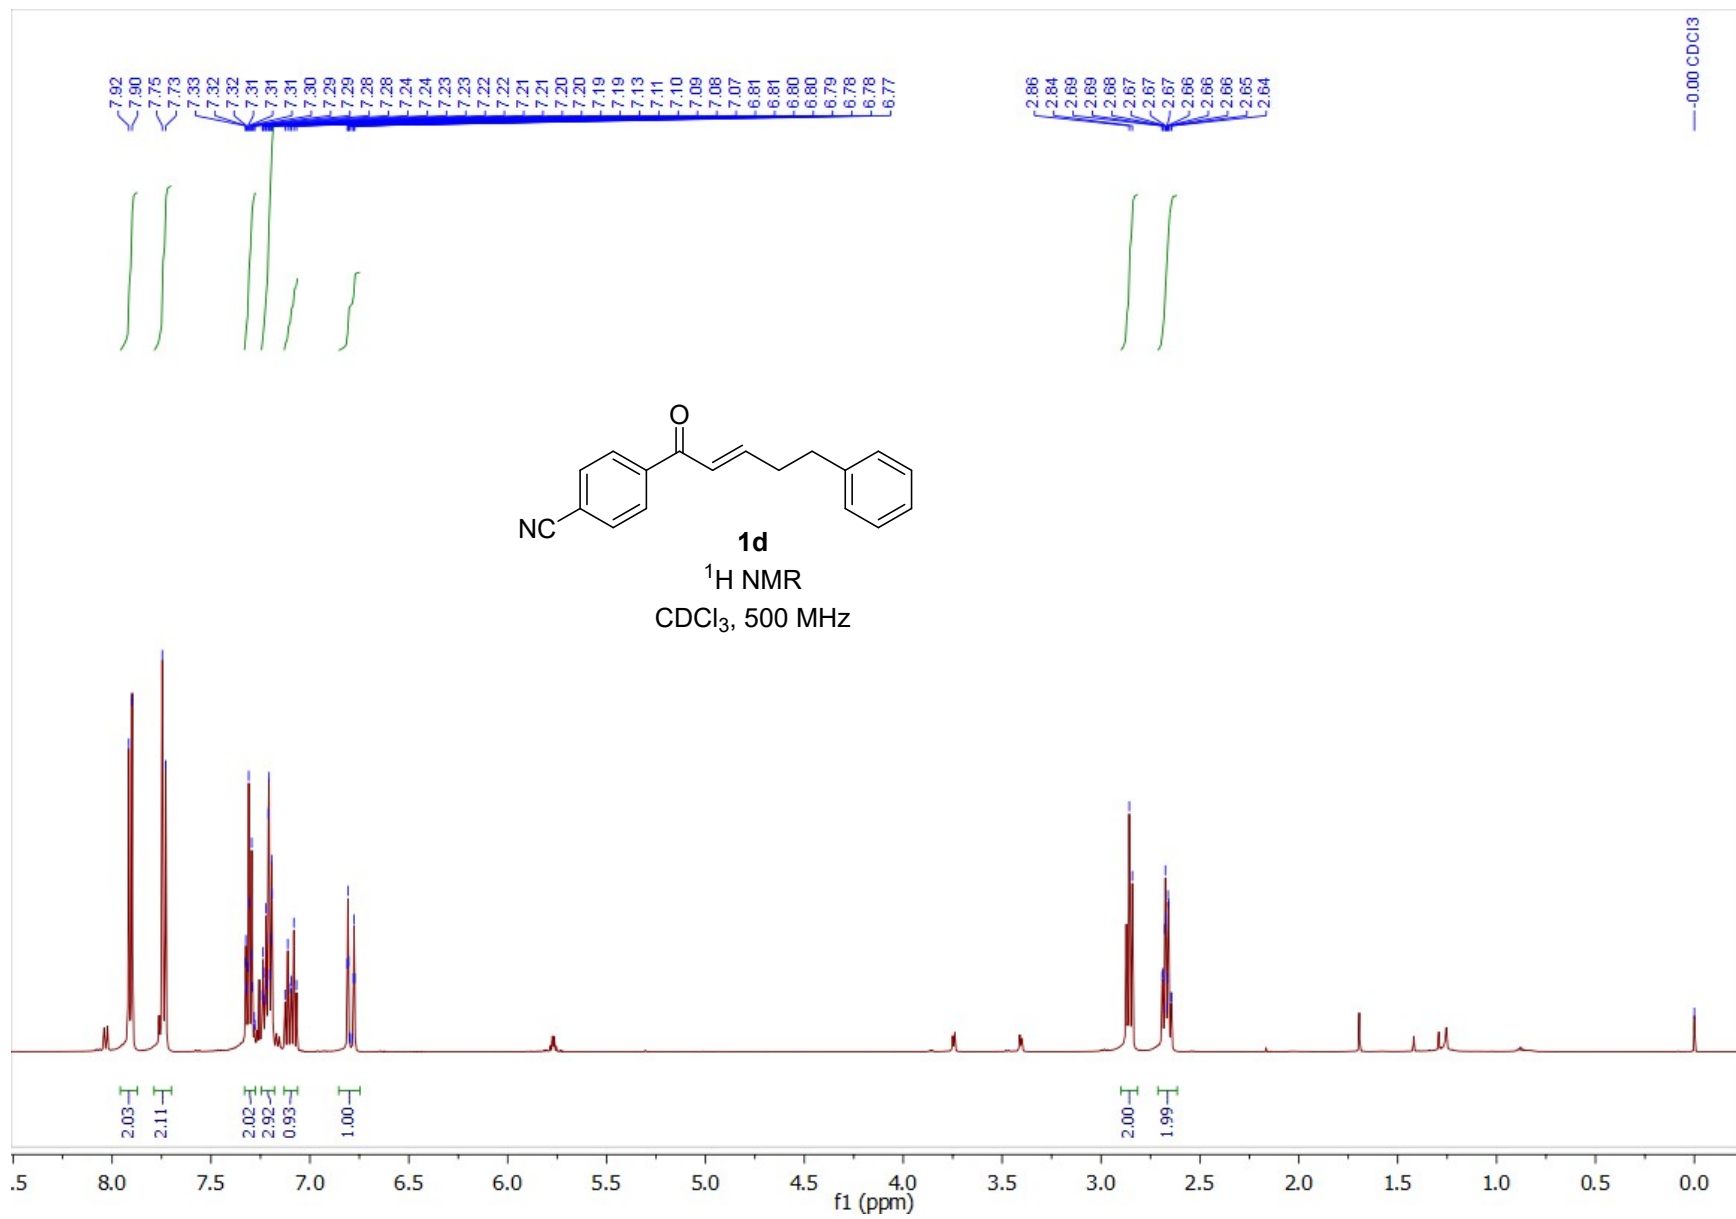

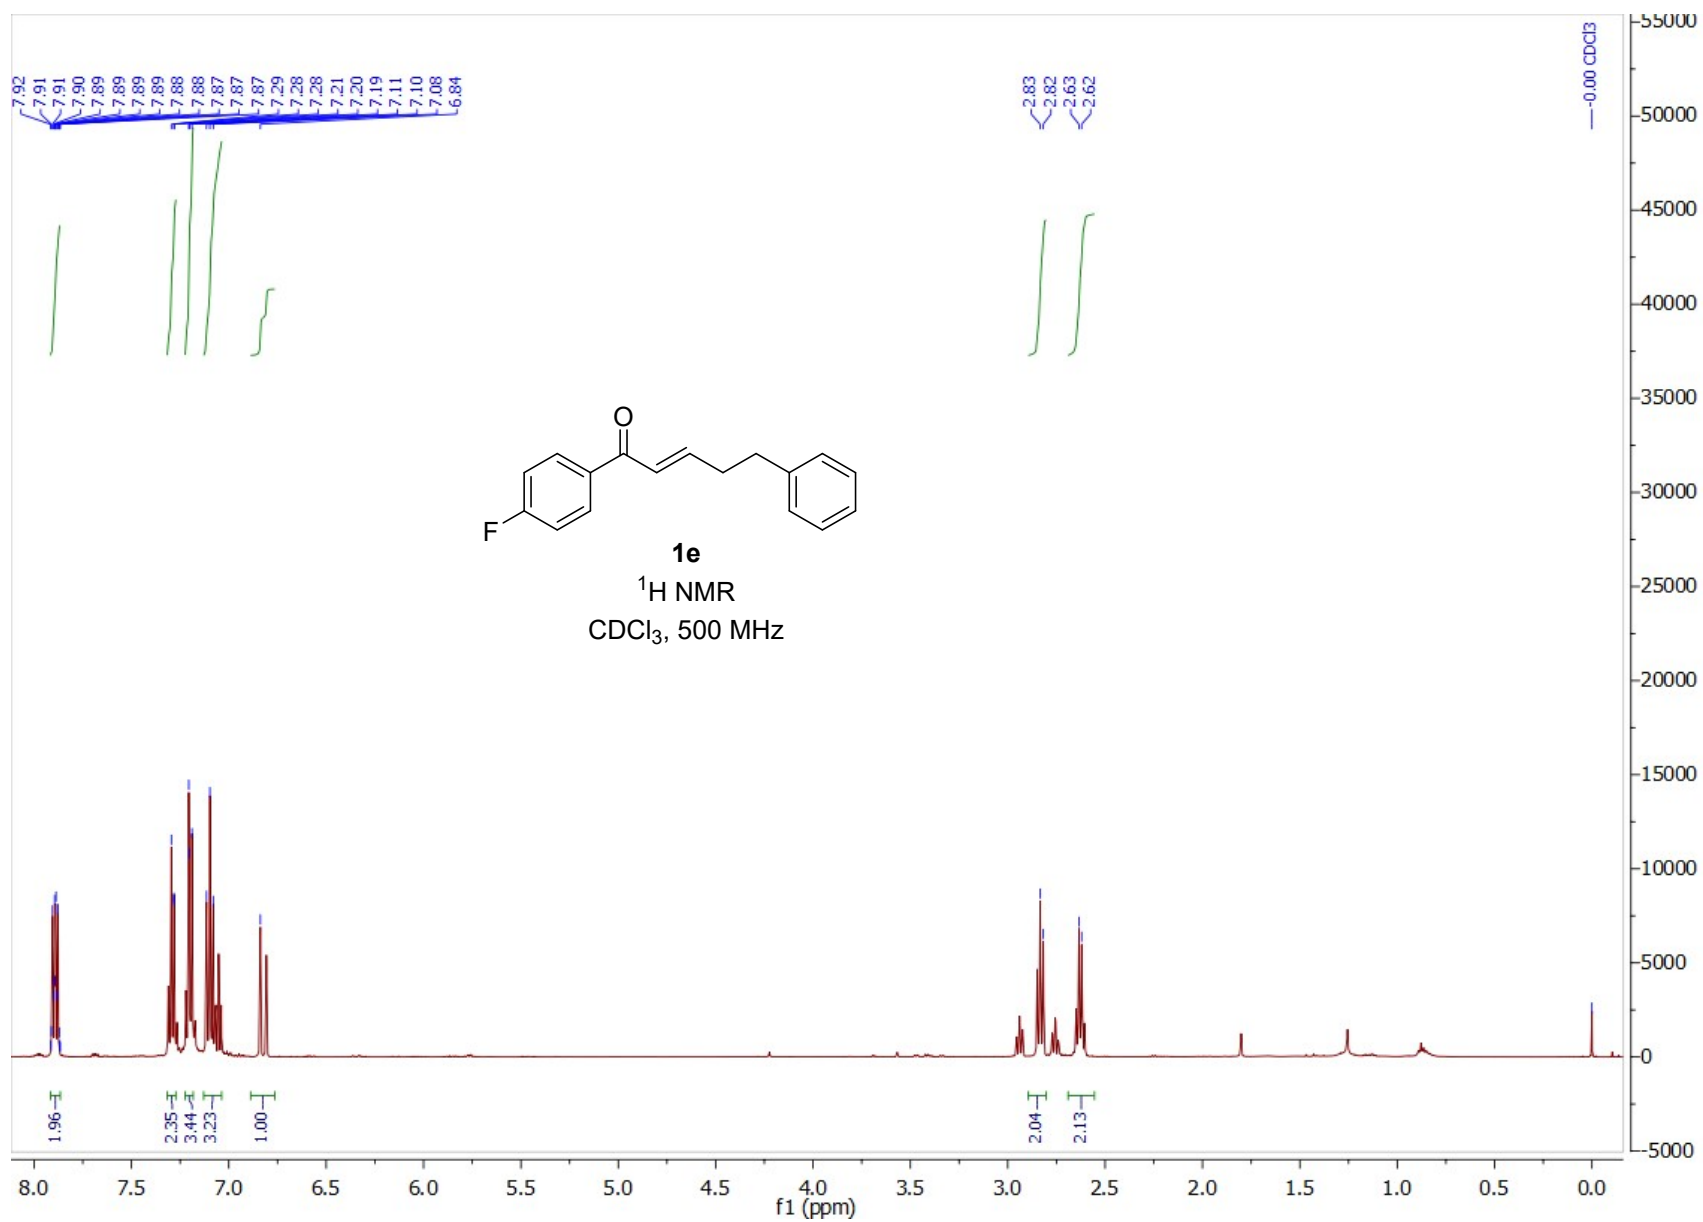

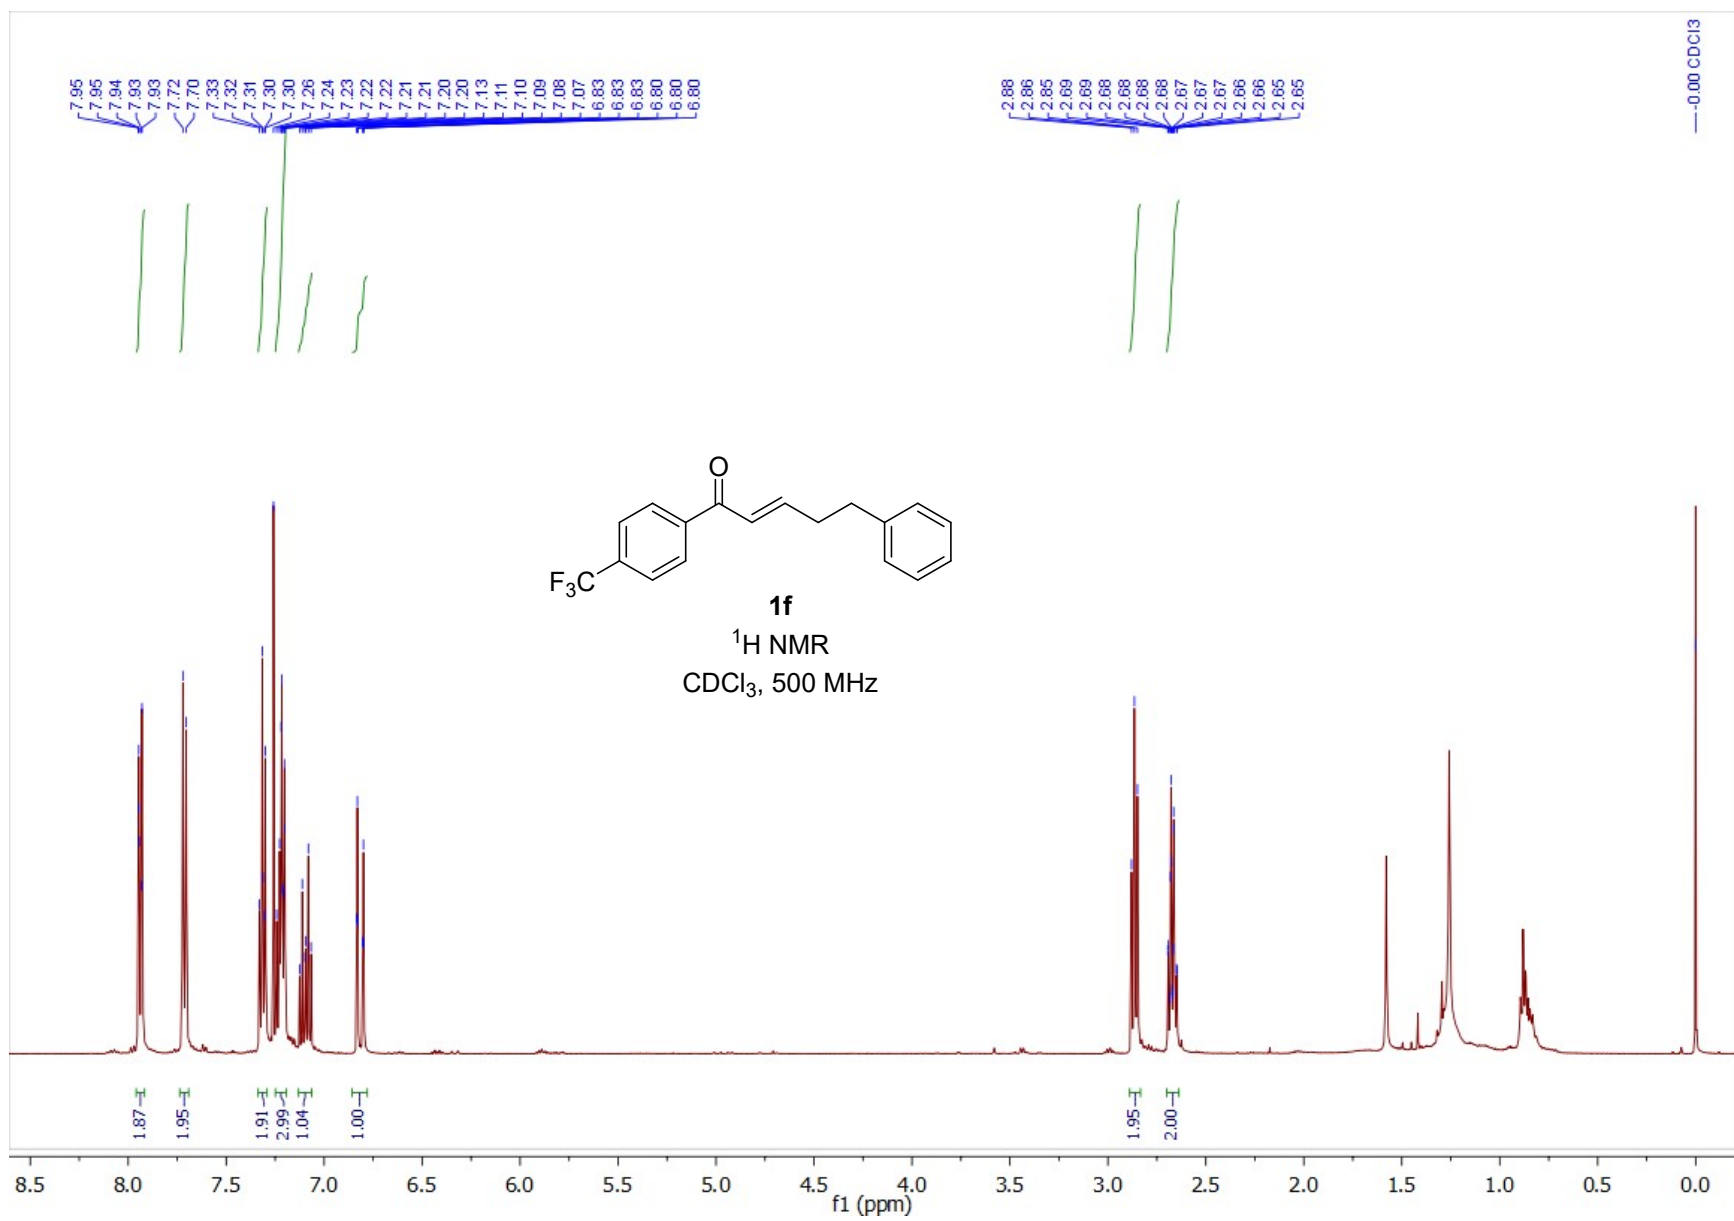



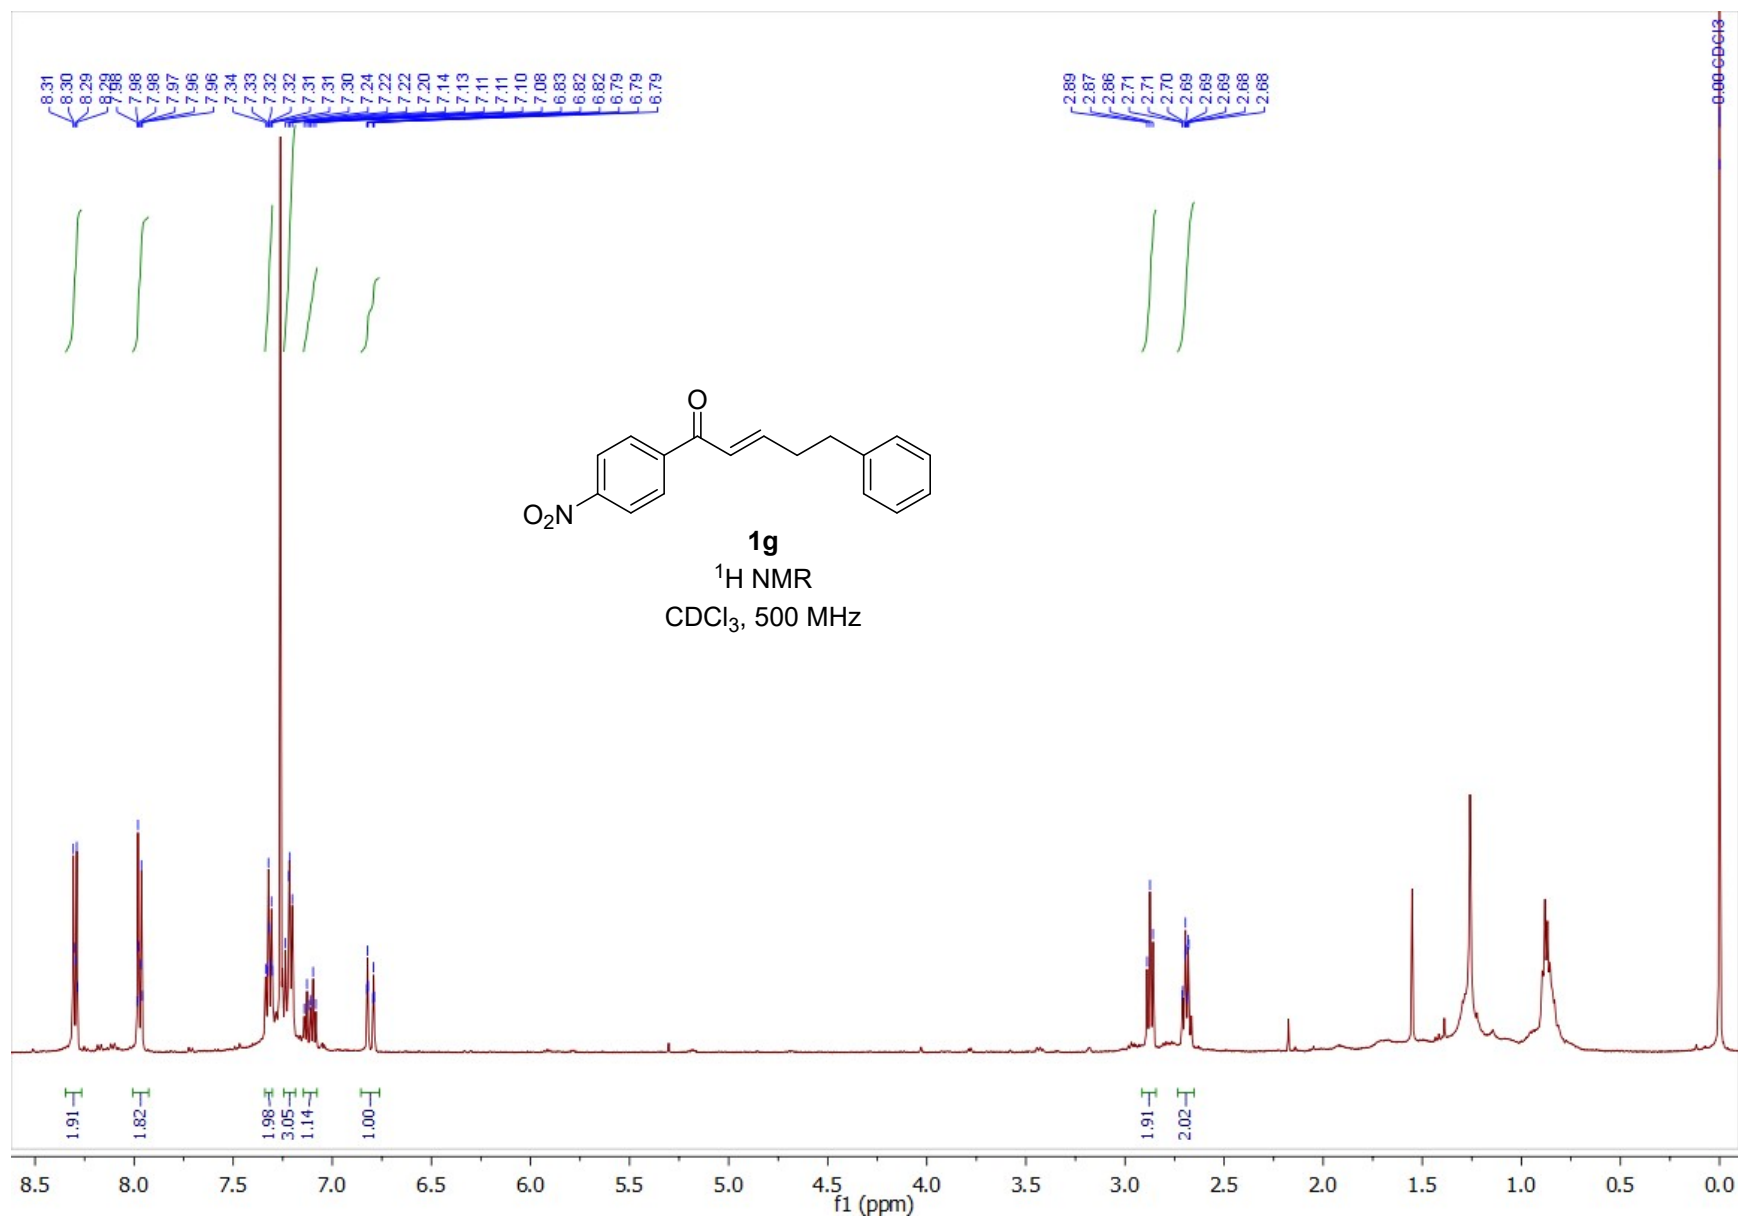

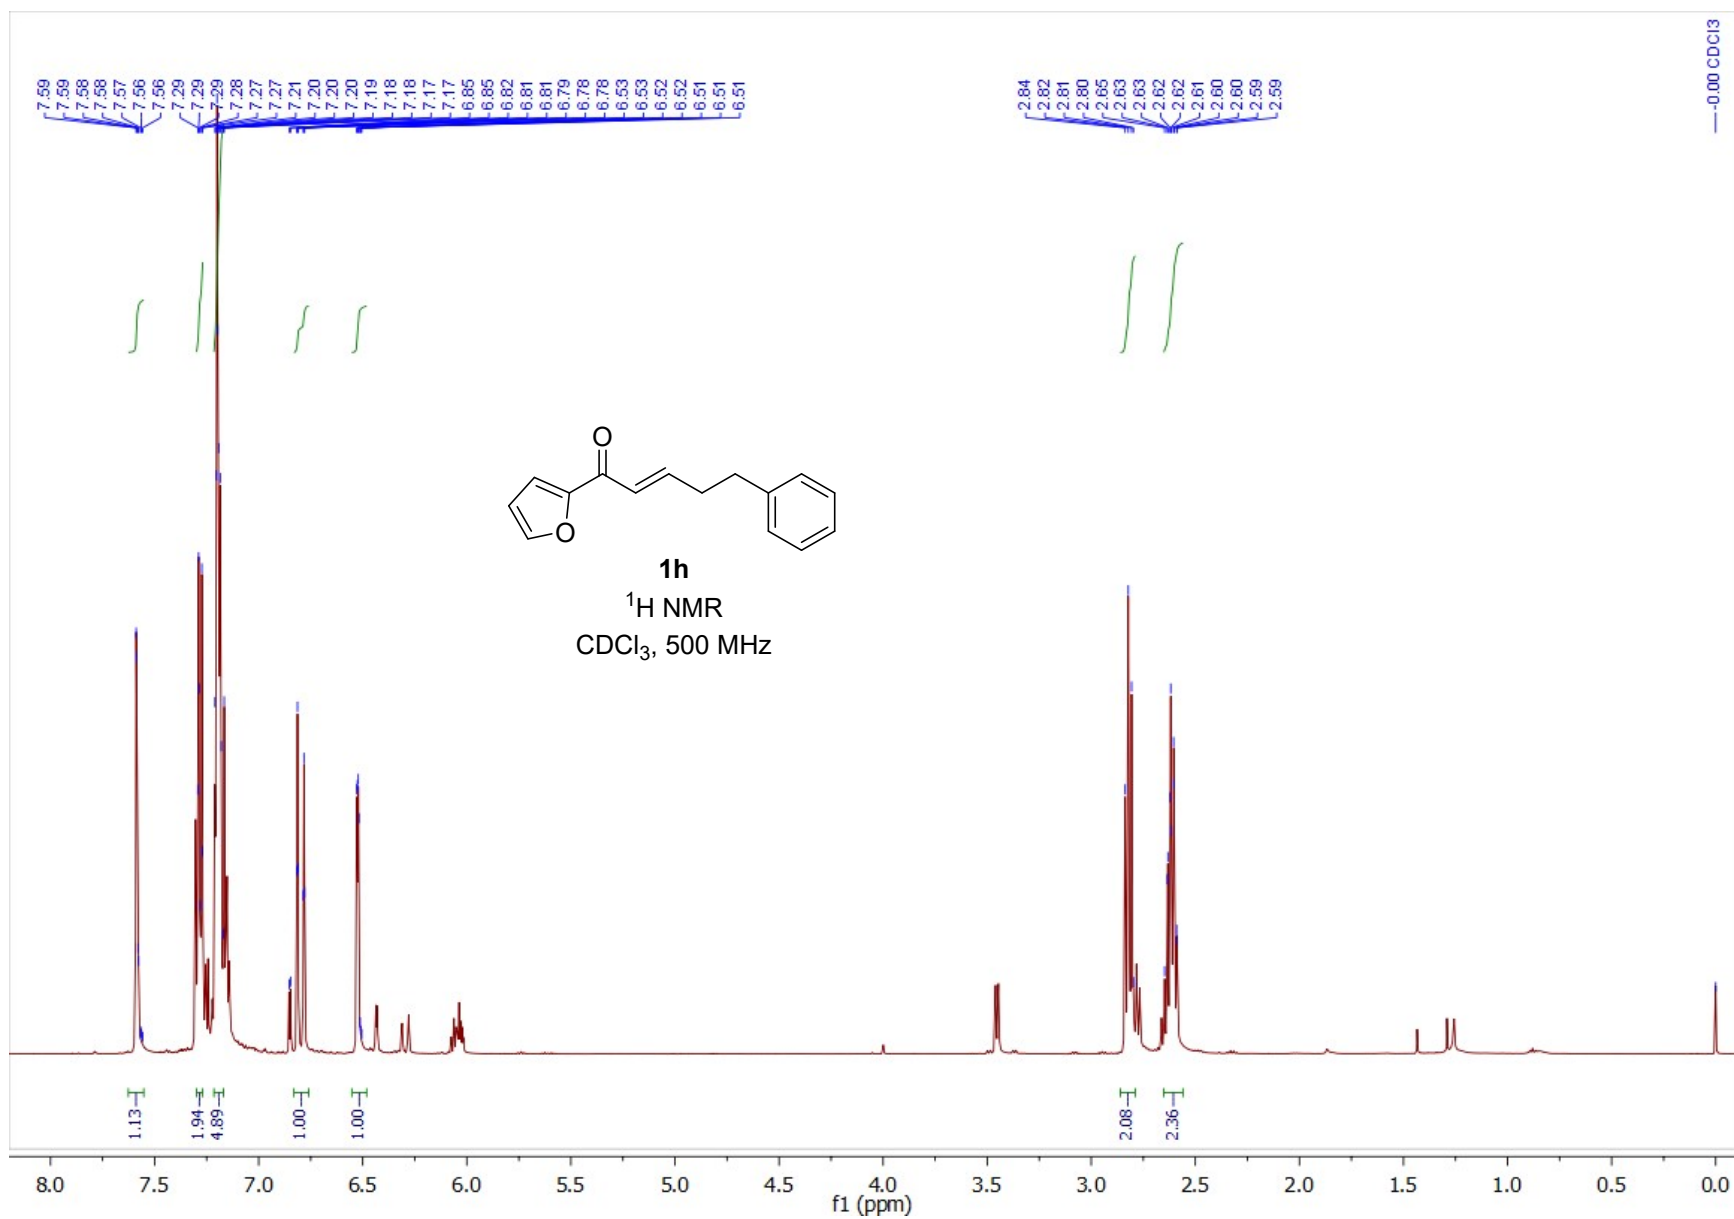

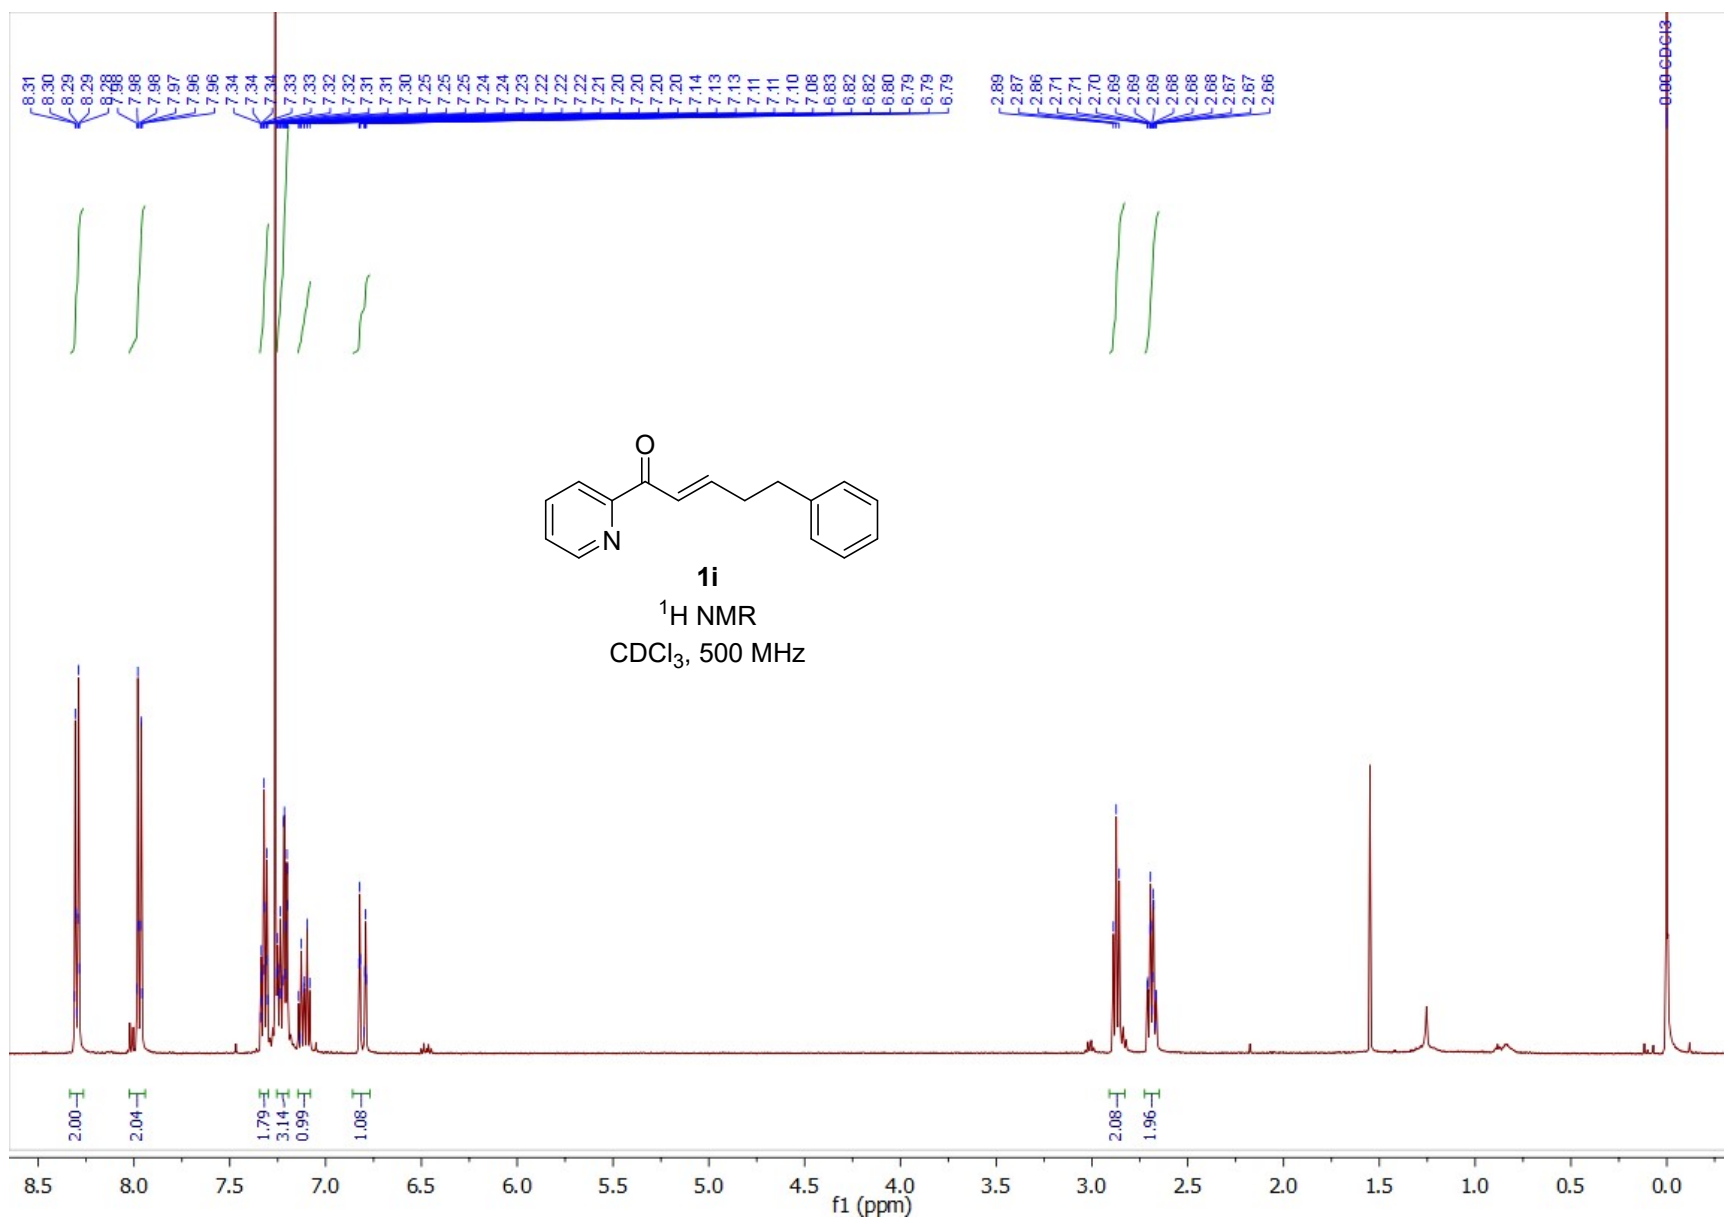

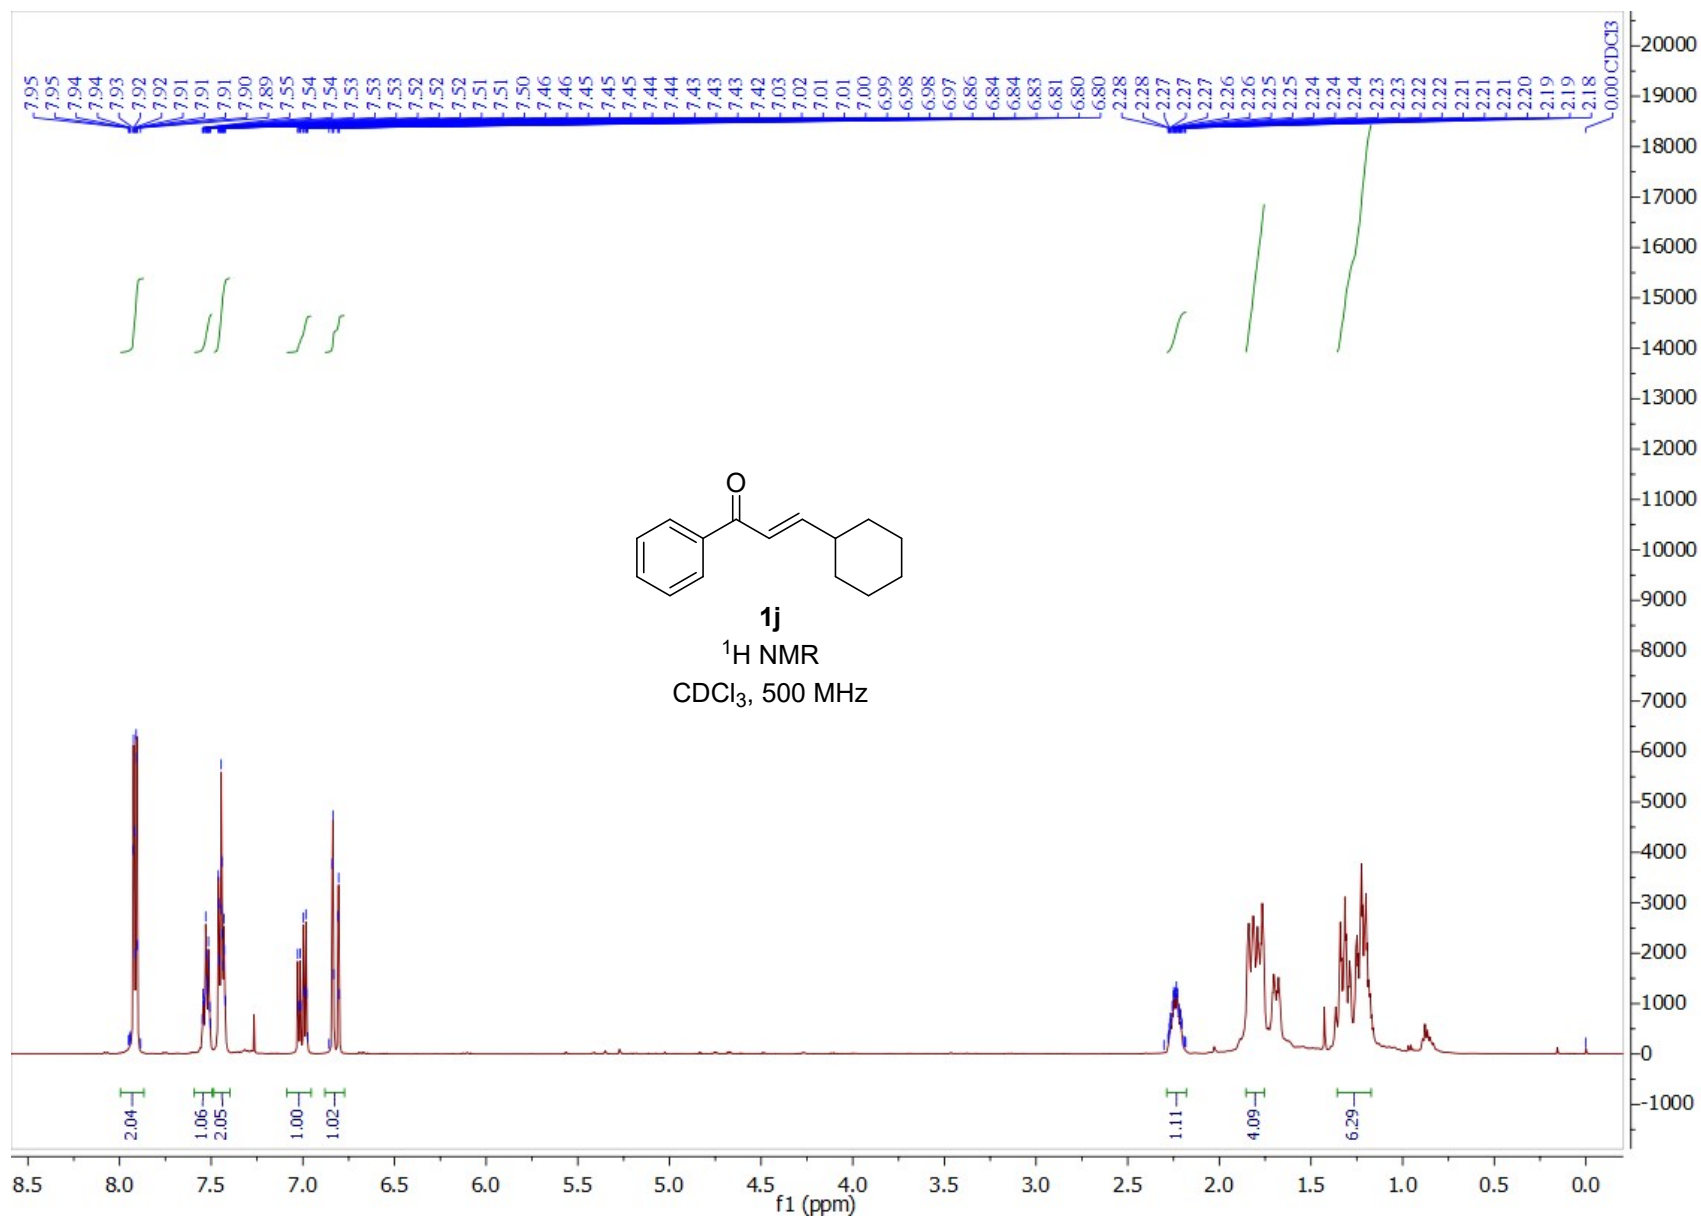

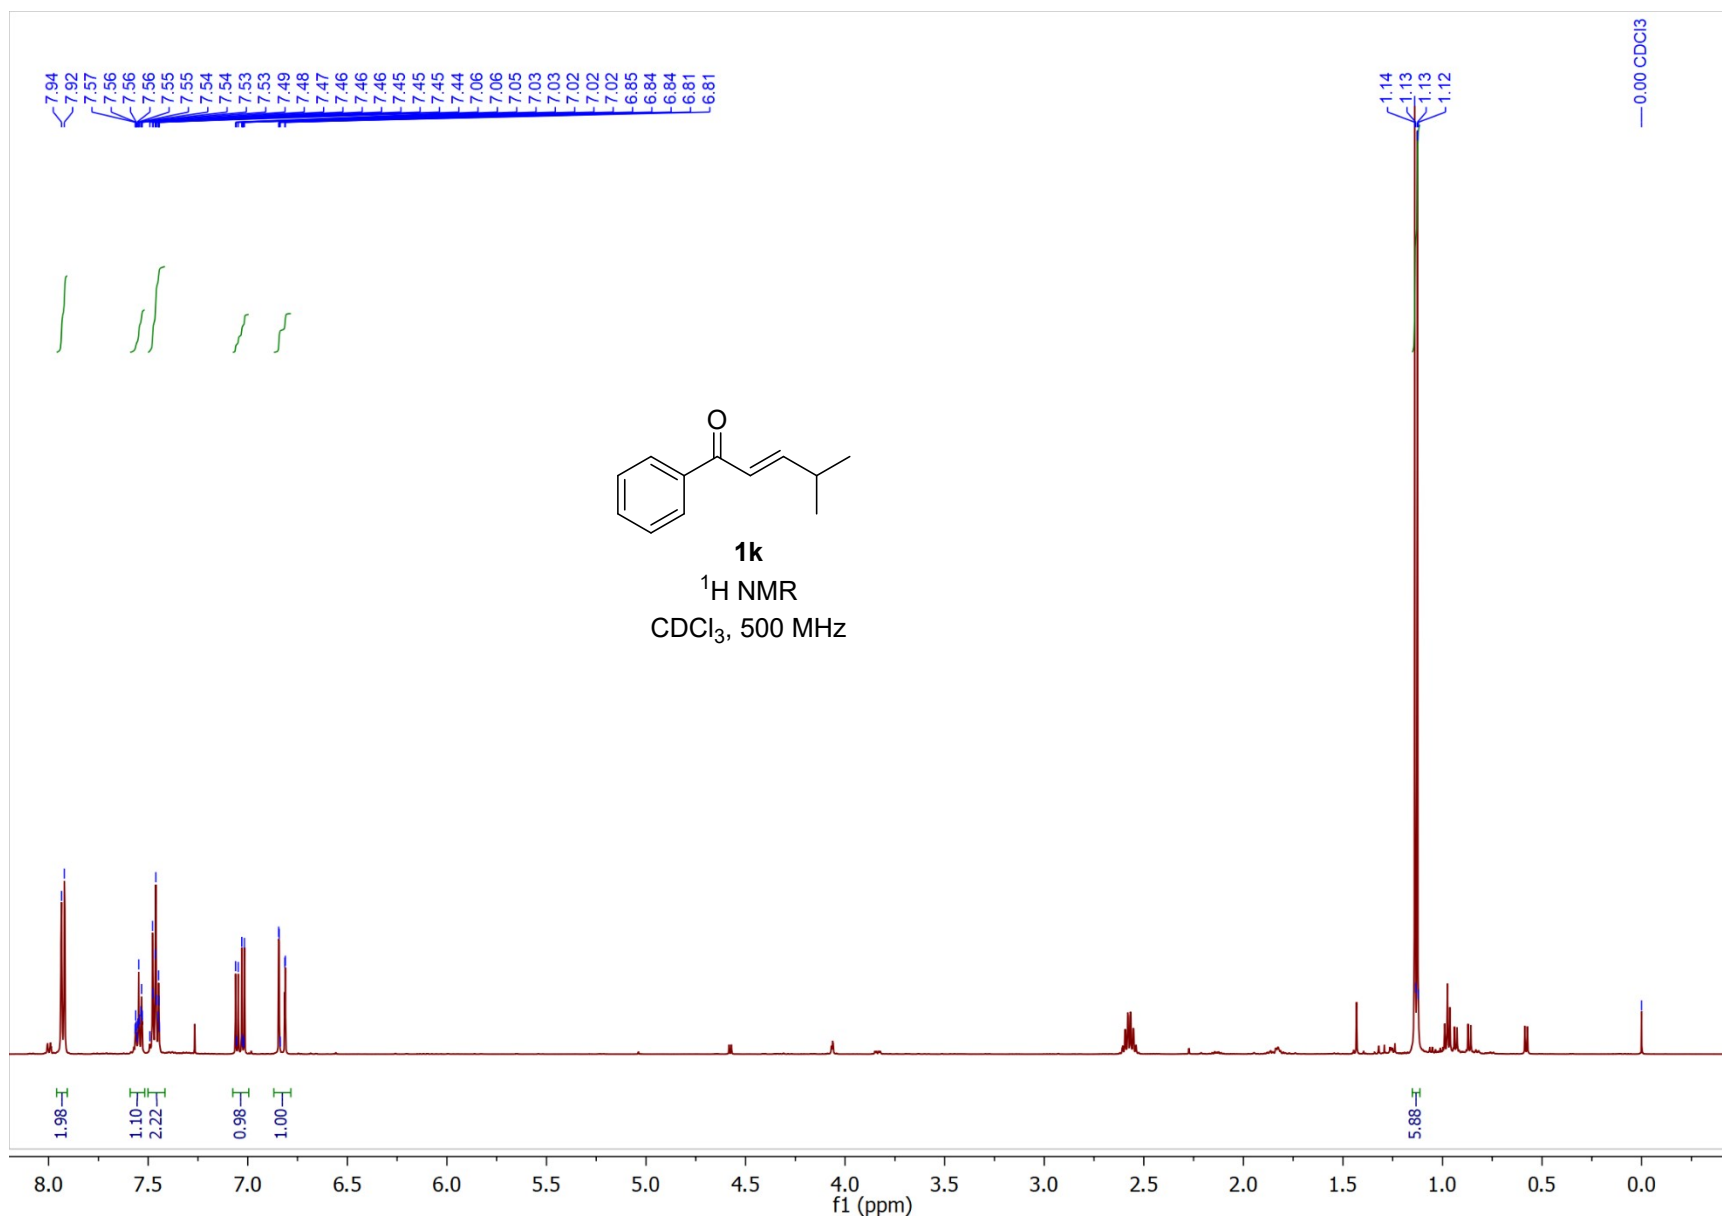

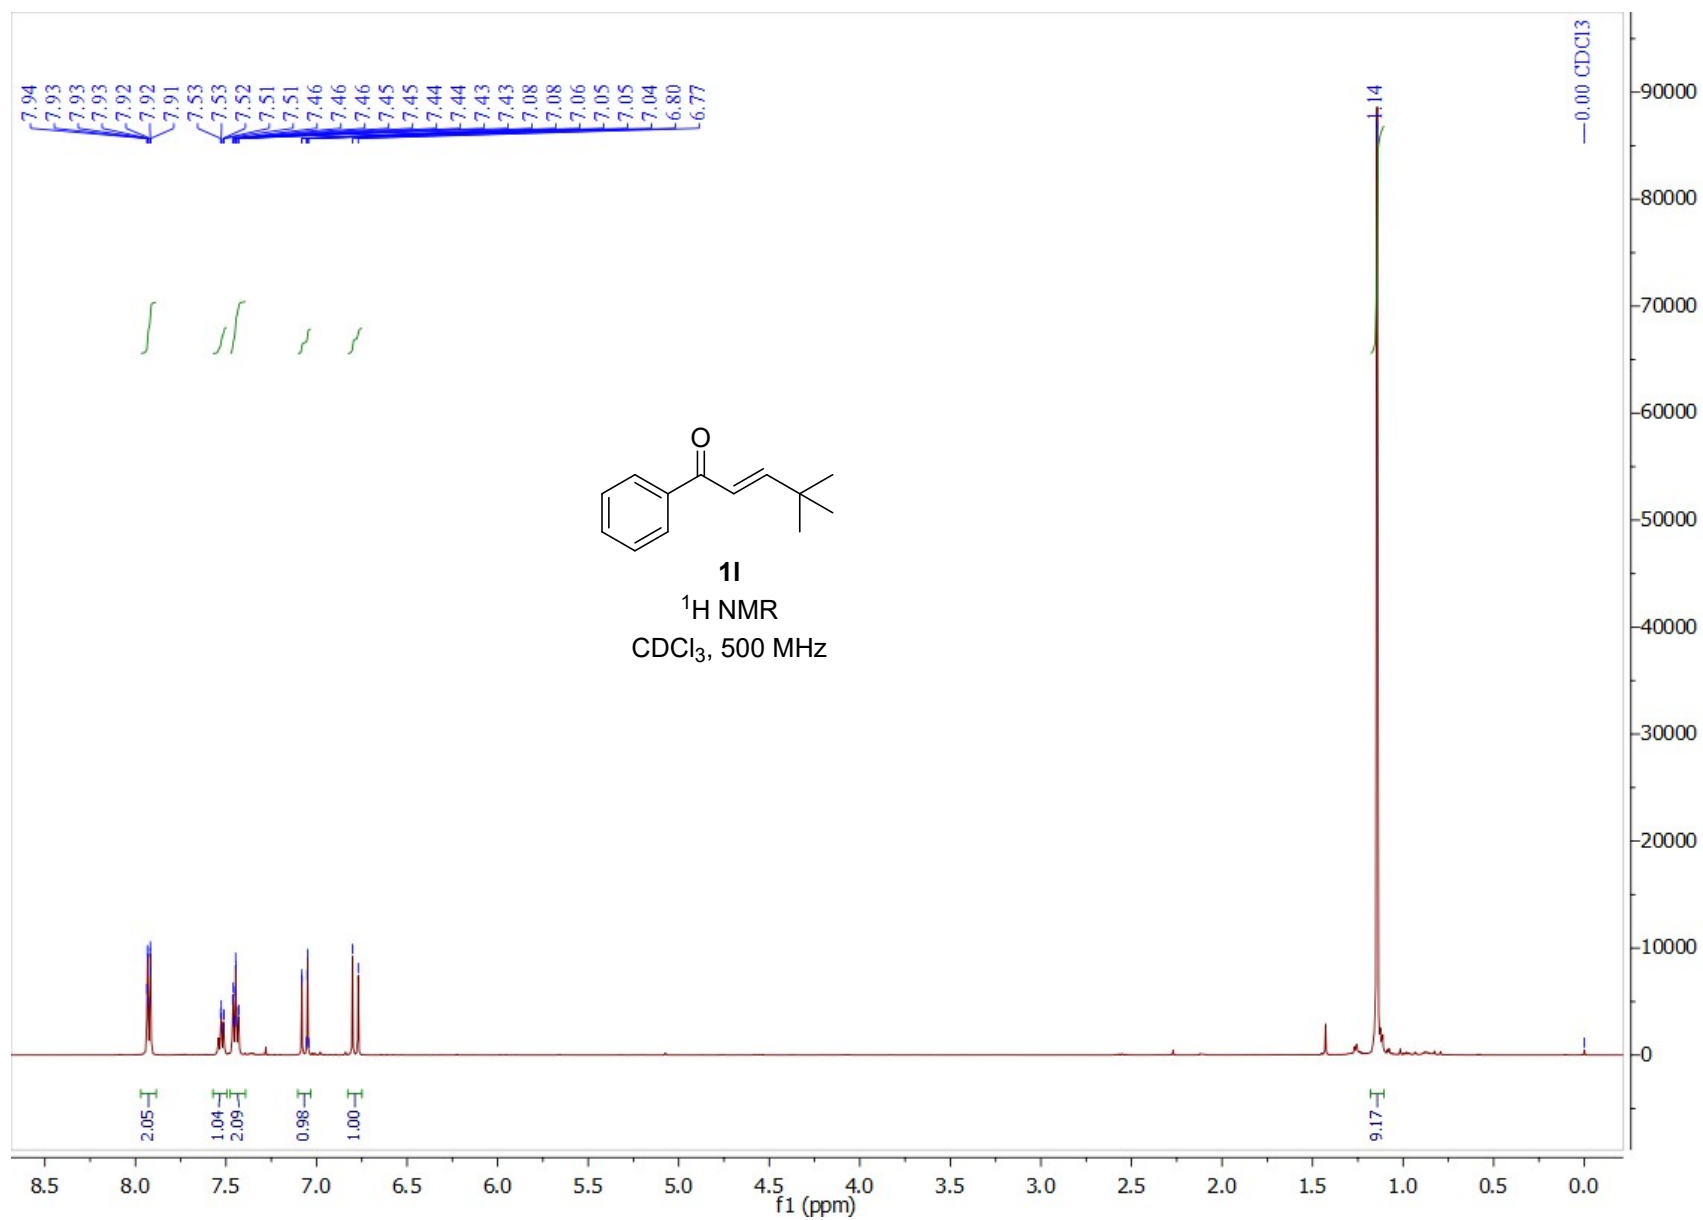

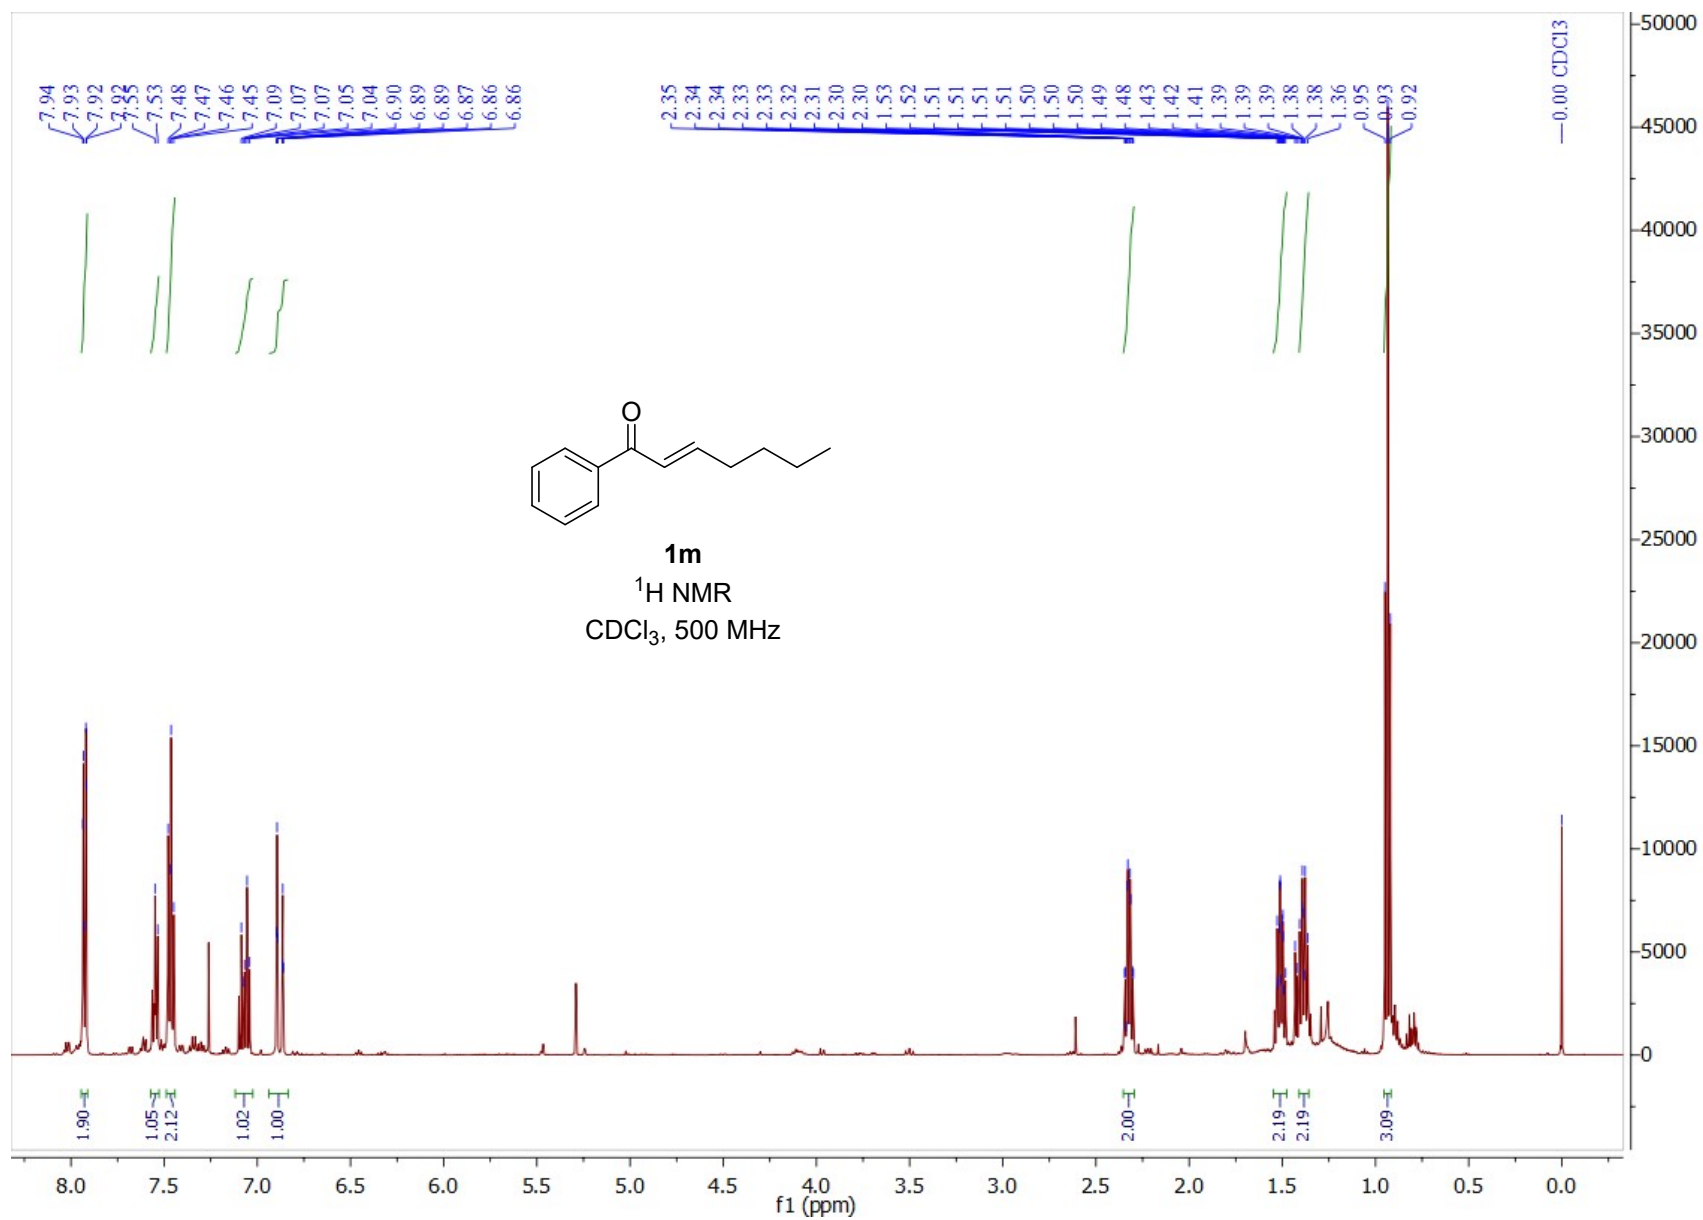

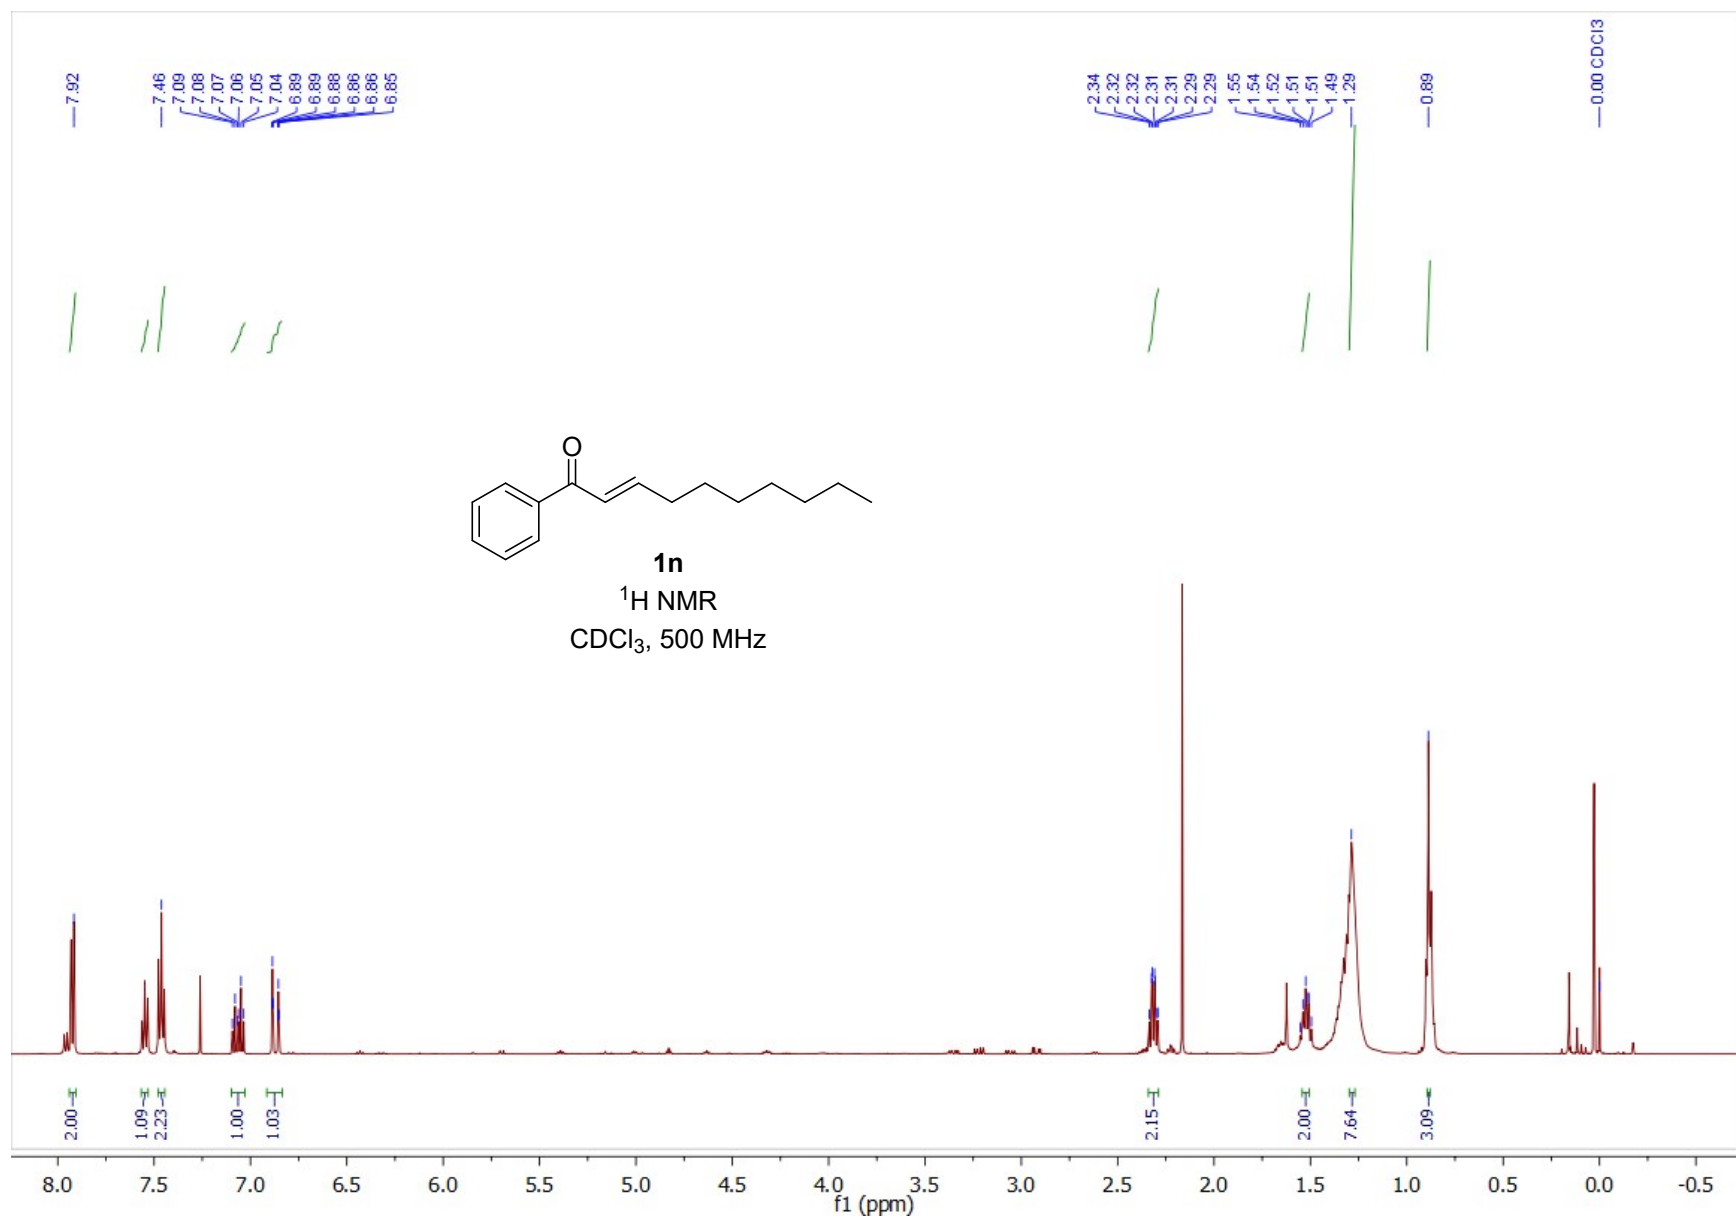



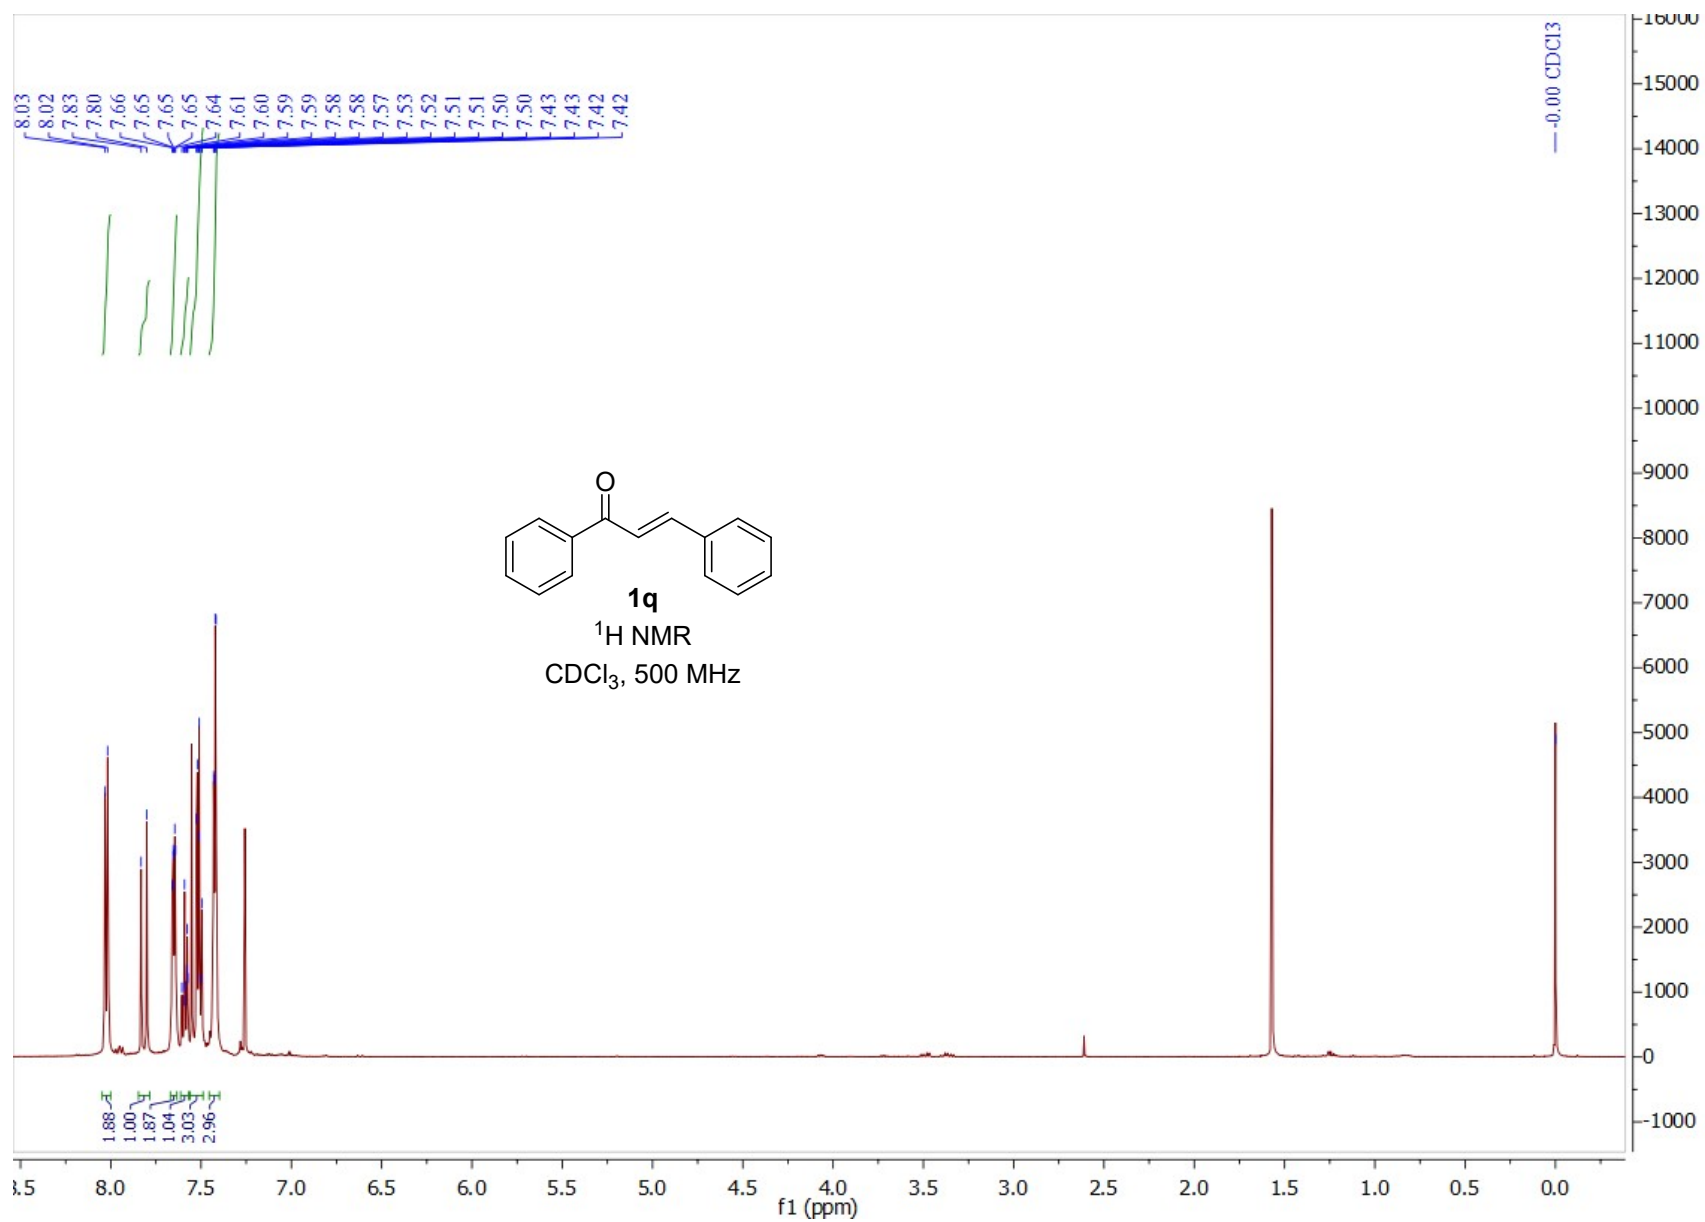

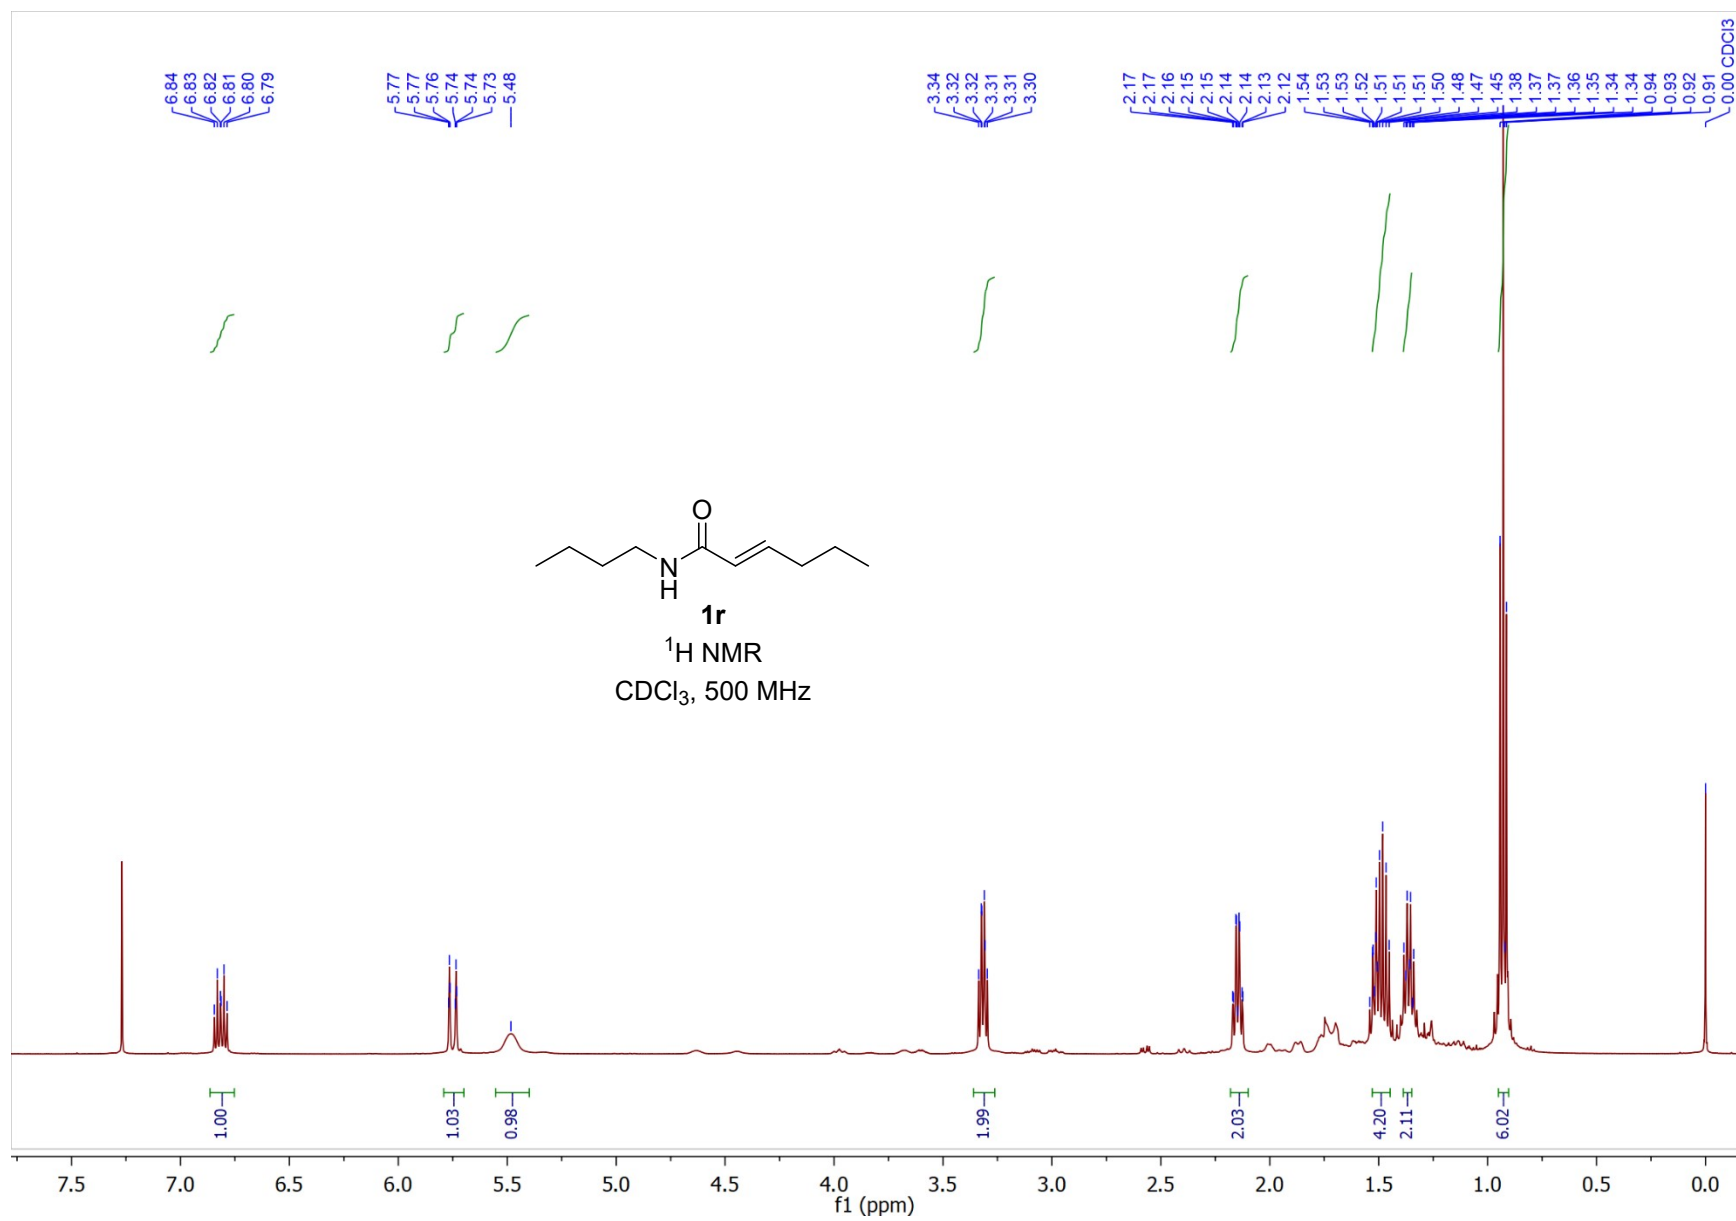

10.2  $^1\text{H}$ ,  $^{13}\text{C}$ , and  $^{19}\text{F}$  NMR for isothiocyanation products and derivatives

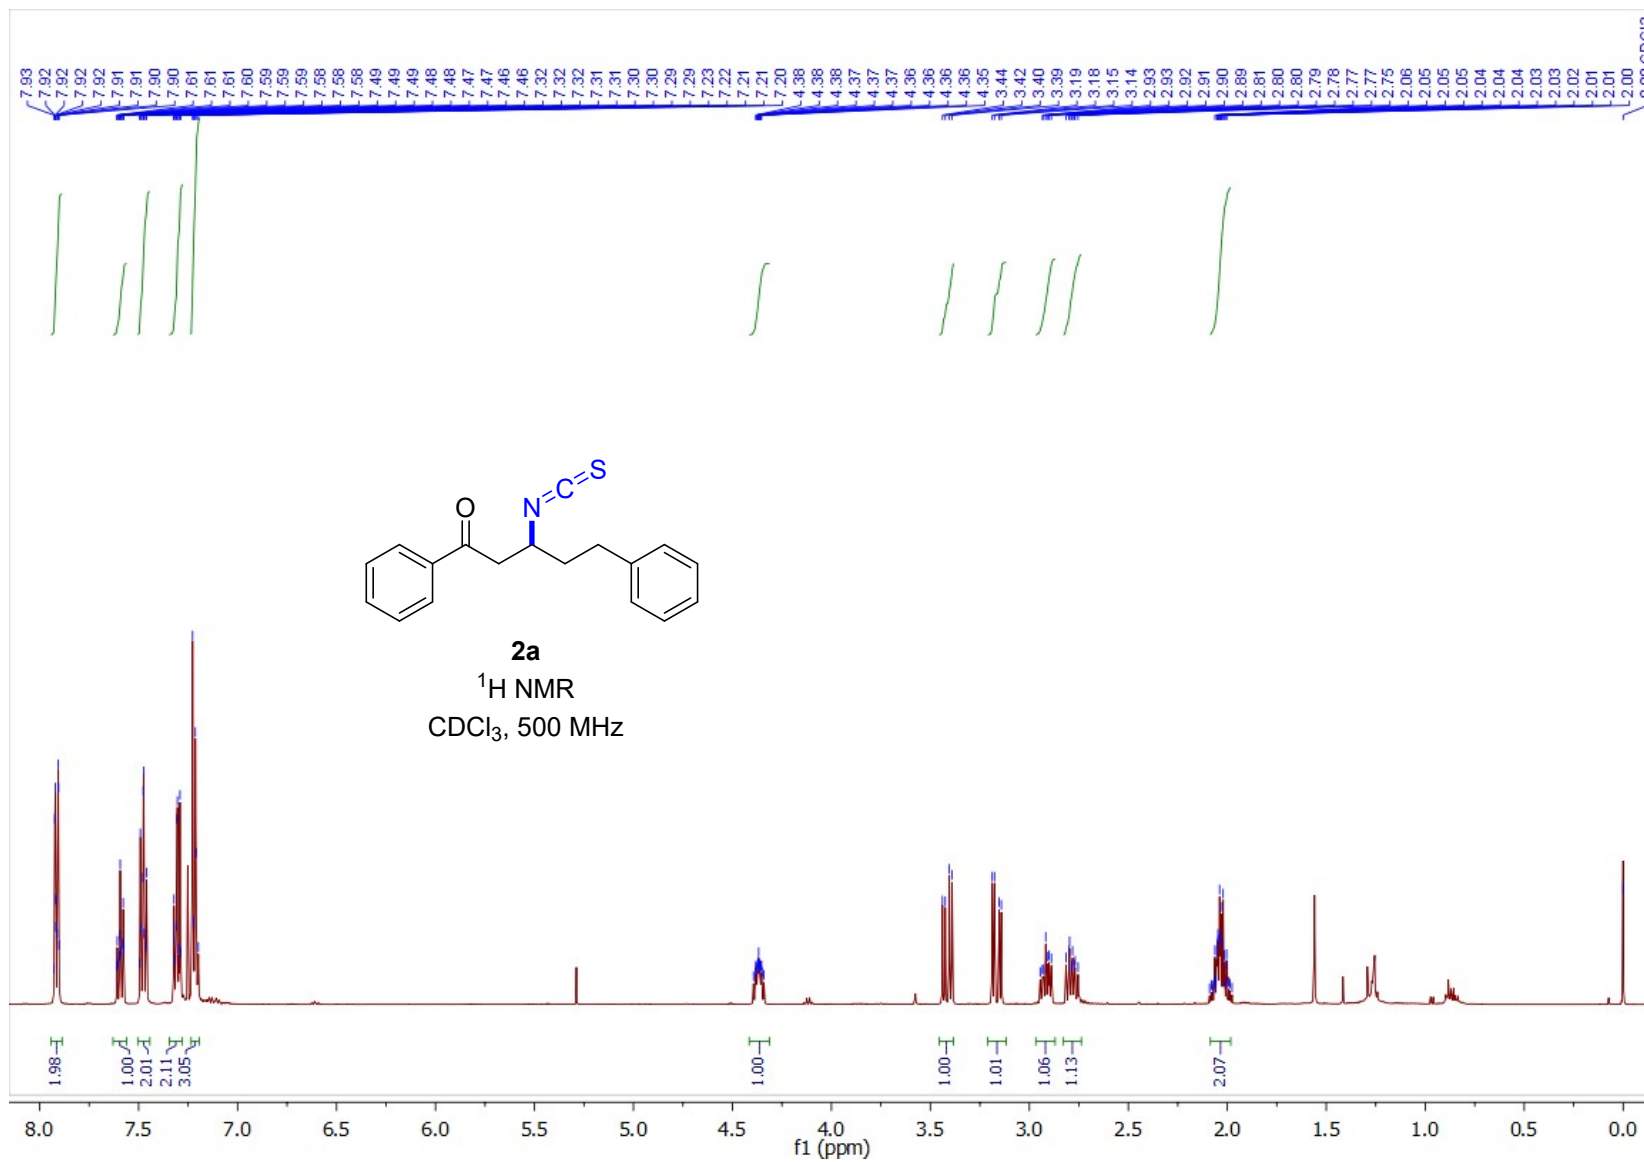

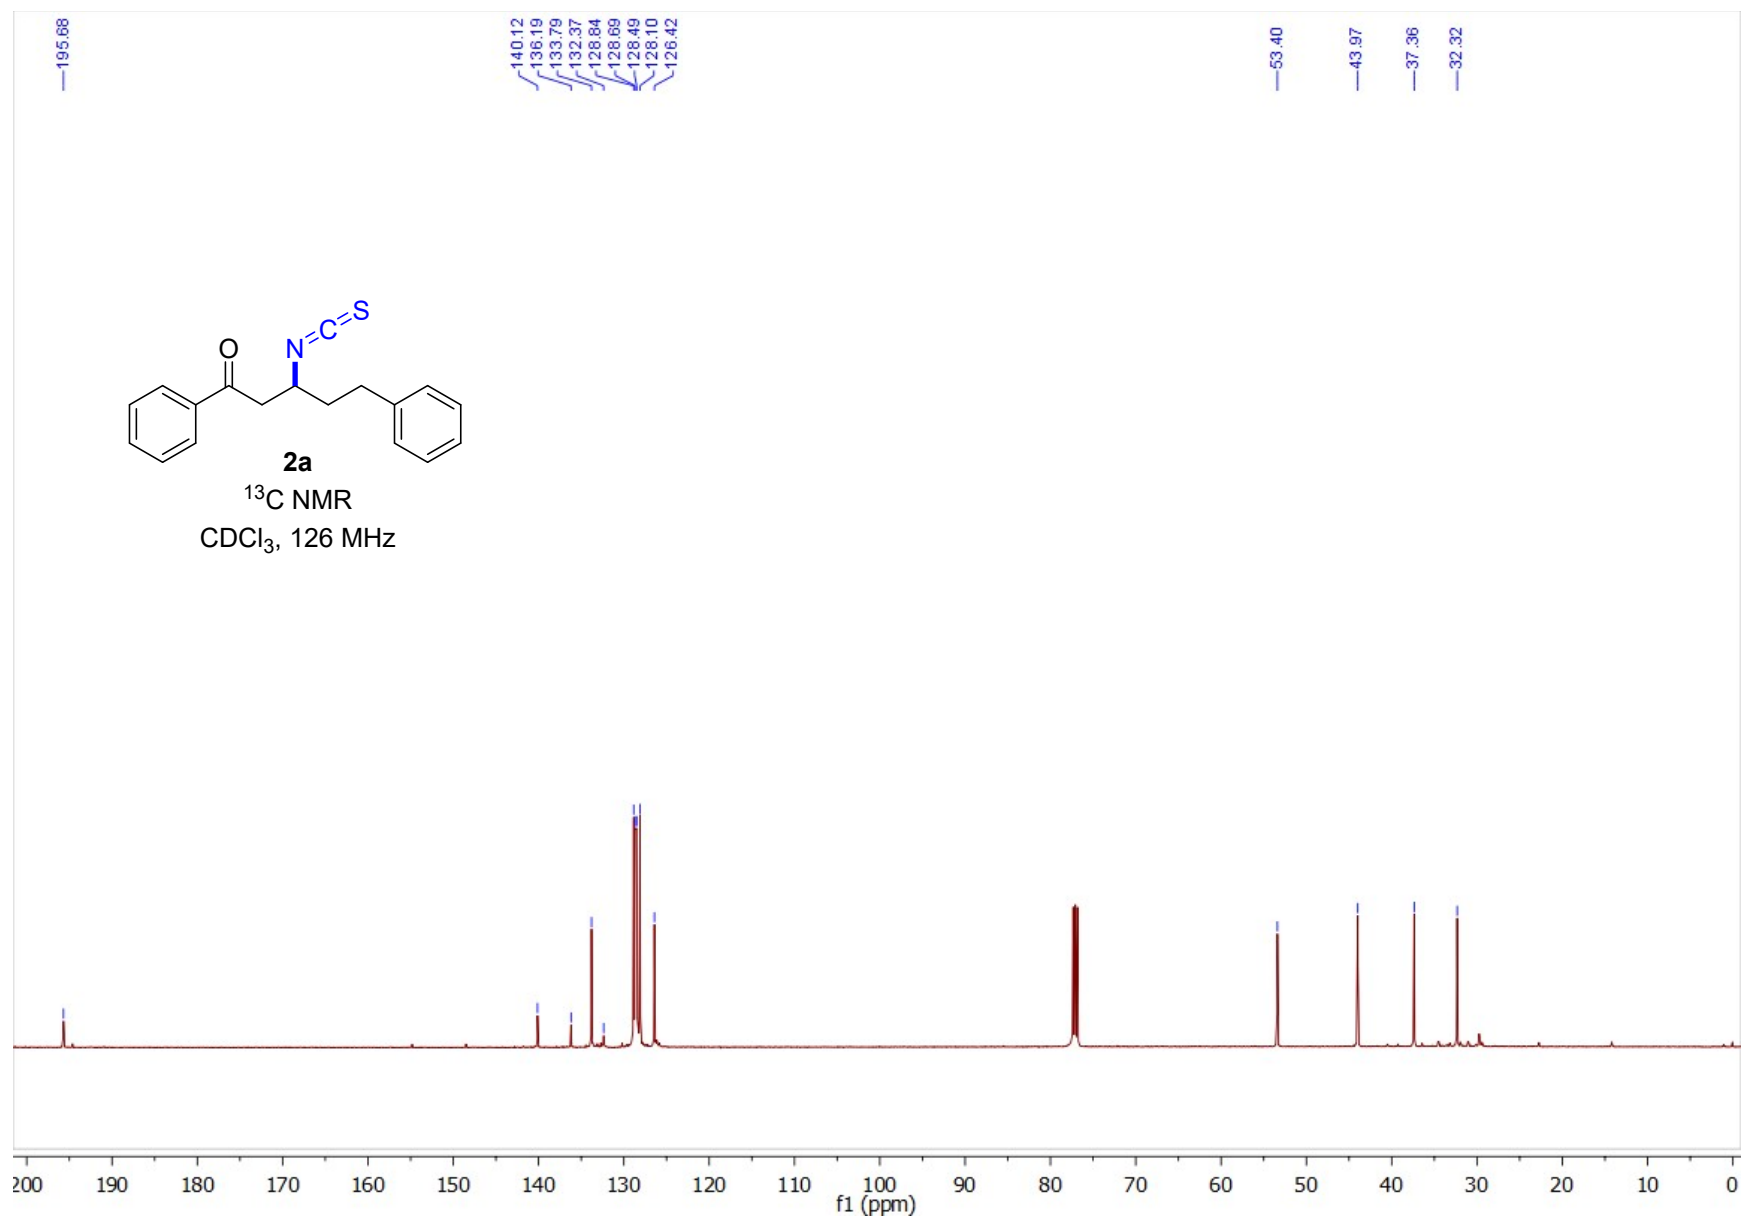

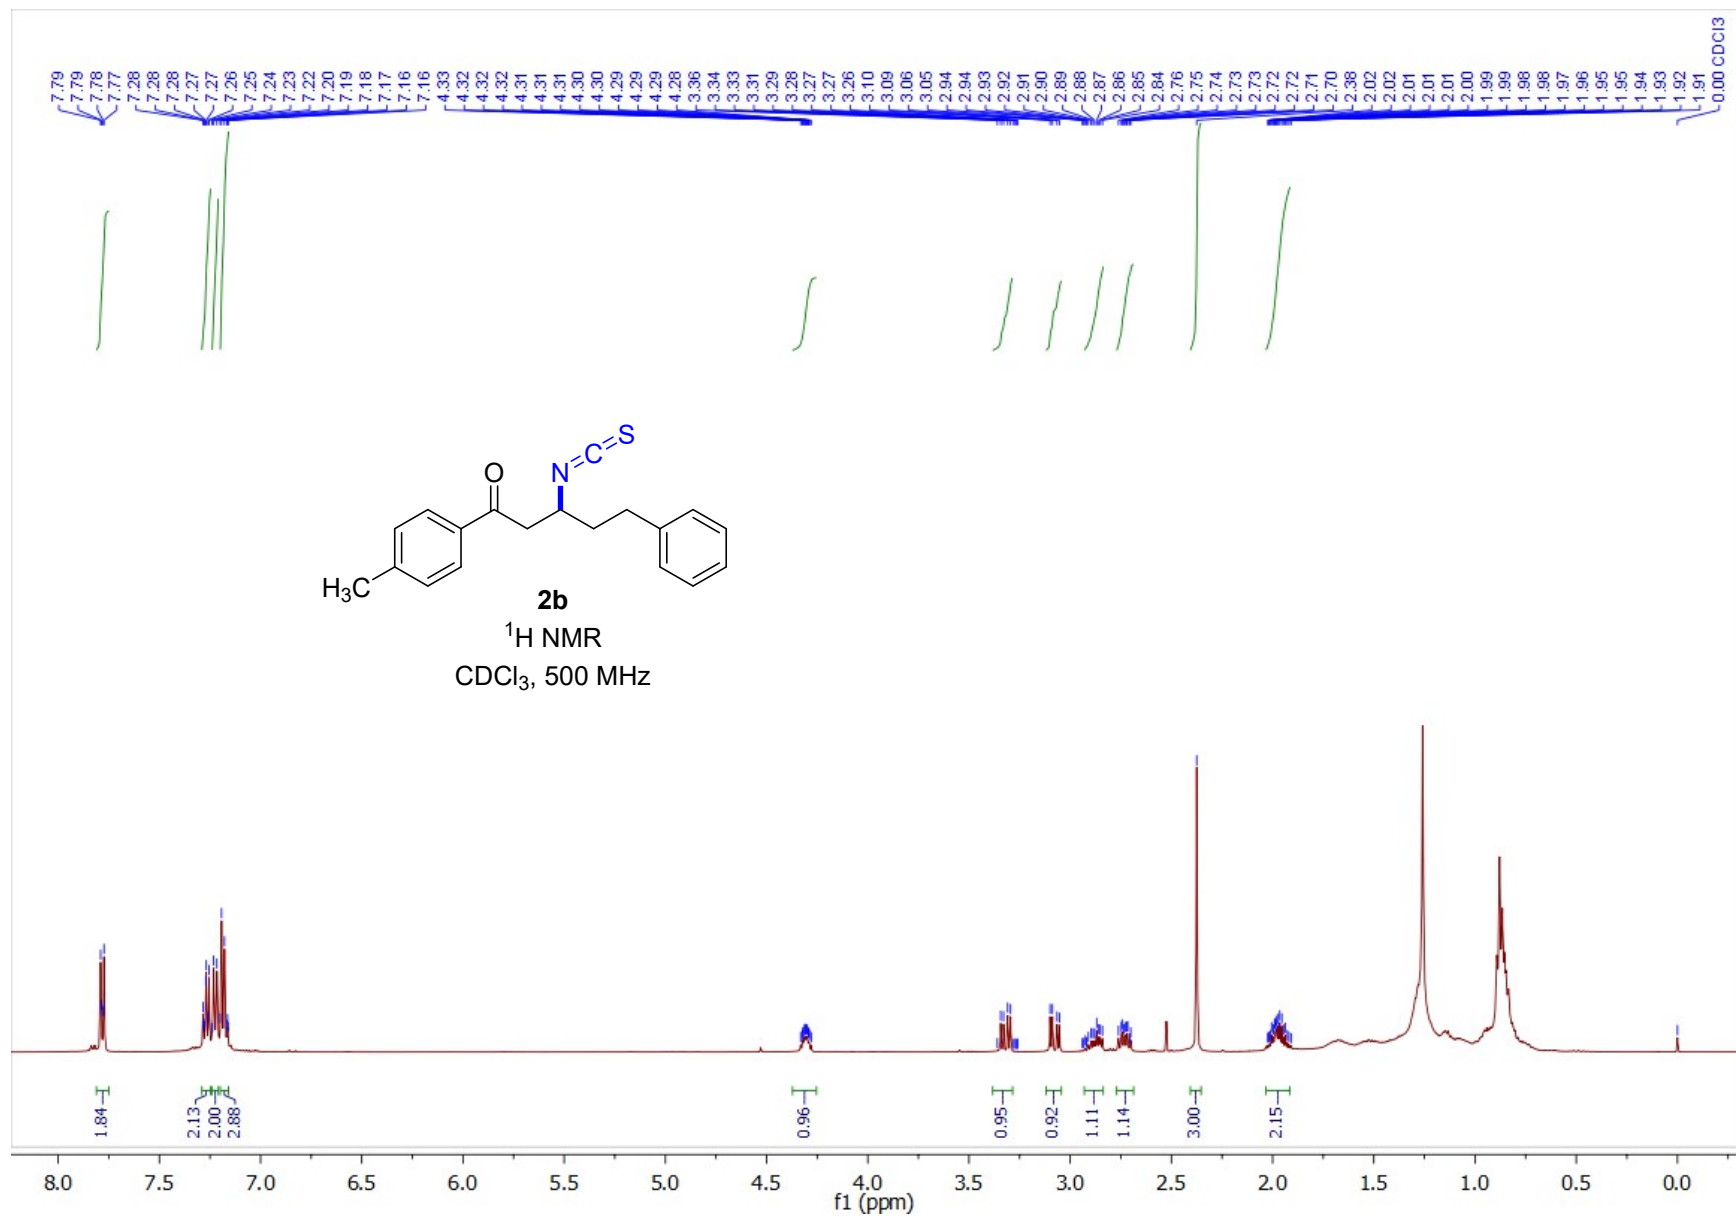

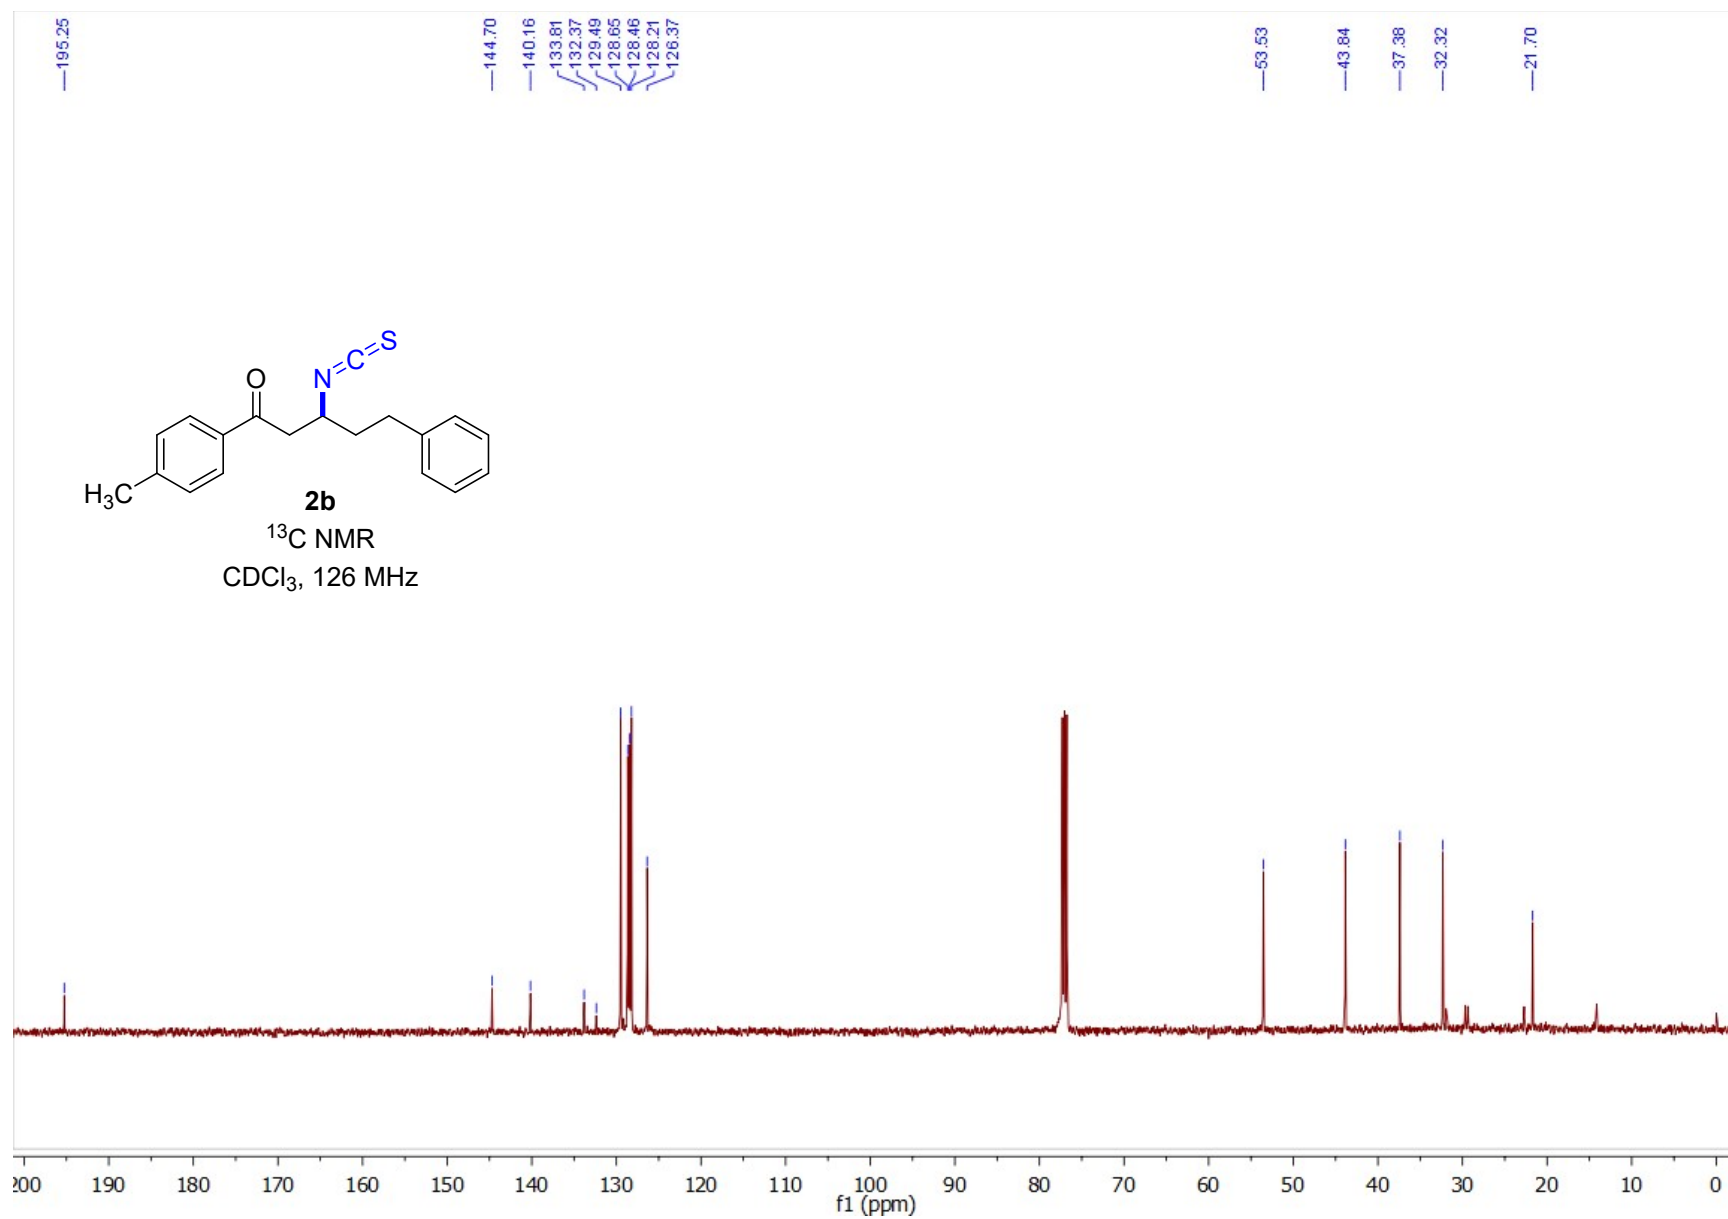

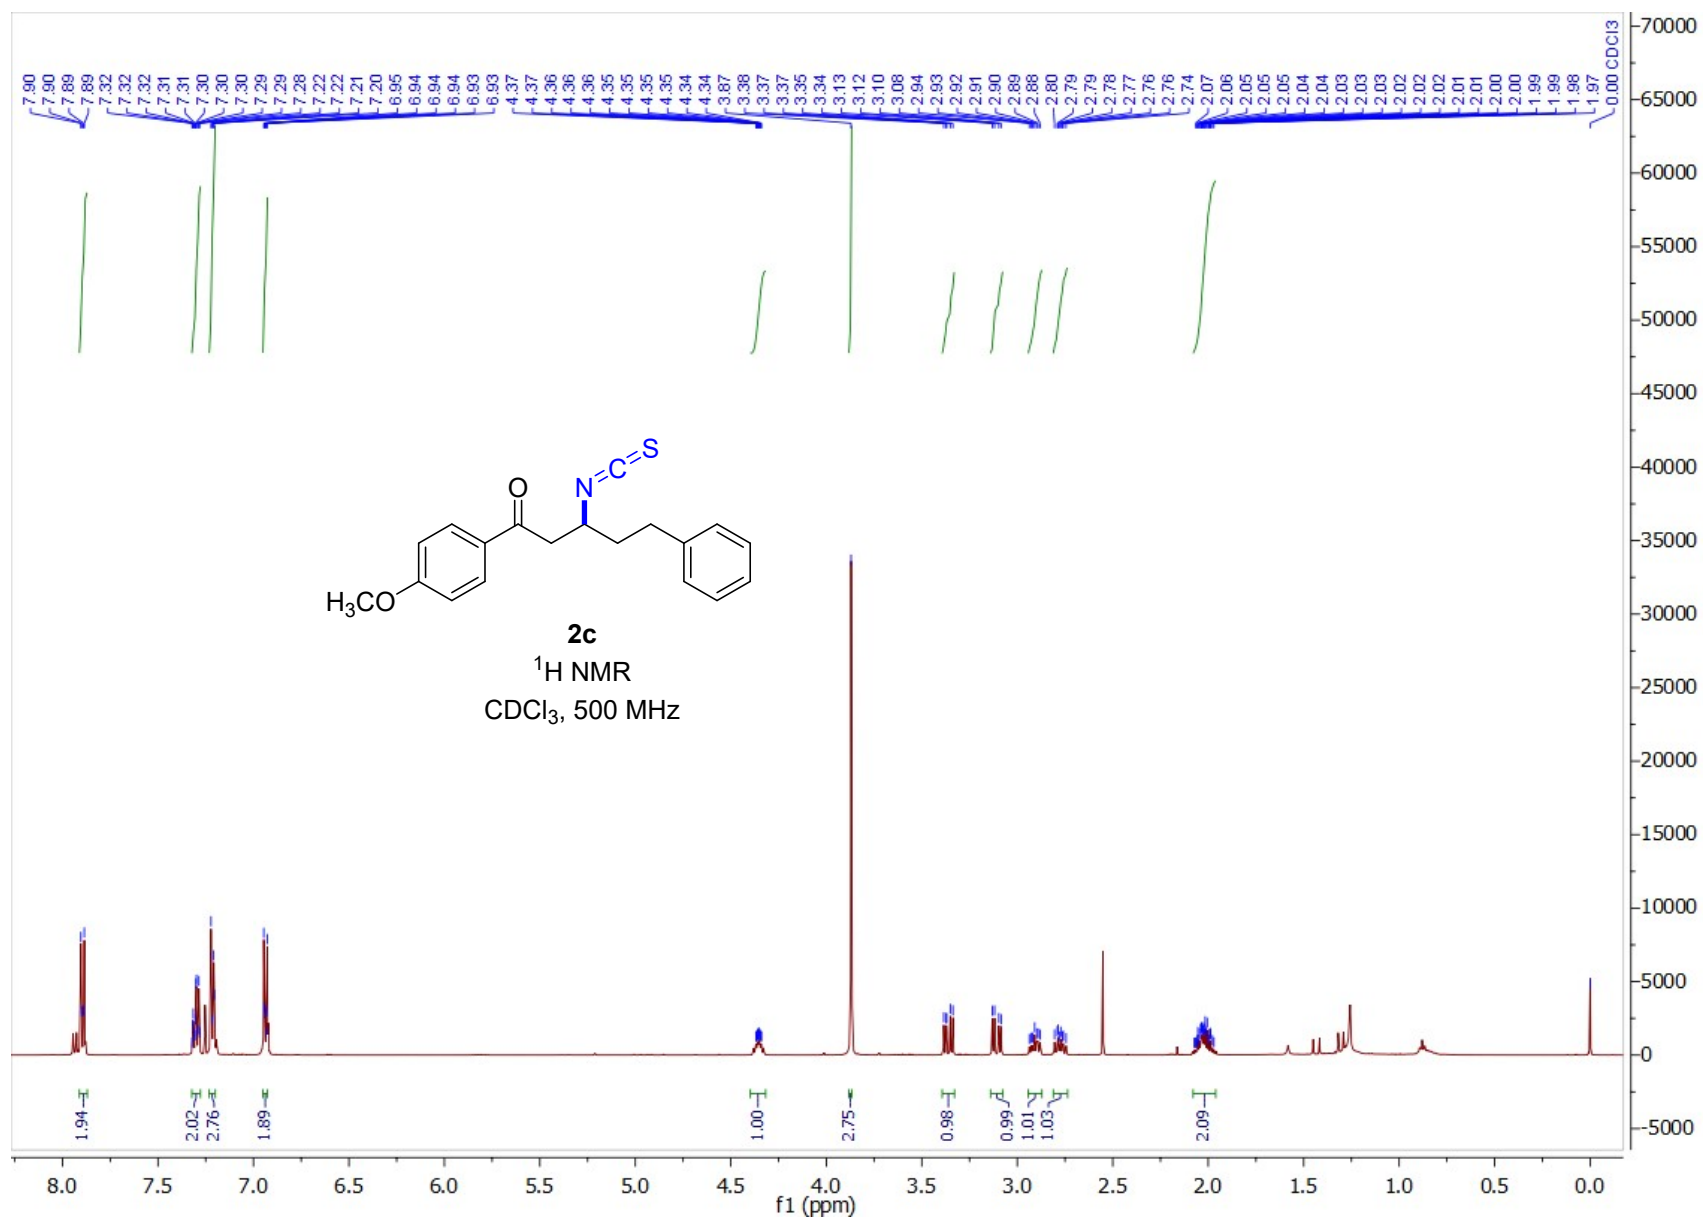

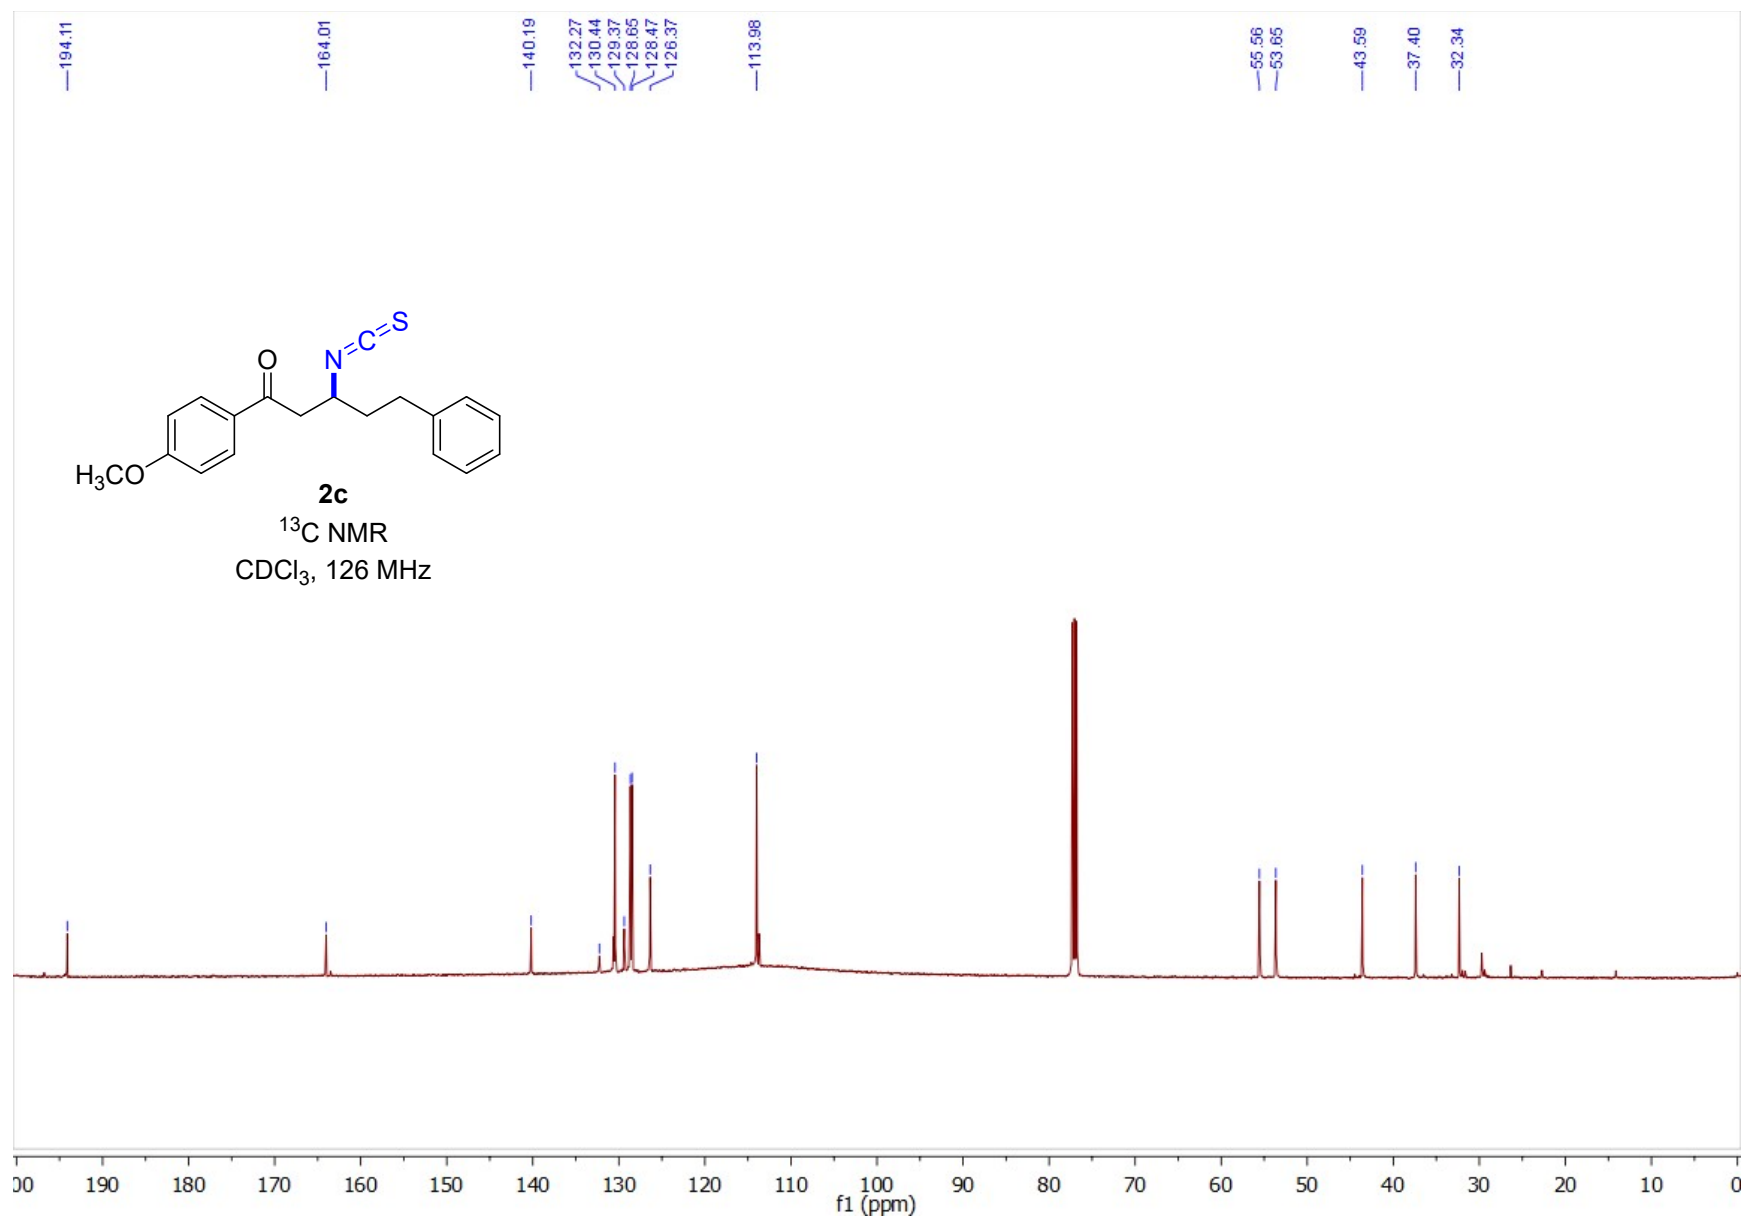



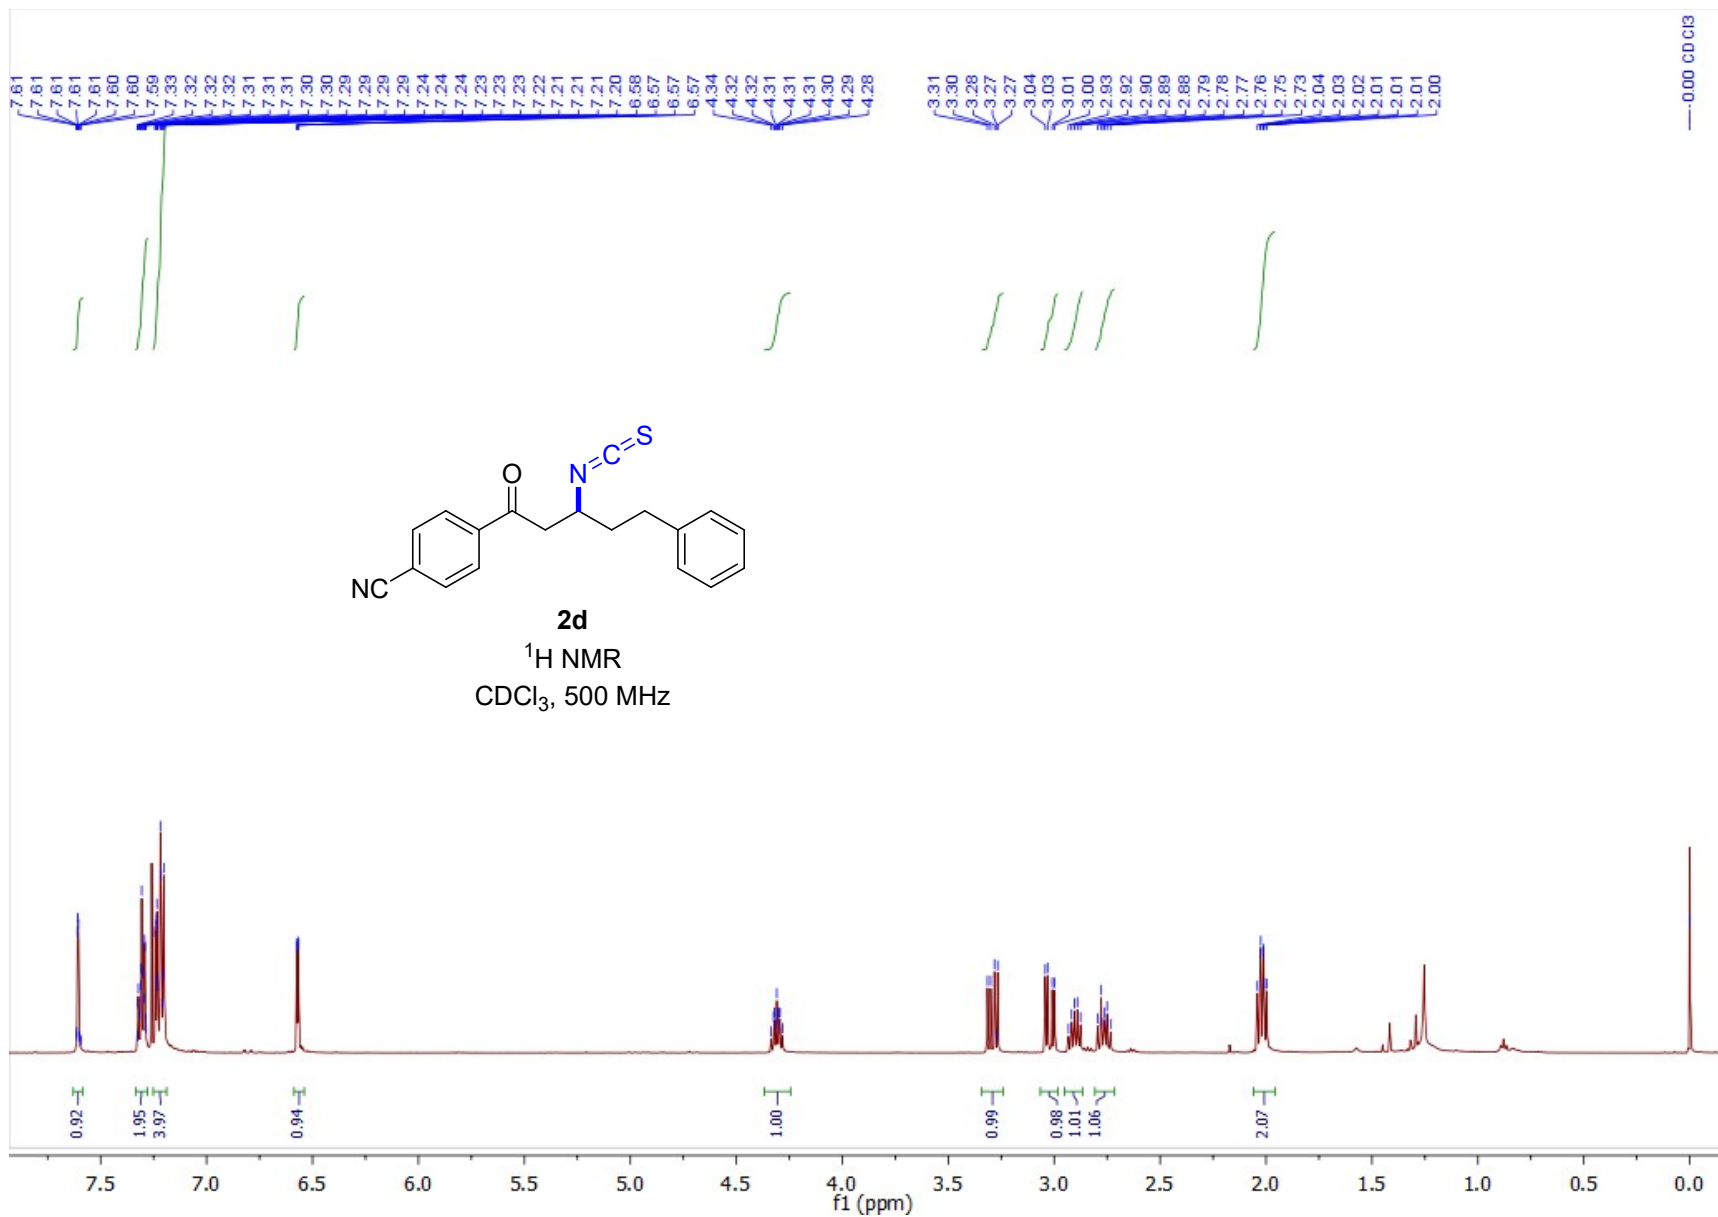

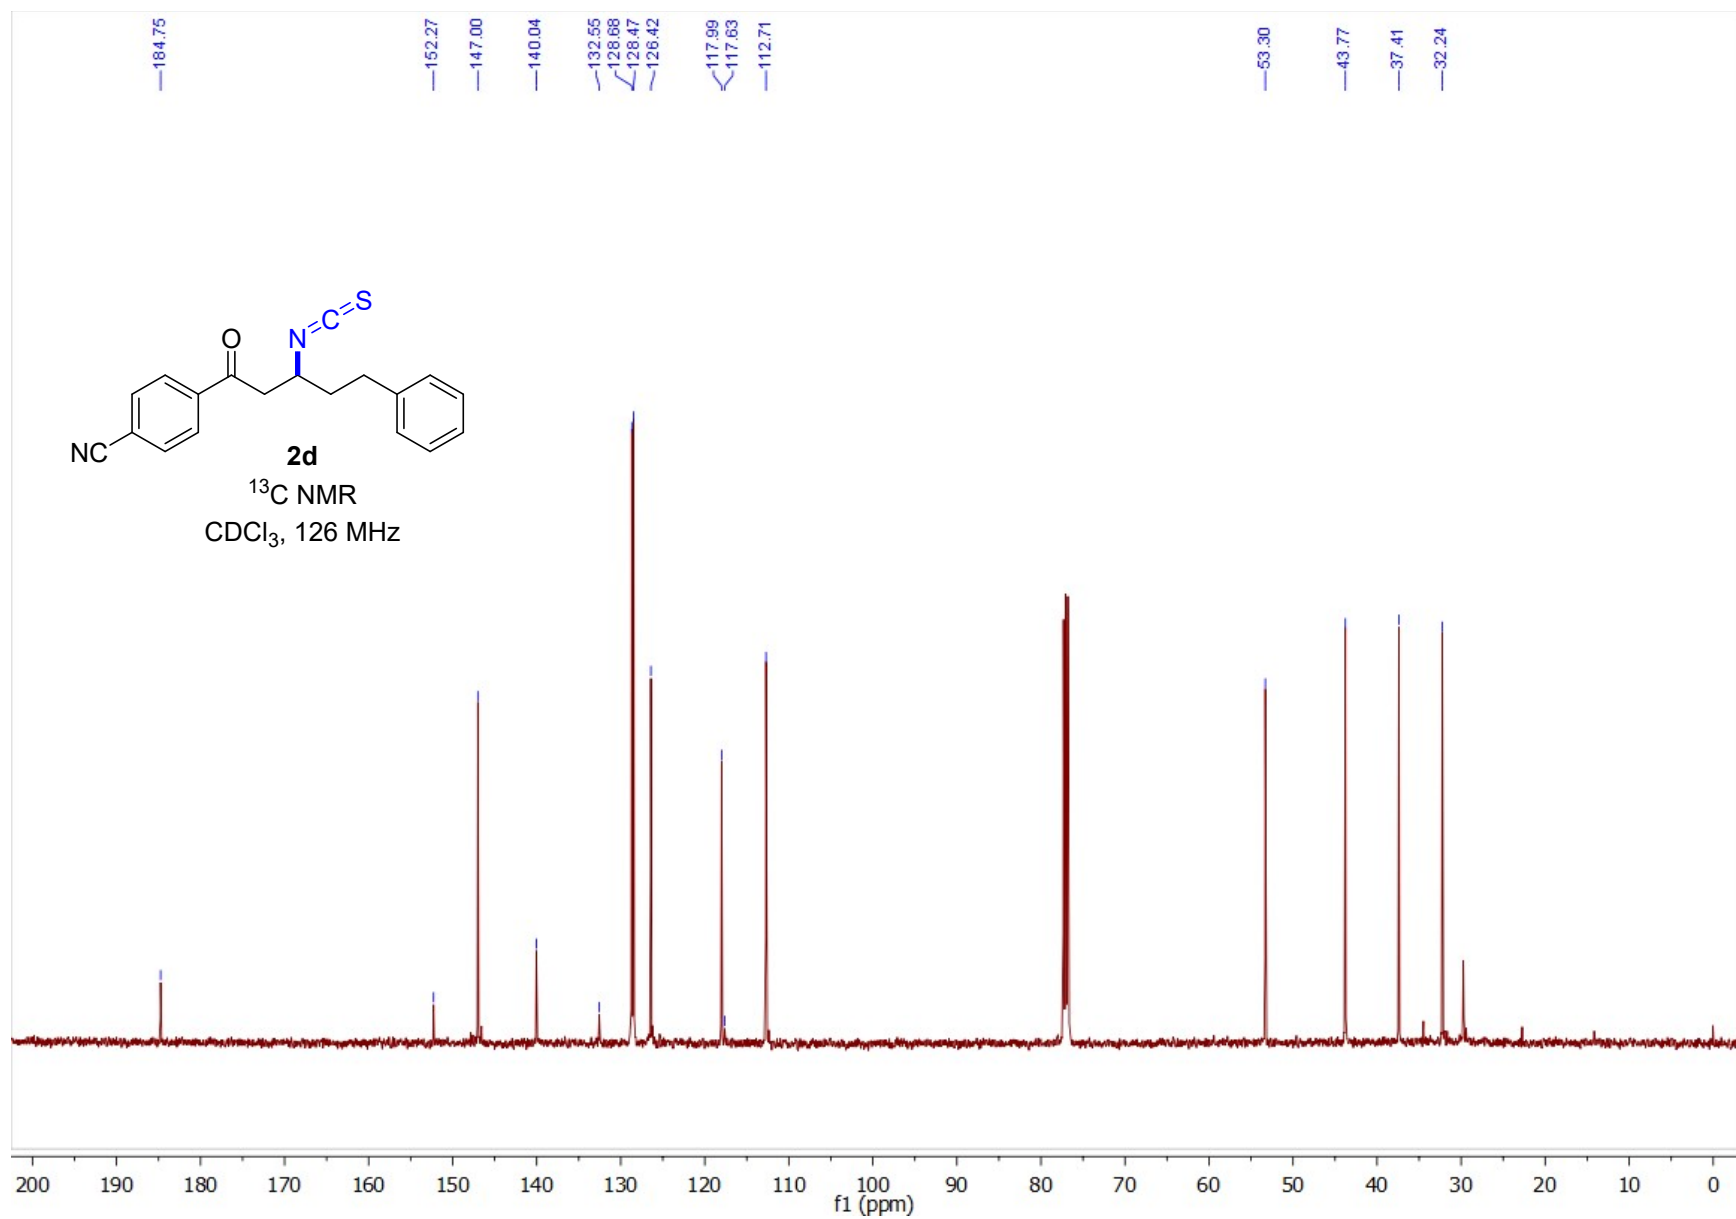

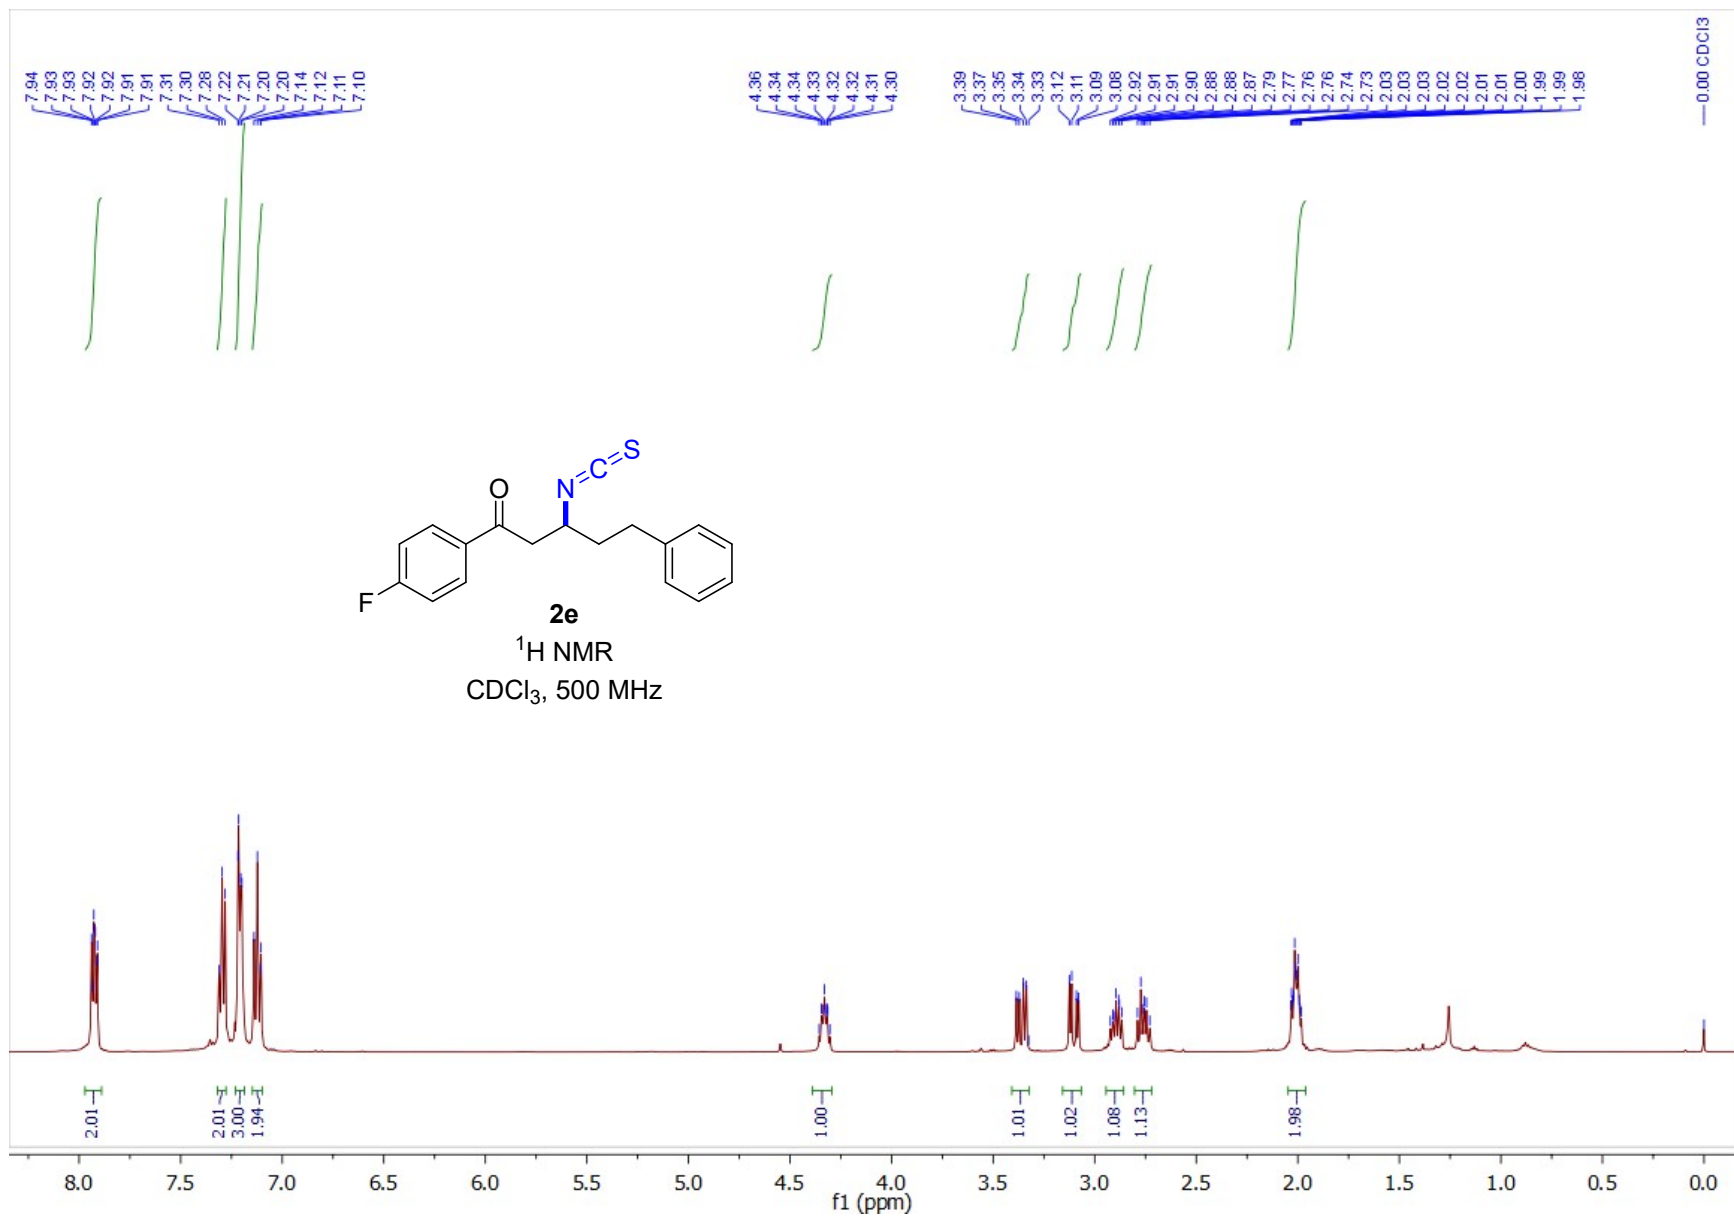

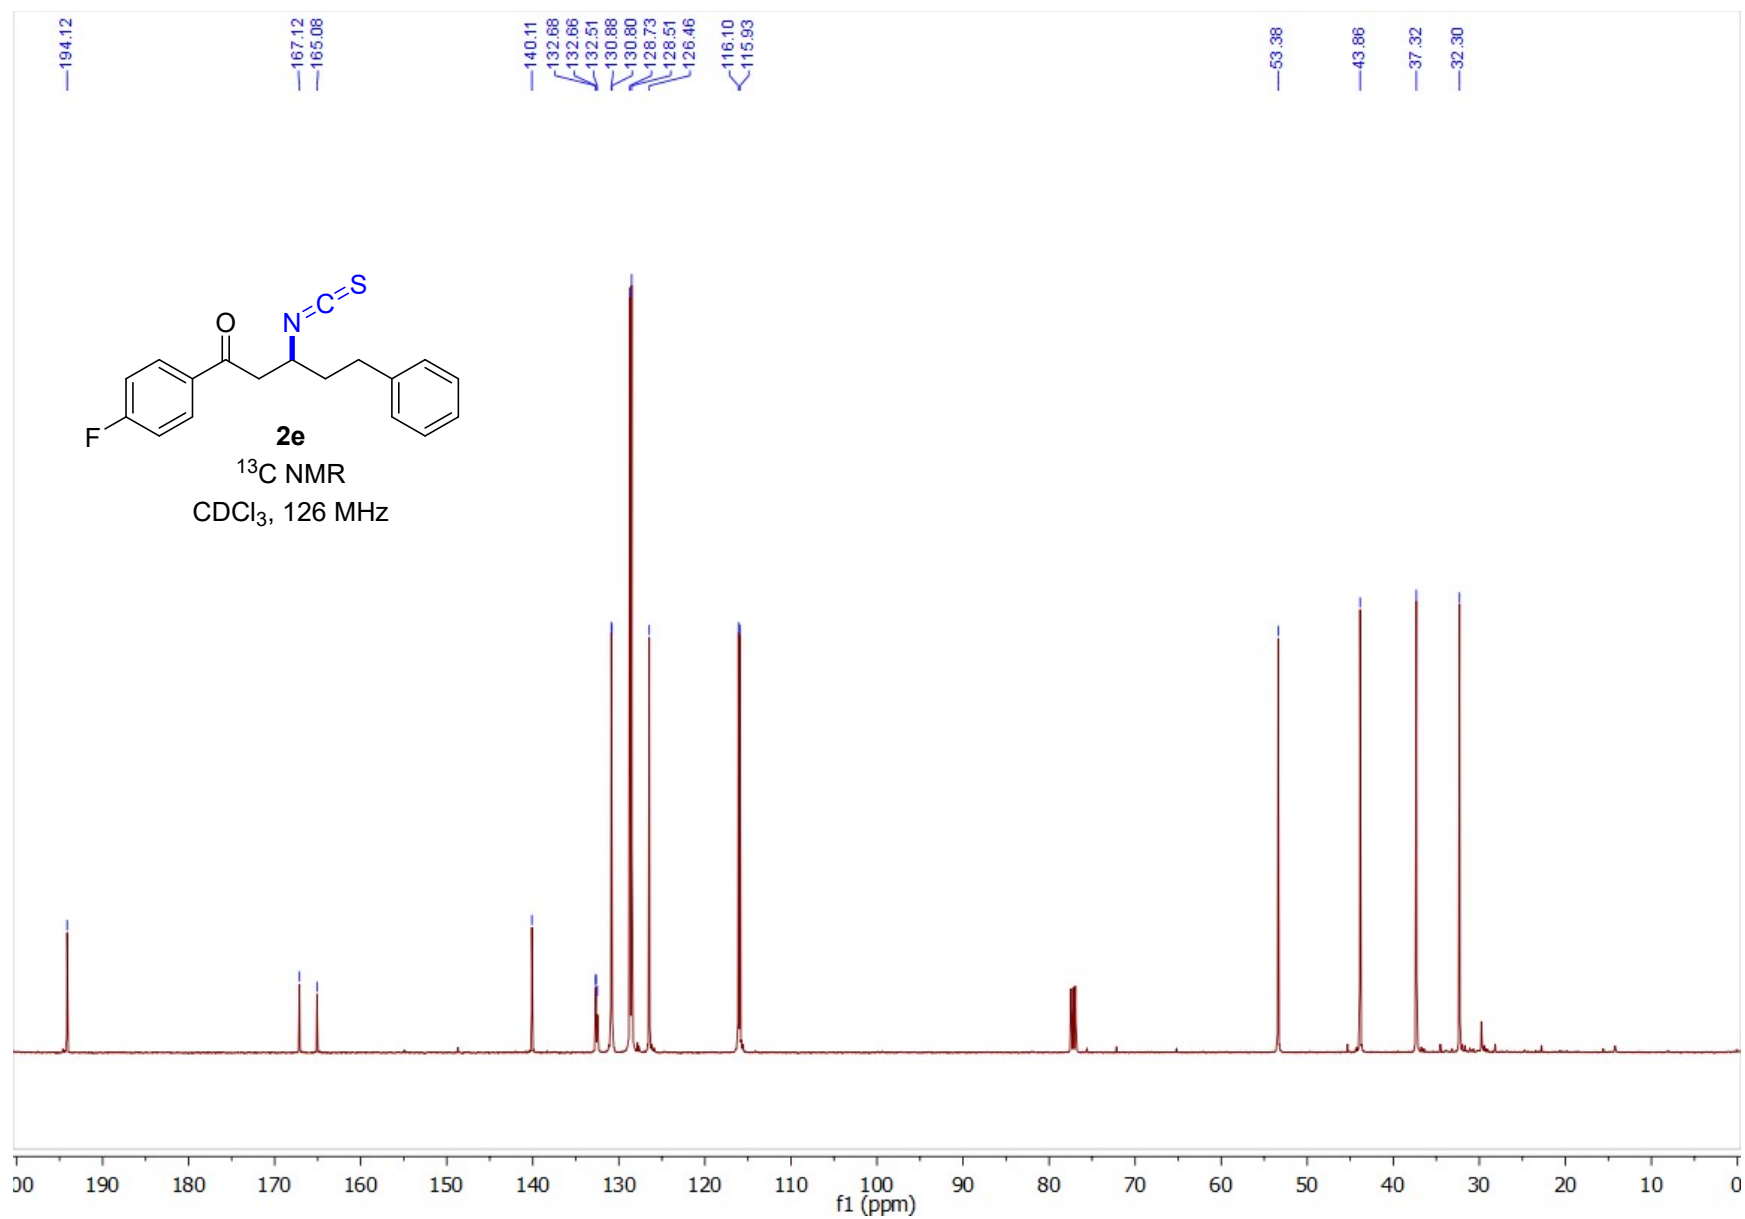

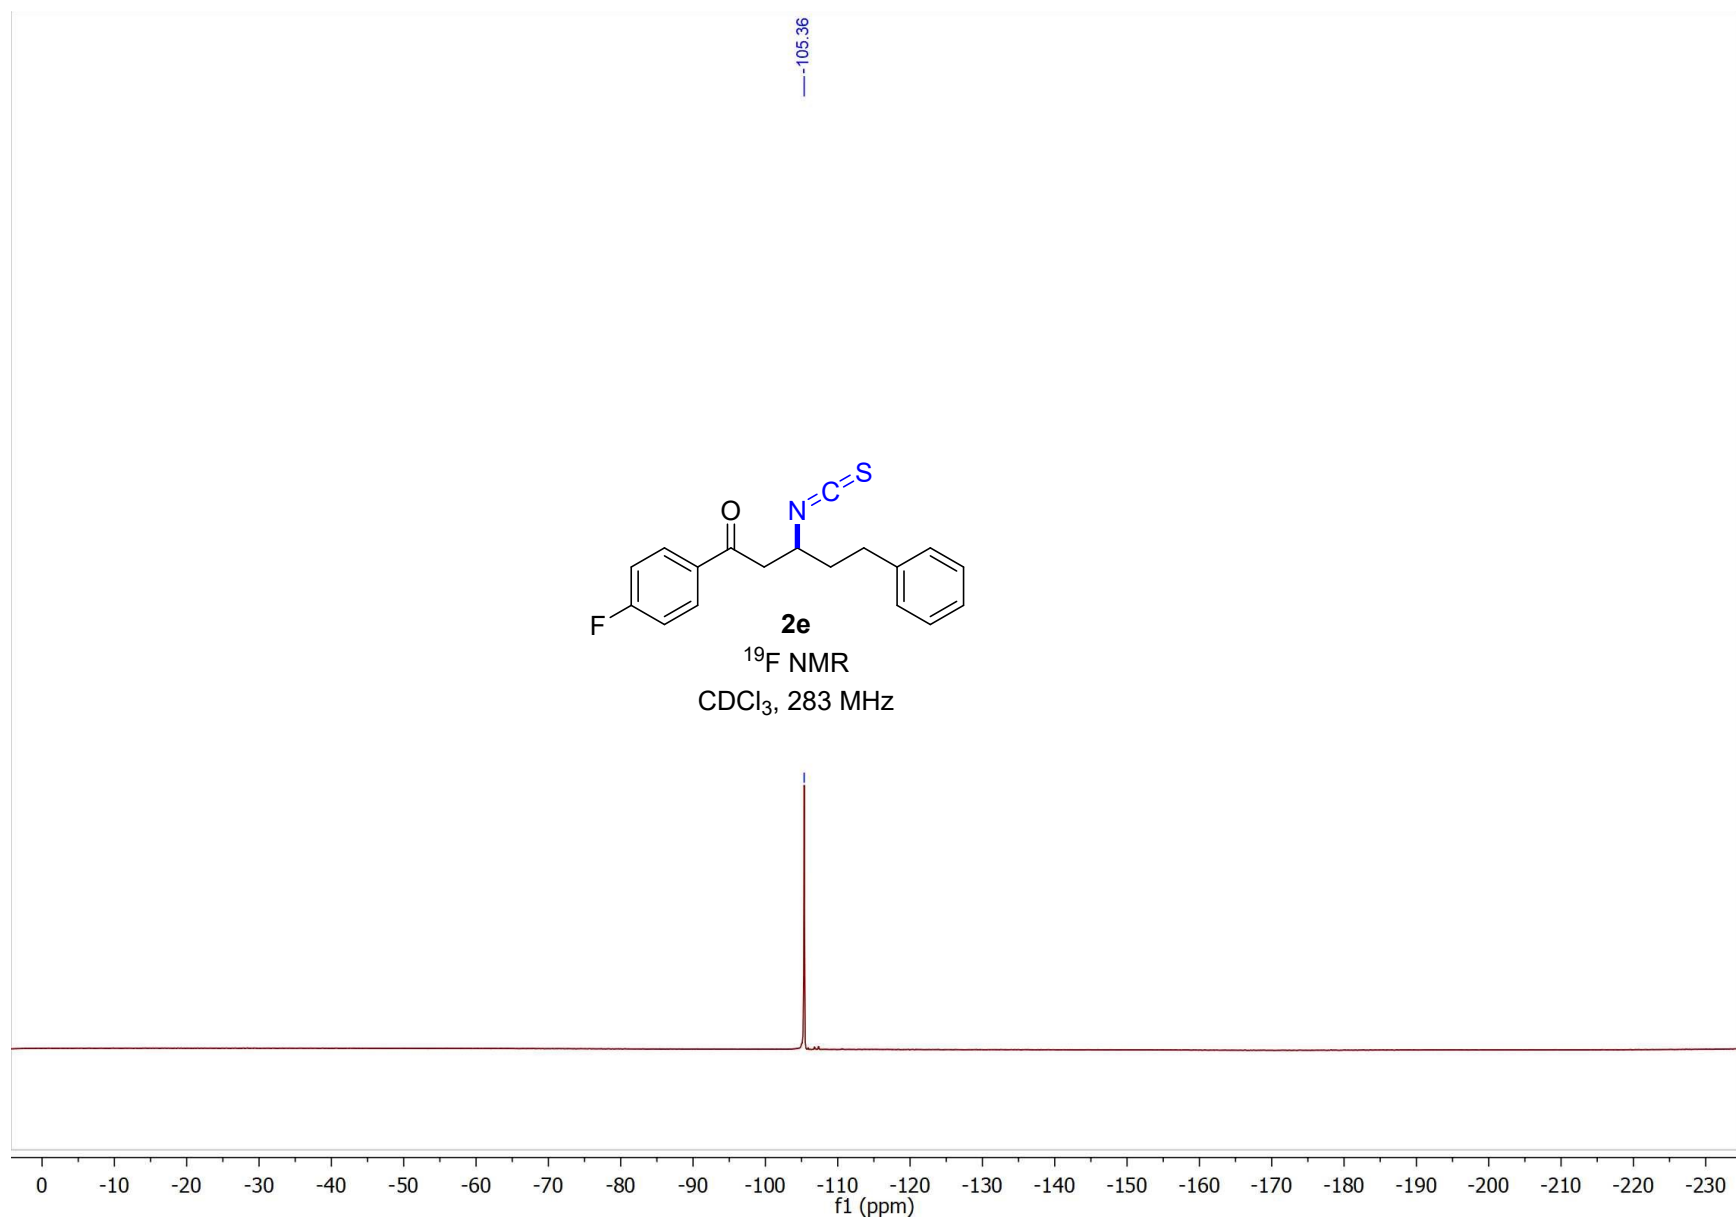

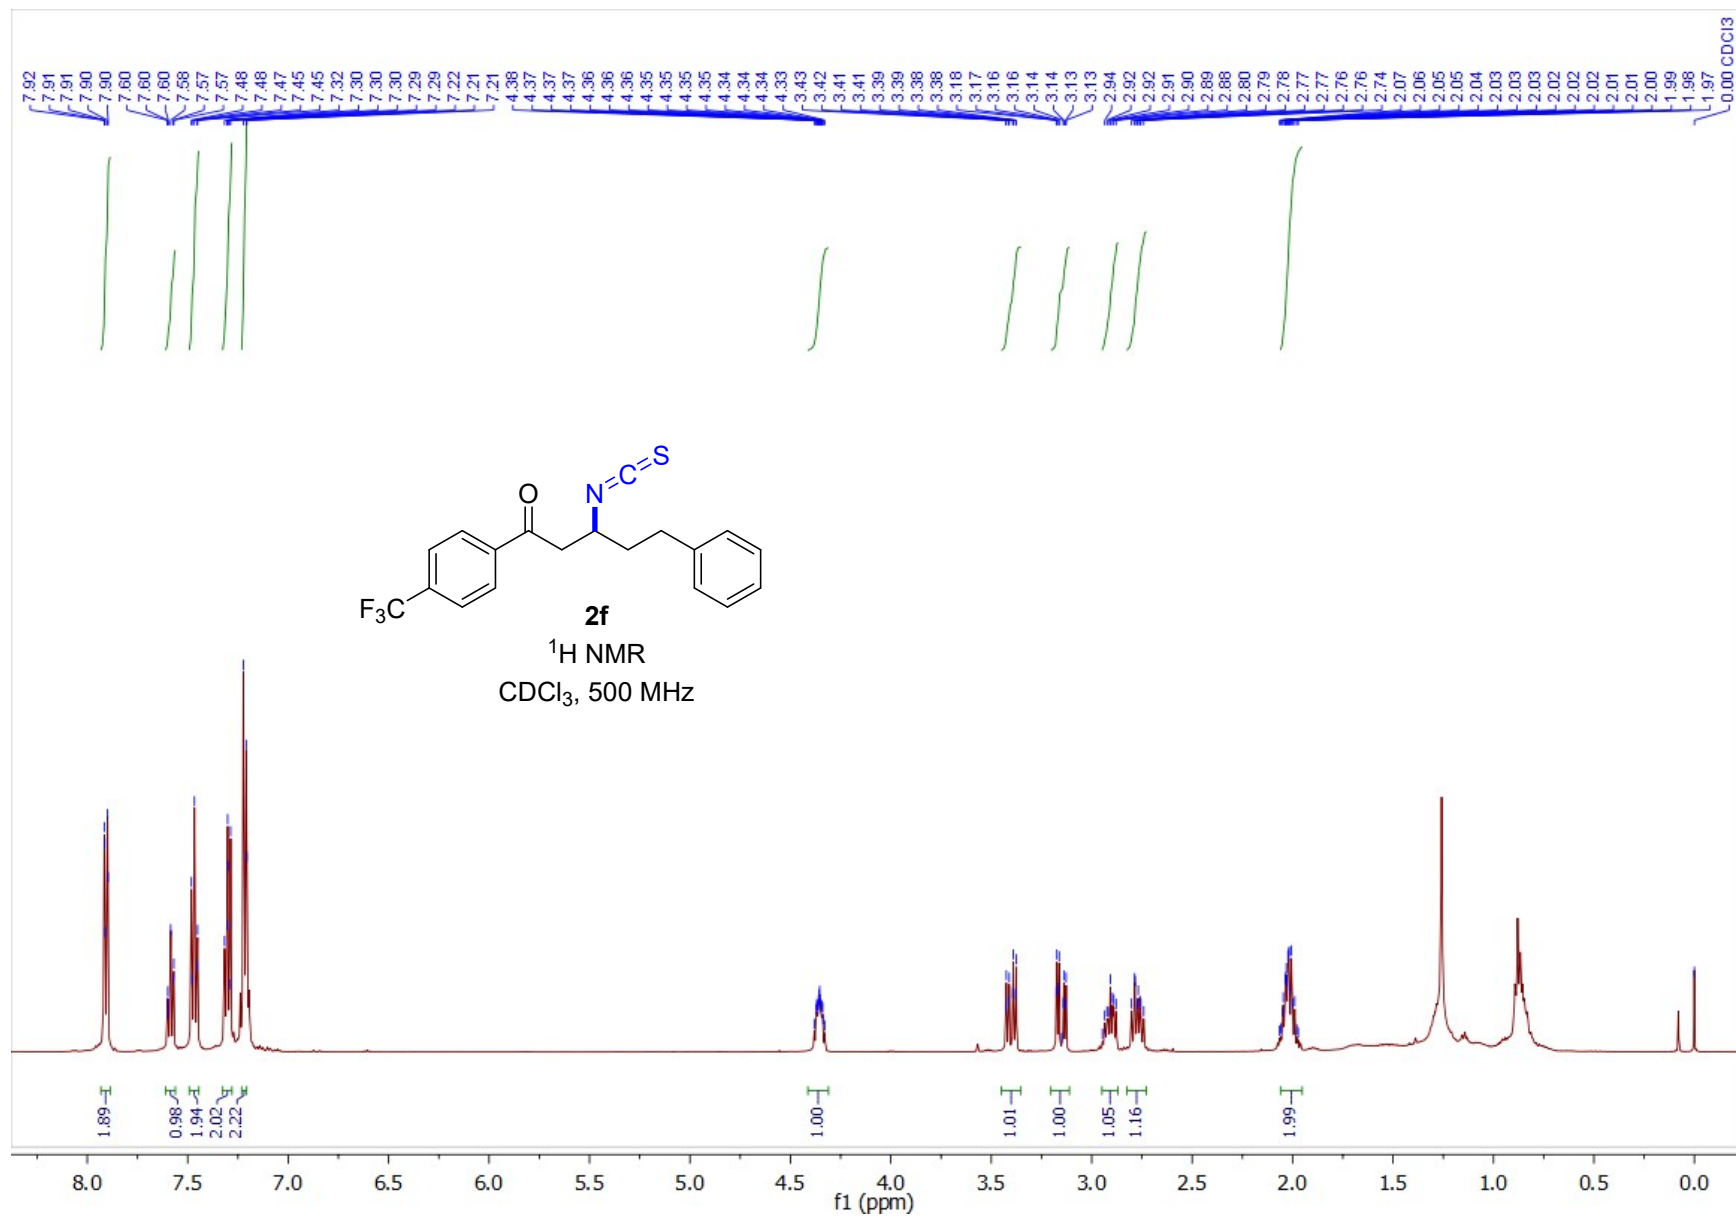

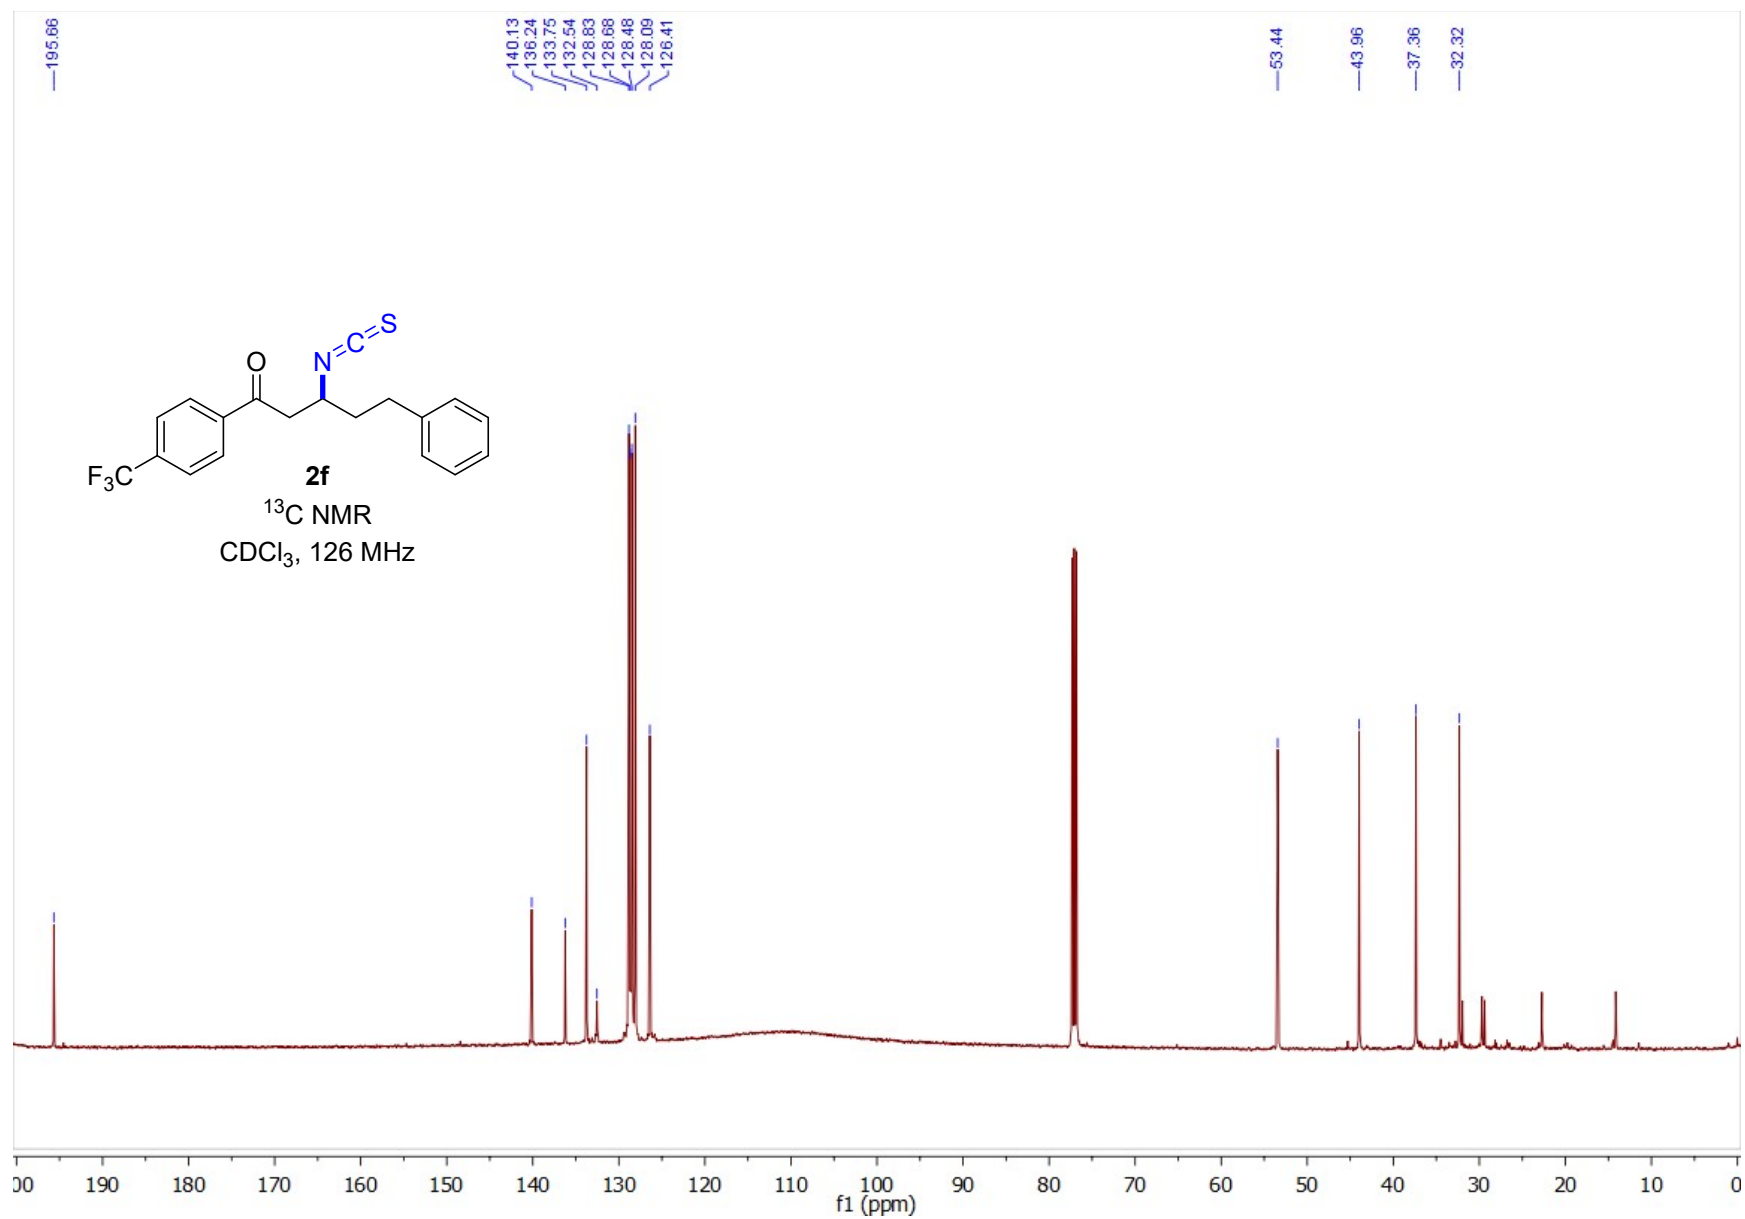

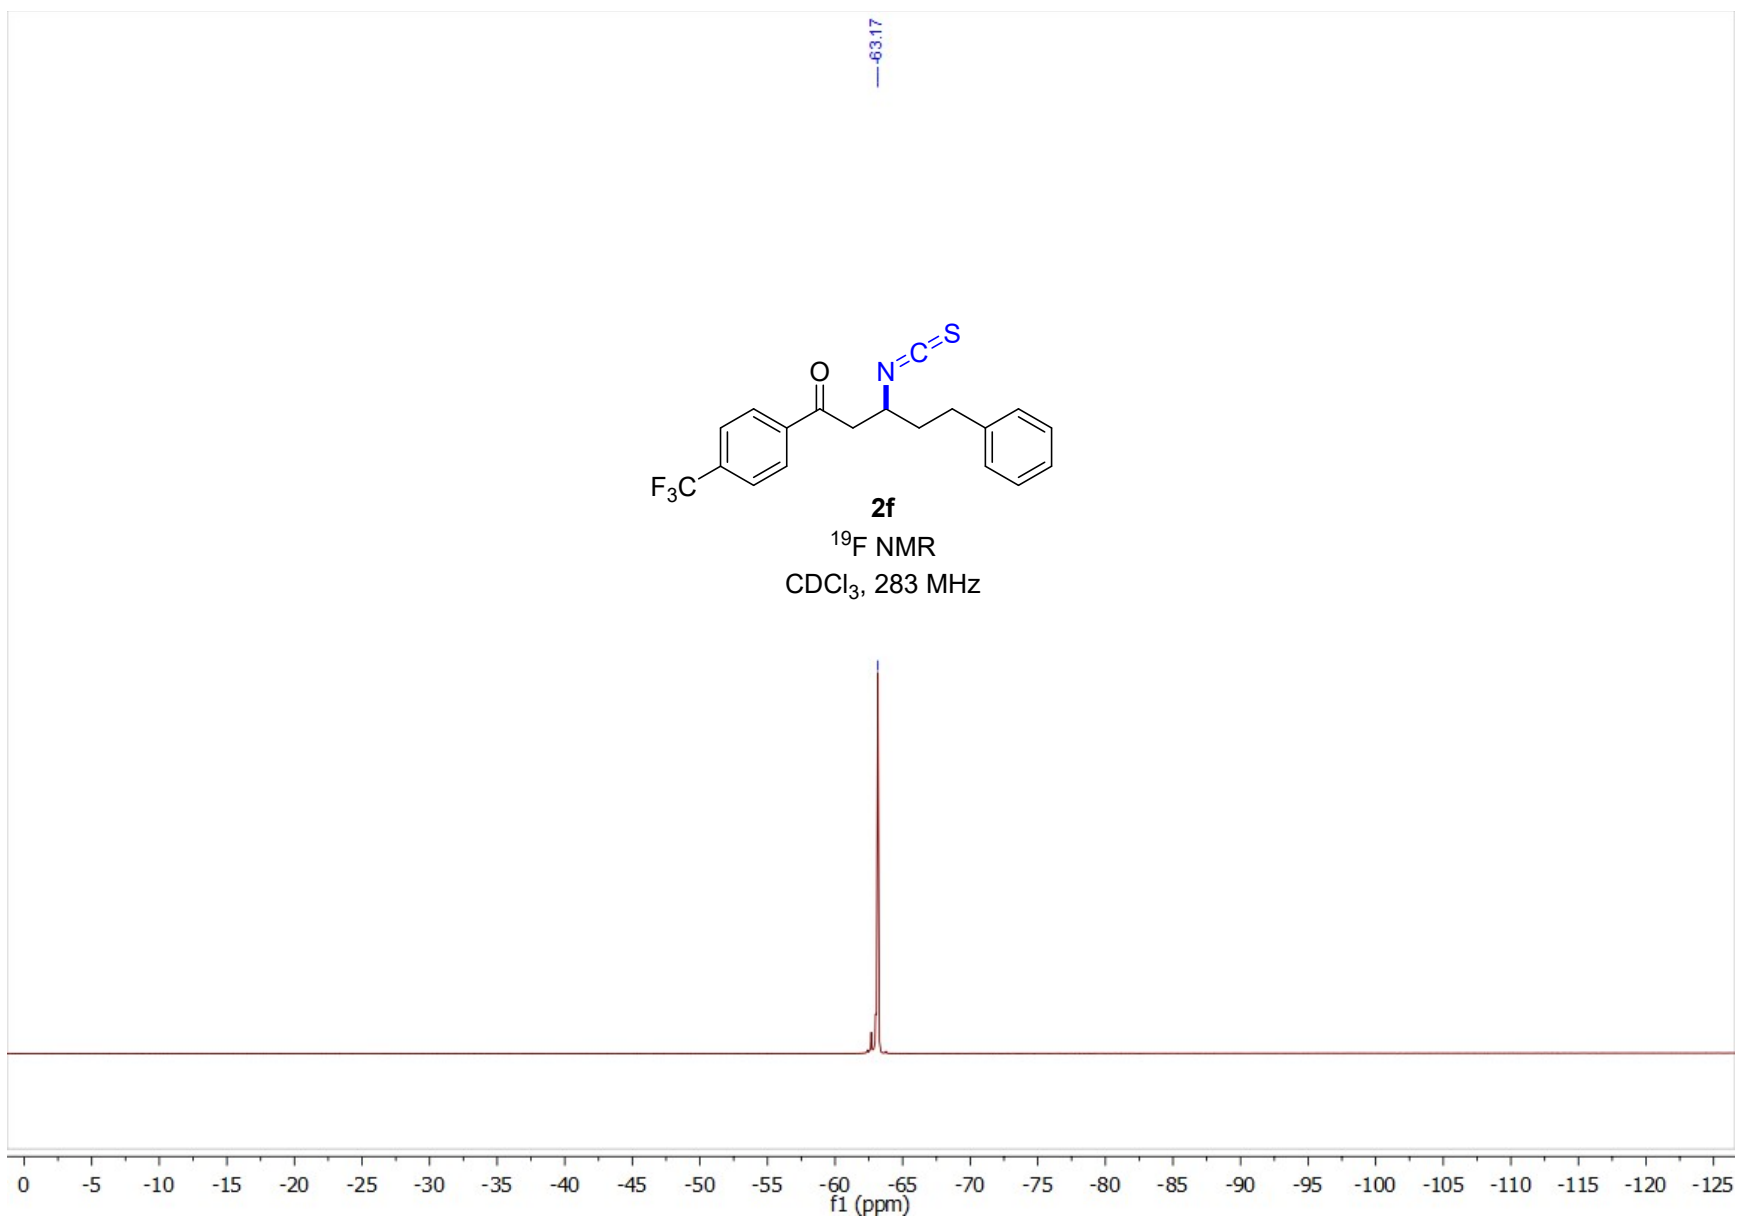





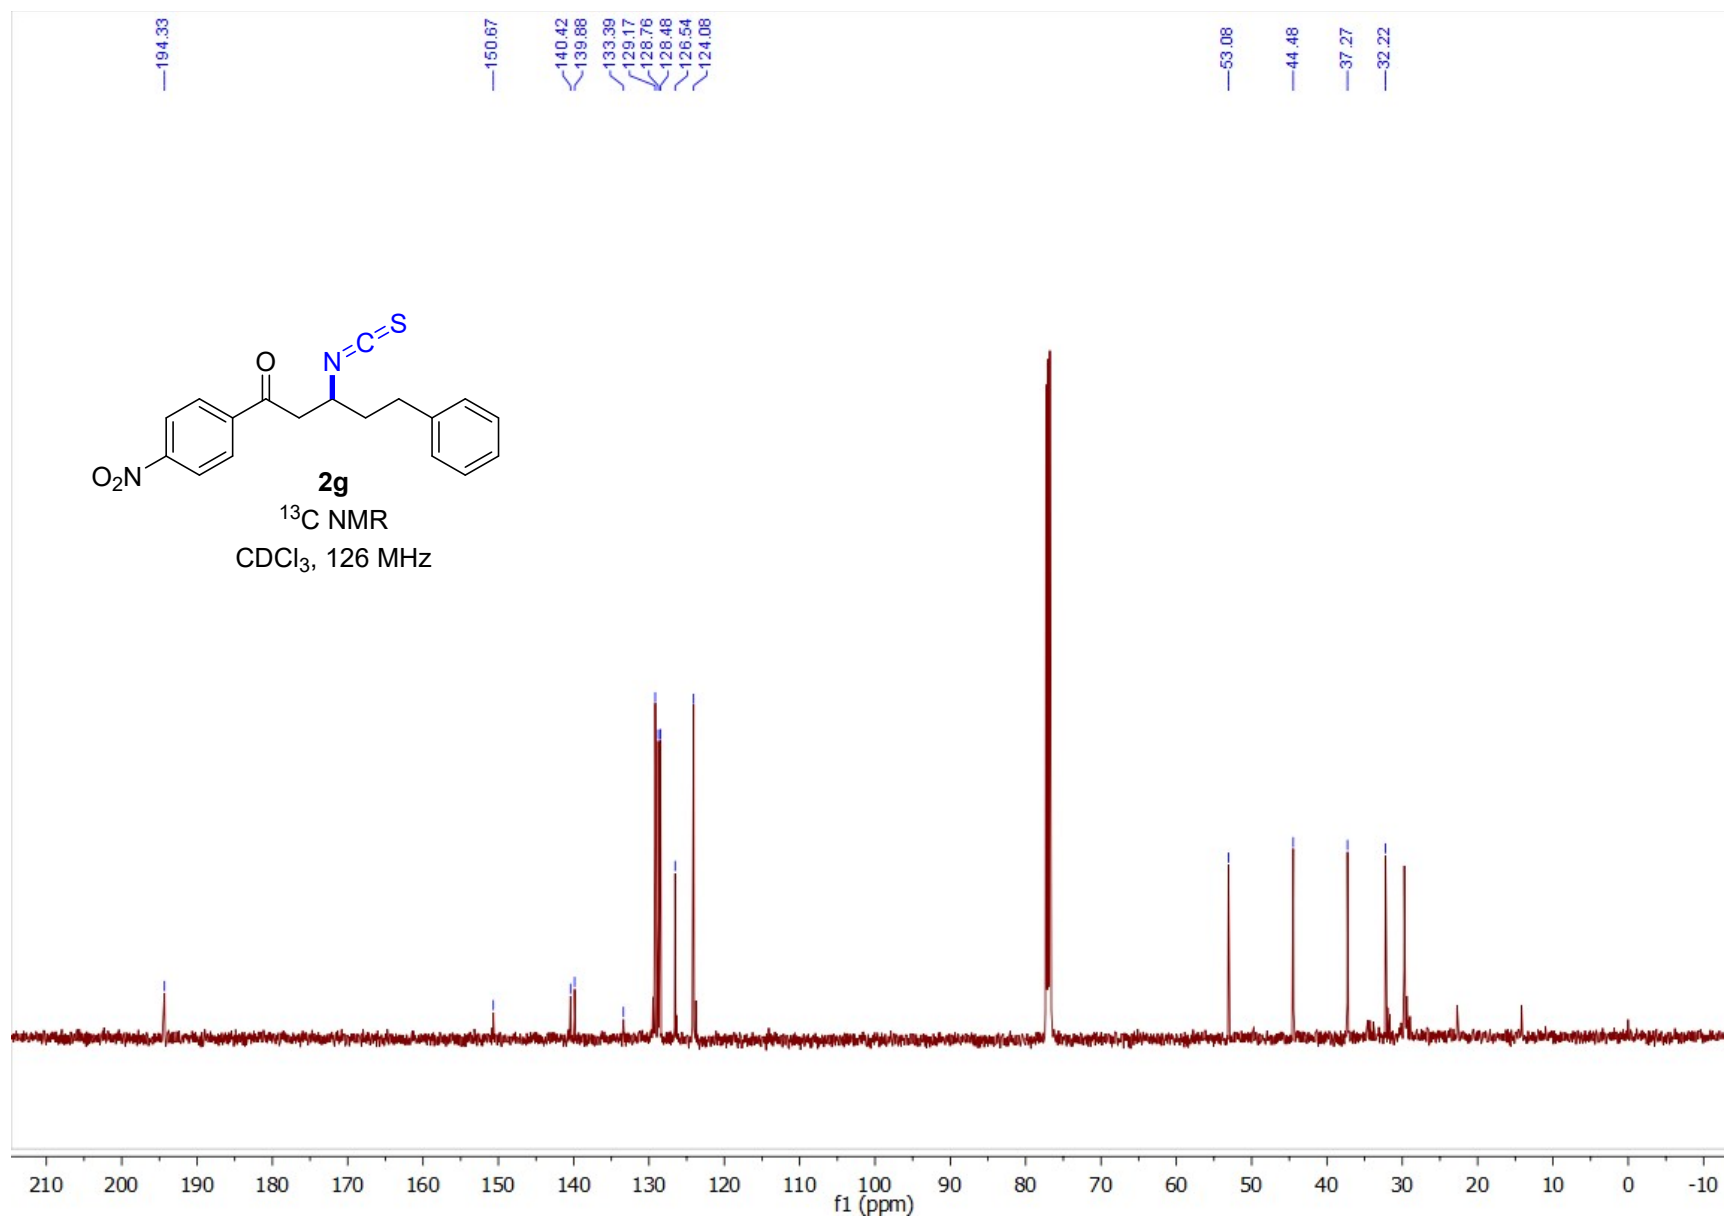

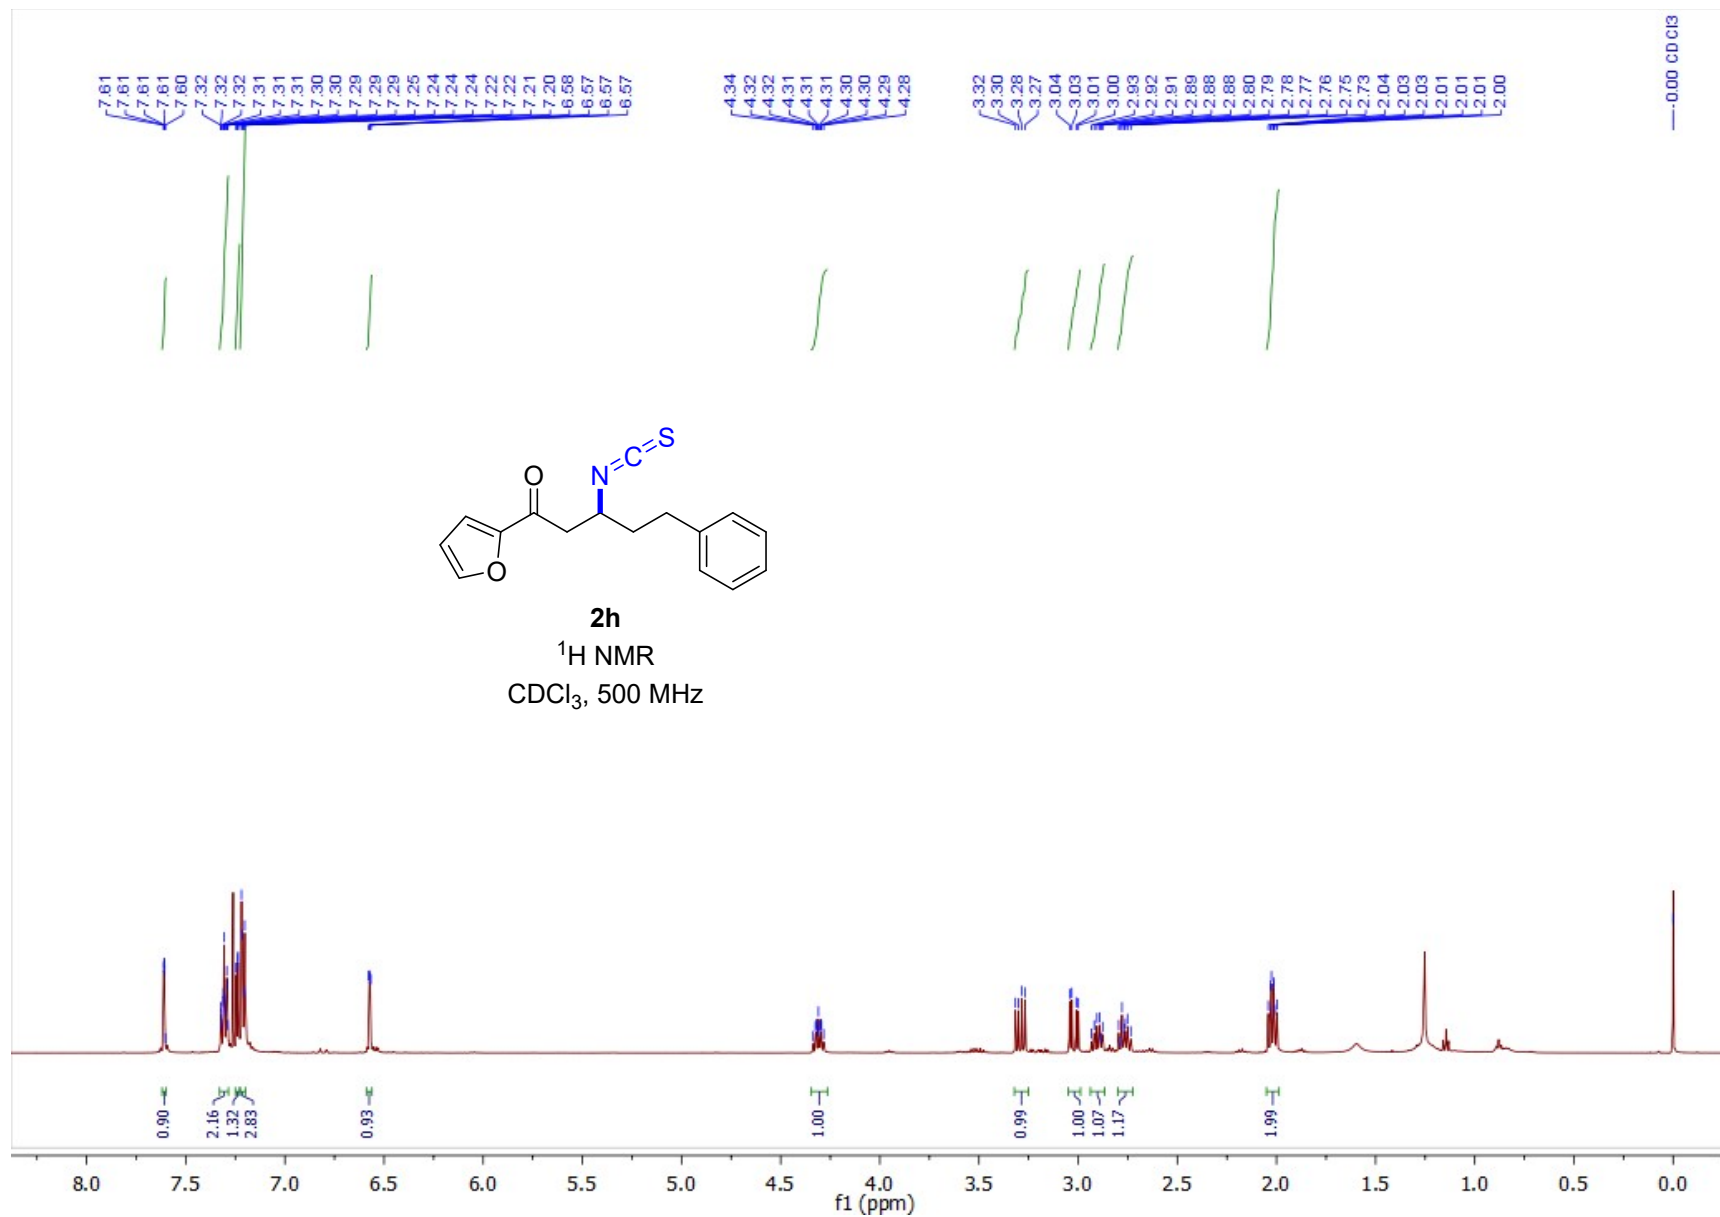

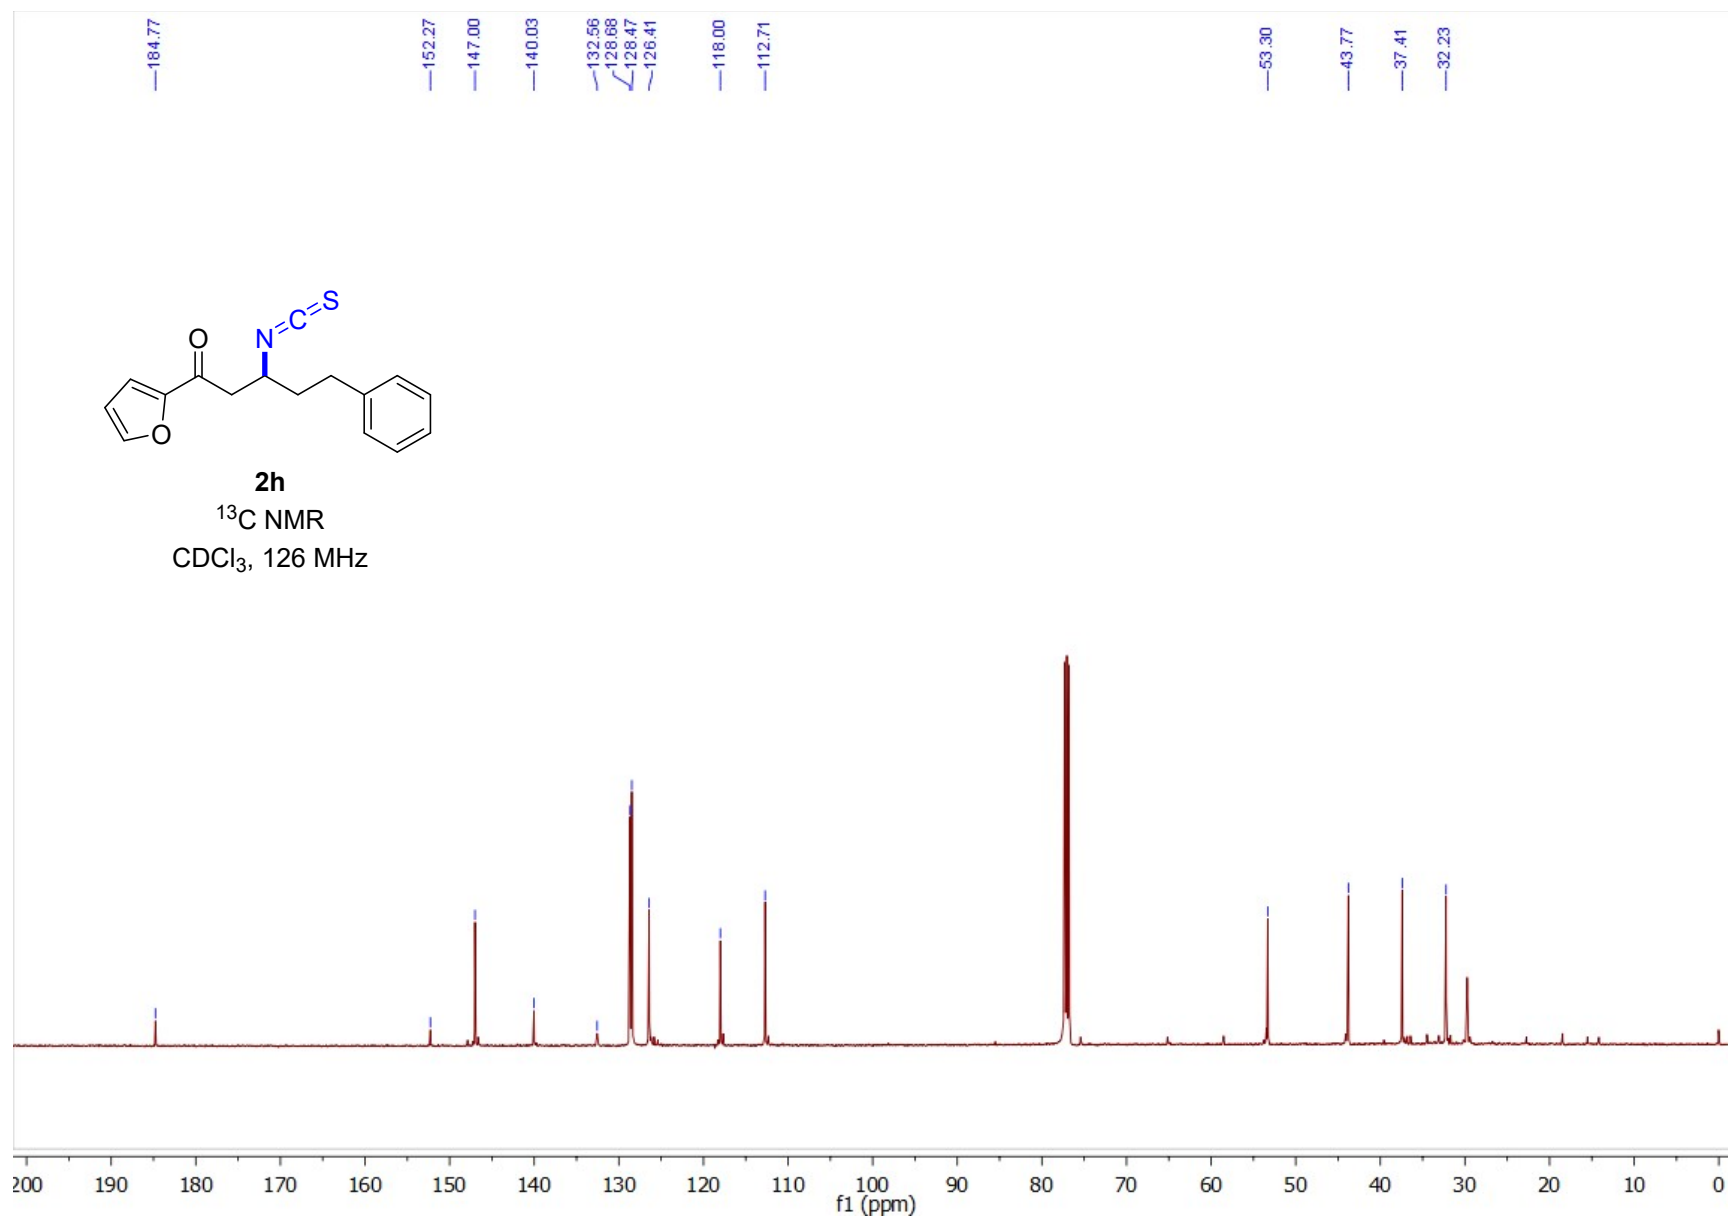

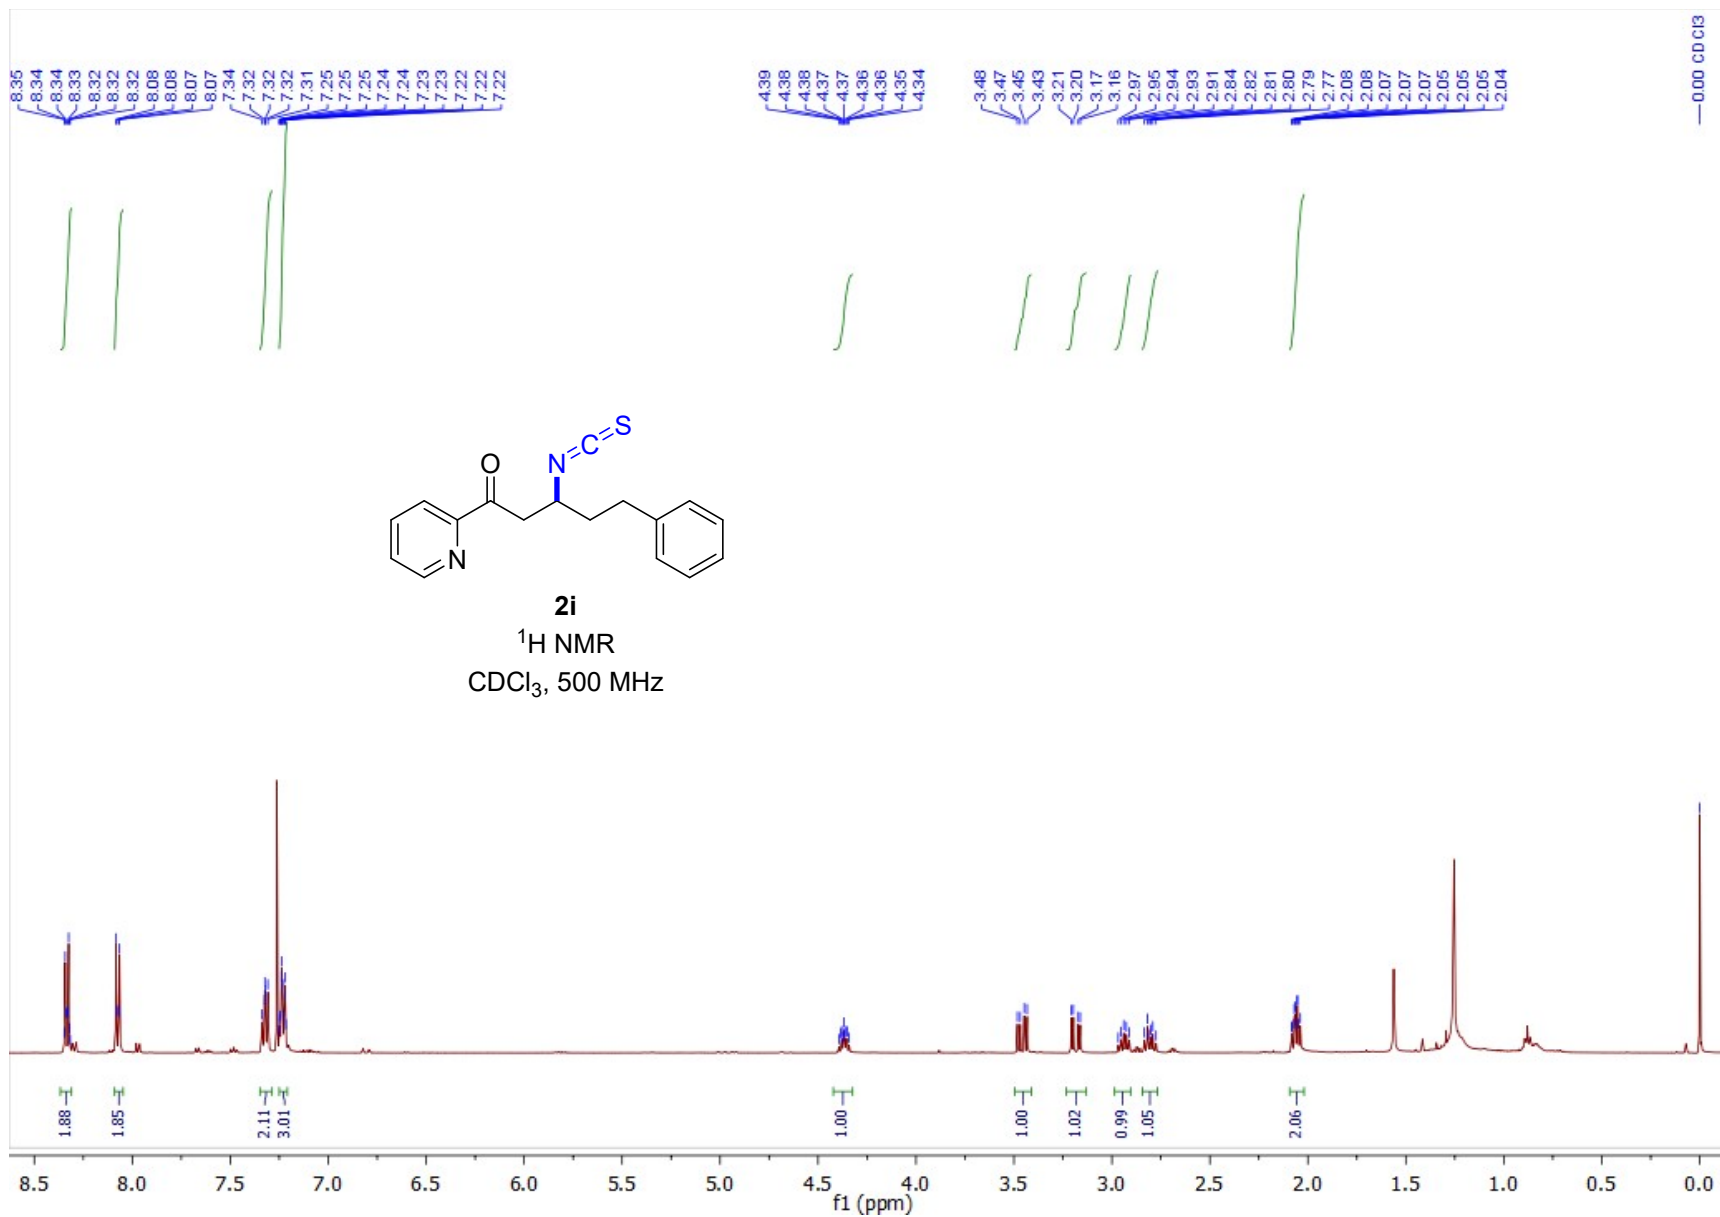

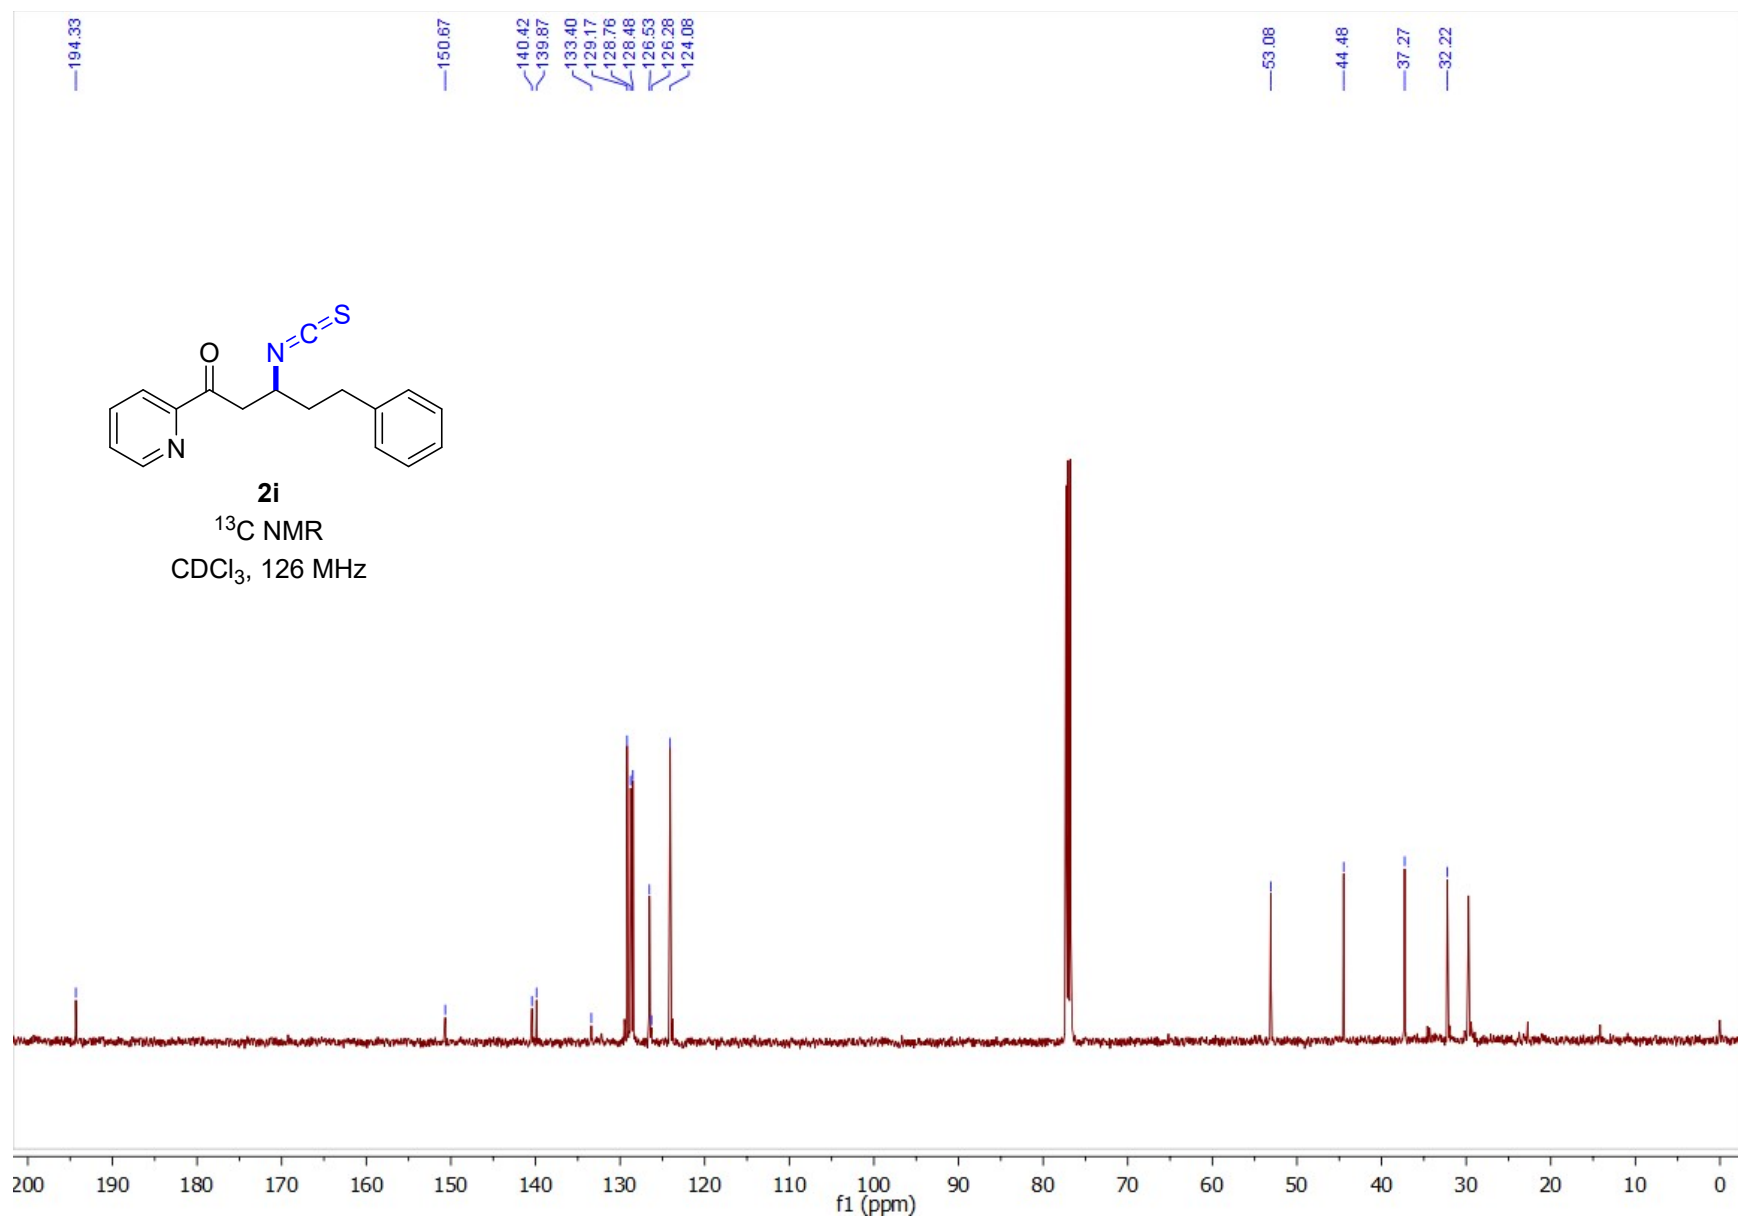

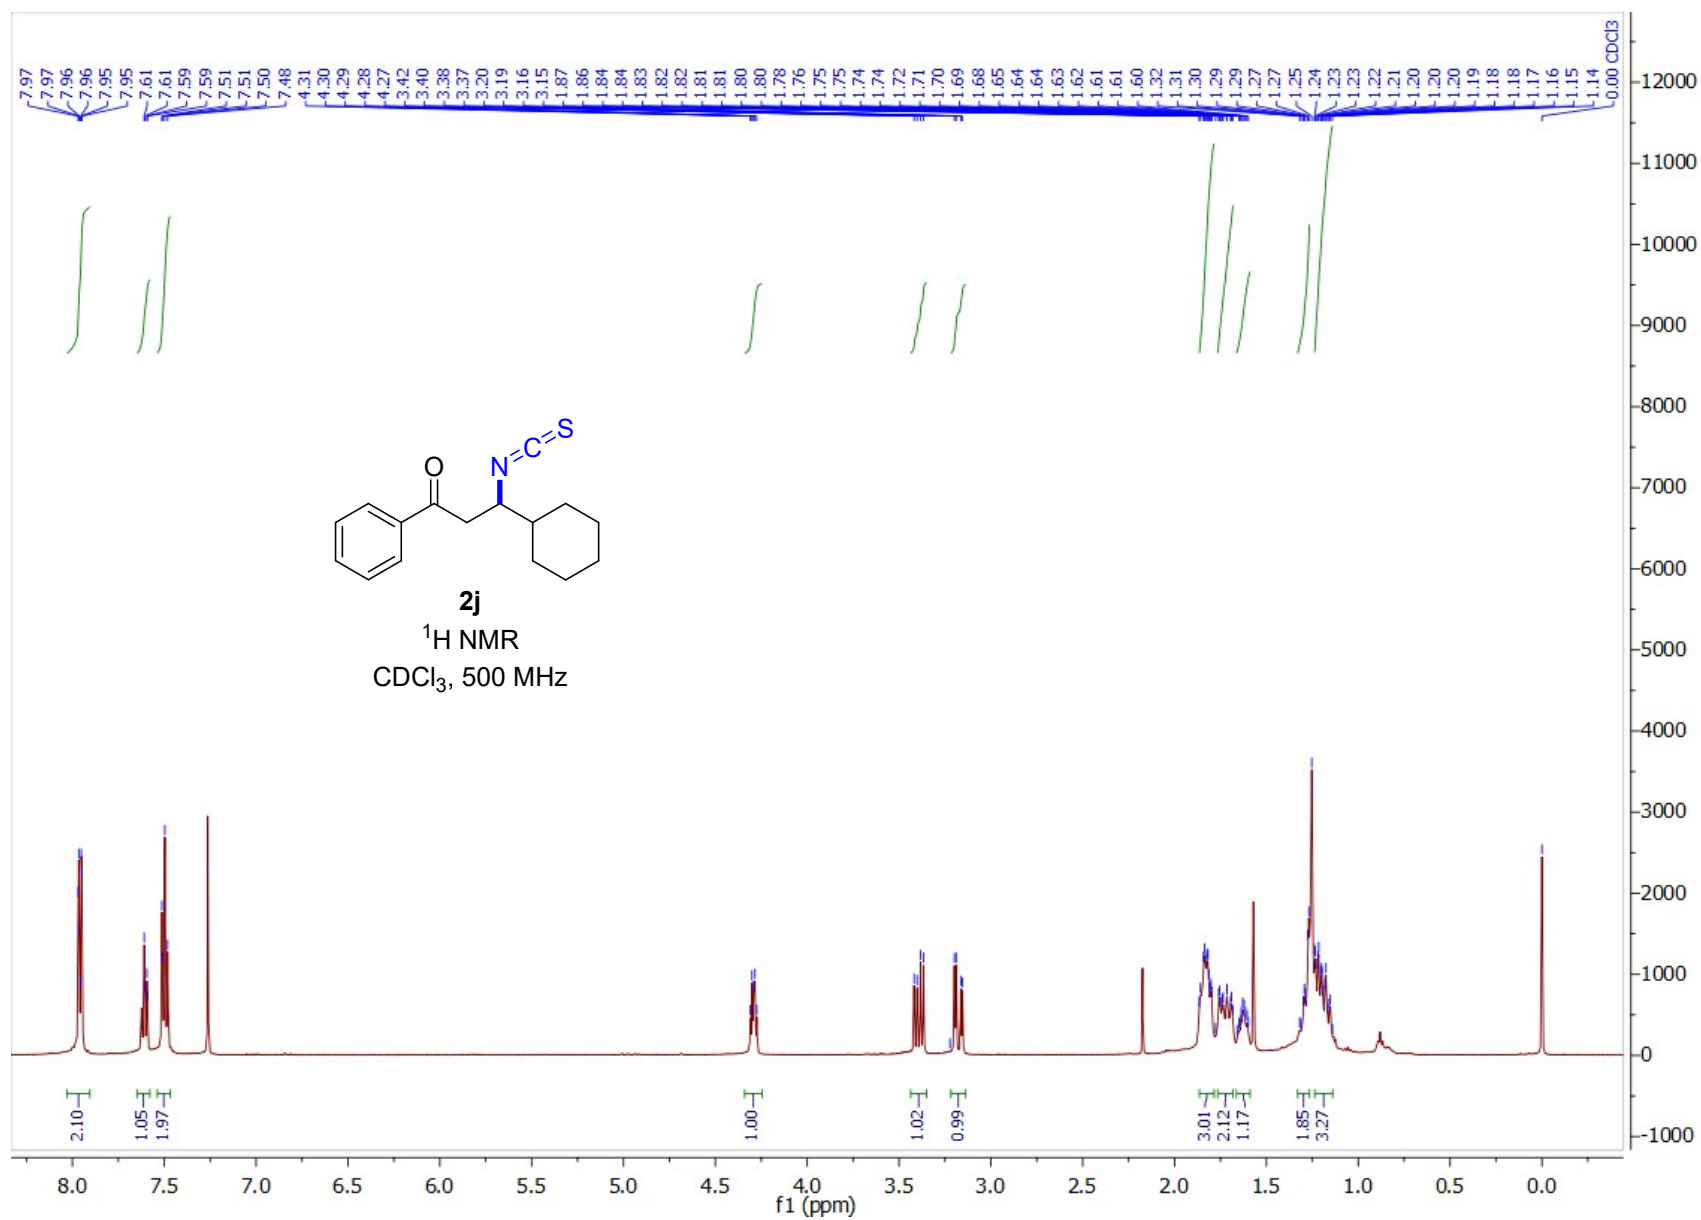

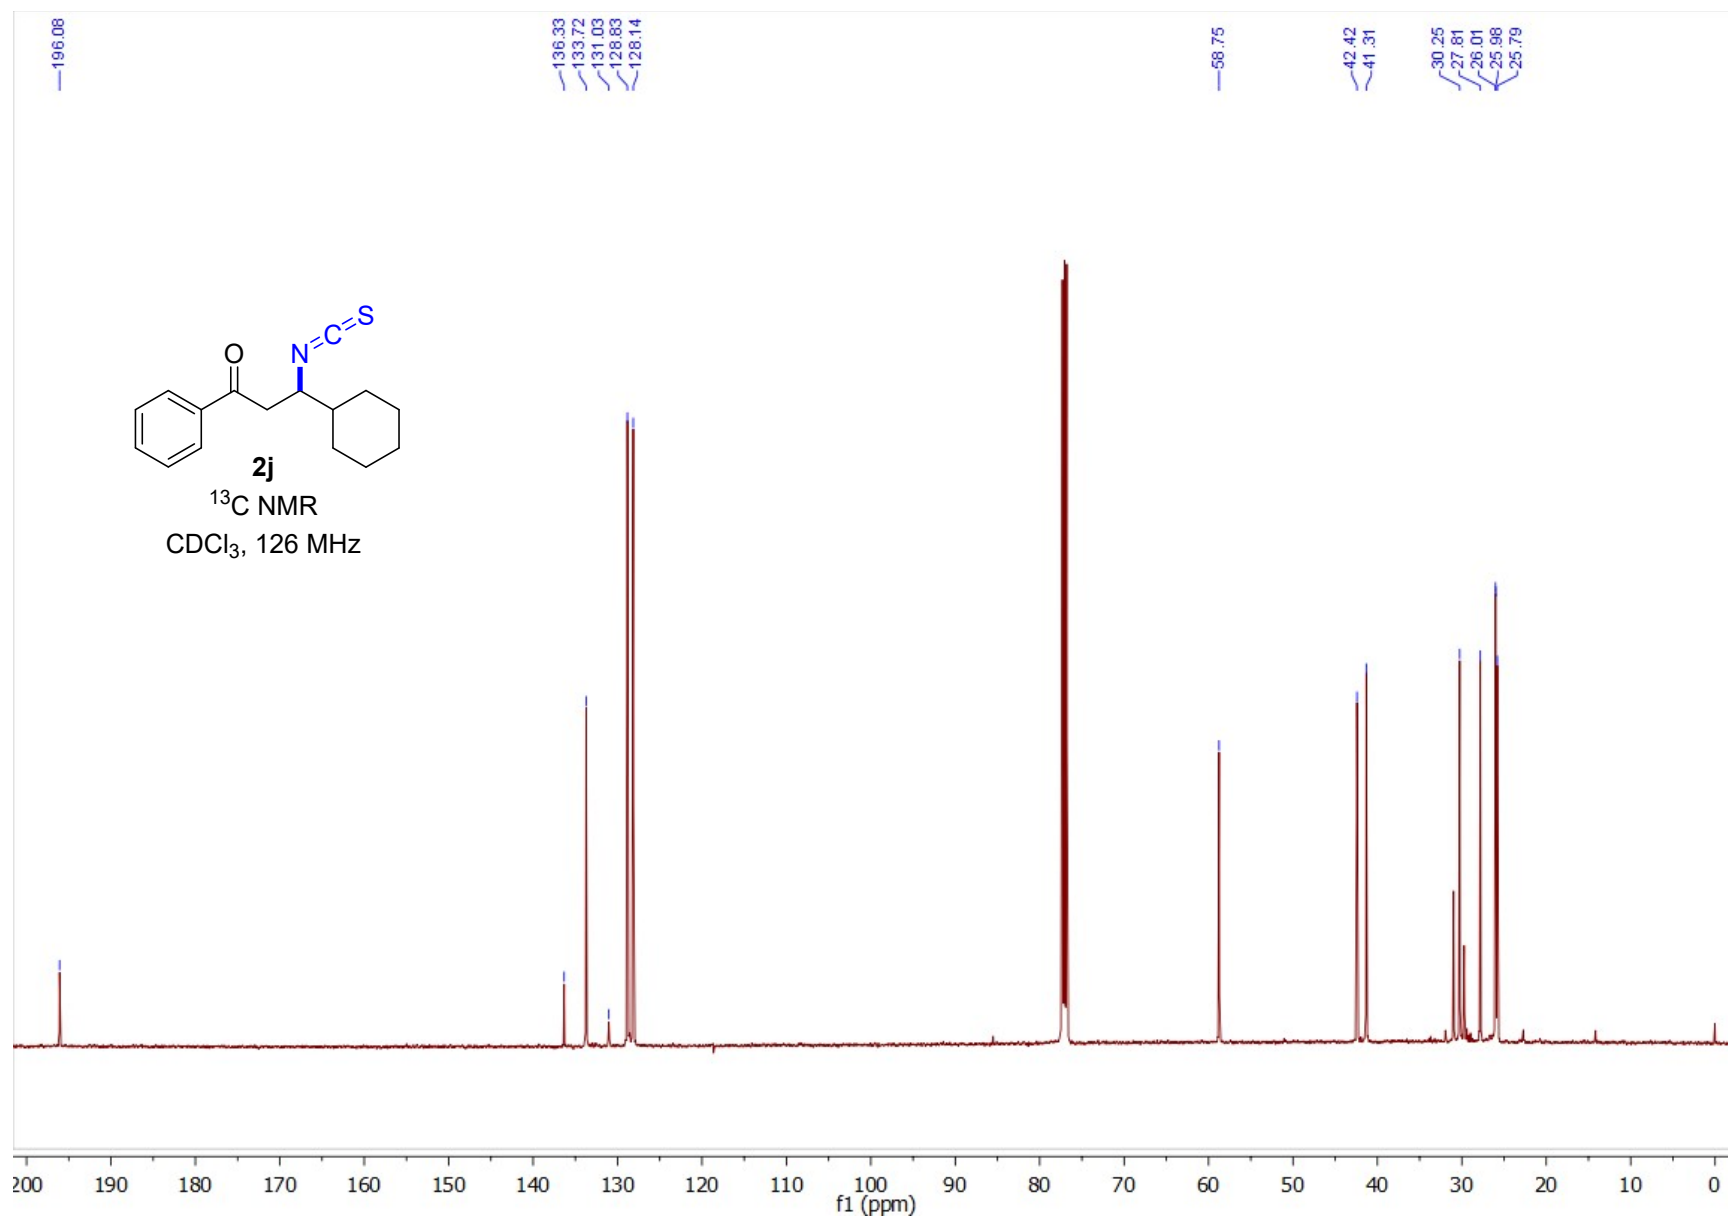



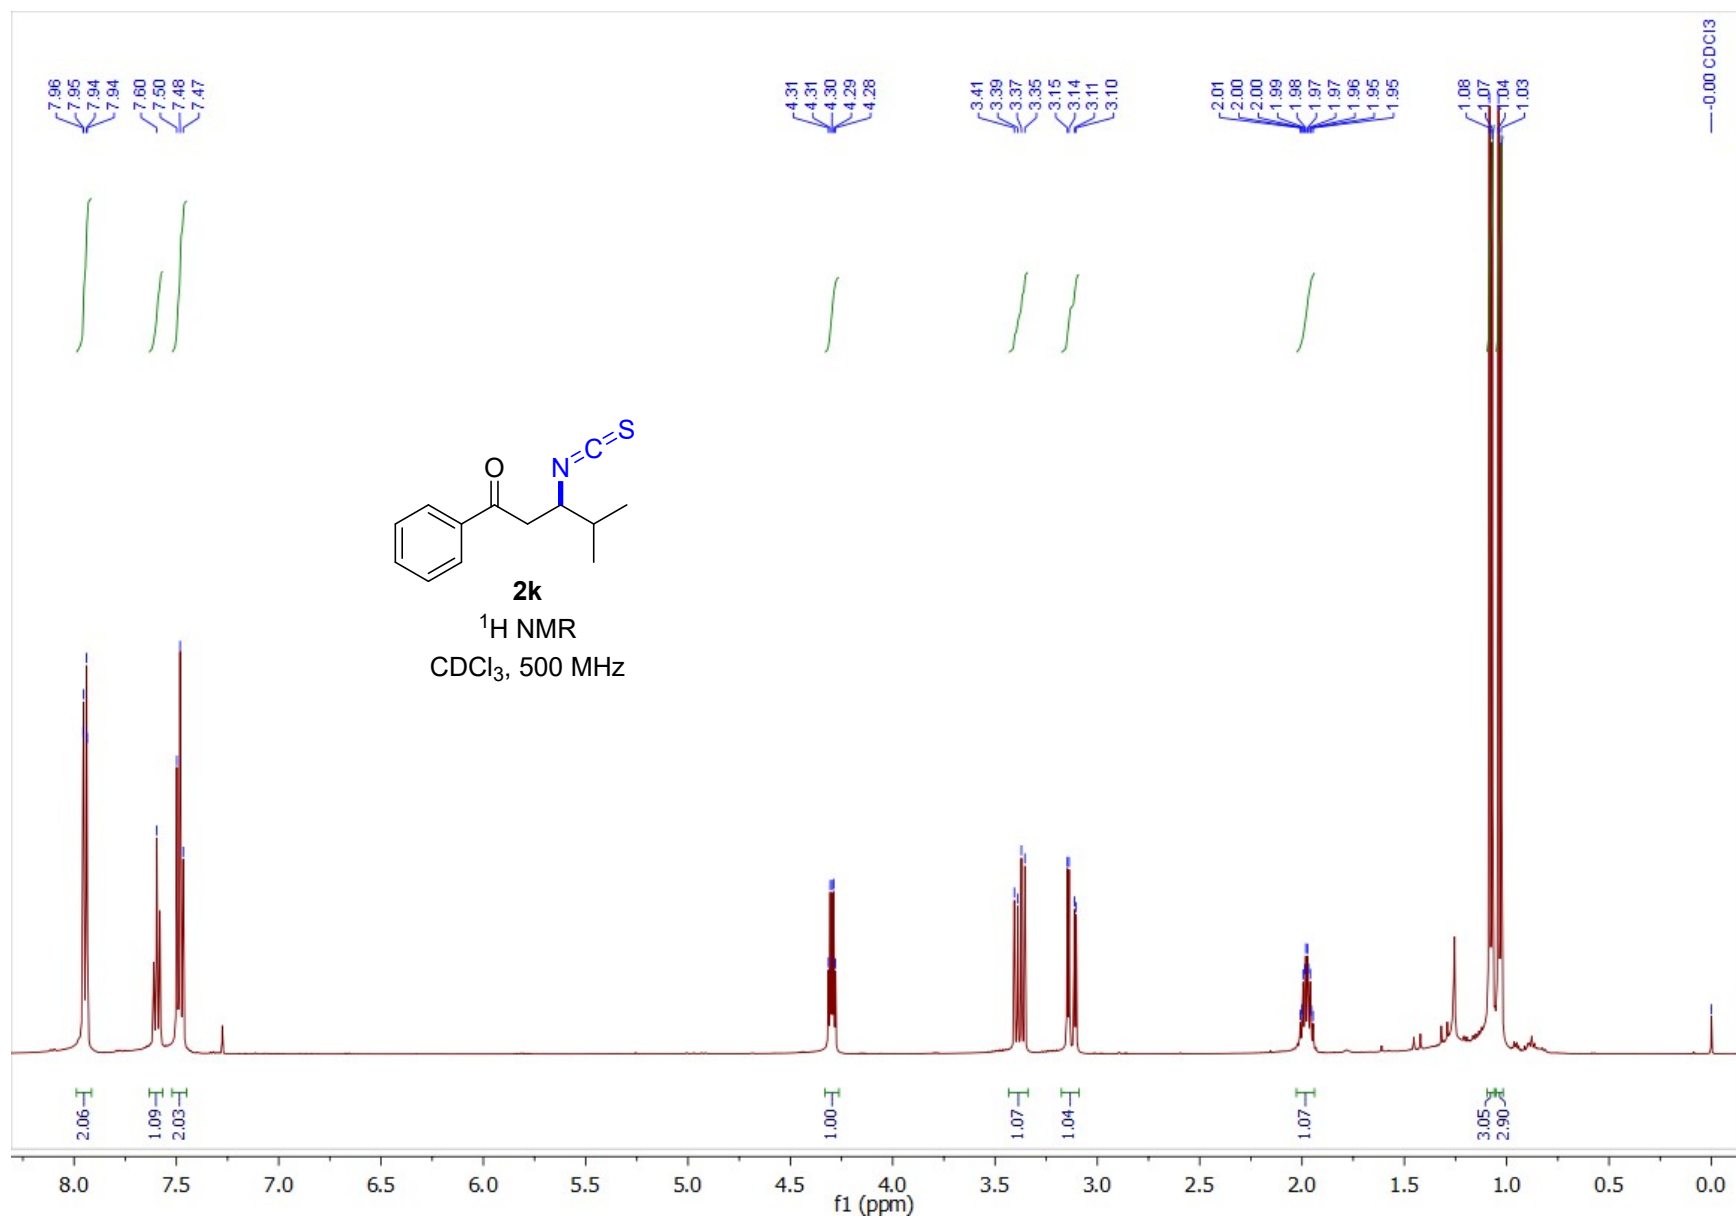

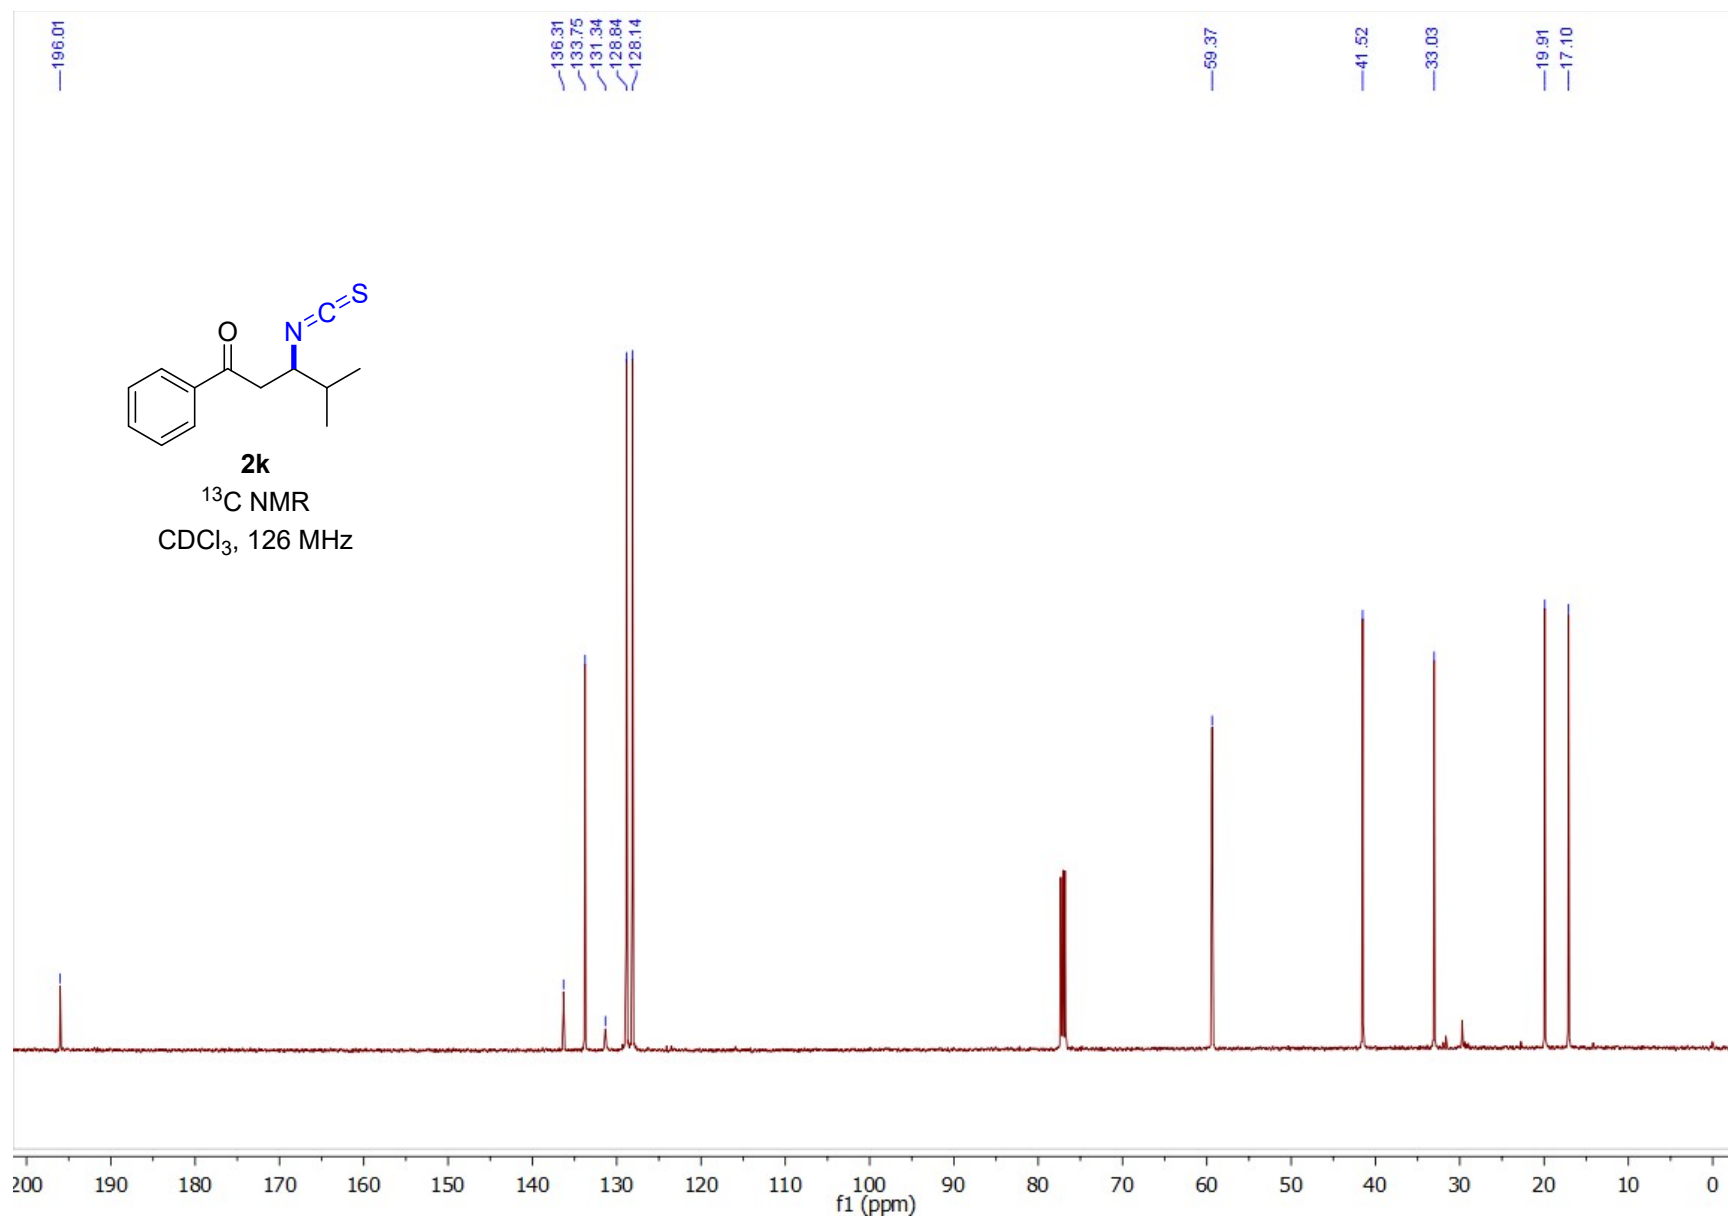

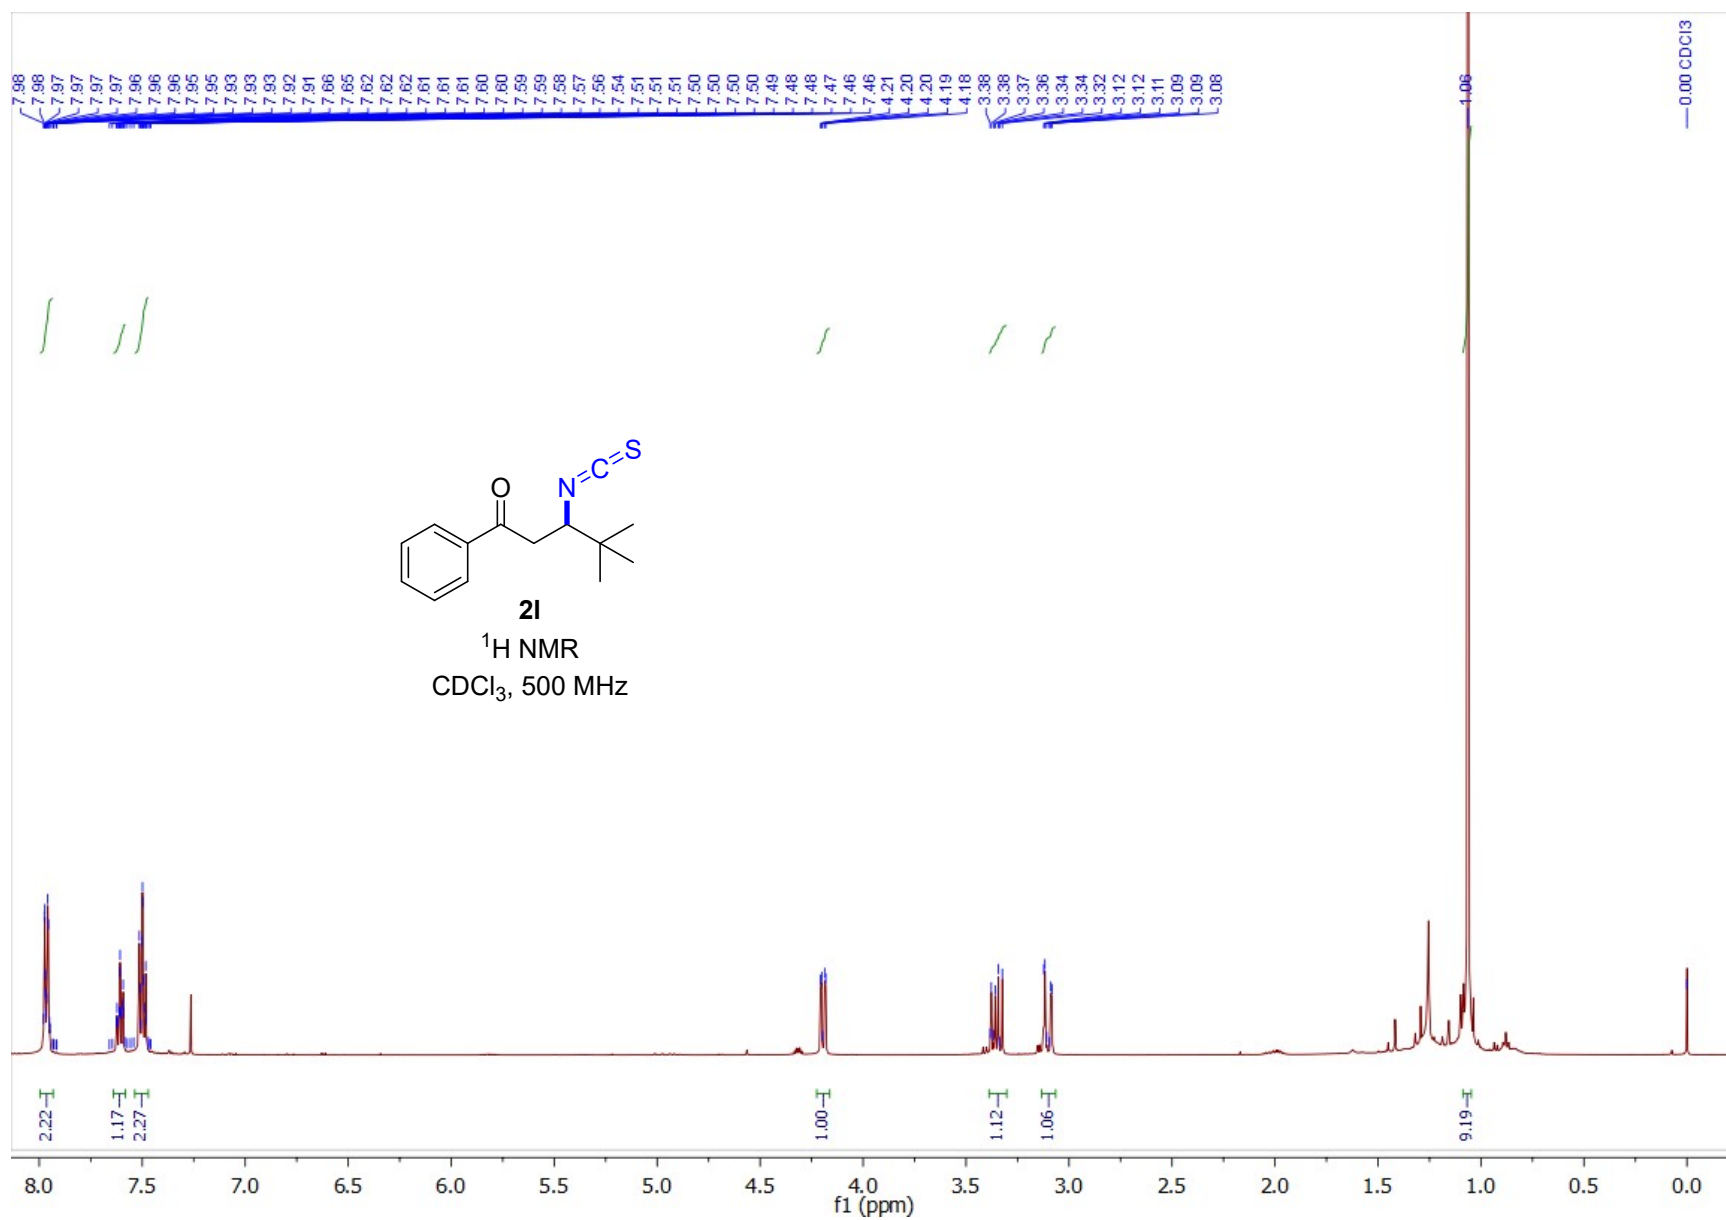

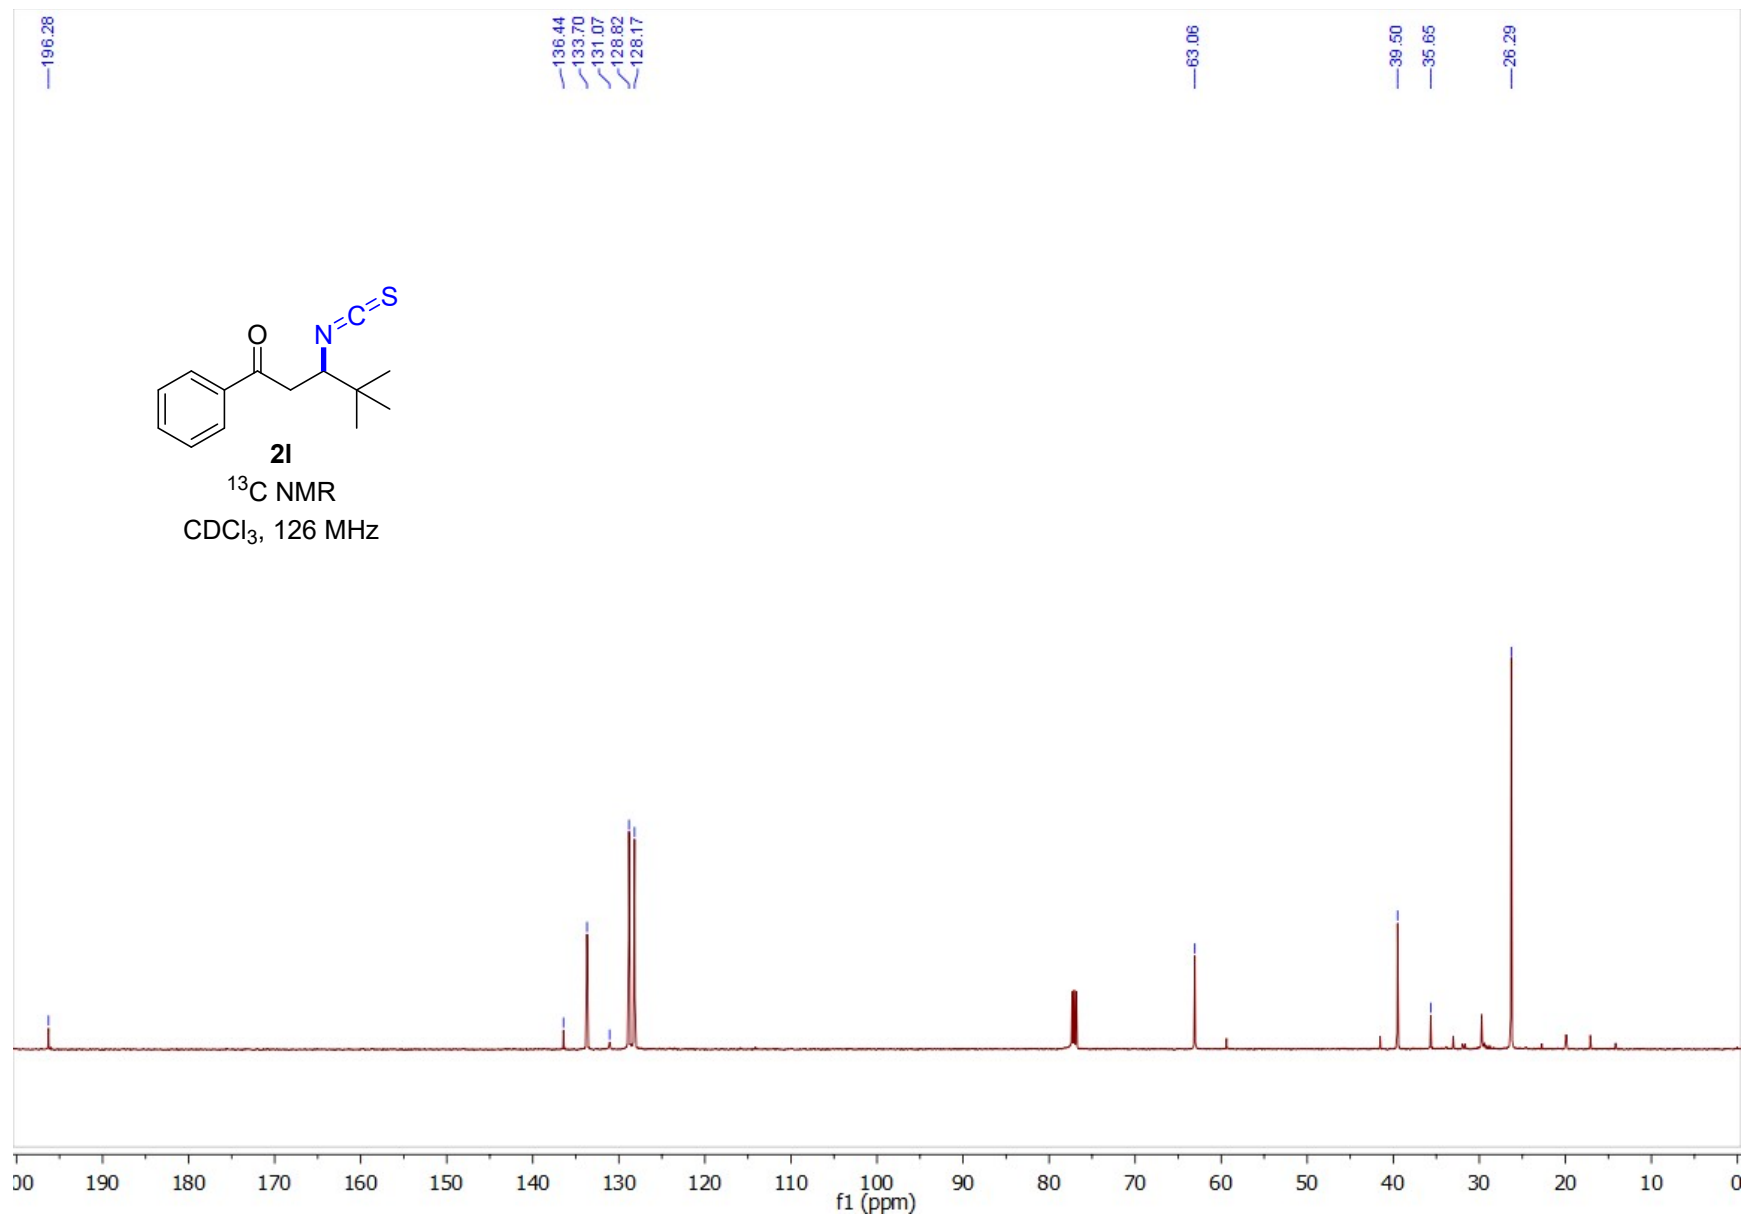

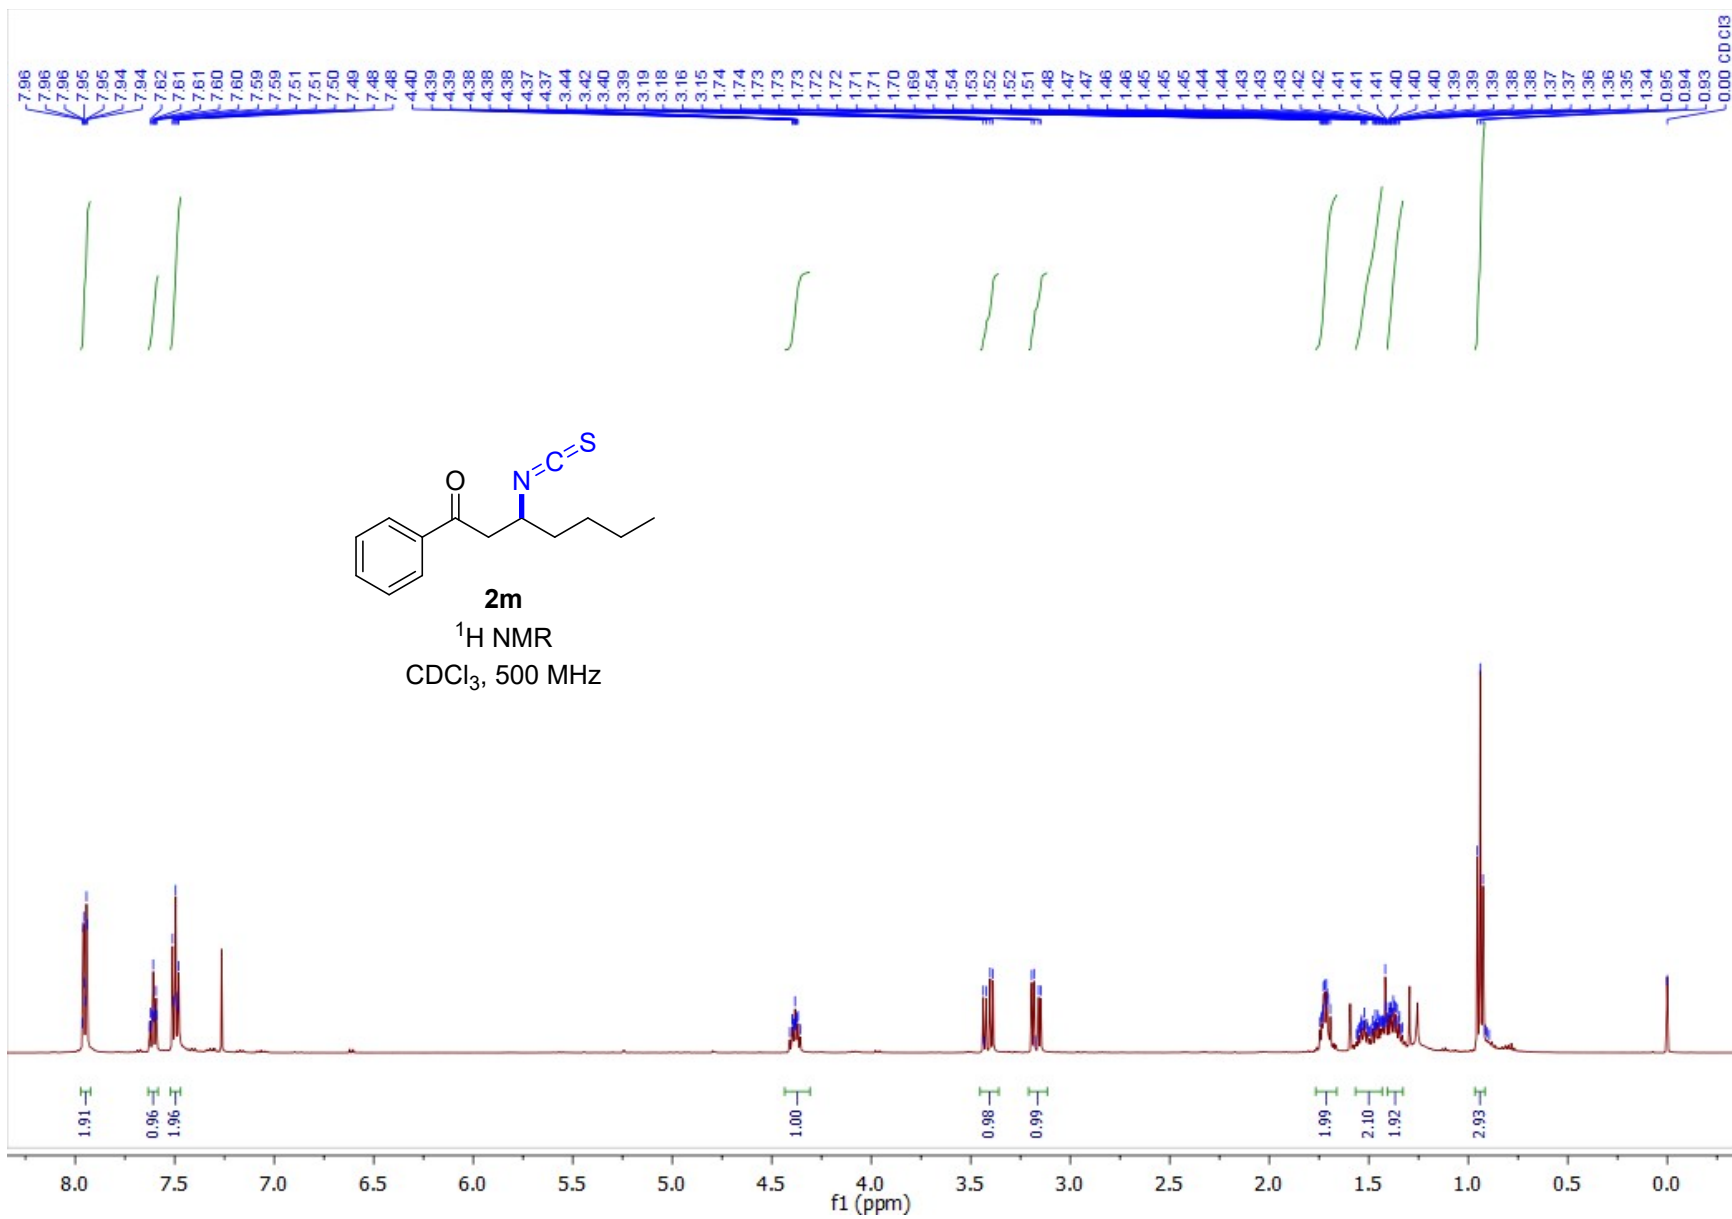

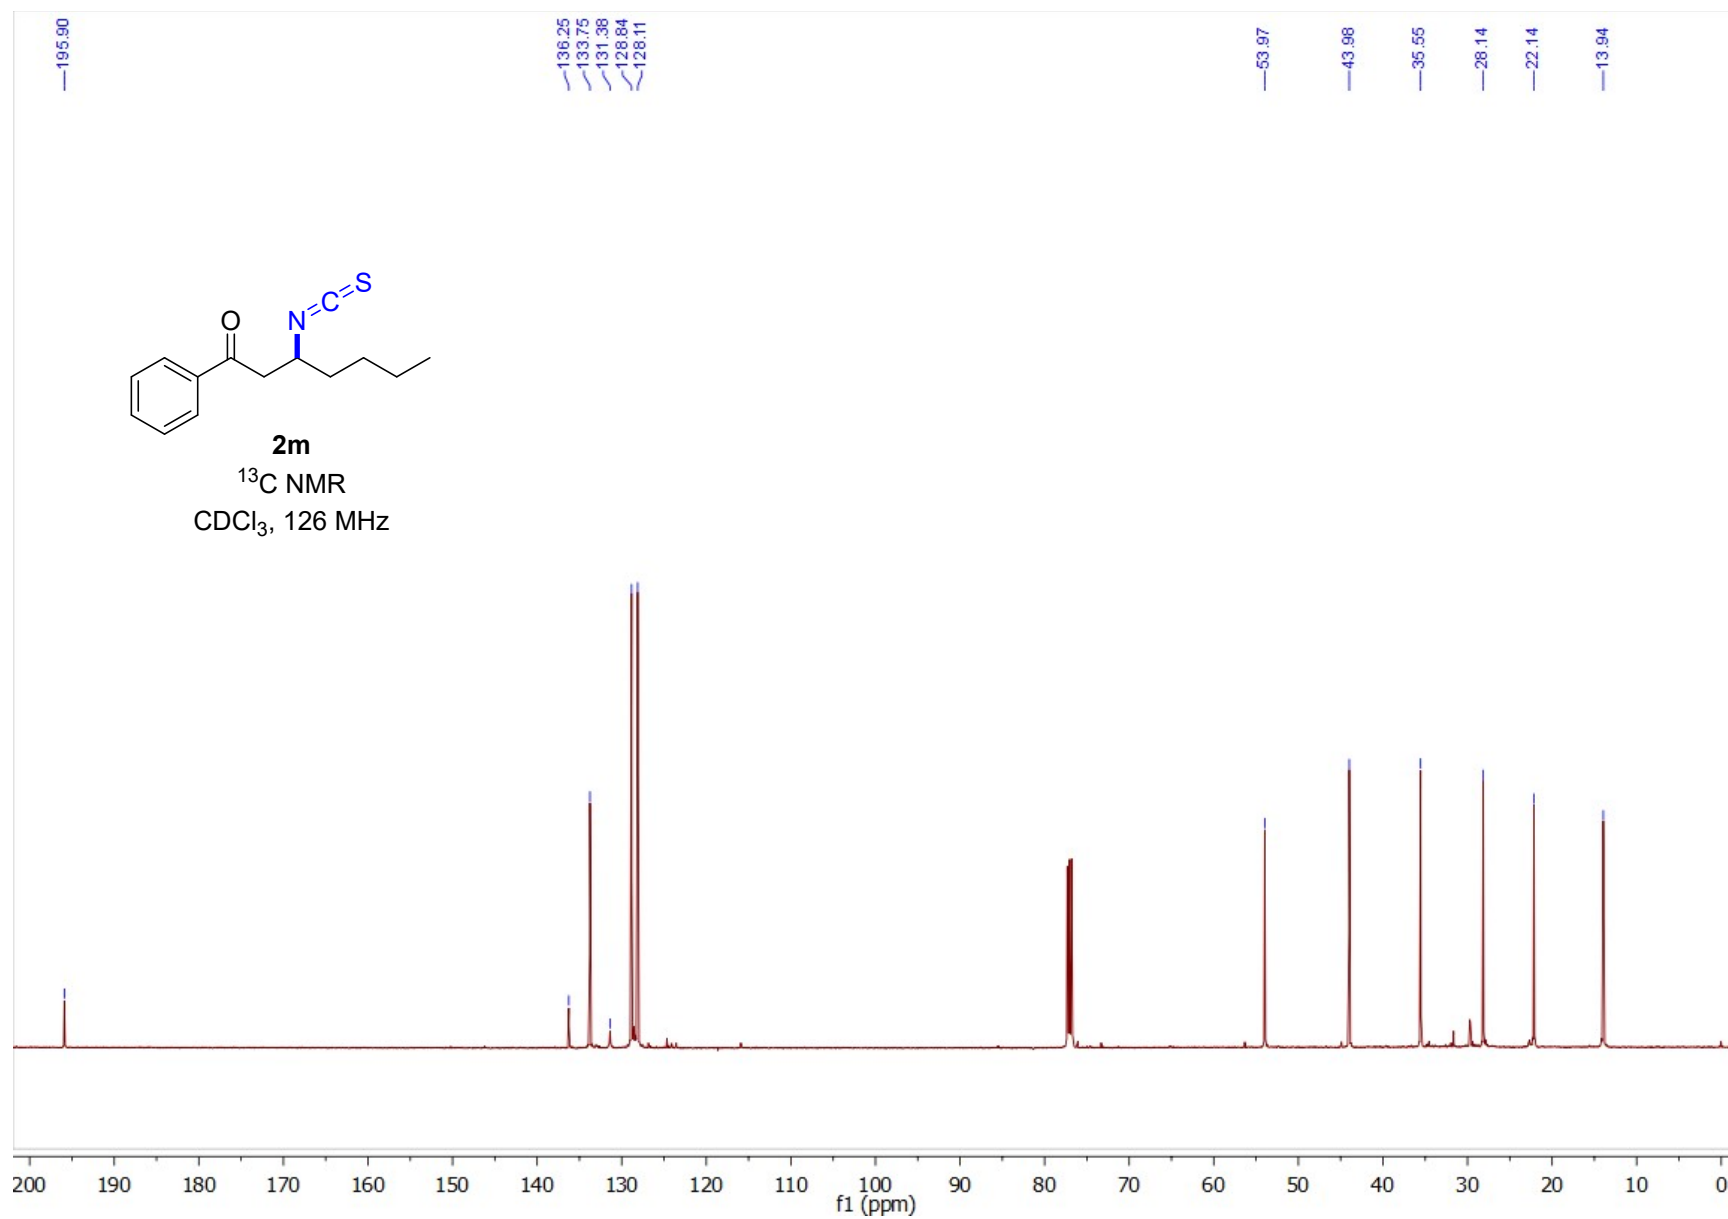



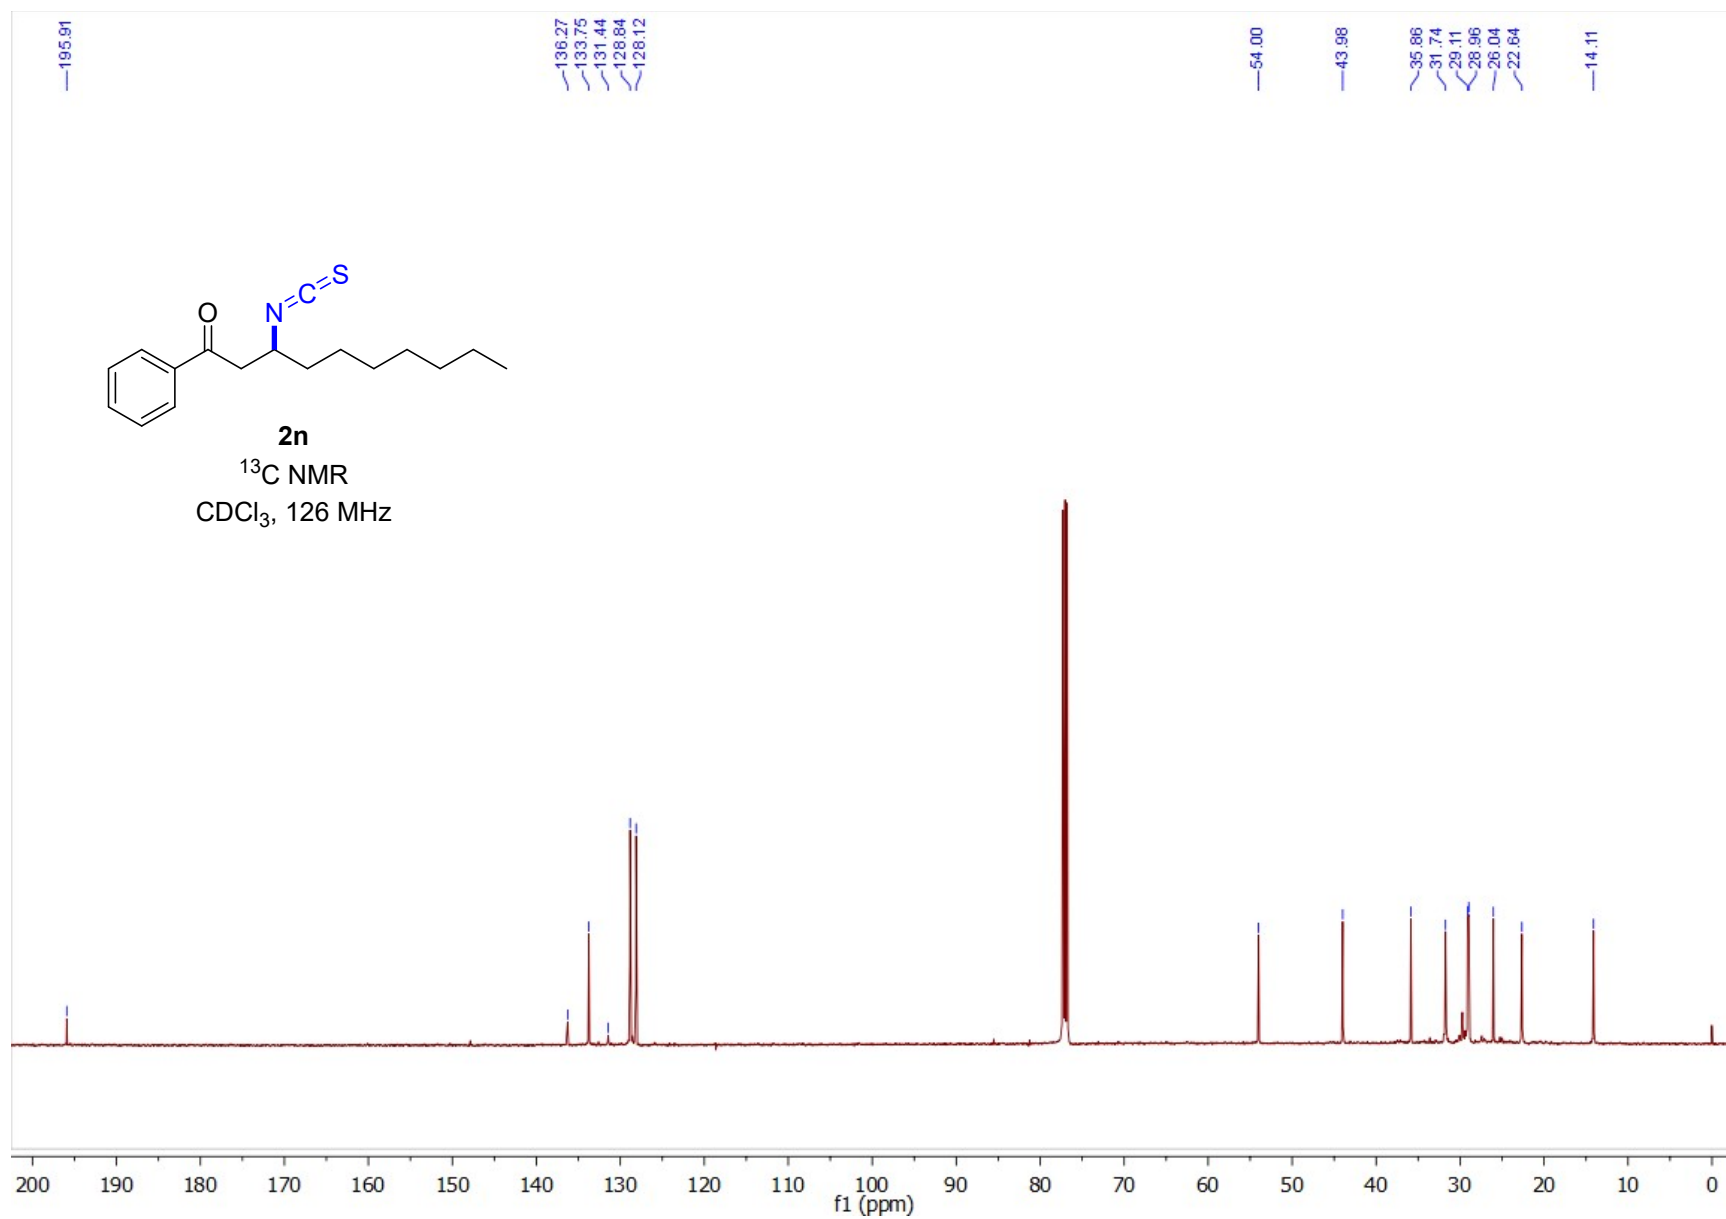



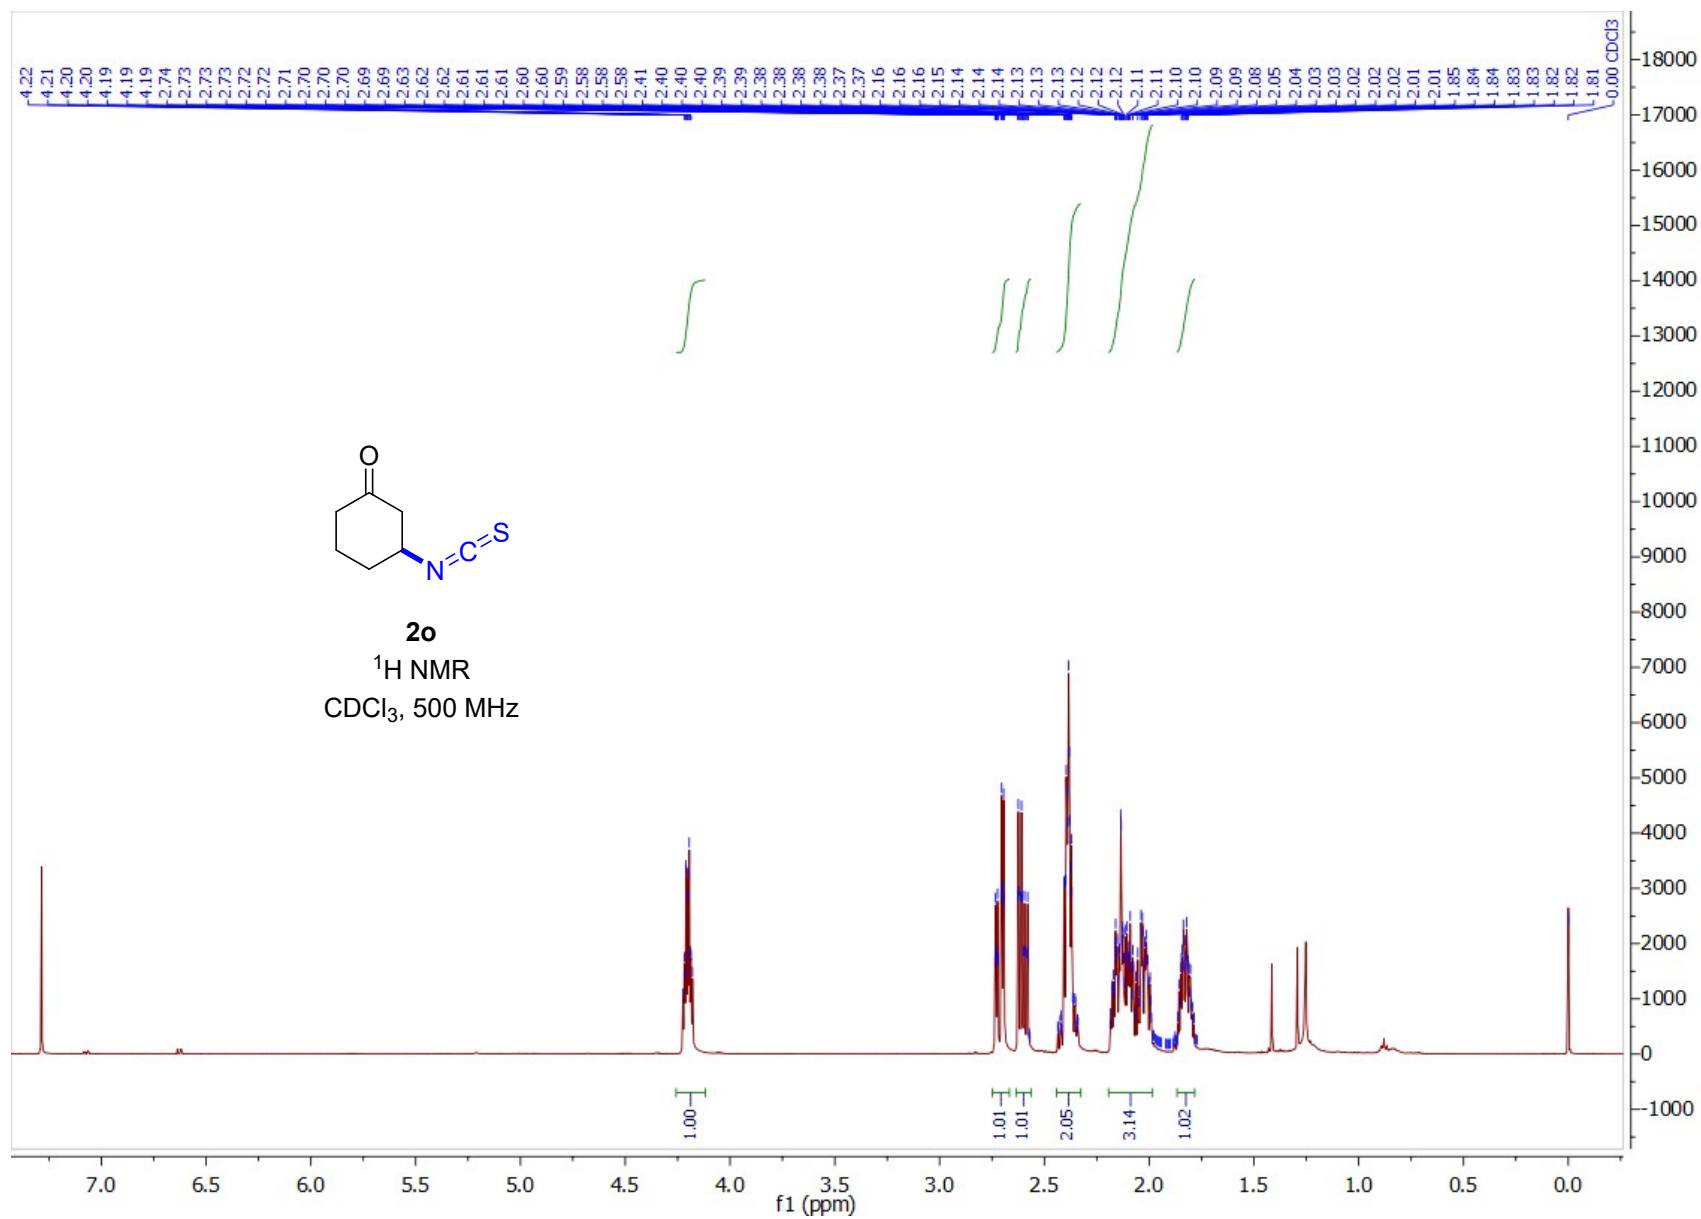

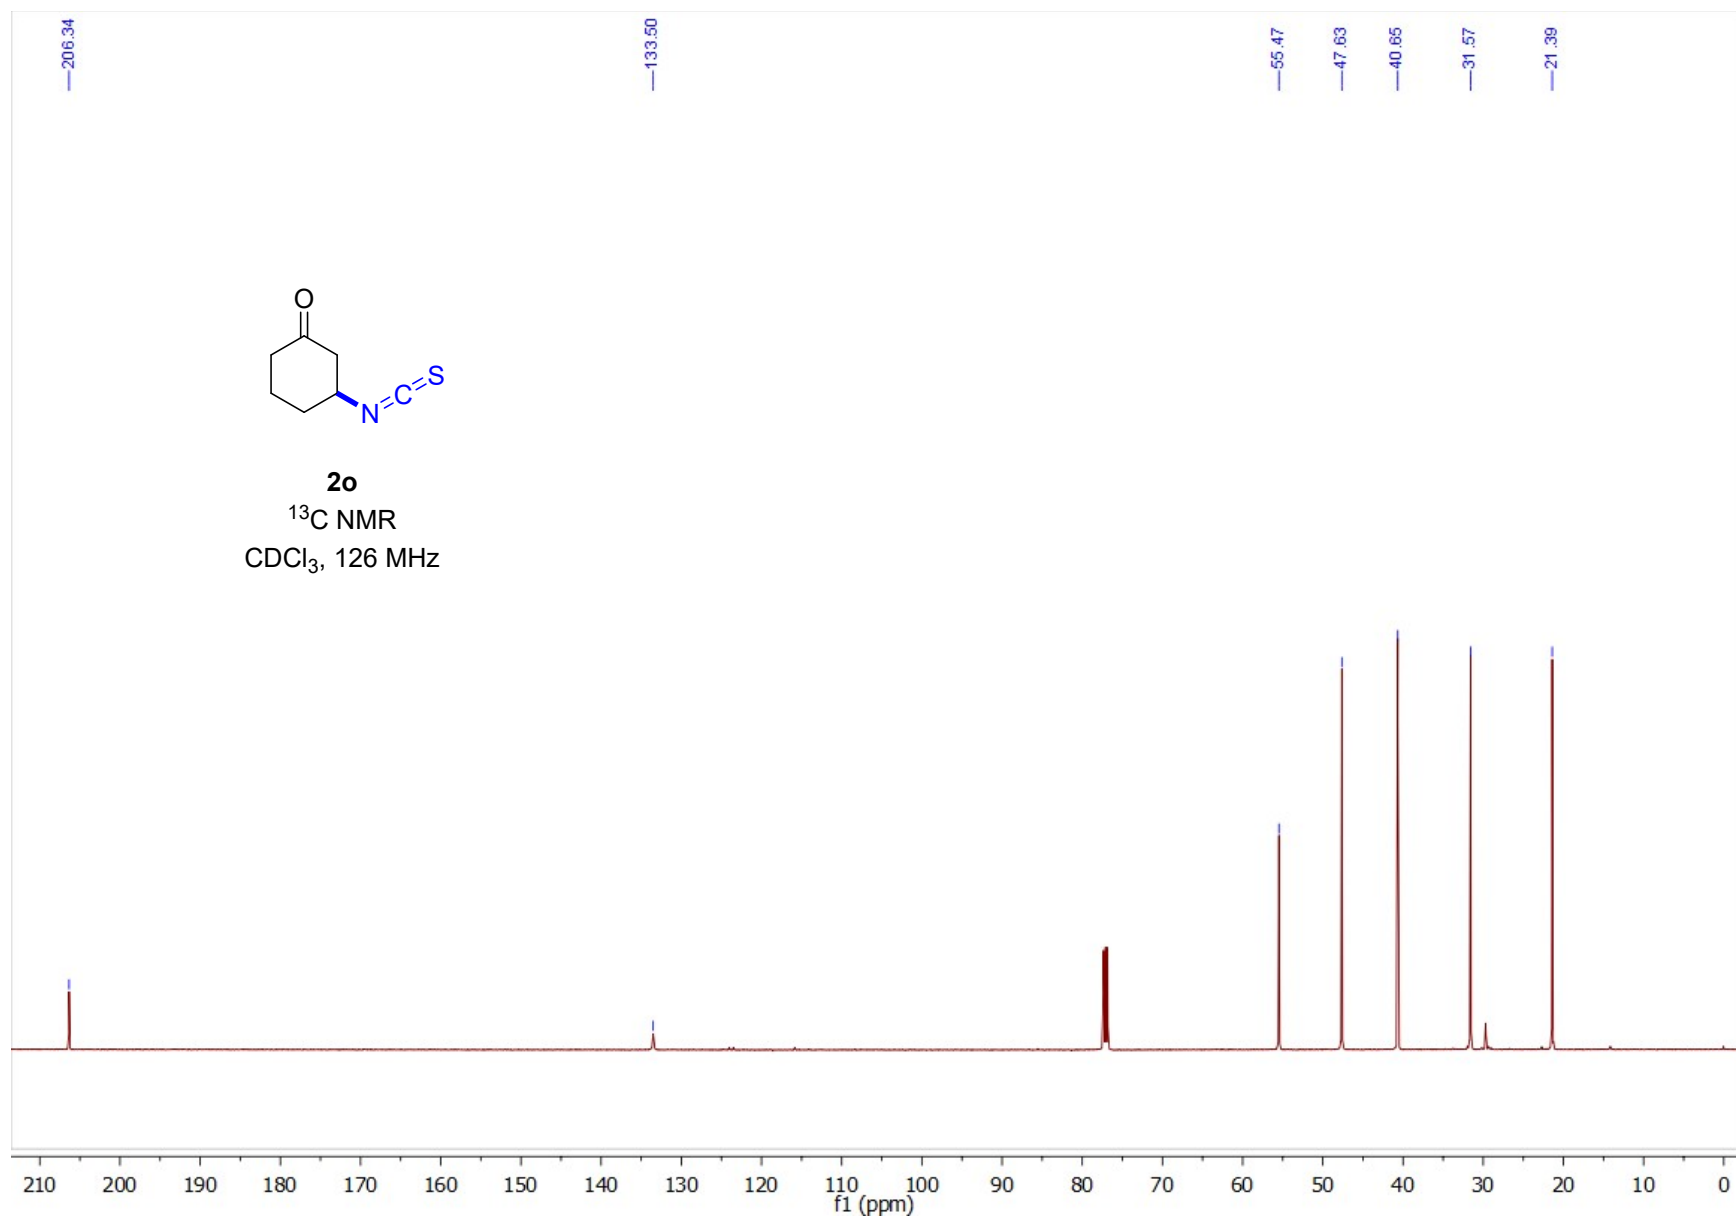

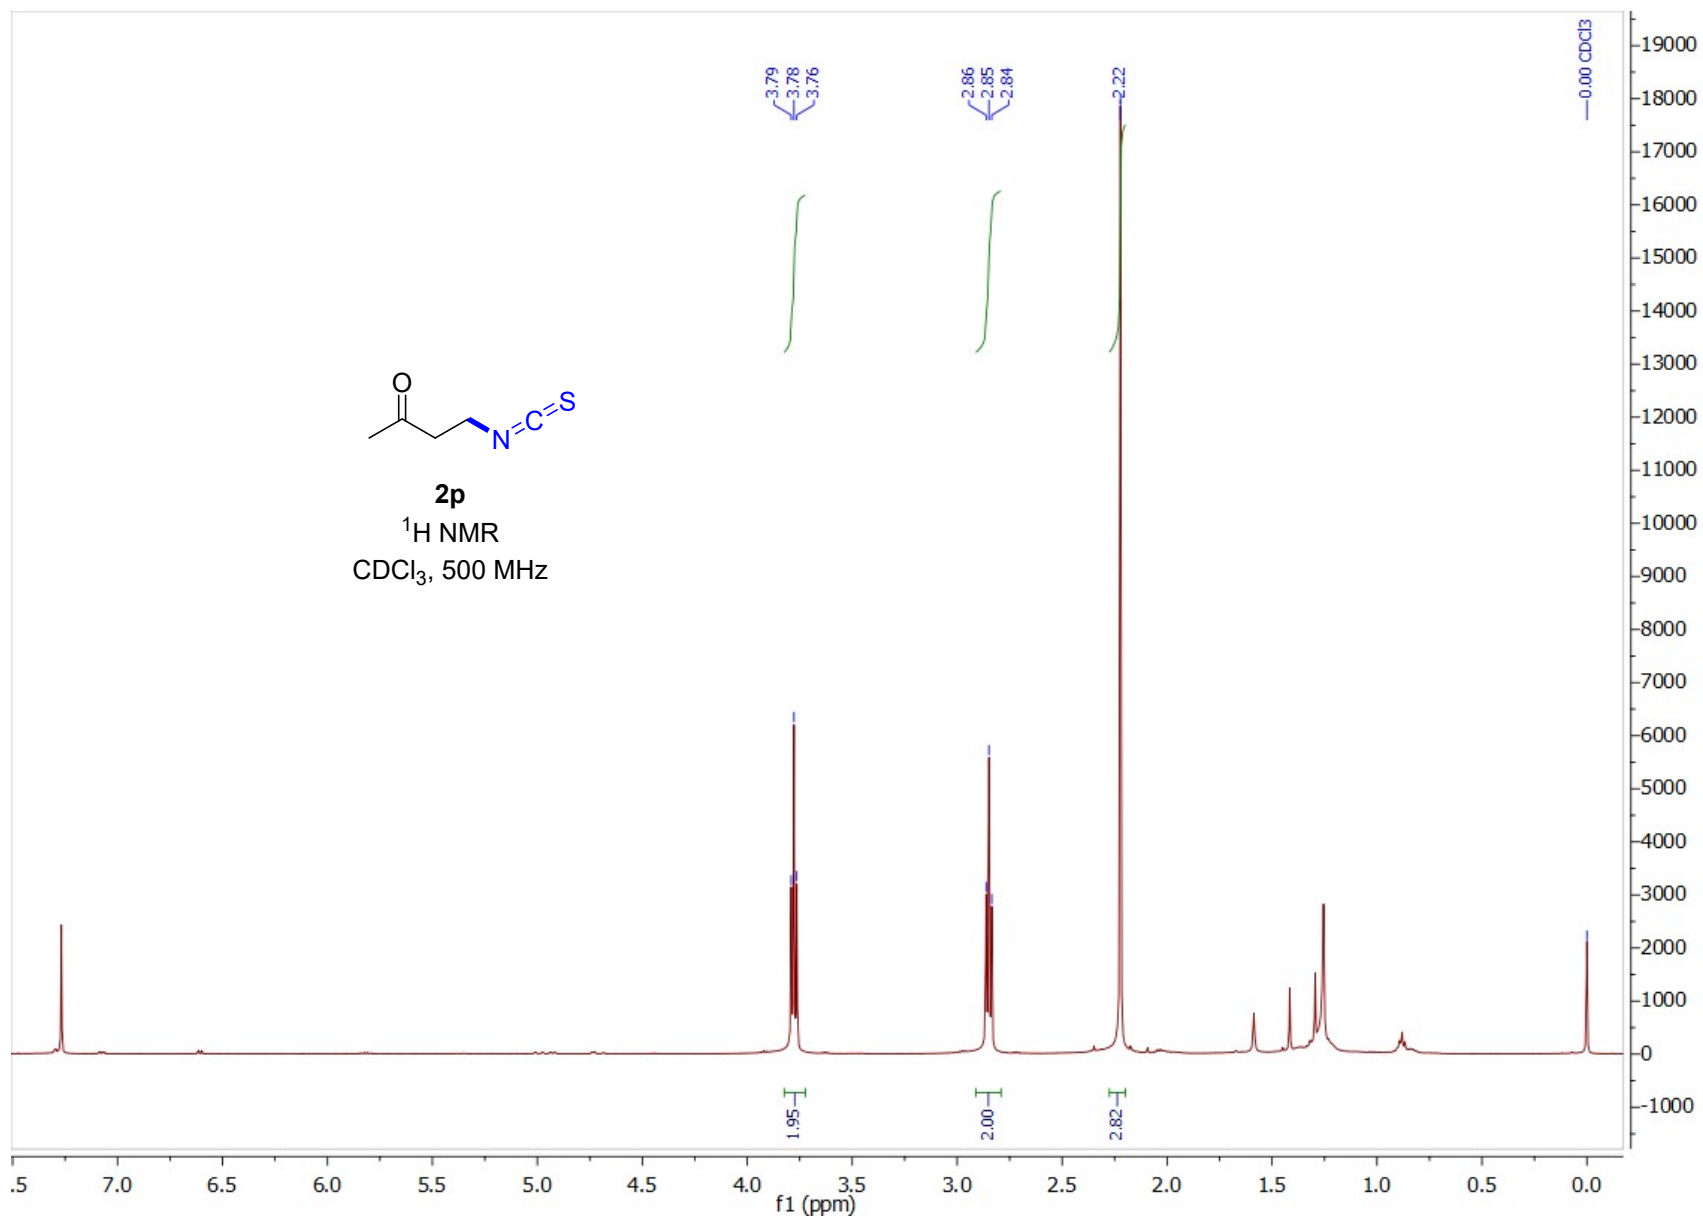

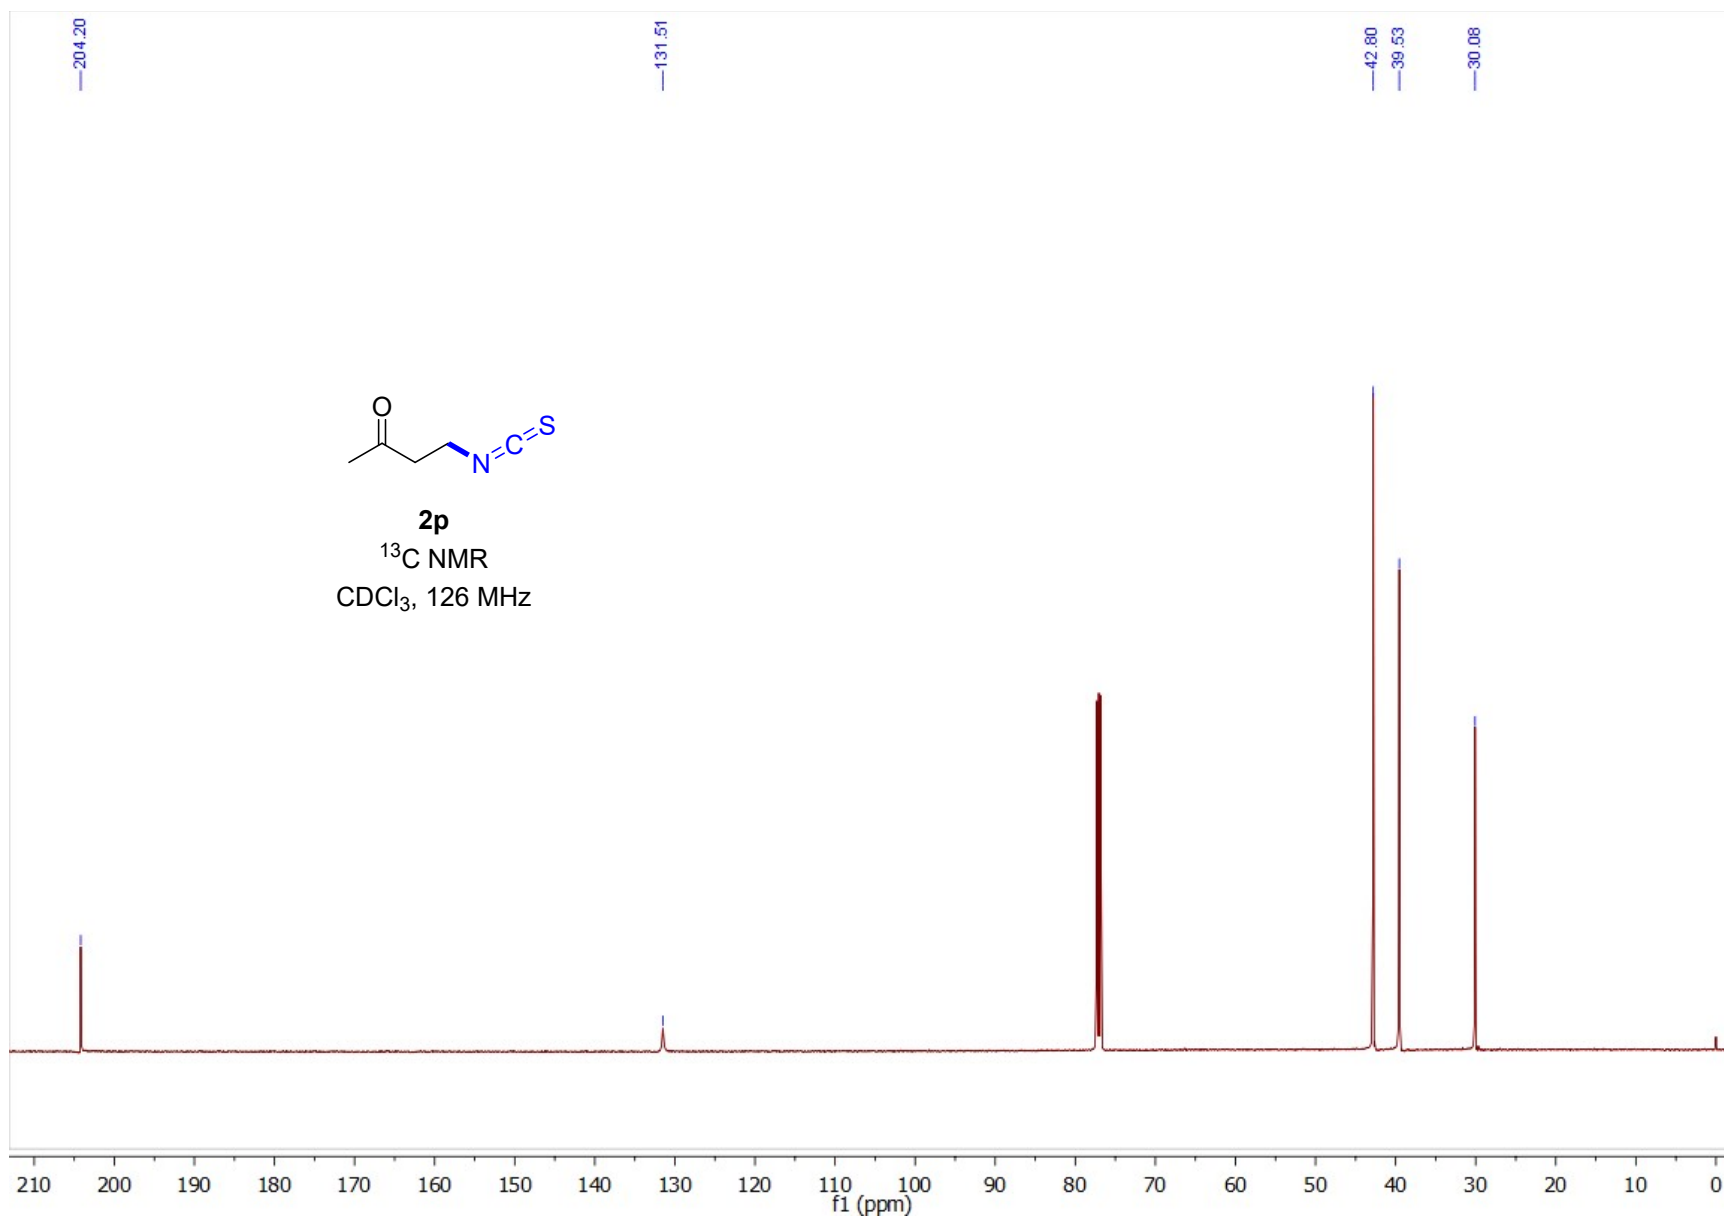

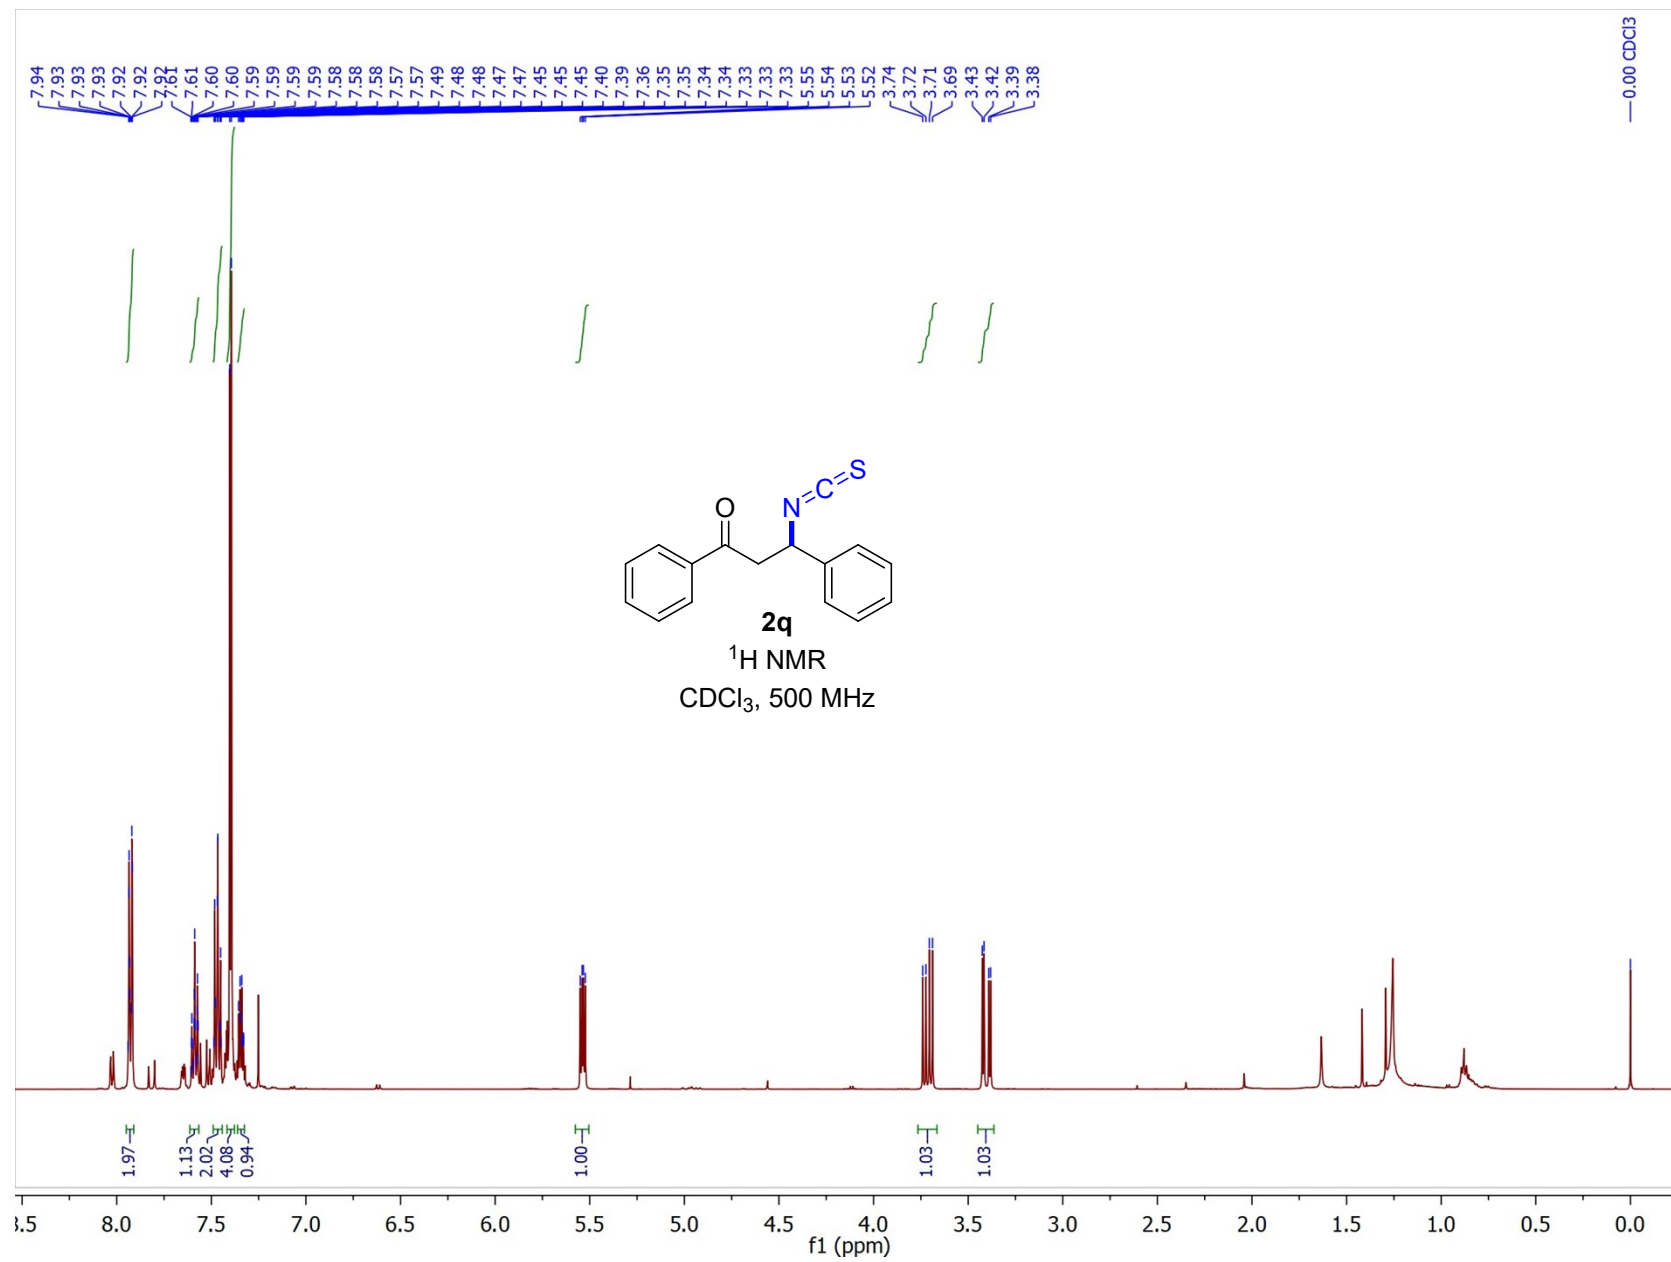

S101

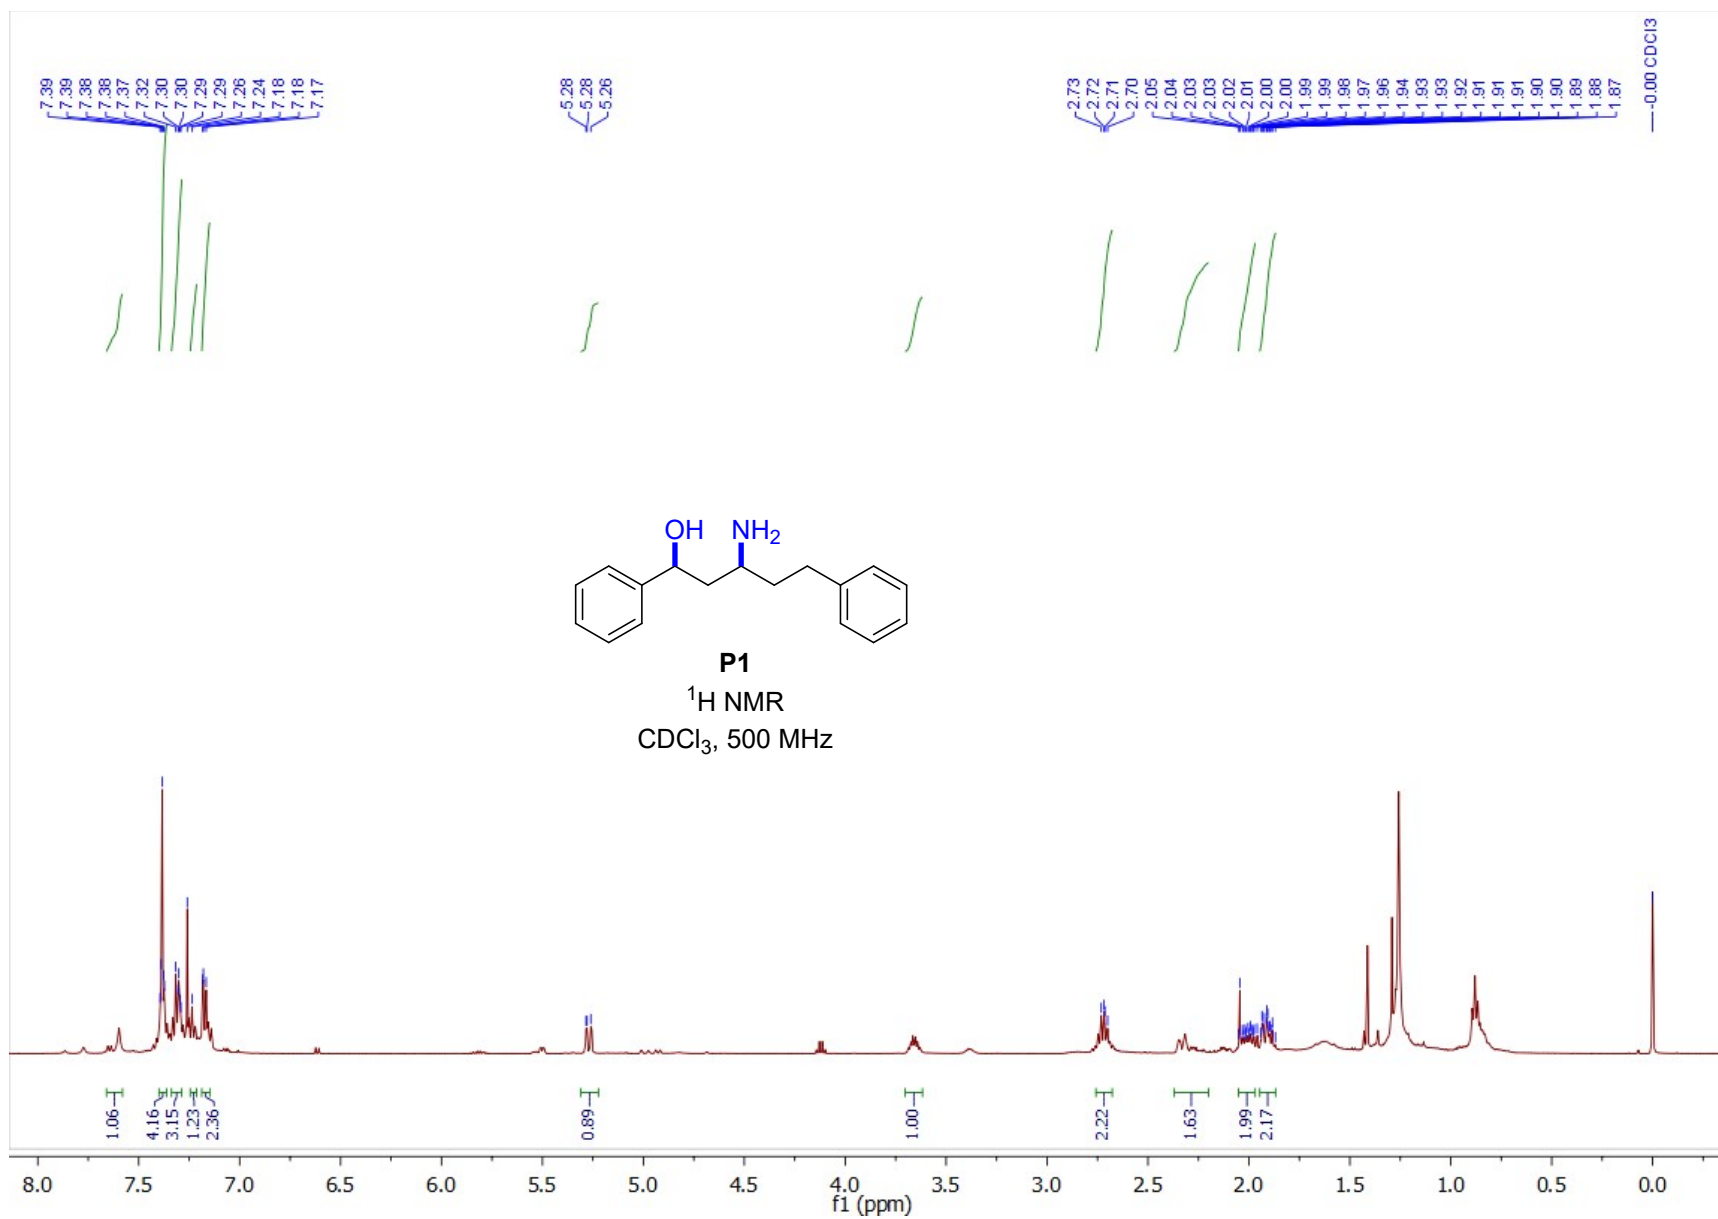

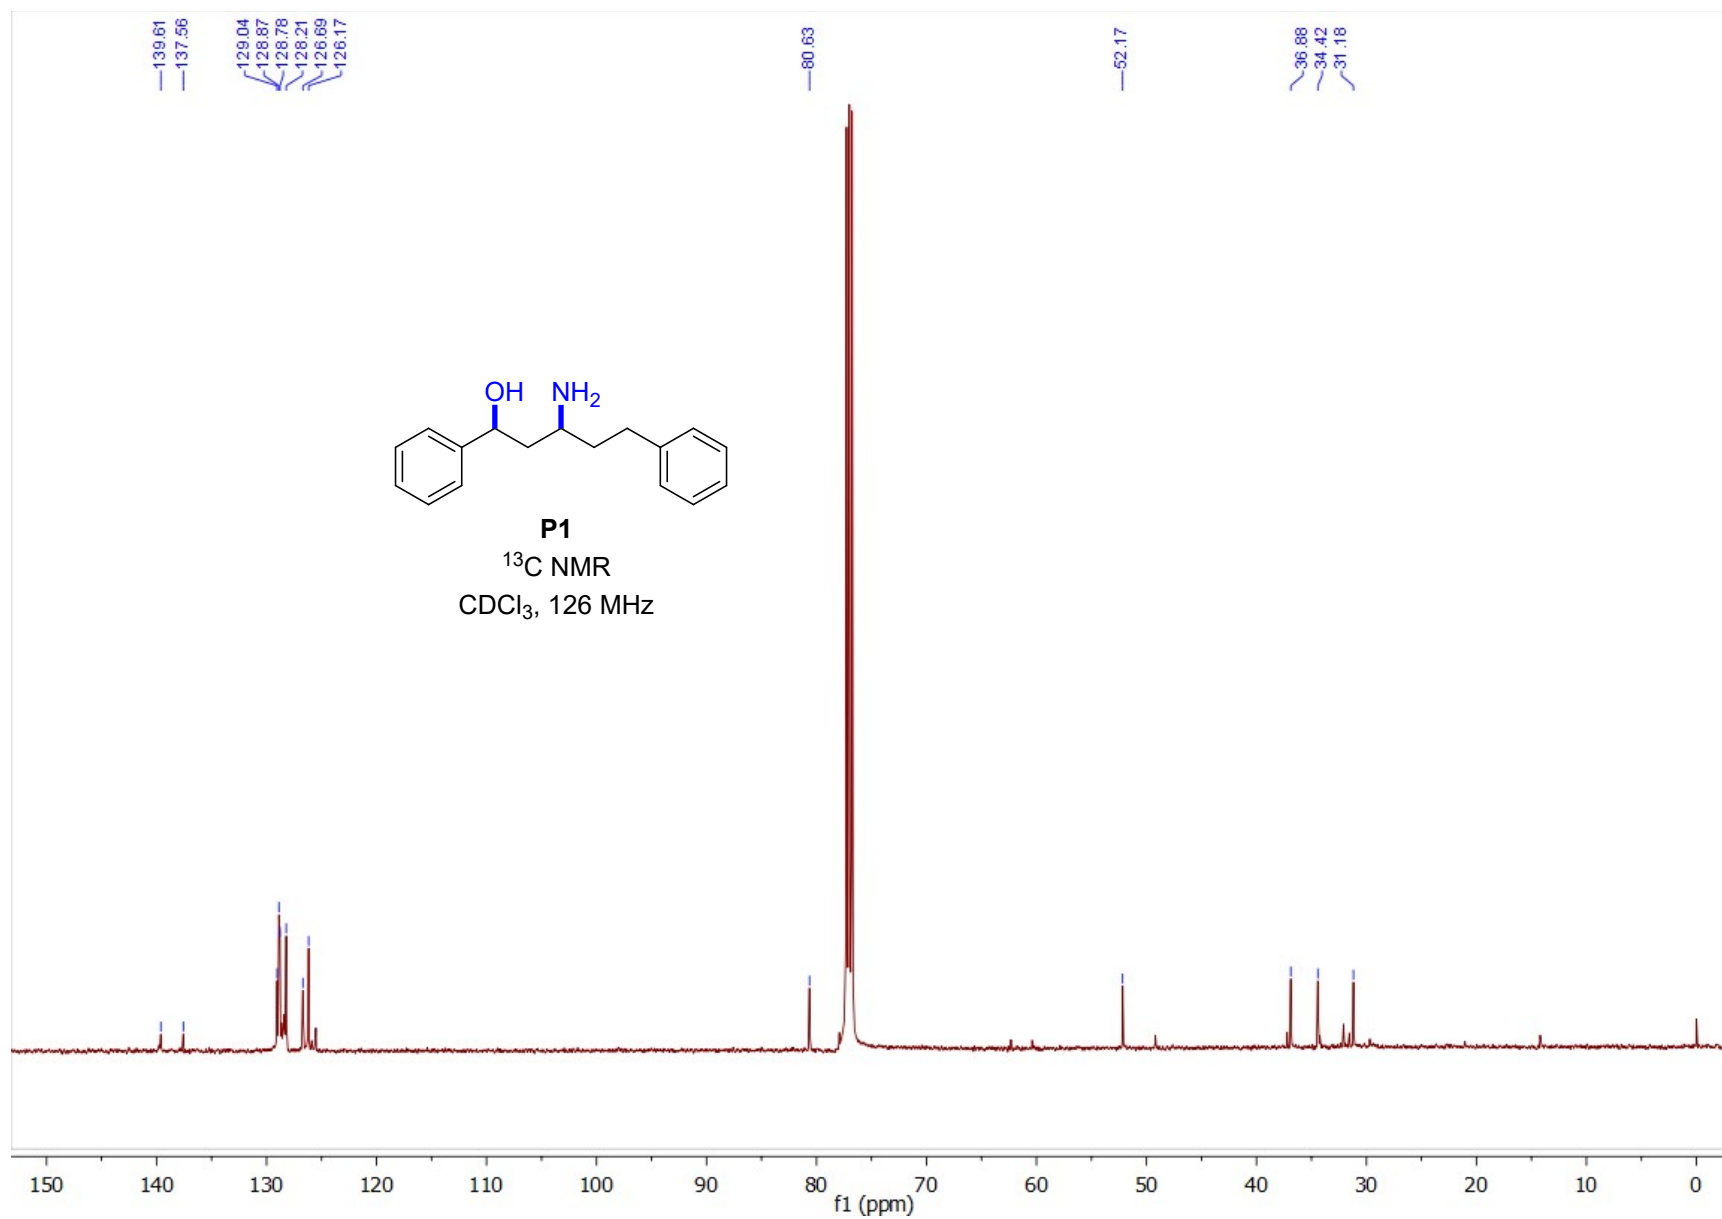

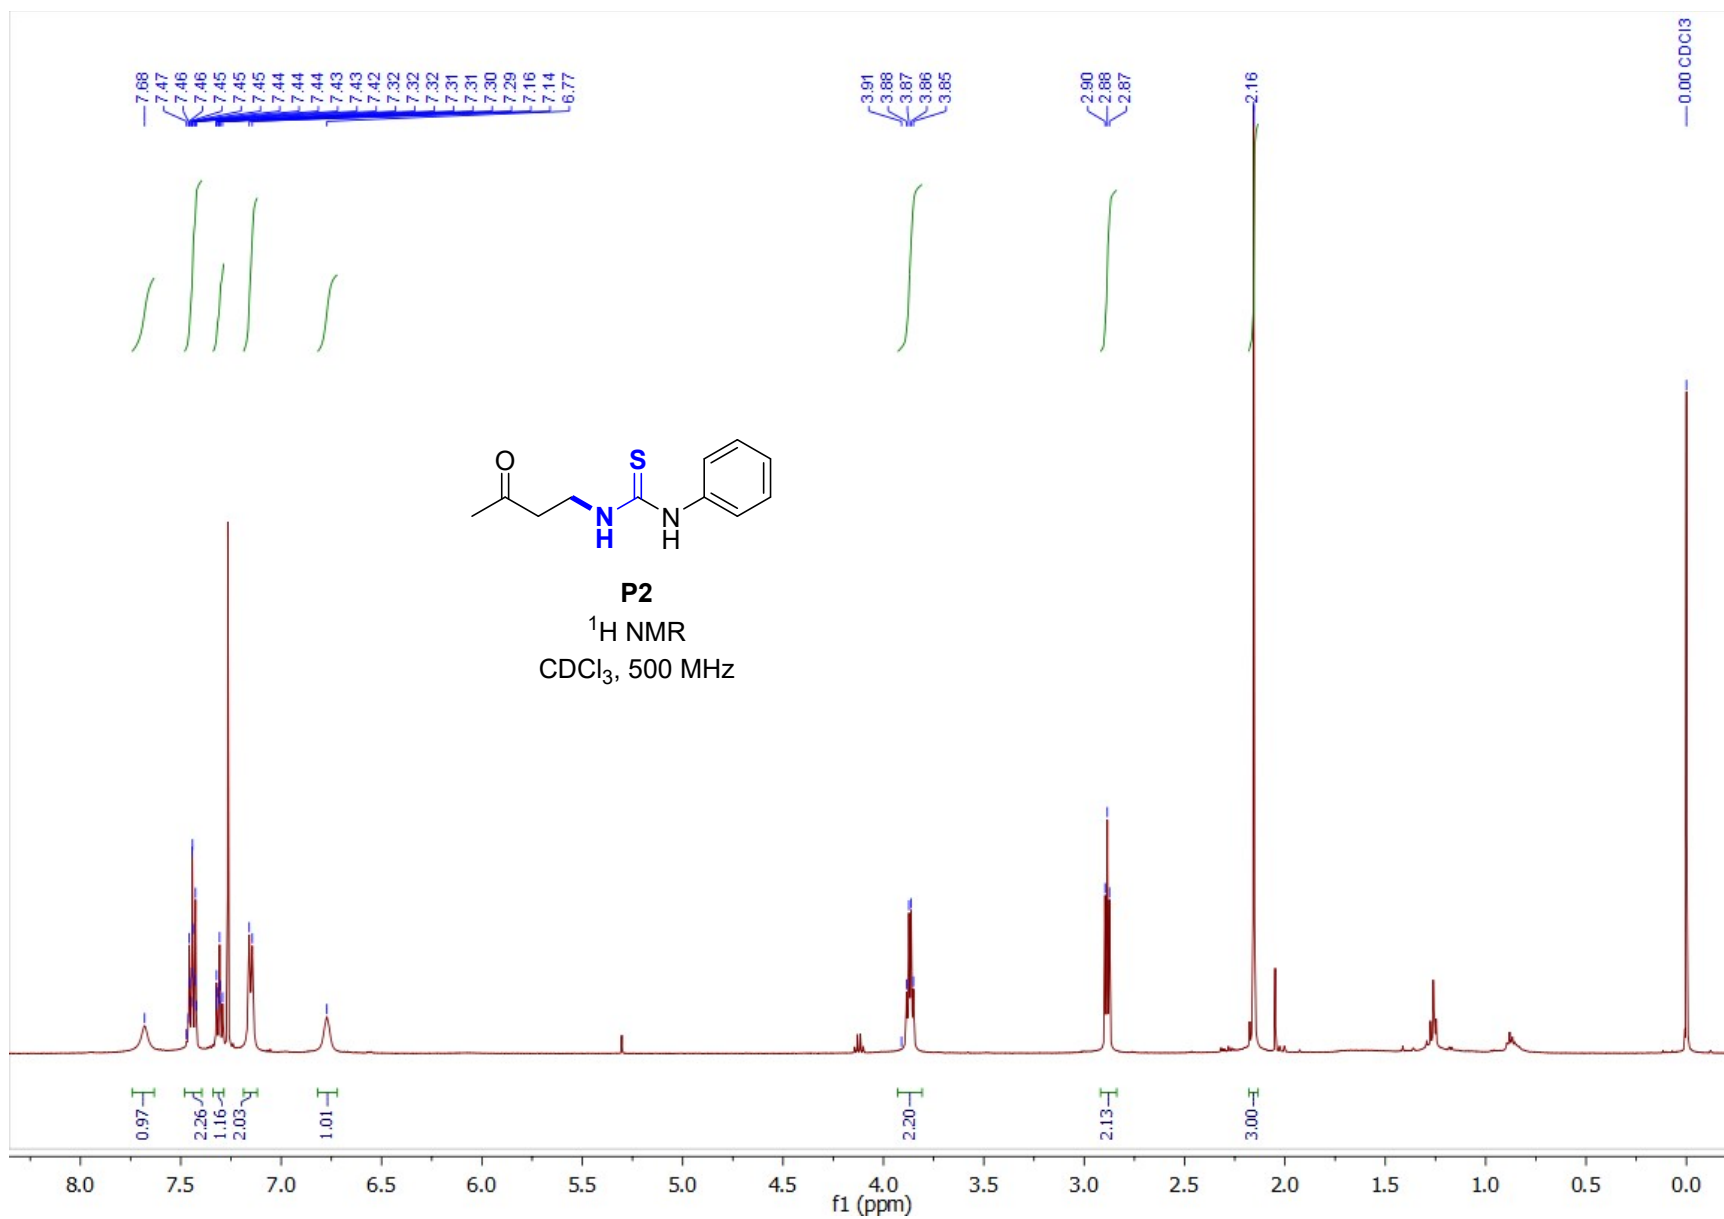



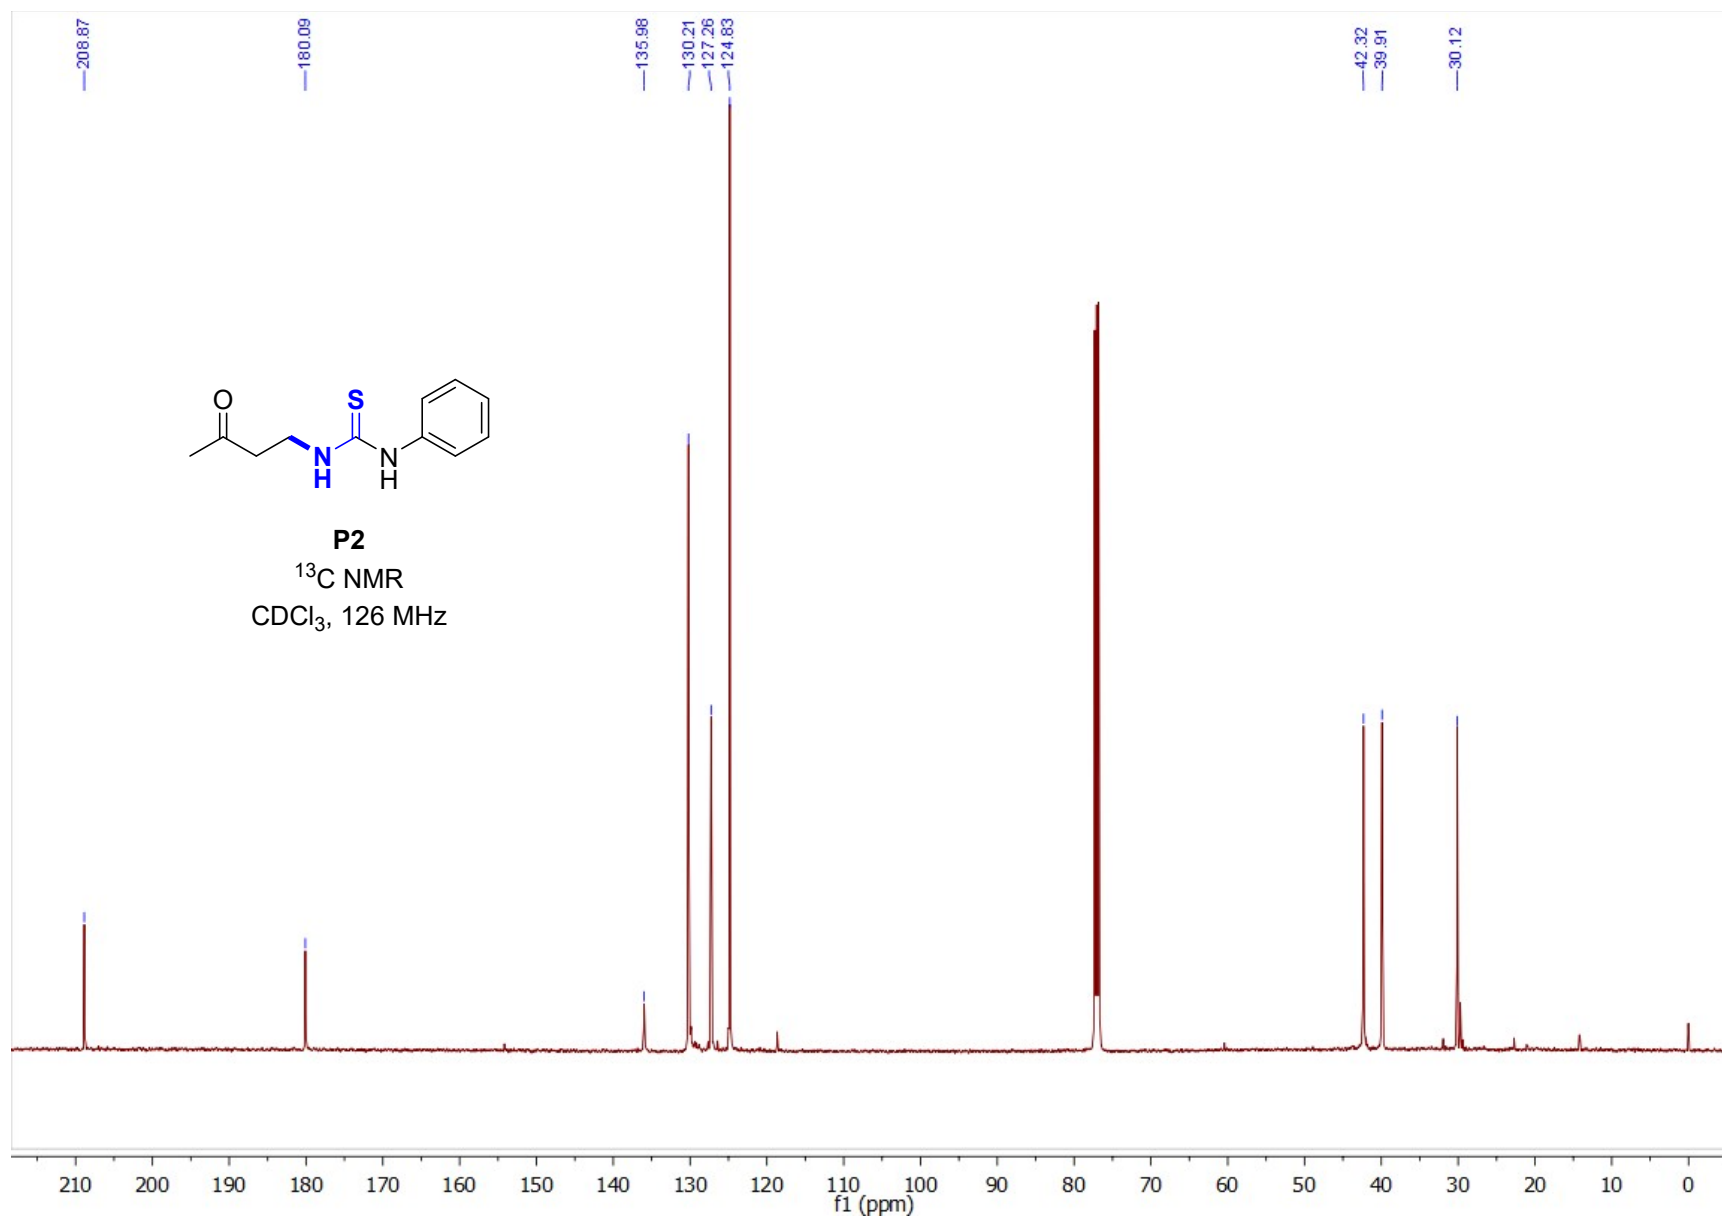

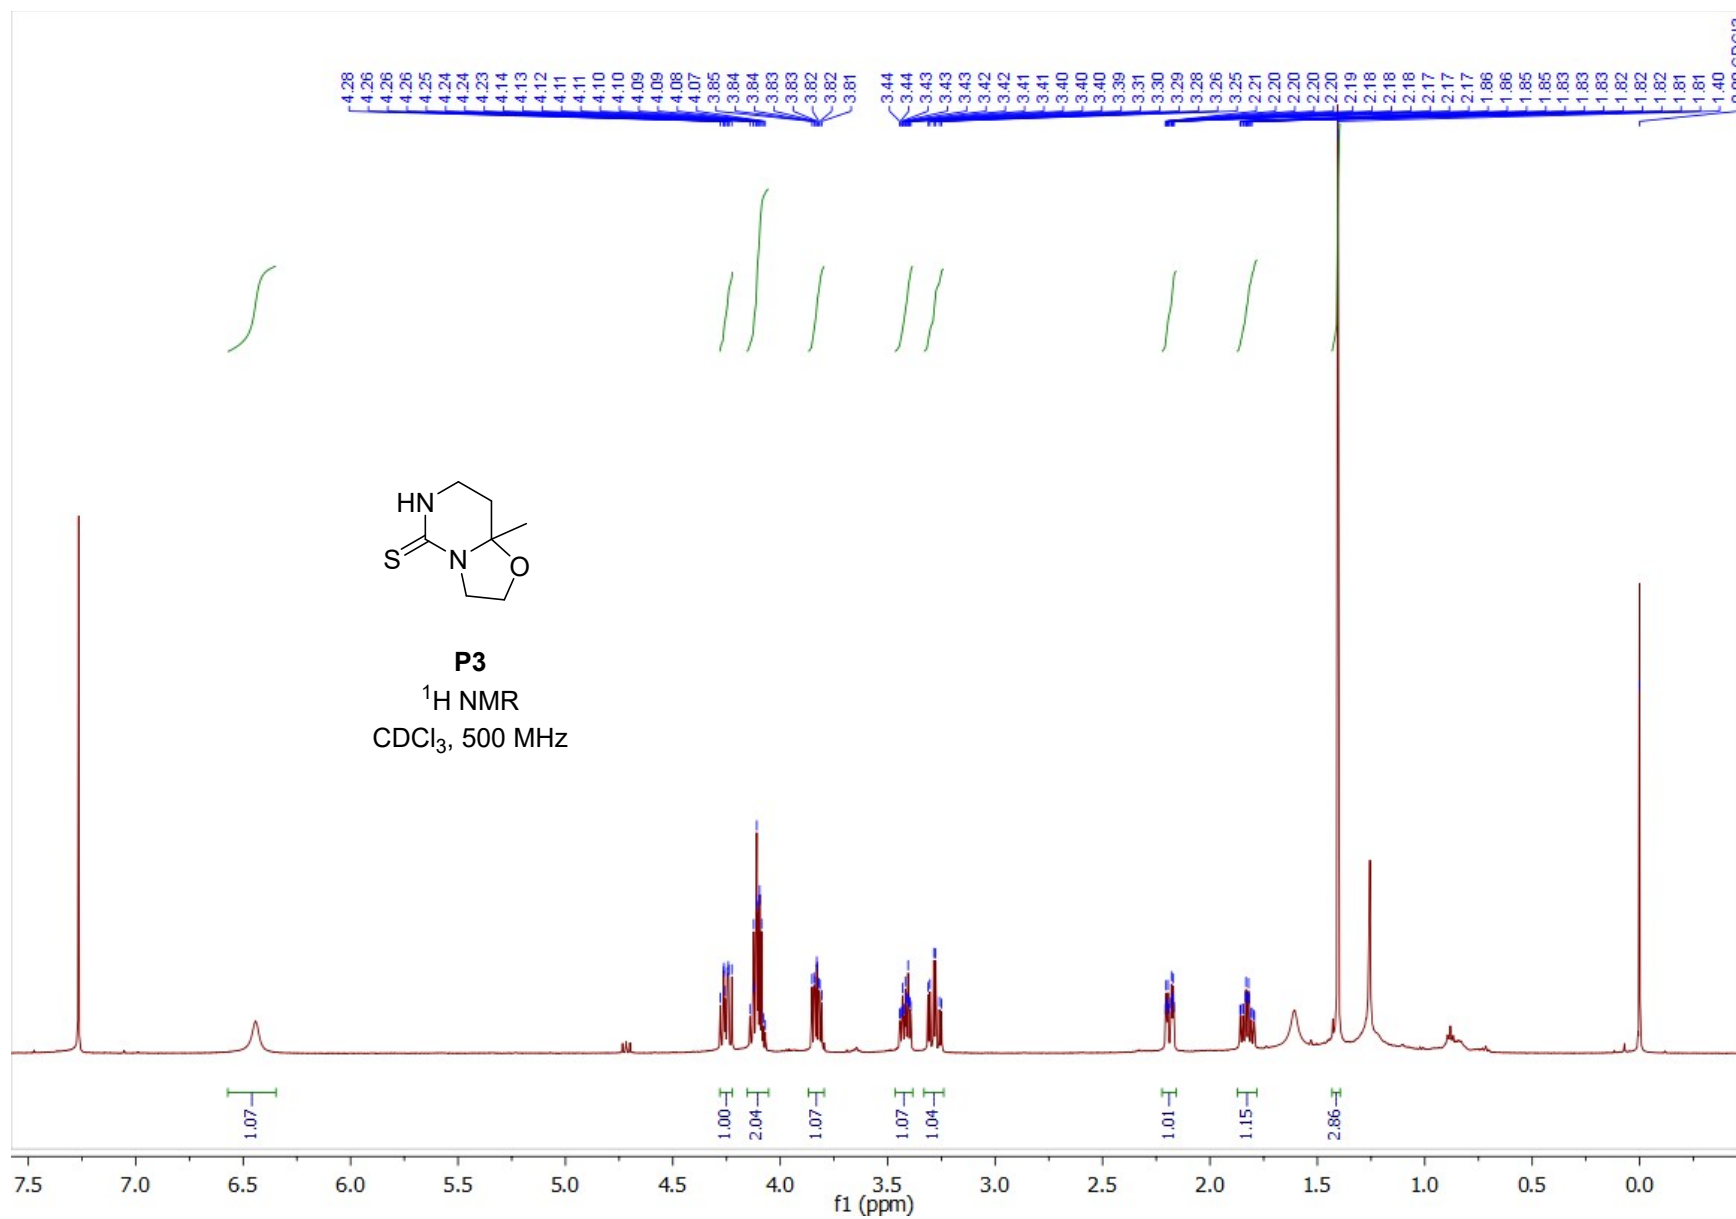

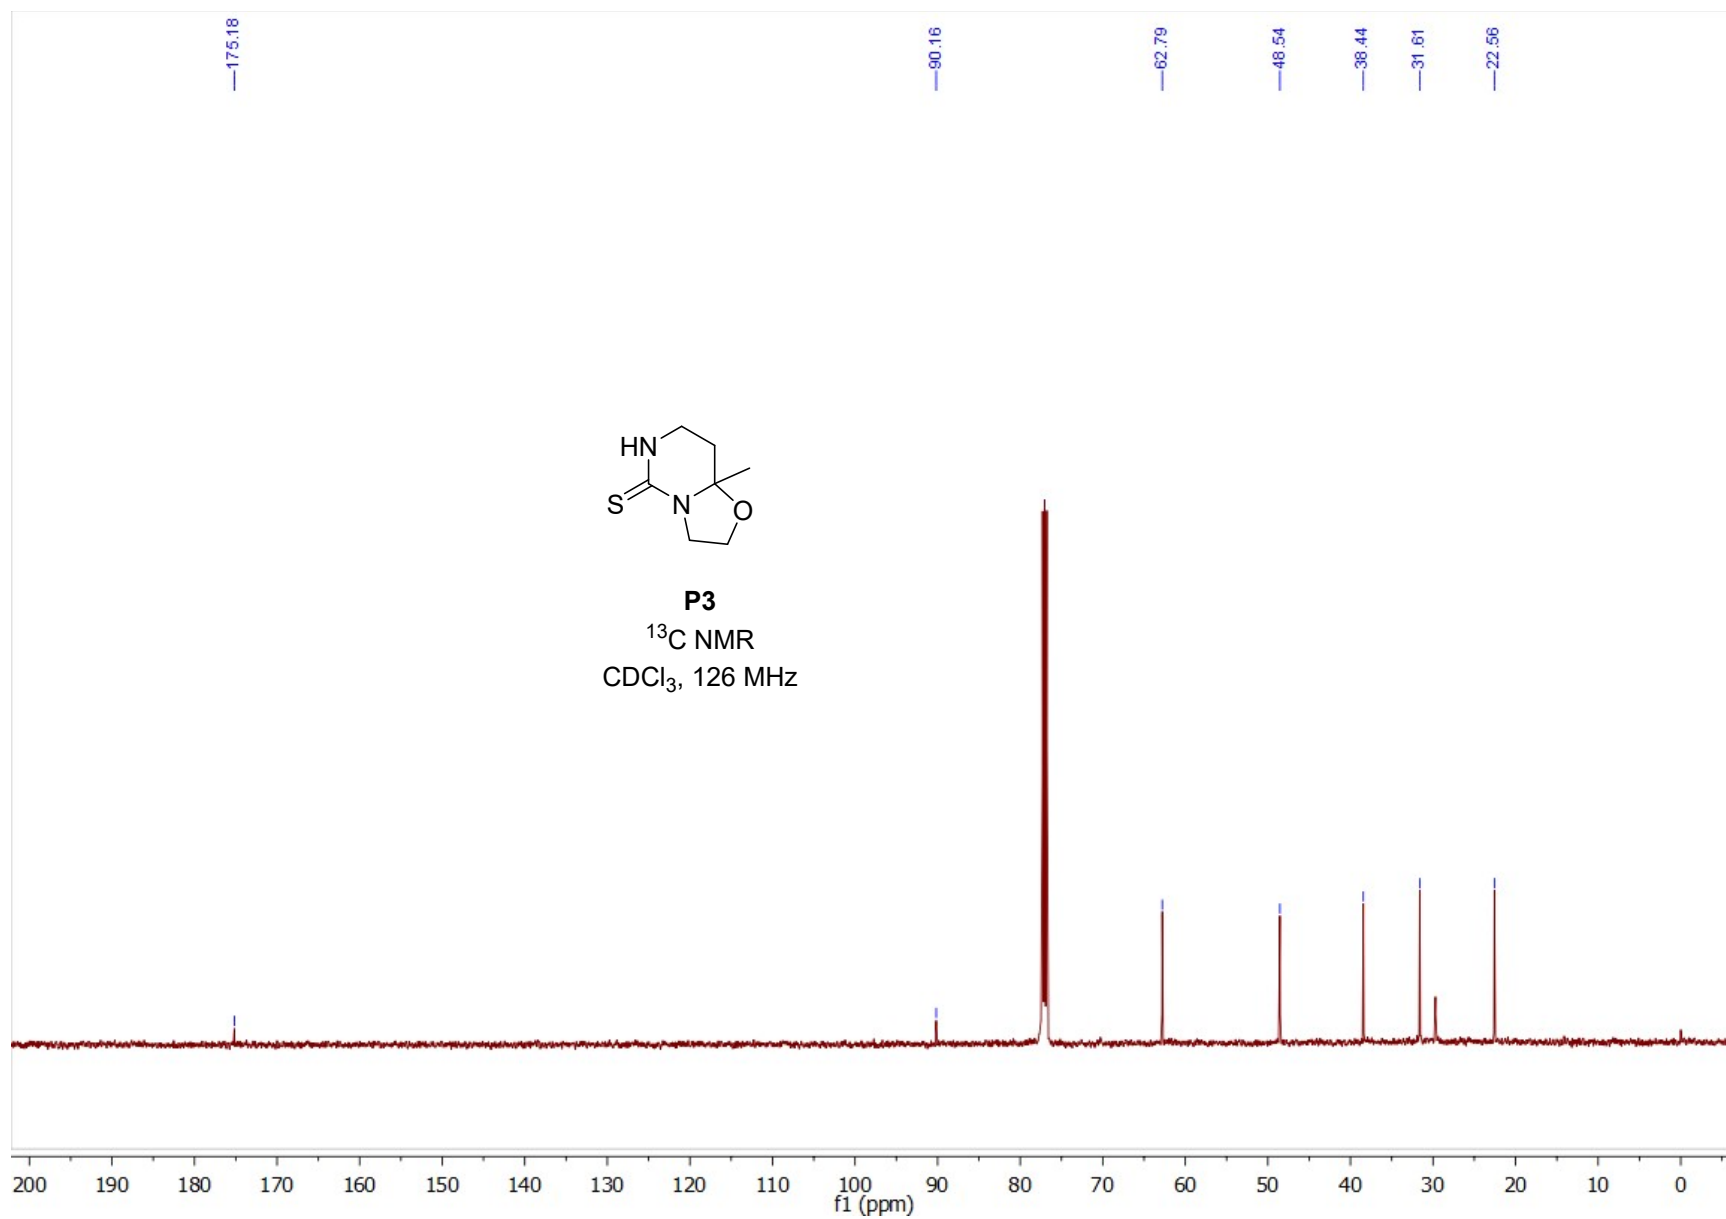

## 11. References

- (1) Kohler, E. P.; Chadwell, H. M. Benzalacetophenone. *Org. Synth.* **1922**, *2*, 1. DOI: 10.15227/orgsyn.002.0001.
- (2) Humbrías-Martín, J.; Pérez-Aguilar, M. C.; Mas-Ballesté, R.; Dentoni Litta, A.; Lattanzi, A.; Della Sala, G.; Fernández-Salas, J. A.; Alemán, J. Enantioselective Conjugate Azidation of  $\alpha,\beta$ -Unsaturated Ketones under Bifunctional Organocatalysis by Direct Activation of TMSN<sub>3</sub>. *Adv. Synth. Catal.* **2019**, *361* (20), 4790-4796. DOI: 10.1002/adsc.201900831.
- (3) Ghosh, A. K.; Shahabi, D. Synthesis of amide derivatives for electron deficient amines and functionalized carboxylic acids using EDC and DMAP and a catalytic amount of HOBT as the coupling reagents. *Tetrahedron Lett* **2021**, 63. DOI: 10.1016/j.tetlet.2020.152719.
- (4) Neises, B.; Steglich, W. Simple method for the esterification of carboxylic acids. *Angew Chem Int Ed Engl* **1978**, *17* (7), 522-524.
- (5) Wang, C.; Zhang, Y. F.; Guo, S.; Zhao, Q.; Zeng, Y.; Xie, Z.; Xie, X.; Lu, B.; Hu, Y. GPR52 Antagonist Reduces Huntingtin Levels and Ameliorates Huntington's Disease-Related Phenotypes. *J. Med. Chem.* **2021**, *64* (2), 941-957. DOI: 10.1021/acs.jmedchem.0c01133.
- (6) Farley, C. M.; Zhou, Y. Y.; Banka, N.; Uyeda, C. Catalytic Cyclooligomerization of Enones with Three Methylene Equivalents. *J Am Chem Soc* **2018**, *140* (40), 12710-12714. DOI: 10.1021/jacs.8b08296.
- (7) Zhou, Y.; Sun, M.; Zhao, J.; Zhou, B.; Yang, X.; Geng, H.; Miao, F. Preparation of  $\alpha,\beta$ -unsaturated ketone compound and their application as acaricidal drug. CN105669418 2016.
- (8) Ling, Y.; Lu, Y.; Sun, L.; Sun, Y.; Yang, X. (E)-1-aryl-5-phenyl-2-alkene-1-pentanone compounds and synthesis and application thereof. CN201010100986A 2010.
- (9) Thomson, C. J.; Barber, D. M.; Dixon, D. J. One-Pot Catalytic Enantioselective Synthesis of 2-Pyrazolines. *Angew Chem Int Ed Engl* **2019**, *58* (8), 2469-2473. DOI: 10.1002/anie.201811471.
- (10) Feng, H.; Zhao, Y.; Liu, P.; Hu, L. Sc(OTf)<sub>3</sub>-Catalyzed C-C Bond-Forming Reaction of Cyclic Peroxy Ketals for the Synthesis of Highly Functionalized 1,2-Dioxene Endoperoxides. *Org. Lett.* **2021**, *23* (5), 1632-1637. DOI: 10.1021/acs.orglett.1c00056.
- (11) Deng, X. Z.; Chen, Z. Y.; Song, Y.; Xue, F.; Yamane, M.; Yue, Y. N. Direct Access to  $\alpha,\beta$ -Unsaturated Ketones via Rh/MgCl<sub>2</sub>-Mediated Acylation of Vinylsilanes. *J Org Chem* **2021**, *86* (18), 12693-12704. DOI: 10.1021/acs.joc.1c01205.
- (12) Vyvyan, J. R.; Pavia, D. L.; Lampman, G. M.; Kriz Jr., G. S. Preparing Students for Research: Synthesis of Substituted Chalcones as a Comprehensive Guided-Inquiry Experience. *J. Chem. Educ.* **2002**, *79* (9), 1119-1121.
- (13) Theodorou, V.; Gogou, M.; Philippidou, M.; Ragoussis, V.; Paraskevopoulos, G.; Skobridis, K. Synthesis of  $\beta,\gamma$ -unsaturated primary amides from  $\alpha,\beta$ -unsaturated acids and investigation of the mechanism. *Tetrahedron* **2011**, *67* (31), 5630-5634. DOI: 10.1016/j.tet.2011.05.096.
- (14) Fesenko, A. A.; Dem'yachenko, E. A.; Fedorova, G. A.; Shutalev, A. D. A selective synthesis of  $\beta$ -isothiocyanato ketones through a Staudinger/aza-Wittig reaction of  $\beta$ -azido ketones. *Monatsh. Chem.* **2012**, *144* (3), 351-359. DOI: 10.1007/s00706-012-0869-3.
- (15) Smith, P. A. S.; Emerson, D. W. The Isomerization of Alkyl Thiocyanates to Isothiocyanates. *J. Am. Chem. Soc.* **1960**, *82* (12), 3076-3082.
- (16) Braverman, S.; Cherkinsky, M.; Birsa, M. L. Product Class 2: Carbon Dioxide, Carbonyl Sulfide, Carbon Disulfide, Isocyanates, Isothiocyanates, Carbodiimides, and Their Selenium, Tellurium, and Phosphorus Analogues. **2005**.
- (17) Katritzky, A. R.; Gruntz, U.; Mongelli, N.; Rezende, M. C. Heterocycles in organic synthesis. Part 22. The conversion of amines to thiocarbonate esters and thiocyanates. *Journal of the Chemical Society, Perkin Transactions 1* **1979**, 1953-1956.

- (18) Li, D.; Shu, Y.; Li, P.; Zhang, W.; Ni, H.; Cao, Y. Synthesis and structure–activity relationships of aliphatic isothiocyanate analogs as antibiotic agents. *Med. Chem. Res.* **2013**, *22*, 3119-3125.
- (19) Lieber., E.; Rao., C. N. R.; Ramacgandran., J. The infrared spectra of organic thiocyanates and isothiocyanates. *Spectrochim. Acta* **1959**, *13* (4), 296-299.
- (20) Miller, F. A.; White, W. B. Infrared and Raman Spectra of Methyl Thiocyanate and Methyl Isothiocyanate. *Zeitschrift für Elektrochemie, Berichte der Bunsengesellschaft für physikalische Chemie* **1960**, *64* (5), 701-707.
- (21) Fesenko, A. A.; Solovyev, P. A.; Shutalev, A. D. Practical synthesis of  $\beta$ -isothiocyanato ketones from chalcones. *Synth. Commun.* **2016**, *46* (8), 678-684. DOI: 10.1080/00397911.2016.1167221.
- (22) Gómez, A. Synthesis of 4,5-disubstituted 2-aminothiazoles from  $\alpha,\beta$ -unsaturated ketones: Preparation of 5-benzyl-4-methyl-2-aminothiazolium hydrochloride salt. *Org. Synth.* **2014**, *91*, 185-200. DOI: 10.15227/orgsyn.091.0185.
- (23) Verma, Rajeshwar P. Synthesis and Reactions of 3-Oxobutyl Isothiocyanate (OB ITC). *Eur. J. Org. Chem.* **2003**, *2003* (3), 415-420. DOI: 10.1002/ejoc.200390073.
- (24) Singh, H.; Kumar, S. Synthesis of Heterocycles via Enamines. Part 12.' Intramolecular Additions of Nucleophiles to 1,4-Dihydropyrimidine-2(3H)-thione Derivatives: Single-step Synthesis of Condensed Heterocyclic Compounds. *J. Chem. Soc., Perkin Trans. 1* **1987**, 261-264. DOI: <https://doi.org/10.1039/P19870000261>.
- (25) Yamashita, H.; Hatori, M.; Igarashi, M.; Sato, K. Silanol compound and method for the preparation thereof. JP2021116261 2021.
- (26) Gaussian 16, Revision C.01, Frisch, M. J.; Trucks, G. W.; Schlegel, H. B.; Scuseria, G. E.; Robb, M. A.; Cheeseman, J. R.; Scalmani, G.; Barone, V.; Petersson, G. A.; Nakatsuji, H.; Li, X.; Caricato, M.; Marenich, A. V.; Bloino, J.; Janesko, B. G.; Gomperts, R.; Mennucci, B.; Hratchian, H. P.; Ortiz, J. V.; Izmaylov, A. F.; Sonnenberg, J. L.; Williams-Young, D.; Ding, F.; Lipparini, F.; Egidi, F.; Goings, J.; Peng, B.; Petrone, A.; Henderson, T.; Ranasinghe, D.; Zakrzewski, V. G.; Gao, J.; Rega, N.; Zheng, G.; Liang, W.; Hada, M.; Ehara, M.; Toyota, K.; Fukuda, R.; Hasegawa, J.; Ishida, M.; Nakajima, T.; Honda, Y.; Kitao, O.; Nakai, H.; Vreven, T.; Throssell, K.; Montgomery, J. A., Jr.; Peralta, J. E.; Ogliaro, F.; Bearpark, M. J.; Heyd, J. J.; Brothers, E. N.; Kudin, K. N.; Staroverov, V. N.; Keith, T. A.; Kobayashi, R.; Normand, J.; Raghavachari, K.; Rendell, A. P.; Burant, J. C.; Iyengar, S. S.; Tomasi, J.; Cossi, M.; Millam, J. M.; Klene, M.; Adamo, C.; Cammi, R.; Ochterski, J. W.; Martin, R. L.; Morokuma, K.; Farkas, O.; Foresman, J. B.; Fox, D. J. Gaussian, Inc., Wallingford CT, 2016.
- (27) Hohenstein, E. G.; Chill, S. T.; Sherrill, C. D. Assessment of the performance of the M05– 2X and M06– 2X exchange-correlation functionals for noncovalent interactions in biomolecules. *J. Chem. Theory Comput.* **2008**, *4* (12), 1996-2000.
- (28) Marenich, A. V.; Cramer, C. J.; Truhlar, D. G. Universal solvation model based on solute electron density and on a continuum model of the solvent defined by the bulk dielectric constant and atomic surface tensions. *The Journal of Physical Chemistry B* **2009**, *113* (18), 6378-6396.
- (30) Funes-Ardoiz, I.; Paton, R. S. (2018). GoodVibes: GoodVibes 2.0.3 <http://doi.org/10.5281/zenodo.595246>
- (30) Grimme, S. Supramolecular binding thermodynamics by dispersion-corrected density functional theory. *Chemistry–A European Journal* **2012**, *18* (32), 9955-9964.
- (31) CYLview, 1.0.565b; Legault, C. Y. Université de Sherbrooke 2009, <http://www.cylview.org>
- (32) Guda, D. R.; Wang, T.; Cho, H. M.; Lee, M. E. Trimethylsilyl isothiocyanate (TMSNCS): an efficient reagent for the one-pot synthesis of mercapto-1, 2, 4-triazoles. *Tetrahedron Lett.* **2012**, *53* (39), 5238-5242.
